# Supplementary material
Source: MDPI journal article supplement (https://www.mdpi.com/1422-0067/15/12/22492)
Supplement: s1 [file s1]

Archive with 2 entries (2 files):
- Supplementary Table S1-S16-proofreading.xlsx
- Supplementary Figures S1-S5 final.pdf
