# Supplementary material for: Comprehensive Analysis of Neonatal versus Adult Unilateral Decortication in a Mouse Model Using Behavioral, Neuroanatomical, and DNA Microarray Approaches
Source: MDPI journal article supplement (doi:10.3390/ijms151222492), 2014-12-05
Supplement: s1 [file s1 › Supplementary Table S1-S16-proofreading.xlsx]

## Sheet: Table S1
Table S1. The NBH 1 week up-regulated genes.
GE2		Cy3 :252800513657					GE2	Normalization : Data Transformation											over 50							0.1–10
		Cy5 :252800513658					657_1_1	658_1_1	657_1_2	658_1_2	657_1_3	658_1_3	657_1_4	658_1_4	657_2_1	658_2_1	657_2_2	658_2_2	657_2_3	658_2_3	657_2_4	658_2_4
							Y1		Y2		Y3		Y4		Y5		Y6		Y7		Y8		Y5/Y2
Probe Name	Gene Symbol	Gene Name	Accession String	Description	GO_ID	SEQUENCE	gProcessed Signal	rProcessed Signal	gProcessed Signal	rProcessed Signal	gProcessed Signal	rProcessed Signal	gProcessed Signal	rProcessed Signal	gProcessed Signal	rProcessed Signal	gProcessed Signal	rProcessed Signal	gProcessed Signal	rProcessed Signal	gProcessed Signal	rProcessed Signal	gProcessed Signal	rProcessed Signal	aveFOLD
A_55_P2289235	BC046401	cDNA sequence BC046401	gb|BC046401|tc|TC1601779	Mus musculus cDNA sequence BC046401, mRNA (cDNA clone IMAGE:5320259), partial cds. [BC046401]		GAGTAATTTCTCTATTTCTCACCCAGAATGAGCTCATTTTAGGCCAAGGCTATTTTTAAA	0.01	0.01	0.01	0.01	0.01	0.01	0.01	0.01	101	61.2	10.7	9.85	0.01	0.01	0.01	0.01	10100	6120	8110	0.605941
A_51_P151423	9230112D13Rik	RIKEN cDNA 9230112D13 gene	ref|NM_030062|ens|ENSMUST00000022325|gb|AK020336|tc|TC1593923	Mus musculus RIKEN cDNA 9230112D13 gene (9230112D13Rik), mRNA [NM_030062]	GO:0003674(molecular_function)|GO:0005575(cellular_component)|GO:0008150(biological_process)	ATGTCCAAAATTCAGCTTTTCCTTGTCATCACACATCTGATGGTATACGCAACTGCCAAA	1.82507	0.01	0.01	0.01	6.37	11.9	10.2	15.3	85	71.9	0.326	0.01	36.8	16.3	17.2	15.6	8500	7190	7845	0.845882
A_30_P01023630			chr12:56607657-56613582_F	lincRNA:chr12:56607657-56613582 forward strand		CTATGAAAAGTTTCCAAGCATGTAGATTTTCATATTATGAGCAGGGCACAGAACTGTACC	0.01	0.01	0.01	0.01	0.01	0.01	0.01	0.01	66.1	86.2	1.02	0.01	0.01	0.01	0.01	0.01	6610	8620	7615	1.30408
A_30_P01029915			chr13:98479793-98481177_R	lincRNA:chr13:98479793-98481177 reverse strand		AAAGAGAAGCAAAAGACACCCCAGTTGTTATTAATAGGCCAAAGTAAAAGATTCACTCAC	3.86626	6.02	0.01	0.01	0.01	5.3	13.9	9.93	82.4	55.8	46.3	11.6	238	41.9	48.4	25.5	8240	5580	6910	0.677184
A_51_P123625	Irg1	immunoresponsive gene 1	ref|NM_008392|ens|ENSMUST00000022722|gb|AK152177|gb|L38281	Mus musculus immunoresponsive gene 1 (Irg1), mRNA [NM_008392]	GO:0002760(positive regulation of antimicrobial humoral response)|GO:0005739(mitochondrion)|GO:0006952(defense response)|GO:0006954(inflammatory response)|GO:0007566(embryo implantation)|GO:0008152(metabolic process)|GO:0016829(lyase activity)|GO:0019543(propionate catabolic process)|GO:0032088(negative regulation of NF-kappaB transcription factor activity)|GO:0032480(negative regulation of type …	AGACAGTTTGACTTGGGGTGGTGAACAGTGTGGCATAAGACCCAAGGTTTCATTCTCTAT	13.1157	21.7	0.636	0.12	0.01	11.6	20.4	27.9	56.4	51.3	34.6	24.8	51.1	75	21.1	0.582	88.6792	427.5	258.09	4.82074
A_65_P19832	Ttr	transthyretin	ref|NM_013697|ens|ENSMUST00000075312|gb|AK050155|gb|AK018701	Mus musculus transthyretin (Ttr), mRNA [NM_013697]	GO:0005179(hormone activity)|GO:0005576(extracellular region)|GO:0005615(extracellular space)|GO:0006810(transport)|GO:0042562(hormone binding)|GO:0042572(retinol metabolic process)|GO:0042802(identical protein binding)|GO:0043234(protein complex)|GO:0046982(protein heterodimerization activity)	AGATGAGAAGTTTGTAGAAGGAGTGTACAGAGTAGAAACTGGACACCAAATCGTACTGGA	1460.02	2130	330	393	583	703	466	579	32500	37700	16200	19800	472	536	29900	29000	98.4848	95.9288	97.2068	0.974046
A_55_P2087153						CTCACTGACTTGGAAGCACAGCTAAAAGGCTCCTACAAAGTAAGAGGAAGAAGACTGTGA	14.554	20.5	3.14	15.5	13	21.4	28.9	12.9	100	117	26.8	34	23.2	43.7	20.9	4.44	31.8471	7.54839	19.6978	0.237019
A_30_P01021451			chr10:66559716-66647841_F	lincRNA:chr10:66559716-66647841 forward strand		AGGAAAACTGGATAAAAAAAGGGGAGAAGGTTATATGAAAATGGAAAGTATTGGTATAAG	48.0267	64.6	7.02	43.4	12.3	53.9	44.2	79	171	118	62.7	39.6	18.1	61.2	47.9	16.3	24.359	2.71889	13.5389	0.111618
A_30_P01021569			chr11:69184157-69201732_R	lincRNA:chr11:69184157-69201732 reverse strand		CCACTGGAGGAGAGGAAGGGAAAGAGTAGAGATAAAATTGACAACATTCACAGAACACTG	46.7718	47.9	7.69	14.3	29	42.4	69.7	35.9	167	65	61.9	28.3	25.4	67.1	98.4	19.6	21.7165	4.54545	13.131	0.209309
A_55_P2388762	C430019N01Rik	RIKEN cDNA C430019N01 gene	gb|AK049529|tc|TC1613007|riken|C430019N01	Mus musculus 7 days embryo whole body cDNA, RIKEN full-length enriched library, clone:C430019N01 product:unclassifiable, full insert sequence. [AK049529]		GCAATGCCGTGGAAGAAAAGATAAAAATAAAACAAACCCACAGATTGAAACCCACAGCAT	28.9631	0.01	3.45	20.6	12.2	22.4	31.3	9.97	75.2	60.4	96.7	10	55.5	53.5	35.7	19.9	21.7971	2.93204	12.3646	0.134515
A_52_P120132	6030452D12Rik	RIKEN cDNA 6030452D12 gene	ref|XR_035325|ref|XR_035344|gb|AK031558|tc|TC1594710	PREDICTED: Mus musculus RIKEN cDNA 6030452D12 gene (6030452D12Rik), misc_RNA [XR_035325]	GO:0003674(molecular_function)|GO:0005575(cellular_component)|GO:0008150(biological_process)	GACTTGGGTAGAAAGGACAGGTAGGTACAGGTTAATACTTGAAGGCAAACAAAACAAAAC	27.6709	19.9	13.9	3.08	7.22	23.2	54.9	22.7	70.7	54.6	45.7	0.01	4.84	20.8	17.7	5.45	5.08633	17.7273	11.4068	3.48528
A_55_P2018106	Gm14085	predicted gene 14085	ref|NM_001085518|ref|NM_172980|ens|ENSMUST00000110521|ens|ENSMUST00000028652	Mus musculus predicted gene 14085 (Gm14085), mRNA [NM_001085518]	GO:0003674(molecular_function)|GO:0005575(cellular_component)|GO:0008150(biological_process)	GGTGGAGGTGAGGGGAGATATTTTTAAAGTTATATTGGAAACATGTGTGAATTTAAAGAC	34.9633	49.6	3.16	17.4	0.787	14.9	17.4	30.1	59.8	63.6	22.1	11.6	11.7	46.1	1.72	5.33	18.9241	3.65517	11.2896	0.19315
A_30_P01019629			chr3:84617945-84618316_R	lincRNA:chr3:84617945-84618316 reverse strand		TGAAGAGAGGAAGGGGAGGAGCCCAGGCGAGCCTAAGCTACCGCCTGATCTTACCCCTGA	30.4256	29.1	10.2	7.59	19.8	22	58.4	31.5	71.7	118	20.5	38	13.9	28.7	57.7	17.9	7.02941	15.5468	11.2881	2.21167
A_55_P1978571	Otx2	orthodenticle homolog 2 (Drosophila)	ref|NM_001286481|ref|NM_001286482|ref|NM_144841|ref|NM_001286483	Mus musculus orthodenticle homolog 2 (Drosophila) (Otx2), transcript variant 1, mRNA [NM_001286481]	GO:0001077(RNA polymerase II core promoter proximal region sequence-specific DNA binding transcription factor activity involved in positive regulation of transcription)|GO:0001708(cell fate specification)|GO:0003677(DNA binding)|GO:0003700(sequence-specific DNA binding transcription factor activity)|GO:0005515(protein binding)|GO:0005634(nucleus)|GO:0005737(cytoplasm)|GO:0006355(regulation of tra…	TTTCAGGGCTGTGTGGATTGTGCGACTGATTGTCCTAGATGCACTACTTTATTTAAAAAA	26.2803	52.5	7.68	45.3	89.2	110	39.7	68.6	142	176	62.2	81	31.8	59.3	147	130	18.4896	3.88521	11.1874	0.21013
A_55_P1957363						GAGGTGTACAGGAACTCAAGAAGGGAGGTTGTGGGACTGGATGCAAATTTCAGAGGCTAG	31.7998	49	6.06	18.6	3.87	24.2	46.6	31.4	111	67.9	34.7	17	28	74.7	47.9	27.2	18.3168	3.65054	10.9837	0.1993
A_55_P1966239	Podxl	podocalyxin-like	ens|ENSMUST00000136877|nap|NAP101580-1	podocalyxin-like [Source:MGI Symbol;Acc:MGI:1351317] [ENSMUST00000136877]	GO:0001726(ruffle)|GO:0005737(cytoplasm)|GO:0005886(plasma membrane)|GO:0007155(cell adhesion)|GO:0007162(negative regulation of cell adhesion)|GO:0016020(membrane)|GO:0016021(integral to membrane)|GO:0016324(apical plasma membrane)|GO:0016477(cell migration)|GO:0022408(negative regulation of cell-cell adhesion)|GO:0030027(lamellipodium)|GO:0030175(filopodium)|GO:0030335(positive regulation of ce…	GGATGGAGAAGAGAAAAAAGATCTCAAGGACAAAATGTCTTCAGAAATCTCTCTCCATGA	14.9202	29.5	11	19.3	16.4	35.1	45.6	29.6	211	50.8	46.2	26.3	17.9	26.1	49.6	18.4	19.1818	2.63212	10.907	0.13722
A_51_P230298	Hdgfl1	hepatoma derived growth factor-like 1	ref|NM_008232|ens|ENSMUST00000055915|gb|D63663|gb|AK133357	Mus musculus hepatoma derived growth factor-like 1 (Hdgfl1), mRNA [NM_008232]	GO:0003674(molecular_function)|GO:0005575(cellular_component)|GO:0008150(biological_process)	GGATGGAAGATGAAGAGCAGGGACAACATTCAAAGGTCTGGAAGGAACAGTCTGTAAACT	74.1158	63.8	3.65	30.2	0.01	59.9	57.6	30	66.8	78.5	36.7	33.2	11	48.7	50	30	18.3014	2.59934	10.4504	0.14203
A_30_P01032292			chrX:120963050-120963598_F	lincRNA:chrX:120963050-120963598 forward strand		AGCAAAGAAGCCTGAATCAACAACAACAAAAGATCATGAAATCAAAAAGCCTCAGAAAAT	51.4619	24.6	3.48	27.4	10.3	22.9	27.6	8.13	65.5	54.8	18.5	18.5	0.959	14.5	38.6	3.08	18.8218	2	10.4109	0.10626
A_51_P399845	Fgf2	fibroblast growth factor 2	ref|NM_008006|ens|ENSMUST00000038885|ens|ENSMUST00000138563|gb|AY027551	Mus musculus fibroblast growth factor 2 (Fgf2), mRNA [NM_008006]	GO:0000186(activation of MAPKK activity)|GO:0000189(MAPK import into nucleus)|GO:0001525(angiogenesis)|GO:0001658(branching involved in ureteric bud morphogenesis)|GO:0001759(organ induction)|GO:0001934(positive regulation of protein phosphorylation)|GO:0001938(positive regulation of endothelial cell proliferation)|GO:0002042(cell migration involved in sprouting angiogenesis)|GO:0005102(receptor …	AGCGACCCACACGTCAAACTACAACTCCAAGCAGAAGAGAGAGGAGTTGTGTCTATCAAG	34.1143	38	3.6	24.2	24.3	57.5	29	29.1	65.6	56.2	33.4	44.7	24.5	45.6	62.8	22.5	18.2222	2.32231	10.2723	0.127444
A_55_P2384013	4933438B17Rik	RIKEN cDNA 4933438B17 gene	ref|NR_040685|gb|AK017106|tc|NP741336|riken|4933438B17	Mus musculus RIKEN cDNA 4933438B17 gene (4933438B17Rik), long non-coding RNA [NR_040685]		ACAGCCAGAACAGGACTCCATGTGGAAGAACACAAACAAGTGAGATGCACTGGTTATATG	40.569	30.3	5.94	14.2	8.17	27	33.5	12.2	98.6	51.7	48.8	28.3	29.5	53.2	43.1	2.58	16.5993	3.64085	10.1201	0.219337
A_66_P105735			ens|ENSMUST00000068448|ref|XR_141055|ref|XR_141578|gb|AK039395	predicted gene 9964 [Source:MGI Symbol;Acc:MGI:3642605] [ENSMUST00000068448]		GGTAGCAGGTGACATGTGGGGTGGTTTTATACTCAGGGTGAGTGTAAATAAAGAGACTTA	18.9468	24.6	5.98	14.4	0.01	31.1	50	44.8	91.2	62.4	31.4	33.2	15.4	36.2	54.2	43.4	15.2508	4.33333	9.79208	0.284137
A_66_P111011	Gata3	GATA binding protein 3	ref|NM_008091|ens|ENSMUST00000102976|gb|AK157625|gb|AK156634	Mus musculus GATA binding protein 3 (Gata3), mRNA [NM_008091]	GO:0000122(negative regulation of transcription from RNA polymerase II promoter)|GO:0000790(nuclear chromatin)|GO:0000902(cell morphogenesis)|GO:0000976(transcription regulatory region sequence-specific DNA binding)|GO:0000977(RNA polymerase II regulatory region sequence-specific DNA binding)|GO:0000979(RNA polymerase II core promoter sequence-specific DNA binding)|GO:0000987(core promoter proxim…	TTAAGGAATATAGGGGGATTAAAGTATGGAGATACAGAAGAAACCACTAAGTCTGATGTC	23.3837	37.2	5.17	8.83	2.65	10.8	18.2	2.06	60.1	67.5	5.12	24.8	22.1	20.3	10.4	0.01	11.6248	7.64439	9.63458	0.657596
A_55_P2401646	Trdn	triadin	ref|NM_029726|ens|ENSMUST00000095762|gb|AF223416|gb|AF223417	Mus musculus triadin (Trdn), mRNA [NM_029726]	GO:0005622(intracellular)|GO:0005623(cell)|GO:0005737(cytoplasm)|GO:0005783(endoplasmic reticulum)|GO:0005886(plasma membrane)|GO:0006874(cellular calcium ion homeostasis)|GO:0010880(regulation of release of sequestered calcium ion into cytosol by sarcoplasmic reticulum)|GO:0014701(junctional sarcoplasmic reticulum membrane)|GO:0014808(release of sequestered calcium ion into cytosol by sarcoplasm…	GCTAAGAAGGAAATGAAAGTTGGAAAACAGGAGAAAGTGAAACCAACAGCTGCAAAAGCC	29.5809	33.2	4.47	36.8	7.28	37.3	38.1	12.1	66.6	149	20.6	22.6	30.6	68.1	45.8	3.59	14.8993	4.04891	9.47412	0.271751
A_55_P2054373	Defa-ps1	defensin, alpha, pseudogene 1	ref|NR_003146|ens|ENSMUST00000139711|gb|AY746431	Mus musculus defensin, alpha, pseudogene 1 (Defa-ps1), non-coding RNA [NR_003146]		AACACAGATGAAGAGACTAATACTGAGGAGCAGCCAGGGAAAGAAGACCAAGCTGTTTCT	46.9401	58.7	8.42	37	13.4	50.5	65	31.3	140	85.5	86.1	34	43	50.5	51.6	32.4	16.6271	2.31081	9.46894	0.138979
A_55_P2157963						AAAGAATCCTACCCAATCCTAGGTCGTCTGAGAGGCATCCGGGAAAGAGGTAGGGGAGGG	11.3766	24.1	3.25	20.9	16.7	43.3	33.1	20.8	50.8	69.1	52.1	48.8	13.4	30.1	32.3	16.8	15.6308	3.30622	9.46849	0.21152
A_30_P01023150			chr12:72103832-72116875_R	lincRNA:chr12:72103832-72116875 reverse strand		CCACAGGTAATTCAAACTAGGACAGCATATTTCAGGATTTGAATTAAAGTAGATCTGGAT	26.6286	39.1	15.4	12	44.2	48.4	42.2	48.9	57	178	30	60	126	29.8	32.1	32	3.7013	14.8333	9.26732	4.0076
A_30_P01033421			chr9:65647428-65677119_F	lincRNA:chr9:65647428-65677119 forward strand		AGGATCTAATGTATAAGACAGTAAGAGAATCTCAAGTTTTGACTTCTTGTATCTCGAGAG	30.0728	39.6	8.13	21.7	21.3	34.7	21.3	15.2	114	91	49.3	56.1	22.5	25.1	20.8	27.4	14.0221	4.19355	9.10784	0.299066
A_66_P112109	Gm4598	predicted gene 4598	ref|NR_030681|gb|AK087307|tc|TC1617241|riken|E030043B18	Mus musculus predicted gene 4598 (Gm4598), long non-coding RNA [NR_030681]		CAAACAGGCAGGGAGGGGTAAGGGTAAATTATACATTTTATTCCCAATGTTCAAAATTTA	46.7476	40.4	7.46	24.8	4.13	35.3	35.5	39.2	106	88.9	49.9	22.2	48.1	47.6	110	2.89	14.2091	3.58468	8.8969	0.25228
A_55_P2004337	Fam188b2	family with sequence similarity 188, member B2	ref|XR_104808|ref|XR_107491|gb|AK030561|riken|5330432B20	PREDICTED: Mus musculus family with sequence similarity 188, member B2 (Fam188b2), misc_RNA [XR_104808]		ATCAGAACCAAATGGAGAGAGGCTACCATCAACTGGAATGGAACTATTCCCTTTTTCTAA	38.4187	4.92	6.42	23.5	12.9	24.3	38.3	35.8	74.9	140	136	1.68	7.62	52.4	49.2	56.3	11.6667	5.95745	8.81206	0.510638
A_55_P1953924						GCATTTGACAAAGATGAGAATATATCACCTCAGGTAGAAACAGATGAAGATACGGTGTAA	4.81388	0.01	5.2	10.2	0.01	0.01	3.56	3.14	53.2	65.8	0.01	21.5	0.01	0.01	12.4	0.01	10.2308	6.45098	8.34087	0.630547
A_66_P104661			ens|ENSMUST00000098484|ref|XM_001473330|gb|BB616477|tc|TC1605729	RIKEN cDNA 4930579C12 gene [Source:MGI Symbol;Acc:MGI:2441687] [ENSMUST00000098484]		GTGGGCTCCAGAAAACGCCGGAACATATTTACAATCATAAGAAATATCCATCACCAGAAT	25.2928	37.7	8.71	17.1	44.6	33.5	45.8	18.7	112	62.2	27.9	69.1	14.4	25.7	31.2	21.5	12.8588	3.63743	8.2481	0.282875
A_30_P01022293			chr14:21437920-21464655_R	lincRNA:chr14:21437920-21464655 reverse strand		AGACGGTAGAACGGATGAAAAAATTCCTGAAGGTAACCTGGAGGTGAGGAGGTCAATTTC	26.9968	15.3	4.67	11	5.98	12.6	6.81	9.92	52.8	55.3	19.7	5.39	4.18	20.2	28.2	0.01	11.3062	5.02727	8.16674	0.444647
A_55_P2110941			nap|NAP068937-1			GCAATGAGACCCAGCAGAGAGGTACCCAGATGAGCATCACTCCTGAACTGCTGGACTTGG	17.2701	33.7	6.26	19.7	20.3	19.7	35.2	19.5	79.1	71.9	67.3	34.8	8.67	68.2	51.6	18.3	12.6358	3.64975	8.14276	0.288842
A_30_P01030993			chr6:31017987-31174287_F	lincRNA:chr6:31017987-31174287 forward strand		AACAGGATTCGACAGGACACAGGCATGGGAGCAAGTAACTGAACACTTTTTAACAGACTC	25.6525	47.5	5.73	36.1	7.82	45.9	63.3	19.5	81.5	73.4	52.7	34	27.1	81.5	40.5	35.8	14.2234	2.03324	8.12831	0.142951
A_51_P237865	Il4	interleukin 4	ref|NM_021283|ref|NR_027491|ens|ENSMUST00000000889|gb|M25892	Mus musculus interleukin 4 (Il4), transcript variant 1, mRNA [NM_021283]	GO:0001934(positive regulation of protein phosphorylation)|GO:0002227(innate immune response in mucosa)|GO:0002296(T-helper 1 cell lineage commitment)|GO:0002674(negative regulation of acute inflammatory response)|GO:0002677(negative regulation of chronic inflammatory response)|GO:0005125(cytokine activity)|GO:0005126(cytokine receptor binding)|GO:0005136(interleukin-4 receptor binding)|GO:000557…	GTCCAAGTCCACATCACTGAAAGACTTCCTGGAAAGCCTAAAGAGCATCATGCAAATGGA	10.6089	9.55	15.9	11.5	22.3	25	35.2	36.8	54.5	143	10.6	14.9	16.3	18.2	127	15.1	3.42767	12.4348	7.93123	3.62776
A_30_P01025695			chr4:98943050-98959998_R	lincRNA:chr4:98943050-98959998 reverse strand		TTTCGAGAGAGAGAGGTCCAGGAAGATGGGTATCAGCACAGACCACACAGTACAGCAAGG	37.394	35.2	6.03	31.3	12.3	34.2	82.7	48.4	81.4	60.2	30.9	30.1	33.2	62.4	45.2	34.2	13.4992	1.92332	7.71125	0.142477
A_30_P01024127			chr1:193755364-193770539_F	lincRNA:chr1:193755364-193770539 forward strand		ACCCACCCTAGGAAGGAAGCAGGGAGTCAGGTCTAATAGCTATGGAGCACAGTAACCTTC	42.8295	59.4	7.66	43.5	13.9	37	131	37.2	106	65.5	47.9	34.1	21.5	63.2	88.7	38.7	13.8381	1.50575	7.67193	0.108812
A_55_P1962513	a	nonagouti	ref|NM_015770|ens|ENSMUST00000148402|ens|ENSMUST00000109697|ens|ENSMUST00000148300	Mus musculus nonagouti (a), mRNA [NM_015770]	GO:0005102(receptor binding)|GO:0005515(protein binding)|GO:0005576(extracellular region)|GO:0005623(cell)|GO:0006091(generation of precursor metabolites and energy)|GO:0008343(adult feeding behavior)|GO:0009755(hormone-mediated signaling pathway)|GO:0031779(melanocortin receptor binding)|GO:0031781(type 3 melanocortin receptor binding)|GO:0031782(type 4 melanocortin receptor binding)|GO:0032402(…	GAACAAGAAATCCAAGAAGATCAGCAGAAAAGAAGCCGAGAAGCGGAAGAGGTCTTCCAA	33.9787	44.4	8.71	26.2	9.43	37.5	50.4	22	115	53.5	33.8	26.6	21.2	52.5	39	13.3	13.2032	2.04198	7.6226	0.154658
A_55_P2025796	Fanci	Fanconi anemia, complementation group I	ens|ENSMUST00000118959|gb|BC025462|tc|NP437451	Fanconi anemia, complementation group I [Source:MGI Symbol;Acc:MGI:2384790] [ENSMUST00000118959]	GO:0003674(molecular_function)|GO:0005634(nucleus)|GO:0005886(plasma membrane)|GO:0006281(DNA repair)|GO:0006974(response to DNA damage stimulus)|GO:0007049(cell cycle)|GO:0031398(positive regulation of protein ubiquitination)|GO:0043240(Fanconi anaemia nuclear complex)	AGGAGGGGGAAACTGGTCAGGATGTGCTGTATGAGAGAAGAATAAATTAAACAAAAAGTT	49.1071	83.4	13.2	42.8	5.24	88.1	64	41	165	109	75.9	39.3	32	84	46.4	17.1	12.5	2.54673	7.52336	0.203738
A_30_P01031441			chr8:67542714-67561694_F	lincRNA:chr8:67542714-67561694 forward strand		TAATAAACCCAAAGTAGCTCAAGCCCGTACTCCTGCAGCACTGTGAGTTTAAGACAGACT	23.731	30.3	29.6	15.6	38.4	43.6	60.3	61.5	156	152	203	98	25.4	45.7	189	165	5.27027	9.74359	7.50693	1.84878
A_30_P01025666			chr7:117140887-117152562_F	lincRNA:chr7:117140887-117152562 forward strand		GAACCGTTGAAATCCTAGCCCCTGGAAAGTGGAAGGTGATGATCAGGAGTTTGAGGTCAG	23.415	40	11.6	39.1	31.3	42.1	77	46.7	135	128	51.7	23.7	36.1	156	50.7	28.6	11.6379	3.27366	7.45579	0.281292
A_30_P01026326			chr11:97457180-97487074_F	lincRNA:chr11:97457180-97487074 forward strand		AGCACAGGCAGTGGGTACAGAACCAGAATTGGTGGGTGCAAGAGCTATAGGGATGAGTAA	39.8387	36.2	4.37	18.8	13.4	29.7	43.7	34.4	52.4	53.5	15.3	12	33.8	56.3	51	21.4	11.9908	2.84574	7.4183	0.237326
A_30_P01019187			chr11:22510175-22522025_F	lincRNA:chr11:22510175-22522025 forward strand		GGGTAGCAGAGAAGACAAGGAACACATCAAAAAGACTAGCCCGTAGACATGCAACAAACA	60.09	80.9	15.4	55.1	18.5	71	71.1	49.1	202	94	70.6	31.4	30.4	84.5	56.5	28.2	13.1169	1.70599	7.41144	0.130061
A_55_P2352344			ens|ENSMUST00000156395|gb|AK040863|tc|TC1638024|riken|A530031I11	predicted gene 12575 [Source:MGI Symbol;Acc:MGI:3705119] [ENSMUST00000156395]		TTTGGAATCTCATGAGATGAAACAGTGAAGGGGAAACAACCAAAAGTGGAGGTGGAATGG	22.7369	29.7	4.9	18.6	6.83	86.5	30.5	18.4	58.7	52.7	35.3	26.8	12	44.7	24.4	12.2	11.9796	2.83333	7.40646	0.236513
A_51_P257938	Tacstd2	tumor-associated calcium signal transducer 2	ref|NM_020047|ens|ENSMUST00000058178|gb|BC117719|gb|BC117720	Mus musculus tumor-associated calcium signal transducer 2 (Tacstd2), mRNA [NM_020047]	GO:0003674(molecular_function)|GO:0005615(extracellular space)|GO:0005634(nucleus)|GO:0005886(plasma membrane)|GO:0009925(basal plasma membrane)|GO:0010633(negative regulation of epithelial cell migration)|GO:0016020(membrane)|GO:0016021(integral to membrane)|GO:0016328(lateral plasma membrane)|GO:0051497(negative regulation of stress fiber assembly)|GO:0090191(negative regulation of branching in…	GCAAATACAAAAAGGTGGAGCTTAAGGAGCTGGGGGAGATGAGAAGCGAACCTAGCTTGT	60.8816	86.9	11.2	46.3	19.2	31.9	46.3	33	144	87	69.1	37	25	62.7	49.6	34.5	12.8571	1.87905	7.3681	0.146148
A_30_P01020100			chr2:116802549-116803286_R	lincRNA:chr2:116802549-116803286 reverse strand		AGAGGCCAGTGGTGTTCAAAATGCAGGAAGTAAAAGAAACATAGGAGCAATTCCCTTGCA	50.0022	24.2	11.1	21	18.4	35	80.6	34.9	121	73.1	80.7	37.7	24.5	84.1	238	35.3	10.9009	3.48095	7.19093	0.319327
A_55_P2096134						ATCACGAATGGGGAGTATGGGGGATCACAGATGGAGAGCATGGGGGATCACGGATGGGGA	58.101	58.1	13.9	41.5	19.6	63.6	69	48.3	175	67.9	77.4	37.9	26.3	76.9	76.5	19.1	12.5899	1.63614	7.11304	0.129957
A_30_P01032818			chr12:33606225-33638225_R	lincRNA:chr12:33606225-33638225 reverse strand		ATTCGAGAAACTGTCAGAAACTGAGAATCACCTCAGAACACGCTGAGAAGGAGAGCTAAG	18.4603	28	8.79	19.8	41	60.5	43.8	26.5	65.7	132	54.5	44.2	42.3	36.3	35.6	19.6	7.4744	6.66667	7.07053	0.891933
A_55_P2327853	4931431B13Rik	RIKEN cDNA 4931431B13 gene	gb|AK016494|riken|4931431B13|nap|NAP073308-1	Mus musculus adult male testis cDNA, RIKEN full-length enriched library, clone:4931431B13 product:unclassifiable, full insert sequence. [AK016494]		GGGGAGAGAGAGTGAGGGAGTAGGATGTGTAAATACATTACTCATGTATGAAATTATCAA	77.7652	157	13.9	72.6	44.7	63.6	98.5	78	169	142	200	65.7	25.3	81.4	77.2	16.5	12.1583	1.95592	7.0571	0.160872
A_66_P135061	Nudt15	nudix (nucleoside diphosphate linked moiety X)-type motif 15	ref|NM_172527|ens|ENSMUST00000042061|ens|ENSMUST00000043813|gb|AK040749	Mus musculus nudix (nucleoside diphosphate linked moiety X)-type motif 15 (Nudt15), mRNA [NM_172527]	GO:0000302(response to reactive oxygen species)|GO:0005575(cellular_component)|GO:0006184(GTP catabolic process)|GO:0006203(dGTP catabolic process)|GO:0008413(8-oxo-7,8-dihydroguanosine triphosphate pyrophosphatase activity)|GO:0009217(purine deoxyribonucleoside triphosphate catabolic process)|GO:0016787(hydrolase activity)|GO:0035539(8-oxo-7,8-dihydrodeoxyguanosine triphosphate pyrophosphatase a…	GATTCGGAGCCGAGGAATATGGAGCCTGAAAAGAATGAAAGTTGGGAGTGGGTTCCATGG	42.9746	39.4	13.2	19.1	14	36.8	71.9	44.1	101	121	53.5	36.7	11.3	56.3	47.2	28.1	7.65152	6.33508	6.9933	0.827951
A_55_P1979242	Kcne2	potassium voltage-gated channel, Isk-related subfamily, gene 2	ref|NM_134110|ens|ENSMUST00000113971|ens|ENSMUST00000047383|gb|AK008619	Mus musculus potassium voltage-gated channel, Isk-related subfamily, gene 2 (Kcne2), mRNA [NM_134110]	GO:0005242(inward rectifier potassium channel activity)|GO:0005244(voltage-gated ion channel activity)|GO:0005249(voltage-gated potassium channel activity)|GO:0005251(delayed rectifier potassium channel activity)|GO:0005267(potassium channel activity)|GO:0005515(protein binding)|GO:0005764(lysosome)|GO:0005886(plasma membrane)|GO:0006810(transport)|GO:0006811(ion transport)|GO:0006813(potassium i…	GTAAGTATCCTTACCACAAAACAGTAGCTATGTGAGATGATACATTAGTCATTCCACAAT	36.1971	140	20	40.6	10.2	19.4	35.7	28.5	133	283	130	215	4.74	7.18	347	305	6.65	6.97044	6.81022	1.04819
A_66_P111352	Rax	retina and anterior neural fold homeobox	ref|NM_013833|ens|ENSMUST00000025396|gb|AK133951|gb|BC024731	Mus musculus retina and anterior neural fold homeobox (Rax), mRNA [NM_013833]	GO:0003677(DNA binding)|GO:0003700(sequence-specific DNA binding transcription factor activity)|GO:0005634(nucleus)|GO:0006351(transcription, DNA-dependent)|GO:0006355(regulation of transcription, DNA-dependent)|GO:0007275(multicellular organismal development)|GO:0007389(pattern specification process)|GO:0007420(brain development)|GO:0021854(hypothalamus development)|GO:0043010(camera-type eye de…	CGGCAGGAATGGGGAGTGAGAAAAATAGGTTGAAGAAACTTTGTAAAGTTAGTTTAAAGT	21.2613	61.9	7.56	34.9	12.4	30.8	46.3	20.6	89.1	58.2	82.5	59.6	25.6	71.3	56.7	17.2	11.7857	1.66762	6.72667	0.141495
A_55_P1977792	Folr1	folate receptor 1 (adult)	ref|NM_001252552|ref|NM_008034|ref|NM_001252553|ref|NM_001252554	Mus musculus folate receptor 1 (adult) (Folr1), transcript variant 1, mRNA [NM_001252552]	GO:0004872(receptor activity)|GO:0005542(folic acid binding)|GO:0005622(intracellular)|GO:0005886(plasma membrane)|GO:0005903(brush border)|GO:0006620(posttranslational protein targeting to membrane)|GO:0008517(folic acid transporter activity)|GO:0015884(folic acid transport)|GO:0016020(membrane)|GO:0031225(anchored to membrane)|GO:0031362(anchored to external side of plasma membrane)|GO:0031526(…	GTGGTGGGGCTCTGACAGCCTCTTTAATAAACCAGACATTCCACATGTGCCTTATGAATT	101.311	144	90.1	141	194	207	166	156	700	788	379	405	203	192	729	606	7.76915	5.58865	6.6789	0.719339
A_55_P2066931						CATCCAAACCCCACAACCAACAGGGCAAAACAGAATAATCCAAAAAGAAGTGAATGCTAG	32.022	34.6	6.2	16.4	5.71	36.4	38.3	19	58	64.2	22.4	8.21	18.6	24	31	17.9	9.35484	3.91463	6.63474	0.418461
A_55_P2035927	Ccdc121	coiled-coil domain containing 121	ref|NM_207280|ens|ENSMUST00000058825|gb|AK078370|tc|TC1591202	Mus musculus coiled-coil domain containing 121 (Ccdc121), mRNA [NM_207280]	GO:0003674(molecular_function)|GO:0005575(cellular_component)|GO:0008150(biological_process)	AAGGAACAGAGAGCTTCAAAGACCATGCTGAGCACCAAATCAAAAGCAAGTTCAAAGTAA	25.8489	23.6	6.89	14.5	17.9	26.6	24.2	30.8	63.3	58.3	34.3	11.1	17.5	50.2	105	23	9.18723	4.02069	6.60396	0.437639
A_30_P01022162			chr6:117829576-117834247_F	lincRNA:chr6:117829576-117834247 forward strand		ACGAAAAGGAGAGTGACAGCCGAGTTCTCACAGGAGTGAAGCCACGTGGCGCCGGAGAGC	11.121	31.8	9.1	23.4	11	28.2	24.2	22.5	98.2	54.7	33.6	28.6	17.8	30.4	58.1	11.7	10.7912	2.33761	6.56441	0.216621
A_30_P01020879			chr9:96635508-96654148_F	lincRNA:chr9:96635508-96654148 forward strand		AATGAAGAACACACAGAAAATAGACGCTCACTCGGGAGGTGACTTGAGAAGCCAGAAGAA	29.1674	24	8.21	21.2	6.19	43.8	44	17.4	69.6	92.6	27.9	30.3	63.3	26.8	36.1	9.11	8.47747	4.36792	6.4227	0.515239
A_30_P01017527			chr4:3406175-3443875_F	lincRNA:chr4:3406175-3443875 forward strand		AGGGAAAAGTGATGCGAGGAGAGATGTAATAGCCACCATTGTCCAGACTTCTAATTTTGT	42.2579	25.6	13.1	52.7	20.1	58.6	118	61.6	146	89.5	82.6	30.7	41.8	112	97.7	37.6	11.145	1.69829	6.42167	0.152381
A_51_P483576			gb|AF138742|gb|BC046910|tc|TC1616968|nap|NAP092800-001	Mus musculus immunoglobulin J-C lambda 3 cluster mRNA sequence. [AF138742]		CTGCCAAGTTACACATGAAGGGGACACTGTGGAGAAGAGTCTGTCTCCTGCAGAATGTCT	28.5504	37	15.5	23.5	10.3	22.9	33.2	39.3	158	59.5	23	34.4	23.2	25.1	28.5	23.4	10.1935	2.53191	6.36273	0.248384
A_55_P1969201						TTGAGTGGAATACCAAGGAGAGCAAAGAATATGCAGAAGAGACGGGCGGCCATGGTCTGC	45.6059	40.3	4.98	31.2	12.2	28.1	63.7	37.3	54.3	56.5	28.3	28.8	16.8	55.7	39.9	27.3	10.9036	1.8109	6.35726	0.166082
A_51_P375754	Hoxc10	homeobox C10	ref|NM_010462|ens|ENSMUST00000001699|gb|AK033186|gb|BC053405	Mus musculus homeobox C10 (Hoxc10), mRNA [NM_010462]	GO:0000978(RNA polymerase II core promoter proximal region sequence-specific DNA binding)|GO:0001077(RNA polymerase II core promoter proximal region sequence-specific DNA binding transcription factor activity involved in positive regulation of transcription)|GO:0001501(skeletal system development)|GO:0003677(DNA binding)|GO:0003700(sequence-specific DNA binding transcription factor activity)|GO:0…	GGAAAGAAAGGGGGATAATCAAACAGAGAGGGTCTGTAACCTTGTAGAGCACAGTTAGCA	85.9475	67.1	16.9	34.7	2.25	41.4	68.6	51.7	173	84.5	112	55.2	42.9	56	68	43.8	10.2367	2.43516	6.33592	0.237885
A_52_P499158	Tex101	testis expressed gene 101	ref|NM_019981|ens|ENSMUST00000078001|gb|AK005769|gb|AB022914	Mus musculus testis expressed gene 101 (Tex101), mRNA [NM_019981]	GO:0002080(acrosomal membrane)|GO:0002696(positive regulation of leukocyte activation)|GO:0005886(plasma membrane)|GO:0016020(membrane)|GO:0031225(anchored to membrane)|GO:0045121(membrane raft)|GO:0050731(positive regulation of peptidyl-tyrosine phosphorylation)|GO:0051281(positive regulation of release of sequestered calcium ion into cytosol)	GGGTGGGGTGTGAAGAGCAGAGAAAGAGGATGCATGTGTATTTGACACAATAAAATTAGT	144.209	86.6	17.2	51	20.1	60.2	88.5	88.4	181	104	74.2	61	65.6	120	77.3	60.3	10.5233	2.03922	6.28124	0.193782
A_30_P01031608			chr18:46646048-46659873_F	lincRNA:chr18:46646048-46659873 forward strand		GCACAAGACAGGGAAAGCTAAAAATAAATGACAAAAAATACCACCCCAAACGAAGAGGCT	59.7199	48.6	12.2	21.6	16.7	41.3	61.1	21.1	114	65	47.8	72.8	29.9	60.4	67.9	22.5	9.34426	3.00926	6.17676	0.322044
A_51_P351015	Lta	lymphotoxin A	ref|NM_010735|ens|ENSMUST00000025266|gb|AK156659|gb|AK080308	Mus musculus lymphotoxin A (Lta), mRNA [NM_010735]	GO:0002876(positive regulation of chronic inflammatory response to antigenic stimulus)|GO:0002925(positive regulation of humoral immune response mediated by circulating immunoglobulin)|GO:0005125(cytokine activity)|GO:0005164(tumor necrosis factor receptor binding)|GO:0005576(extracellular region)|GO:0005615(extracellular space)|GO:0006927(transformed cell apoptotic process)|GO:0006954(inflammato…	AGGGGAAAAATAGAAAGCCGTCAGATGACAACTAGGTCCCAGACACAAAGGTGTCTCACC	63.6586	98	11.5	39.8	27.9	49.1	64.4	32.6	123	65.3	63.6	51.4	30.7	57.8	63.4	39.6	10.6957	1.6407	6.16818	0.153399
A_30_P01030479			chr4:119967625-119978325_F	lincRNA:chr4:119967625-119978325 forward strand		TGTGAGCATCTGGGTTTGAGGATGTGGGGAGGACAGGGATGAGGGCAAGGAGCCTCGGGC	60.7089	55.4	14.9	28.3	38	53.4	101	54	145	58.7	76.5	34.3	25.5	75.4	81	34.1	9.73154	2.0742	5.90287	0.213142
A_30_P01021198			chr8:35143801-35144482_F	lincRNA:chr8:35143801-35144482 forward strand		ATCTAGGAATGAGGAAGGAGGCTGGAGGATTTAACAGTGAGGTAGCGGATCTACAAATAC	50.2761	58.5	12.2	27	35	36.2	106	43.5	114	59.1	50.8	15.9	9.26	48.1	29.2	25.9	9.34426	2.18889	5.76658	0.23425
A_30_P01029045			chr17:9943615-9967953_R	lincRNA:chr17:9943615-9967953 reverse strand		CCTCCTGCAACACAATGAACCACACTCACCATTCAATCAAATTACTATATAAATAAGAGA	38.7953	33	20.3	23.3	6.96	26	41.3	33	50.3	209	110	34.5	14.4	18.4	46.3	50.3	2.47783	8.96996	5.72389	3.62008
A_30_P01018192			chr15:41486232-41499767_R	lincRNA:chr15:41486232-41499767 reverse strand		CACGGAAAGCTATGAGAAGACCAAGGAAGGGGAAGCAATGGAAAGCAGTCTCAACCAGCA	65.6375	83.1	19.1	40.2	21.4	94.8	103	51.3	173	93.5	74.1	49.7	30.6	121	106	9.12	9.05759	2.32587	5.69173	0.256787
A_30_P01020978			chr8:128933150-128943375_R	lincRNA:chr8:128933150-128943375 reverse strand		ACTGTTCTGTTCTAGAGCATCAAGTTTGTCTGGAGTCACGCAGGGTATGATGCCAATCTT	0.01	4.66	8.23	27.8	0.488	3.89	20.5	31.2	52.4	135	17.6	20.4	3.71	2.16	14.8	18.4	6.36695	4.85612	5.61153	0.762707
A_55_P2171683						ATGCAAGAGCTAGAAAGAGGGAAAGGGAGGGGCAGGGGGAGGAAGAGAAGGAAGAGAGGA	83.448	147	38.1	114	31.8	99.5	111	78.2	361	180	169	97.1	117	184	109	82.1	9.47507	1.57895	5.52701	0.166642
A_30_P01019596			chr4:8606650-8614031_R	lincRNA:chr4:8606650-8614031 reverse strand		AGAAAAGGCACAGCAATCATCCATCTAAAAGGGTAAACCAGAGTCAAGTCAGAGGGGTCT	30.316	18.2	21.5	7.58	3.34	40.3	49	8.57	76.7	56.5	11.8	9.81	13.9	37.5	35.9	0.01	3.56744	7.45383	5.51063	2.0894
A_30_P01022776			chr10:39383665-39442690_F	lincRNA:chr10:39383665-39442690 forward strand		CCGAAGAACCACATTCCAAGTAAGAAAGGAACTGTTTGCCAGTAAGAACTTACTTCTAAG	6.07745	0.01	28.4	15.7	5.35	3.25	12.7	6.43	105	110	25.7	0.01	27.1	17.2	31.4	2.63	3.69718	7.00637	5.35178	1.89506
A_30_P01018019			chr10:117021051-117038683_F	lincRNA:chr10:117021051-117038683 forward strand		GAGTGTGAGATTTGTCGGGCAAGCCCAGGGAGTGAGGCGCTAACTGTCACCAATGCATGA	65.1417	62.6	6.13	25	27.2	39.6	27.4	33.7	51.3	56.3	21	16.3	33.1	48.3	43.5	37	8.36868	2.252	5.31034	0.269099
A_51_P404463	1500015O10Rik	RIKEN cDNA 1500015O10 gene	ref|NM_024283|ens|ENSMUST00000027217|gb|AK049805|gb|AK018770	Mus musculus RIKEN cDNA 1500015O10 gene (1500015O10Rik), mRNA [NM_024283]	GO:0003674(molecular_function)|GO:0005576(extracellular region)|GO:0005615(extracellular space)|GO:0008054(cyclin catabolic process)|GO:0031410(cytoplasmic vesicle)|GO:0070314(G1 to G0 transition)|GO:0090398(cellular senescence)	CAGGCTAAAGGAAAGAATATAAGTGCTTTTTGCATTTCATGCATGTGCTTAACGATATGT	471.206	630	196	235	294	362	298	341	900	1410	546	733	1600	1760	1130	990	4.59184	6	5.29592	1.30667
A_55_P2123616	Gm5127	predicted gene 5127	ref|NM_001033541|gb|AK142438|ens|ENSMUST00000101297|tc|TC1591130	Mus musculus predicted gene 5127 (Gm5127), mRNA [NM_001033541]	GO:0003674(molecular_function)|GO:0004871(signal transducer activity)|GO:0004930(G-protein coupled receptor activity)|GO:0005575(cellular_component)|GO:0007165(signal transduction)|GO:0007186(G-protein coupled receptor signaling pathway)|GO:0008150(biological_process)|GO:0016020(membrane)|GO:0016021(integral to membrane)	GTATATATGGGAGATACTGGAGAGAAAGGAGGGGAAATACTGTAATCATATTATAATTCC	14.1978	36.6	17.1	46	6.2	29.2	54.5	23.5	150	76.7	39.3	25.3	32.6	56.7	31.2	27.5	8.77193	1.66739	5.21966	0.190083
A_30_P01019652			chr1:92412246-92423471_F	lincRNA:chr1:92412246-92423471 forward strand		AGGGGGAGACTTGGCTCAGAGACTGGAAACAGAAATGATAAGCGAAGTGATGCTTAATTA	52.581	75.8	16.3	31.8	20	47	59.1	57	141	55.3	35	29.7	20.9	64.7	46.6	12.7	8.65031	1.73899	5.19465	0.201033
A_55_P1976267			gb|AW475325	un64e01.y1 Sugano mouse kidney mkia Mus musculus cDNA clone IMAGE:2503416 5'. [AW475325]		CAAAACACCTCAGAGTCCAAGGTCTGGAACAGAGACAGTGAAAAACAAAGCCAAGTTGAG	24.035	13.5	17.6	16.5	6.85	25.5	19.8	4.92	62.3	112	7.52	11	10.3	36.6	15.2	9.36	3.53977	6.78788	5.16383	1.9176
A_55_P2056735	Col16a1	collagen, type XVI, alpha 1	ref|NM_028266|ens|ENSMUST00000106001|ens|ENSMUST00000151541|ens|ENSMUST00000129937	Mus musculus collagen, type XVI, alpha 1 (Col16a1), mRNA [NM_028266]	GO:0005178(integrin binding)|GO:0005576(extracellular region)|GO:0005578(proteinaceous extracellular matrix)|GO:0005581(collagen)|GO:0007155(cell adhesion)|GO:0071230(cellular response to amino acid stimulus)	TTCTGGAGAAAGGAGAAAAGGGGGACCAGGGCATCCCTGGCGTGCCAGGTTTTGACAACT	34.0825	24.5	12.4	16.5	14.5	25.4	41.5	48	83	59.1	93.4	29.2	46.5	68.3	63	37	6.69355	3.58182	5.13768	0.535115
A_30_P01030866			chr1:15839444-15840383_R	lincRNA:chr1:15839444-15840383 reverse strand		ATAAGTAGGCTATTCAGAAGGAGGTGAGGAAGAAGGAAGACTCCCCAAACAGGTACCTAA	35.5721	64.3	18.2	24.6	25.8	50	84.5	52.1	134	68.6	71.4	35.8	44.7	45.1	55.9	32	7.36264	2.78862	5.07563	0.378753
A_55_P1969246						CAACAGAAGGGGATGGGAGCAGTGGAGTCTAAAGCTACAATGAAAAGCACTGCATATTAA	58.2629	61	13.3	32	13.3	37.5	56.9	35.8	110	58.6	40.4	30.5	15.9	54.5	27.8	22.1	8.27068	1.83125	5.05096	0.221415
A_30_P01032933			chr8:128933150-128943375_F	lincRNA:chr8:128933150-128943375 forward strand		GGAAAAGAAATGGAAGAGATAGAAACTACAGGGTTAAGTGTCTACTAAGTGAGTGTGGGC	49.4708	6.28	9.92	19.7	7.83	30	42.8	19.4	71.6	52.9	37	15.5	12.2	35.3	37.4	24	7.21774	2.68528	4.95151	0.372039
A_55_P2002954						AGGAAGGATAAAAGGGAATATAGCTTCTTCTTCGGGAAAACACCAAAAGGCGGATGACGC	33.0326	38.5	17.5	34.7	16	51.7	36.2	26.2	132	79.2	51	33	35.6	58.9	33.5	44.8	7.54286	2.28242	4.91264	0.302594
A_52_P367760	Calml4	calmodulin-like 4	ref|NM_138304|ref|NM_001102468|ens|ENSMUST00000034777|ens|ENSMUST00000163820	Mus musculus calmodulin-like 4 (Calml4), transcript variant 1, mRNA [NM_138304]	GO:0005509(calcium ion binding)	AAACTGGGAGAGAAGCTCACTCACAAGGAAGTGGATGATCTTTTCAAGGAAGCAGGCATT	66.5383	55.7	21	31	42.4	75.1	41.4	29	114	133	45.4	60.5	75.2	90	104	67.9	5.42857	4.29032	4.85945	0.790323
A_30_P01024519			chr3:38324807-38342556_R	lincRNA:chr3:38324807-38342556 reverse strand		CACCAGAGCTGGTGTAGGCTATGAAGAACATCTCTGAAGCCTGAAGTCCAAATTCAAAAG	6.92495	8.09	14	8.95	5.46	32	11.1	12.2	50.8	54.4	26.8	38.5	27.5	20	13.7	24.9	3.62857	6.07821	4.85339	1.6751
A_30_P01024271			chr6:86477309-86537554_F	lincRNA:chr6:86477309-86537554 forward strand		TACAGGAGTCAAGGAAGCAGGAAGTGGGAGGACCCTGAACGCCTGAGAATGACCTCTGAC	55.4892	56.5	20	37.7	19.6	45.1	50.8	25.9	149	81.2	54.8	30.6	42.4	61.5	63.3	56.5	7.45	2.15385	4.80192	0.289107
A_30_P01028712			chr8:49853937-49874087_F	lincRNA:chr8:49853937-49874087 forward strand		ATAAGGAATGAGAAAGGAAGAAAGGGAGAAATATCACGTCAACAACTCCGCCCAGAGCCA	34.0895	32.1	21.9	19.1	26.4	28.1	65.8	43.9	131	69.1	81	37.2	42	102	92.2	41.2	5.98174	3.6178	4.79977	0.604808
A_55_P2058602						ACTCATGAACAACGAACAACCATGAAACAGAACAGAACAGAACAGTCCCACTTCTCGAGG	40.3625	34.7	11.1	27.6	27.6	49.4	78.4	43.2	80.1	63	44.9	56.6	47.1	44.4	79.1	59.5	7.21622	2.28261	4.74941	0.316317
A_30_P01022110			chr5:31862823-31871445_F	lincRNA:chr5:31862823-31871445 forward strand		AAGTCAGGGGAGATAAGAAGTCAAGAGTGCCCATCAGAATGTGAAGGGTCACAAGCAAAT	32.8086	52.9	22.1	35.4	18.5	38.8	47.2	43.2	163	73.4	67.9	34.6	39.7	81.7	105	29.7	7.37557	2.07345	4.72451	0.281124
A_55_P2016462	Cxcl10	chemokine (C-X-C motif) ligand 10	ref|NM_021274|ens|ENSMUST00000038816|gb|AF227743|gb|AK151534	Mus musculus chemokine (C-X-C motif) ligand 10 (Cxcl10), mRNA [NM_021274]	GO:0002690(positive regulation of leukocyte chemotaxis)|GO:0005125(cytokine activity)|GO:0005576(extracellular region)|GO:0005615(extracellular space)|GO:0005623(cell)|GO:0006935(chemotaxis)|GO:0006954(inflammatory response)|GO:0006955(immune response)|GO:0007165(signal transduction)|GO:0008009(chemokine activity)|GO:0008284(positive regulation of cell proliferation)|GO:0009306(protein secretion)…	GCTTTGCATTGTATATGGAAGAACTTGTGTCATCAAGTATGTATCAATGGGTAGTTAAAG	18.6011	35.2	45.5	81.5	38.6	55.3	58.4	67	197	409	23.3	48.6	2130	2490	113	116	4.32967	5.0184	4.67404	1.15907
A_30_P01022616			chr17:27445260-27455641_R	lincRNA:chr17:27445260-27455641 reverse strand		GCAAAAAGGCCAGGAGCTGCAGGAAAGCATTCGTGGGTGCCGATGATAGCTGAGCTCTGA	41.16	32.1	12.4	32.7	0.336	23.7	40	17.9	95.3	52.9	61.7	28.6	160	57.4	52.8	25.7	7.68548	1.61774	4.65161	0.210493
A_30_P01019135			chr19:5771425-5848475_F	lincRNA:chr19:5771425-5848475 forward strand		TGAGACCACAGAAGAGGAAGCACGGAACCTAGGCAAAGTCCAGAGAGGGCACTGCTATCT	52.9561	53.5	22	46.4	30.9	75.1	70.4	55	168	77.2	74.4	51.9	66.9	122	138	62.5	7.63636	1.66379	4.65008	0.217878
A_52_P434055	Birc3	baculoviral IAP repeat-containing 3	gb|BC011338|tc|TC1589149	Mus musculus baculoviral IAP repeat-containing 3, mRNA (cDNA clone MGC:18386 IMAGE:3661563), complete cds. [BC011338]	GO:0004842(ubiquitin-protein ligase activity)|GO:0005515(protein binding)|GO:0005622(intracellular)|GO:0005634(nucleus)|GO:0005737(cytoplasm)|GO:0006915(apoptotic process)|GO:0008270(zinc ion binding)|GO:0016567(protein ubiquitination)|GO:0016874(ligase activity)|GO:0042326(negative regulation of phosphorylation)|GO:0042981(regulation of apoptotic process)|GO:0043234(protein complex)|GO:0045121(m…	ACAGATAATGCCCAGCTAATAGAACAGGGTCTGAAGGAGAACGTGAAGAGACAACTGTCT	36.4743	64.3	17.2	21.1	14.8	44.5	39.1	30.1	103	68.1	40.1	26.2	23.1	50.5	60.3	11.7	5.98837	3.22749	4.60793	0.538959
A_55_P2101402						CCTTCACGCAGCAAGCCACAAACAATAAGAGCAAGGGGAAGAAGCCAAAGCCGACACCGG	79.3398	103	21.8	42.2	33.5	64.3	63.5	30.9	160	75.6	72.1	53.3	47.5	96	59.8	41.6	7.33945	1.79147	4.56546	0.244088
A_55_P2097967			tc|TC1731287			AAGACGTGAGAGGAGGCACACTTGCGCTACCAGAAAATAAAGATGCTTGTTAACTGTACA	22.6225	30.4	15.2	25.1	22.8	23.1	38.8	26.1	99.3	64.5	43.8	28	24.3	58	62.3	19.1	6.53289	2.56972	4.55131	0.393351
A_51_P293015	Il25	interleukin 25	ref|NM_080729|ens|ENSMUST00000037863|gb|BC120568|gb|BC125524	Mus musculus interleukin 25 (Il25), mRNA [NM_080729]	GO:0002437(inflammatory response to antigenic stimulus)|GO:0005125(cytokine activity)|GO:0006954(inflammatory response)|GO:0009620(response to fungus)|GO:0009624(response to nematode)|GO:0030222(eosinophil differentiation)|GO:0030380(interleukin-17E receptor binding)|GO:0045944(positive regulation of transcription from RNA polymerase II promoter)	GGGACAAGATGGAGGACTTGGGGAGAAACTCTGACTTTTGCACTTTTTGGAAGCACTTTT	42.4502	44.4	18.3	33.7	28.6	68.6	70.9	51.6	126	73.3	86.2	62.8	32.3	56.4	62	41.1	6.88525	2.17507	4.53016	0.315904
A_30_P01030130			chr15:79764481-79809909_R	lincRNA:chr15:79764481-79809909 reverse strand		ACAGAAAGCAGGAGCAGGTGAAGAACAGGACGGGACGGGAAGCTCTCTGTGTCATCGACT	76.4531	107	43.8	96.5	52.7	91	120	96.1	302	200	138	48.3	57.3	167	67.3	70	6.89498	2.07254	4.48376	0.300587
A_66_P114042	Kctd7	potassium channel tetramerisation domain containing 7	ref|NM_172509|ens|ENSMUST00000040616|gb|AK083583|riken|D030049F10	Mus musculus potassium channel tetramerisation domain containing 7 (Kctd7), mRNA [NM_172509]	GO:0003674(molecular_function)|GO:0005575(cellular_component)|GO:0005737(cytoplasm)|GO:0005886(plasma membrane)|GO:0008150(biological_process)|GO:0016020(membrane)|GO:0051260(protein homooligomerization)	AGCGCAGGAGATGGGGTATGGGGAGTTTATTGGTGTGTGATCCCAGACTGAAATGAACCT	27.9465	42.9	17.1	29.2	26.6	53.3	29.2	36.3	117	57.7	59.5	33.9	38	60.7	65.6	30.3	6.84211	1.97603	4.40907	0.288804
A_30_P01024715			chr9:40029344-40050160_R	lincRNA:chr9:40029344-40050160 reverse strand		AAATGCAAAAACAGTAAGCAGGTGTGACAAGCAAAGGAGACAGAGAAAGGGGAGCGTTAT	47.4807	62.5	21	44.9	11	54.1	98.3	33	141	87.7	70.2	38.7	15	62.3	114	27.1	6.71429	1.95323	4.33376	0.290907
A_52_P474814	4921506M07Rik	RIKEN cDNA 4921506M07 gene	ref|NM_001037743|ens|ENSMUST00000101398|gb|AK014828|gb|BC100489	Mus musculus RIKEN cDNA 4921506M07 gene (4921506M07Rik), mRNA [NM_001037743]	GO:0003674(molecular_function)|GO:0005575(cellular_component)|GO:0008150(biological_process)	GGGTAGACAGAGACGAAAATATCGCAGCTTTTAAATCTCAGGAAACGTTAGACATTGTGC	38.8067	44.6	12.4	15.3	3.25	22.3	22.8	8.94	62.9	54.7	6.81	6.91	8.39	31.7	38.4	0.01	5.07258	3.57516	4.32387	0.704802
A_51_P110301	C3	complement component 3	ref|NM_009778|ens|ENSMUST00000024988|gb|K02782|gb|BC043338	Mus musculus complement component 3 (C3), mRNA [NM_009778]	GO:0001798(positive regulation of type IIa hypersensitivity)|GO:0001934(positive regulation of protein phosphorylation)|GO:0001970(positive regulation of activation of membrane attack complex)|GO:0004866(endopeptidase inhibitor activity)|GO:0005515(protein binding)|GO:0005576(extracellular region)|GO:0005615(extracellular space)|GO:0006629(lipid metabolic process)|GO:0006631(fatty acid metabolic …	ATTCACAGAATCTATGGTGGTTTATGGTTGTCCCAACTGACTACAGCCCAGCCCTCTAAT	393.492	468	224	289	220	266	354	296	1060	1130	383	449	1820	1980	376	324	4.73214	3.91003	4.32109	0.826271
A_30_P01027360			chr15:79286294-79286651_R	lincRNA:chr15:79286294-79286651 reverse strand		GGAACCCTGGAACCCTTAGCAGGGGAGGCTGGGTAGGGGAAAGTTGGGGGATAGGGAGAG	81.6758	77.1	21.4	48.4	34.2	61.7	68.3	49.6	146	87.6	40.7	39.9	60	82.3	97	42.1	6.82243	1.80992	4.31617	0.265289
A_51_P110301	C3	complement component 3	ref|NM_009778|ens|ENSMUST00000024988|gb|K02782|gb|BC043338	Mus musculus complement component 3 (C3), mRNA [NM_009778]	GO:0001798(positive regulation of type IIa hypersensitivity)|GO:0001934(positive regulation of protein phosphorylation)|GO:0001970(positive regulation of activation of membrane attack complex)|GO:0004866(endopeptidase inhibitor activity)|GO:0005515(protein binding)|GO:0005576(extracellular region)|GO:0005615(extracellular space)|GO:0006629(lipid metabolic process)|GO:0006631(fatty acid metabolic …	ATTCACAGAATCTATGGTGGTTTATGGTTGTCCCAACTGACTACAGCCCAGCCCTCTAAT	405.719	459	202	275	227	245	270	309	870	1140	442	497	1860	1980	366	310	4.30693	4.14545	4.22619	0.962508
A_30_P01031443			chr16:13752215-13764390_R	lincRNA:chr16:13752215-13764390 reverse strand		AGAGGGCAGGATTTGGCTTTGAGAGGTCACAGGTACCATAGATAAACTGTCAGGGATCAC	28.3322	29.8	14.6	18.8	4.48	31.3	38.6	37	68.7	68.9	30.6	18.5	2.03	35.7	106	7.66	4.70548	3.66489	4.18519	0.778857
A_30_P01028104			chr1:137679100-137689925_R	lincRNA:chr1:137679100-137689925 reverse strand		AGTTTCCCATGGGGATTGCAGGTCCAGGACGGTGGGAGGAGTGAGGGAGCTGCAAGCAGA	21.6516	47.1	11.8	27.4	20.1	39.4	35.8	20.9	77	50.5	45.4	23.5	18	53.9	34.8	20.5	6.52542	1.84307	4.18424	0.282444
A_51_P110301	C3	complement component 3	ref|NM_009778|ens|ENSMUST00000024988|gb|K02782|gb|BC043338	Mus musculus complement component 3 (C3), mRNA [NM_009778]	GO:0001798(positive regulation of type IIa hypersensitivity)|GO:0001934(positive regulation of protein phosphorylation)|GO:0001970(positive regulation of activation of membrane attack complex)|GO:0004866(endopeptidase inhibitor activity)|GO:0005515(protein binding)|GO:0005576(extracellular region)|GO:0005615(extracellular space)|GO:0006629(lipid metabolic process)|GO:0006631(fatty acid metabolic …	ATTCACAGAATCTATGGTGGTTTATGGTTGTCCCAACTGACTACAGCCCAGCCCTCTAAT	398.171	437	208	259	224	269	243	302	822	1130	351	423	1790	1920	370	364	3.95192	4.36293	4.15743	1.104
A_30_P01029104			chr6:134879009-134880130_F	lincRNA:chr6:134879009-134880130 forward strand		GAGCAGTCCATGAGGAAAACCACATCCCTGGAAGGAGGAAGCTAGTCTCAGAAACAGGTC	29.5402	58.5	18.1	22.9	33	53	112	85.2	95.8	69.2	22.4	26.4	23	88.4	104	69.1	5.29282	3.02183	4.15733	0.570931
A_51_P438967	Gpnmb	glycoprotein (transmembrane) nmb	ref|NM_053110|ens|ENSMUST00000031840|gb|AK149740|gb|AK159270	Mus musculus glycoprotein (transmembrane) nmb (Gpnmb), mRNA [NM_053110]	GO:0005178(integrin binding)|GO:0005886(plasma membrane)|GO:0005887(integral to plasma membrane)|GO:0007155(cell adhesion)|GO:0008201(heparin binding)|GO:0016020(membrane)|GO:0016021(integral to membrane)|GO:0016023(cytoplasmic membrane-bounded vesicle)|GO:0031410(cytoplasmic vesicle)	TGGGAACTGTTGTTCTCTAAGGATTATTGTAAAATGTATATCGTGGCTTAGGGAGTGTGG	89.9285	142	25.9	49.6	62.6	82.1	73.9	127	138	146	99.8	137	11900	14000	59.8	87.5	5.32819	2.94355	4.13587	0.552449
A_55_P1995580	Mcpt9	mast cell protease 9	ref|NM_010782|ens|ENSMUST00000095798|gb|AY007568|tc|TC1589315	Mus musculus mast cell protease 9 (Mcpt9), mRNA [NM_010782]	GO:0003824(catalytic activity)|GO:0004252(serine-type endopeptidase activity)|GO:0005622(intracellular)|GO:0006508(proteolysis)|GO:0008233(peptidase activity)|GO:0008236(serine-type peptidase activity)|GO:0016787(hydrolase activity)	ACGTTGGAGCTATAAAAGCAGGAACCAGGACAAGAACACACCAAAATCTCTCTCCAGACT	39.9652	54.1	15.3	38.3	28.1	56.4	105	67.4	103	57.7	46.4	26.4	23.6	77.9	113	55.2	6.73203	1.50653	4.11928	0.223785
A_55_P2117818	Pigu	phosphatidylinositol glycan anchor biosynthesis, class U	gb|AK162913|riken|A330029E17	Mus musculus adult male spinal cord cDNA, RIKEN full-length enriched library, clone:A330029E17 product:PIG-U homolog [Rattus norvegicus], full insert sequence. [AK162913]	GO:0003923(GPI-anchor transamidase activity)|GO:0005783(endoplasmic reticulum)|GO:0005789(endoplasmic reticulum membrane)|GO:0005886(plasma membrane)|GO:0006506(GPI anchor biosynthetic process)|GO:0016020(membrane)|GO:0016021(integral to membrane)|GO:0016255(attachment of GPI anchor to protein)|GO:0034235(GPI anchor binding)|GO:0042765(GPI-anchor transamidase complex)|GO:0046425(regulation of JAK…	CTCATATACACAAAGAGGACGAAAAGGAGGAAGAAAGAAAAGAGGTCCACTTACACTGAG	32.8719	53.9	17.1	35.3	32.4	36.3	65.2	41.3	110	63.5	51.4	35.1	29.7	88.3	73	32.1	6.43275	1.79887	4.11581	0.279642
A_30_P01021469			chr7:134620707-134626739_F	lincRNA:chr7:134620707-134626739 forward strand		AAACAGAGAGCAGGAAGAGGCGGGTGGCCTAAGGAACTGCTCCAAACACCTACTTCGGAC	39.9881	43.1	20.5	44	26.7	46.8	66.8	40.8	134	73.4	56.7	36.5	39.6	60.9	69.3	36.8	6.53659	1.66818	4.10238	0.255207
A_55_P2044528			ens|ENSMUST00000101556|gb|AK028130|gb|AV078501|tc|TC1593451	membrane associated guanylate kinase, WW and PDZ domain containing 2 [Source:MGI Symbol;Acc:MGI:1354953] [ENSMUST00000101556]		AAGCTCACACATCAGTTTCAGAGAAGAGGGGCAGGAAGTAGGAAATCAAGCACTATTTGA	47.311	79.6	15.9	37.4	8.56	51.5	66.7	59.8	103	62.6	56.1	70.6	30.6	73.3	60	23	6.47799	1.6738	4.07589	0.258382
A_51_P110301	C3	complement component 3	ref|NM_009778|ens|ENSMUST00000024988|gb|K02782|gb|BC043338	Mus musculus complement component 3 (C3), mRNA [NM_009778]	GO:0001798(positive regulation of type IIa hypersensitivity)|GO:0001934(positive regulation of protein phosphorylation)|GO:0001970(positive regulation of activation of membrane attack complex)|GO:0004866(endopeptidase inhibitor activity)|GO:0005515(protein binding)|GO:0005576(extracellular region)|GO:0005615(extracellular space)|GO:0006629(lipid metabolic process)|GO:0006631(fatty acid metabolic …	ATTCACAGAATCTATGGTGGTTTATGGTTGTCCCAACTGACTACAGCCCAGCCCTCTAAT	345.62	469	233	275	204	264	237	286	875	1200	388	456	1800	2090	350	352	3.75536	4.36364	4.0595	1.16197
A_51_P324814	Krt18	keratin 18	ref|NM_010664|ens|ENSMUST00000023803|gb|AK167072|gb|AK167265	Mus musculus keratin 18 (Krt18), mRNA [NM_010664]	GO:0005198(structural molecule activity)|GO:0005515(protein binding)|GO:0005634(nucleus)|GO:0005737(cytoplasm)|GO:0005815(microtubule organizing center)|GO:0005882(intermediate filament)|GO:0033209(tumor necrosis factor-mediated signaling pathway)|GO:0034451(centriolar satellite)|GO:0043000(Golgi to plasma membrane CFTR protein transport)|GO:0043066(negative regulation of apoptotic process)|GO:00…	GGATGGCAGAGTGGTGTCCGAGACTAATGACACCAGAGTTCTGAGGCACTGAGGCAGAGA	97.5669	125	34.8	33.9	56.8	69.2	55.7	51	128	150	80.8	158	79.1	100	220	163	3.67816	4.42478	4.05147	1.20299
A_30_P01021627			chr1:182686731-182709331_F	lincRNA:chr1:182686731-182709331 forward strand		TCCCTATGTCAAAGAAGGGGAAGGGGAGGGGAGGATGAGGGTCAGAAAGATGGCTTAGAC	79.5596	55.5	21.1	47.1	38.6	54.5	95.6	45.4	126	99.2	89.9	42.4	103	66.9	134	30.8	5.97156	2.10616	4.03886	0.352698
A_65_P16208	Baz1a	bromodomain adjacent to zinc finger domain 1A	ref|NM_013815|ens|ENSMUST00000173433|ens|ENSMUST00000038926|gb|AK047427	Mus musculus bromodomain adjacent to zinc finger domain 1A (Baz1a), mRNA [NM_013815]	GO:0000228(nuclear chromosome)|GO:0005515(protein binding)|GO:0005634(nucleus)|GO:0006261(DNA-dependent DNA replication)|GO:0006338(chromatin remodeling)|GO:0006351(transcription, DNA-dependent)|GO:0006355(regulation of transcription, DNA-dependent)|GO:0008270(zinc ion binding)|GO:0008623(chromatin accessibility complex)|GO:0046872(metal ion binding)	GCATAGTGAATCTAAGAGAAGAGGCAGGAAAAGACAATCTACAGAGTCATCTCCTGTACC	32.1763	38.9	17.6	42.2	22.7	57.9	68.3	35.6	114	67.3	49.7	9.25	82.2	77.7	37.7	14.8	6.47727	1.59479	4.03603	0.246213
A_51_P271865	Clec4f	C-type lectin domain family 4, member f	ref|NM_016751|ens|ENSMUST00000137647|ens|ENSMUST00000014686|gb|D88577	Mus musculus C-type lectin domain family 4, member f (Clec4f), mRNA [NM_016751]	GO:0005575(cellular_component)|GO:0006897(endocytosis)|GO:0008150(biological_process)|GO:0016020(membrane)|GO:0016021(integral to membrane)|GO:0030246(carbohydrate binding)	AACTGGAGACATAGGAACGGAGAGCGAGAAGACTGTGTTCACGTCCGGCAGCAGTGGAAT	37.3543	27.4	18.5	32.3	4.17	44.7	69.6	23.9	115	57.7	72.7	14.5	6.45	41.9	34.9	3.43	6.21622	1.78638	4.0013	0.287374
A_55_P2169167	Ccdc13	coiled-coil domain containing 13	ens|ENSMUST00000146716|gb|AK158659|tc|TC1594388|riken|K230045E20	coiled-coil domain containing 13 [Source:MGI Symbol;Acc:MGI:1920144] [ENSMUST00000146716]	GO:0003674(molecular_function)|GO:0005575(cellular_component)|GO:0008150(biological_process)	CCACAGAGAAACCAGACCCCTATGTGTGCAATCACTATGAGAATATTTATAATAAAAAAG	39.0402	38.8	24.7	31.8	25.4	24.5	20.5	28.1	59.4	178	32.9	32.3	145	46.9	25.7	25.5	2.40486	5.59748	4.00117	2.32757
A_51_P110301	C3	complement component 3	ref|NM_009778|ens|ENSMUST00000024988|gb|K02782|gb|BC043338	Mus musculus complement component 3 (C3), mRNA [NM_009778]	GO:0001798(positive regulation of type IIa hypersensitivity)|GO:0001934(positive regulation of protein phosphorylation)|GO:0001970(positive regulation of activation of membrane attack complex)|GO:0004866(endopeptidase inhibitor activity)|GO:0005515(protein binding)|GO:0005576(extracellular region)|GO:0005615(extracellular space)|GO:0006629(lipid metabolic process)|GO:0006631(fatty acid metabolic …	ATTCACAGAATCTATGGTGGTTTATGGTTGTCCCAACTGACTACAGCCCAGCCCTCTAAT	382.644	475	219	288	240	268	235	301	872	1150	382	456	1750	1920	354	328	3.98174	3.99306	3.9874	1.00284
A_55_P2144994	Gm6772	predicted gene 6772	ref|NM_001195767|ens|ENSMUST00000095527	Mus musculus predicted gene 6772 (Gm6772), mRNA [NM_001195767]	GO:0003674(molecular_function)|GO:0005575(cellular_component)|GO:0008150(biological_process)	ACCAGACCAAAGGCCAAAAGGAAAGATGCCATGACCAGACCTAAGTGCGAGAAAATAAAA	60.4624	60.5	11.3	41.8	10.6	62.5	47.1	28.2	70.6	65.4	30.6	22.7	16.2	45.8	32.7	5.07	6.24779	1.56459	3.90619	0.250424
A_52_P290799	Gpr35	G protein-coupled receptor 35	ref|NM_022320|ref|NM_001104529|ref|NM_001271766|ens|ENSMUST00000064480	Mus musculus G protein-coupled receptor 35 (Gpr35), transcript variant 1, mRNA [NM_022320]	GO:0004871(signal transducer activity)|GO:0004930(G-protein coupled receptor activity)|GO:0005886(plasma membrane)|GO:0005887(integral to plasma membrane)|GO:0007165(signal transduction)|GO:0007186(G-protein coupled receptor signaling pathway)|GO:0016020(membrane)|GO:0016021(integral to membrane)	GAAGACGGGAGGTAGAAAATGAAGGACAATCTTTACACAAAAGCTGCAAAATTAGCACAC	53.8432	180	20	25.3	31.5	34.6	74.1	67.6	105	64.2	45.6	15.5	25.7	78	54.6	26.4	5.25	2.53755	3.89377	0.483343
A_30_P01018389			chr3:95460633-95461443_R	lincRNA:chr3:95460633-95461443 reverse strand		CAAAAGACATGGGGAGATAGATGATGGTCCAGCAAGTAAAGACAATTGCTGCCAAACCCT	30.9976	35.4	12.4	17.8	2.43	26.4	27.6	20.7	59.9	52.4	28.8	17	16.7	27.2	7.5	20.5	4.83065	2.94382	3.88723	0.609405
A_51_P110301	C3	complement component 3	ref|NM_009778|ens|ENSMUST00000024988|gb|K02782|gb|BC043338	Mus musculus complement component 3 (C3), mRNA [NM_009778]	GO:0001798(positive regulation of type IIa hypersensitivity)|GO:0001934(positive regulation of protein phosphorylation)|GO:0001970(positive regulation of activation of membrane attack complex)|GO:0004866(endopeptidase inhibitor activity)|GO:0005515(protein binding)|GO:0005576(extracellular region)|GO:0005615(extracellular space)|GO:0006629(lipid metabolic process)|GO:0006631(fatty acid metabolic …	ATTCACAGAATCTATGGTGGTTTATGGTTGTCCCAACTGACTACAGCCCAGCCCTCTAAT	396.882	459	243	258	247	298	278	291	831	1120	364	413	1790	1910	375	333	3.41975	4.34109	3.88042	1.26941
A_52_P151839	Ttc26	tetratricopeptide repeat domain 26	ref|NM_153600|ens|ENSMUST00000162554|ens|ENSMUST00000159145|gb|AK035185	Mus musculus tetratricopeptide repeat domain 26 (Ttc26), mRNA [NM_153600]	GO:0003674(molecular_function)|GO:0005622(intracellular)|GO:0005623(cell)|GO:0005813(centrosome)|GO:0005929(cilium)|GO:0008594(photoreceptor cell morphogenesis)|GO:0030030(cell projection organization)|GO:0030992(intraflagellar transport particle B)|GO:0036064(cilium basal body)|GO:0042073(intraflagellar transport)|GO:0042384(cilium assembly)|GO:0042995(cell projection)|GO:0046530(photoreceptor c…	GAGAGCTTTGGAGGAATATGAAAATGCAACGAAGGAGGAAAATTGCAATCCAGAAGTGTG	36.2793	35.1	17.7	28.4	12.8	10.1	32.3	25.6	94.4	68.9	40.9	27.4	11.4	33.1	40.5	7.98	5.33333	2.42606	3.87969	0.454886
A_66_P138319	Acox2	acyl-Coenzyme A oxidase 2, branched chain	ref|NM_053115|ref|NM_001161667|ens|ENSMUST00000164598|ens|ENSMUST00000022271	Mus musculus acyl-Coenzyme A oxidase 2, branched chain (Acox2), transcript variant 1, mRNA [NM_053115]	GO:0003995(acyl-CoA dehydrogenase activity)|GO:0003997(acyl-CoA oxidase activity)|GO:0005102(receptor binding)|GO:0005504(fatty acid binding)|GO:0005777(peroxisome)|GO:0006629(lipid metabolic process)|GO:0006631(fatty acid metabolic process)|GO:0006635(fatty acid beta-oxidation)|GO:0008152(metabolic process)|GO:0016491(oxidoreductase activity)|GO:0016627(oxidoreductase activity, acting on the CH-…	TGGCGTGCGGCTTGTTCAGATCAGCGAGTAAACTGGTACATGAAAGGATGTTCATCATAT	44.8104	61.1	17.5	41.6	22.7	40.6	29	35	102	78.8	7.77	28.2	28.8	39.2	44.9	36.8	5.82857	1.89423	3.8614	0.324991
A_51_P110301	C3	complement component 3	ref|NM_009778|ens|ENSMUST00000024988|gb|K02782|gb|BC043338	Mus musculus complement component 3 (C3), mRNA [NM_009778]	GO:0001798(positive regulation of type IIa hypersensitivity)|GO:0001934(positive regulation of protein phosphorylation)|GO:0001970(positive regulation of activation of membrane attack complex)|GO:0004866(endopeptidase inhibitor activity)|GO:0005515(protein binding)|GO:0005576(extracellular region)|GO:0005615(extracellular space)|GO:0006629(lipid metabolic process)|GO:0006631(fatty acid metabolic …	ATTCACAGAATCTATGGTGGTTTATGGTTGTCCCAACTGACTACAGCCCAGCCCTCTAAT	381.09	481	221	293	238	260	257	280	851	1120	373	435	1850	2010	341	337	3.85068	3.82253	3.8366	0.992689
A_51_P399845	Fgf2	fibroblast growth factor 2	ref|NM_008006|ens|ENSMUST00000038885|ens|ENSMUST00000138563|gb|AY027551	Mus musculus fibroblast growth factor 2 (Fgf2), mRNA [NM_008006]	GO:0000186(activation of MAPKK activity)|GO:0000189(MAPK import into nucleus)|GO:0001525(angiogenesis)|GO:0001658(branching involved in ureteric bud morphogenesis)|GO:0001759(organ induction)|GO:0001934(positive regulation of protein phosphorylation)|GO:0001938(positive regulation of endothelial cell proliferation)|GO:0002042(cell migration involved in sprouting angiogenesis)|GO:0005102(receptor …	AGCGACCCACACGTCAAACTACAACTCCAAGCAGAAGAGAGAGGAGTTGTGTCTATCAAG	30.2308	42	14.4	31.8	5.44	33.7	57.9	50.9	81.6	63.6	20.1	15.2	10.3	52.4	55.8	14.9	5.66667	2	3.83333	0.352941
A_51_P110301	C3	complement component 3	ref|NM_009778|ens|ENSMUST00000024988|gb|K02782|gb|BC043338	Mus musculus complement component 3 (C3), mRNA [NM_009778]	GO:0001798(positive regulation of type IIa hypersensitivity)|GO:0001934(positive regulation of protein phosphorylation)|GO:0001970(positive regulation of activation of membrane attack complex)|GO:0004866(endopeptidase inhibitor activity)|GO:0005515(protein binding)|GO:0005576(extracellular region)|GO:0005615(extracellular space)|GO:0006629(lipid metabolic process)|GO:0006631(fatty acid metabolic …	ATTCACAGAATCTATGGTGGTTTATGGTTGTCCCAACTGACTACAGCCCAGCCCTCTAAT	379.248	483	217	309	234	228	240	319	856	1150	382	461	1790	2050	371	347	3.9447	3.72168	3.83319	0.943464
A_55_P2061084	Wfikkn2	WAP, follistatin/kazal, immunoglobulin, kunitz and netrin domain containing 2	ref|NM_181819|ens|ENSMUST00000061469|gb|AK011977|gb|BB204307	Mus musculus WAP, follistatin/kazal, immunoglobulin, kunitz and netrin domain containing 2 (Wfikkn2), mRNA [NM_181819]	GO:0004857(enzyme inhibitor activity)|GO:0004867(serine-type endopeptidase inhibitor activity)|GO:0005515(protein binding)|GO:0005575(cellular_component)|GO:0005576(extracellular region)|GO:0007179(transforming growth factor beta receptor signaling pathway)|GO:0008191(metalloendopeptidase inhibitor activity)|GO:0010466(negative regulation of peptidase activity)|GO:0030414(peptidase inhibitor acti…	TGGGATGCCCTAATGGCTTCCTCAAATATACGGAGGACGATAATAAATAAAATTTCATAG	99.1223	119	54	62.9	101	116	133	158	127	329	226	132	148	189	128	101	2.35185	5.23052	3.79119	2.224
A_51_P382407	41531	septin 14	ref|NM_028826|ens|ENSMUST00000042266|ens|ENSMUST00000182381|gb|AK006043	Mus musculus septin 14 (Sept14), mRNA [NM_028826]	GO:0000166(nucleotide binding)|GO:0003674(molecular_function)|GO:0005525(GTP binding)|GO:0005575(cellular_component)|GO:0005737(cytoplasm)|GO:0005856(cytoskeleton)|GO:0007049(cell cycle)|GO:0008150(biological_process)|GO:0031105(septin complex)|GO:0051301(cell division)	TGAGTTCAGAACCCCATTATCCTCCATTCGTGTACCCACTTAGCTCGGACTGAAATTCTA	30.4181	0.01	24.5	21.7	44.1	40.8	61.8	76.7	54.1	116	31.4	28.7	41.1	14.4	105	68.3	2.20816	5.34562	3.77689	2.42085
A_51_P110301	C3	complement component 3	ref|NM_009778|ens|ENSMUST00000024988|gb|K02782|gb|BC043338	Mus musculus complement component 3 (C3), mRNA [NM_009778]	GO:0001798(positive regulation of type IIa hypersensitivity)|GO:0001934(positive regulation of protein phosphorylation)|GO:0001970(positive regulation of activation of membrane attack complex)|GO:0004866(endopeptidase inhibitor activity)|GO:0005515(protein binding)|GO:0005576(extracellular region)|GO:0005615(extracellular space)|GO:0006629(lipid metabolic process)|GO:0006631(fatty acid metabolic …	ATTCACAGAATCTATGGTGGTTTATGGTTGTCCCAACTGACTACAGCCCAGCCCTCTAAT	372.716	466	247	277	217	277	258	265	820	1170	383	469	1830	1990	371	323	3.31984	4.22383	3.77183	1.2723
A_30_P01033542			chr9:75316023-75344401_F	lincRNA:chr9:75316023-75344401 forward strand		AATAAGACTGAGACAAATAAAGTGGGTATGTGGAATCACAAGGGCTTTATGTGTGTGCAT	36.833	58.5	20.7	37.2	26.5	52.8	43	48.2	121	62.8	40.1	70.6	21.3	49.6	54.9	39.8	5.84541	1.68817	3.76679	0.288803
A_30_P01025859			chr6:5311375-5328075_R	lincRNA:chr6:5311375-5328075 reverse strand		TGATAGGGGAAAAAATTGGTAAGAGGCTAGGGAGGCAGCAAAGTGTTTGCCACACAATCT	62.6431	60.5	13.5	28.4	27.1	31.1	49.7	41.6	73.8	56.8	61.8	13.9	27.6	54.5	65.6	19.2	5.46667	2	3.73333	0.365854
A_55_P2319730	4930414F18Rik	RIKEN cDNA 4930414F18 gene	gb|AK019576|tc|TC1621540|riken|4930414F18|nap|NAP021780-001	Mus musculus adult male testis cDNA, RIKEN full-length enriched library, clone:4930414F18 product:unclassifiable, full insert sequence. [AK019576]	GO:0003674(molecular_function)|GO:0005575(cellular_component)|GO:0008150(biological_process)	GCTGGAGGGGAGAGAAGAGAATGAAAGTGACCTAATTCAACTCAATTAAAATCATTTTTA	59.5381	75.5	24.1	36.5	11.4	32.7	71.6	72.4	118	91.7	28.8	29.5	17.6	90.1	58.6	18.3	4.89627	2.51233	3.7043	0.513111
A_30_P01020600			chrX:146827709-146913398_F	lincRNA:chrX:146827709-146913398 forward strand		ACTCAAACCTGAGCAAAGGGACTGGAGAGCCATTCAAACAAAGGAAGCCTCTTTTAAGTC	36.3951	36.6	19	19.8	12.7	39.3	40	15.6	86.9	55.8	46.4	40	27.6	32.4	57.3	23.7	4.57368	2.81818	3.69593	0.616173
A_51_P110301	C3	complement component 3	ref|NM_009778|ens|ENSMUST00000024988|gb|K02782|gb|BC043338	Mus musculus complement component 3 (C3), mRNA [NM_009778]	GO:0001798(positive regulation of type IIa hypersensitivity)|GO:0001934(positive regulation of protein phosphorylation)|GO:0001970(positive regulation of activation of membrane attack complex)|GO:0004866(endopeptidase inhibitor activity)|GO:0005515(protein binding)|GO:0005576(extracellular region)|GO:0005615(extracellular space)|GO:0006629(lipid metabolic process)|GO:0006631(fatty acid metabolic …	ATTCACAGAATCTATGGTGGTTTATGGTTGTCCCAACTGACTACAGCCCAGCCCTCTAAT	382.965	474	288	271	220	291	248	284	918	1130	377	445	1750	1980	370	335	3.1875	4.16974	3.67862	1.30815
A_30_P01033185			chr4:88604248-88645948_R	lincRNA:chr4:88604248-88645948 reverse strand		GCGATGGAGGGAAATGCCAAAAGTAGACCAGCAACCCAGAAAAAGAAGACATAATCACAT	68.5861	56.1	36.4	80.7	22.1	77.3	78.7	46.9	196	155	80.8	46.5	32.5	96.7	80.7	23.5	5.38462	1.92069	3.65265	0.3567
A_55_P2120016	Krt72	keratin 72	ref|NM_213728|ens|ENSMUST00000127671|ens|ENSMUST00000071104|gb|BC156168	Mus musculus keratin 72 (Krt72), mRNA [NM_213728]	GO:0005198(structural molecule activity)|GO:0005882(intermediate filament)|GO:0045095(keratin filament)	AAGGATCCTCCGGCCAAAACCTCAGGCAGCAGCGGTACAACCAAAAAGACCTCCAGATGA	59.4169	42.7	38.2	35.9	35.7	52.9	86.9	54.2	99.7	166	91.9	28.2	64.8	103	97.7	50.5	2.60995	4.62396	3.61695	1.77167
A_52_P121800	Cyp2j11	cytochrome P450, family 2, subfamily j, polypeptide 11	ref|NM_001004141|ens|ENSMUST00000015368|gb|AK143983|gb|BC080831	Mus musculus cytochrome P450, family 2, subfamily j, polypeptide 11 (Cyp2j11), mRNA [NM_001004141]	GO:0003674(molecular_function)|GO:0004497(monooxygenase activity)|GO:0005575(cellular_component)|GO:0008150(biological_process)|GO:0016491(oxidoreductase activity)|GO:0046872(metal ion binding)|GO:0055114(oxidation-reduction process)	GGAGCAAAAAGGAAGAAAAAGAACAAGAAGAATTGGAGTATGCCCTGAAGATTCTTGGCC	103.43	57.5	17.7	50.6	24.7	50	57.2	26	98.6	82.9	37	57.3	27.5	62.7	60.7	34.2	5.57062	1.63834	3.60448	0.294104
A_55_P2014144	Olfr830	olfactory receptor 830	ref|NM_146566|ens|ENSMUST00000078861|tc|TC1599952|nap|NAP021176-001	Mus musculus olfactory receptor 830 (Olfr830), mRNA [NM_146566]	GO:0004871(signal transducer activity)|GO:0004930(G-protein coupled receptor activity)|GO:0004984(olfactory receptor activity)|GO:0005886(plasma membrane)|GO:0007165(signal transduction)|GO:0007186(G-protein coupled receptor signaling pathway)|GO:0007608(sensory perception of smell)|GO:0016020(membrane)|GO:0016021(integral to membrane)|GO:0050896(response to stimulus)|GO:0050911(detection of chem…	AACAGGGATATGAAGGAGGCCCTGAAGAAAGTTATTGGTAGGACAGCTTCTCTTCTGTGA	48.6424	41.7	20.6	55.3	54	97.1	162	80.8	115	89	79.2	46.2	44.9	95.3	142	57.5	5.58252	1.6094	3.59596	0.288293
A_51_P399845	Fgf2	fibroblast growth factor 2	ref|NM_008006|ens|ENSMUST00000038885|ens|ENSMUST00000138563|gb|AY027551	Mus musculus fibroblast growth factor 2 (Fgf2), mRNA [NM_008006]	GO:0000186(activation of MAPKK activity)|GO:0000189(MAPK import into nucleus)|GO:0001525(angiogenesis)|GO:0001658(branching involved in ureteric bud morphogenesis)|GO:0001759(organ induction)|GO:0001934(positive regulation of protein phosphorylation)|GO:0001938(positive regulation of endothelial cell proliferation)|GO:0002042(cell migration involved in sprouting angiogenesis)|GO:0005102(receptor …	AGCGACCCACACGTCAAACTACAACTCCAAGCAGAAGAGAGAGGAGTTGTGTCTATCAAG	41.2541	35.4	22.5	28.4	24.5	52.7	71.4	38.2	112	62.7	61.6	32.8	157	60.5	56.6	26	4.97778	2.20775	3.59276	0.44352
A_55_P2120055	Fgfr4	fibroblast growth factor receptor 4	ref|NM_008011|ens|ENSMUST00000005452|gb|AK085723|gb|AK084850	Mus musculus fibroblast growth factor receptor 4 (Fgfr4), mRNA [NM_008011]	GO:0000166(nucleotide binding)|GO:0001759(organ induction)|GO:0004672(protein kinase activity)|GO:0004713(protein tyrosine kinase activity)|GO:0004714(transmembrane receptor protein tyrosine kinase activity)|GO:0005007(fibroblast growth factor-activated receptor activity)|GO:0005515(protein binding)|GO:0005524(ATP binding)|GO:0005634(nucleus)|GO:0005737(cytoplasm)|GO:0005768(endosome)|GO:0005783(…	GAGAGACGAGAAGCCTGTGGGAACGACAGAAGAACATGGCATTTTTATAAATTATTTTTT	151.536	129	34	50	6.89	43.5	52	53.7	189	81.2	50.8	102	50.7	80.1	75.5	51.1	5.55882	1.624	3.59141	0.292148
A_30_P01019101			chr8:40072950-40088400_R	lincRNA:chr8:40072950-40088400 reverse strand		AAGAGCAAACTATGGACAGGCAGGACGAAAACAGAATCACTCACTGCTGTGACAAGGAAT	33.0285	19.9	17.2	35	14.7	35.6	55.5	15.7	77.3	92.5	47.8	53.9	26.2	45.2	73.9	21.9	4.49419	2.64286	3.56852	0.588061
A_30_P01030768			chr13:94186098-94186634_F	lincRNA:chr13:94186098-94186634 forward strand		AGAAAAATGAGAAGAGAGGACAGGAGCCCATGAAAGCCCTGATTGTAAACCCTATGCAAG	22.1767	37.5	28.5	57.7	34.6	54.5	64.3	69.6	149	109	91.6	66.1	66.3	102	134	38	5.22807	1.88908	3.55858	0.361334
A_51_P246653	Clec7a	C-type lectin domain family 7, member a	ref|NM_020008|ens|ENSMUST00000112076|gb|AF262985|tc|TC1587603	Mus musculus C-type lectin domain family 7, member a (Clec7a), mRNA [NM_020008]	GO:0001846(opsonin binding)|GO:0001872((1->3)-beta-D-glucan binding)|GO:0001874((1->3)-beta-D-glucan receptor activity)|GO:0001878(response to yeast)|GO:0001879(detection of yeast)|GO:0002221(pattern recognition receptor signaling pathway)|GO:0002238(response to molecule of fungal origin)|GO:0002366(leukocyte activation involved in immune response)|GO:0002752(cell surface pattern recognition rece…	TTAATACCACCCTTATTTCCAGTGTGGACTTCCAAATTGCTGGGGATCTGTTTATAGCTT	112.634	181	25.8	44.8	46.4	61.3	44.3	123	112	124	70.6	62.9	3470	3470	200	141	4.34109	2.76786	3.55447	0.637596
A_51_P485472	Lrrc71	leucine rich repeat containing 71	ref|NM_028971|ens|ENSMUST00000023846|gb|AK029938|tc|TC1587575	Mus musculus leucine rich repeat containing 71 (Lrrc71), mRNA [NM_028971]	GO:0003674(molecular_function)|GO:0005575(cellular_component)|GO:0008150(biological_process)	AAAGCCACGGAGACTTGGGCTAACAGGAGGAAGAGACACTAAACTGGACTGTCTGGTGGG	62.4601	84.6	28	48.7	36.1	106	73.7	45.7	153	79	63.4	44.7	77.3	88.7	99.7	50	5.46429	1.62218	3.54323	0.296869
A_51_P346445	Hspb7	heat shock protein family, member 7 (cardiovascular)	ref|NM_013868|ens|ENSMUST00000102486|gb|AK086011|gb|BC046993	Mus musculus heat shock protein family, member 7 (cardiovascular) (Hspb7), mRNA [NM_013868]	GO:0005634(nucleus)|GO:0005737(cytoplasm)|GO:0005739(mitochondrion)|GO:0006950(response to stress)|GO:0009408(response to heat)|GO:0015629(actin cytoskeleton)|GO:0031005(filamin binding)	GGCCTAGGTAGACTGCCTCAGGGAAGCCAGAGAGATAGCCATGACTGTTACCTTCCTTGT	40.1623	31.5	21.8	23.4	30.1	51.5	53.9	30.7	103	54.6	32.9	34.5	40.2	25.4	72.4	22.3	4.72477	2.33333	3.52905	0.493851
A_55_P2098591	2610318N02Rik	RIKEN cDNA 2610318N02 gene	ref|NM_183287|ens|ENSMUST00000093336|gb|AK012048|gb|AK146836	Mus musculus RIKEN cDNA 2610318N02 gene (2610318N02Rik), mRNA [NM_183287]	GO:0003674(molecular_function)|GO:0005575(cellular_component)|GO:0008150(biological_process)	AGAAGAGGAGGAGGAGGCCAAAACCAAAGAAACCAGATCCTATCTTTCGAGATCAGTCAA	2106.46	1270	745	647	754	578	952	983	2040	2780	2370	1170	1380	889	2830	1430	2.73826	4.29675	3.5175	1.56916
A_30_P01032432			chr17:15357376-15385701_R	lincRNA:chr17:15357376-15385701 reverse strand		AACTGAACAGAACCCAAGGCAGAAACTGATGAGGGAGGGCGGATGTGACCAAACGCTTGC	9.48712	54.4	20.3	34.8	21.9	57.3	61.6	17.9	95.9	78.8	57	37.1	28.1	80.5	38.9	12.7	4.72414	2.26437	3.49425	0.479319
A_30_P01017934			chr14:65206167-65206949_F	lincRNA:chr14:65206167-65206949 forward strand		CGGTATTGCACGGAGGGGACTGAGAAAAAGAGGACTGGAGACCATGAAGCTATTCAGGCA	49.606	68.1	23.7	44.2	31.5	72.9	108	85.9	123	77	74.3	41.2	36.7	74.8	81.2	15.1	5.18987	1.74208	3.46598	0.335669
A_30_P01019180			chr6:128116450-128147150_F	lincRNA:chr6:128116450-128147150 forward strand		AGAACCAAGAGTGCAGAGCCAGACAAGTATGCAGGCCTGACACGACAGCTTCTATCCTCA	47.2646	25.9	15.5	19.7	18.6	36.8	26.1	20.9	55.3	65.3	32.9	3.34	50.1	26.7	32.5	10	3.56774	3.31472	3.44123	0.929081
A_30_P01022107			chr19:60261340-60273465_R	lincRNA:chr19:60261340-60273465 reverse strand		AACTGGGAAGGGACTGGGACATCACTGAGGAAATGAGACTGGAATTTGACTACAGAAAGT	43.3526	29.1	12.5	35.9	12.3	32.8	68.2	34.5	64	63.1	34	21.8	16	29.7	42.9	5.47	5.12	1.75766	3.43883	0.343293
A_51_P477481	1110059M19Rik	RIKEN cDNA 1110059M19 gene	ref|NM_026841|gb|BC060289|gb|AK004321|gb|BC094615	Mus musculus RIKEN cDNA 1110059M19 gene (1110059M19Rik), mRNA [NM_026841]	GO:0003674(molecular_function)|GO:0005575(cellular_component)|GO:0008150(biological_process)	TTCACAGTCACGAGGTCCTCCATATATCCCTACGCTTAGATCAGGGATAATGATGGAAGT	37.718	45.6	17.9	26.6	0.01	3.36	19	31.6	85.3	56.1	18.9	29.9	10.6	7.19	51.4	32.4	4.76536	2.10902	3.43719	0.442573
A_55_P2079991	Gipc3	GIPC PDZ domain containing family, member 3	ref|NM_148951|ens|ENSMUST00000045102|gb|BC156914|gb|AB074494	Mus musculus GIPC PDZ domain containing family, member 3 (Gipc3), mRNA [NM_148951]	GO:0005575(cellular_component)|GO:0008150(biological_process)	AGCAAGTGTCCTGTGGAAGCTAAAGTGAGCAGCGGGAGGGAAACATTACGCCTGCGCTCA	49.9037	39.2	19.3	33.9	13.4	41	64.8	38	101	54.9	32.6	34	47.5	26.3	40.5	23.6	5.23316	1.61947	3.42631	0.309463
A_51_P361448	Scara5	scavenger receptor class A, member 5 (putative)	ref|NM_028903|ens|ENSMUST00000022610|gb|AK133176|gb|BC023907	Mus musculus scavenger receptor class A, member 5 (putative) (Scara5), transcript variant 1, mRNA [NM_028903]	GO:0005044(scavenger receptor activity)|GO:0005515(protein binding)|GO:0005886(plasma membrane)|GO:0005887(integral to plasma membrane)|GO:0006810(transport)|GO:0006811(ion transport)|GO:0006879(cellular iron ion homeostasis)|GO:0006897(endocytosis)|GO:0006898(receptor-mediated endocytosis)|GO:0009986(cell surface)|GO:0016020(membrane)|GO:0016021(integral to membrane)|GO:0034605(cellular response…	ATAATTTGCTCTTGACCCAGGGAGGAGGTTGAACTAGATTGTACATGTGTTCTAGAACCG	38.8107	47.8	19.7	30.5	26.1	24.8	87.3	55.3	97.1	53.7	9.73	60.5	36.6	82.6	96.1	111	4.92893	1.76066	3.34479	0.357208
A_30_P01030613			chr18:61799195-61807139_F	lincRNA:chr18:61799195-61807139 forward strand		AAGGAAGAGGAAAGAGCTGCAGAGGCGGAGACTCTGACCCCAAAGCGATCGAGGGCCCTC	41.5684	62.1	23.8	42	26.3	29.2	42.6	41.6	112	83.3	53.4	36	33.2	80	44	31.8	4.70588	1.98333	3.34461	0.421458
A_55_P2137073						AAGTCAGAAGATAACTGGAGGGATAGACATCACAGGAACCATTTACATTCACCTCTGCAG	23.7219	16.1	14.8	25.1	16.5	18.9	30.5	11.5	56.3	71.9	33.2	6.27	48.3	31.5	40.5	9.3	3.80405	2.86454	3.3343	0.753023
A_30_P01018913			chr1:82892851-82943201_R	lincRNA:chr1:82892851-82943201 reverse strand		ATACAAAGCACAACTTCCCAGTAAGGATGGCACCCAACTGCAGTGCTTAAAGTAAACACC	42.7126	35.4	21.1	18.3	27.9	29.6	50	33.5	82.5	50	39.4	27.2	14.1	52.7	48.2	33.1	3.90995	2.73224	3.3211	0.698791
A_55_P2051367	AA066038	EST AA066038	ref|XR_105761|ref|XR_105807|ref|XR_107006|gb|AK133147	PREDICTED: Mus musculus EST AA066038 (AA066038), misc_RNA [XR_105761]		AGAAACAAAACAGGTCAAGGTGCTGAGGGAAAGCAACAGAAAACAGTCCAGCCTCAAATG	36.8306	48.3	20.2	34.1	22.6	55.5	81.6	52.2	93.8	66.7	55.2	36.6	38.4	74.3	57.4	41.2	4.64356	1.95601	3.29979	0.421231
A_55_P2087399	Tex22	testis expressed gene 22	ref|NM_029381|ens|ENSMUST00000109729|ens|ENSMUST00000146107|ens|ENSMUST00000012355	Mus musculus testis expressed gene 22 (Tex22), mRNA [NM_029381]	GO:0001669(acrosomal vesicle)|GO:0003674(molecular_function)|GO:0005737(cytoplasm)|GO:0008150(biological_process)|GO:0031410(cytoplasmic vesicle)	TTTTGAGGCCCAGACCTCAAGATGGCCTCACTCCTAAGAAGCAGCTCTGCTCAGCCCAGT	35.5343	25.9	31.4	39.5	48.8	69.4	78.2	77.7	116	114	90.9	108	66.2	43	194	254	3.69427	2.88608	3.29017	0.781231
A_55_P2067831	Grm1	glutamate receptor, metabotropic 1	ref|NM_001114333|ref|NM_016976|ens|ENSMUST00000044306	Mus musculus glutamate receptor, metabotropic 1 (Grm1), transcript variant 2, mRNA [NM_001114333]	GO:0000186(activation of MAPKK activity)|GO:0000187(activation of MAPK activity)|GO:0001639(PLC activating G-protein coupled glutamate receptor activity)|GO:0004871(signal transducer activity)|GO:0004930(G-protein coupled receptor activity)|GO:0005515(protein binding)|GO:0005634(nucleus)|GO:0005886(plasma membrane)|GO:0007165(signal transduction)|GO:0007186(G-protein coupled receptor signaling pa…	AATGAGCTTCATCAGAAGTGCTATGGGGAGTAAAGAGAGAAGCGAGACGATATGTACGCA	55.2415	75.8	58	62.3	72.5	125	93.8	101	92	309	51.7	63.8	70.8	110	120	58.2	1.58621	4.95987	3.27304	3.12688
A_51_P495242	Lat	linker for activation of T cells	ref|NM_010689|ens|ENSMUST00000032997|gb|BC013337|gb|AF036907	Mus musculus linker for activation of T cells (Lat), mRNA [NM_010689]	GO:0001772(immunological synapse)|GO:0005057(receptor signaling protein activity)|GO:0005070(SH3/SH2 adaptor activity)|GO:0005515(protein binding)|GO:0005622(intracellular)|GO:0005886(plasma membrane)|GO:0005887(integral to plasma membrane)|GO:0006954(inflammatory response)|GO:0006955(immune response)|GO:0006968(cellular defense response)|GO:0007165(signal transduction)|GO:0007169(transmembrane r…	AAGAGGAAGGGGTGGATGGAGAGGAAGCTCCCGACTATGAGAATCTACAGGAGCTTAACT	47.2561	94.3	40.3	44.6	36.2	66.2	69.5	50.5	159	115	100	43.6	63.2	115	105	40.6	3.94541	2.57848	3.26194	0.653538
A_51_P191649	Ndc80	NDC80 homolog, kinetochore complex component (S. cerevisiae)	ref|NM_023294|ens|ENSMUST00000024851|gb|AK136236|gb|AK163317	Mus musculus NDC80 homolog, kinetochore complex component (S. cerevisiae) (Ndc80), mRNA [NM_023294]	GO:0000070(mitotic sister chromatid segregation)|GO:0000132(establishment of mitotic spindle orientation)|GO:0000775(chromosome, centromeric region)|GO:0000776(kinetochore)|GO:0000777(condensed chromosome kinetochore)|GO:0000942(condensed nuclear chromosome outer kinetochore)|GO:0005515(protein binding)|GO:0005634(nucleus)|GO:0005694(chromosome)|GO:0007049(cell cycle)|GO:0007052(mitotic spindle o…	AGGAGGAAAGAGAAAGAGAACCGAACCGTCTGATGTCATTGAAGAAACTGAAAGCGTCCT	139.195	179	32.3	55.5	19	54	63	27.9	162	83.6	66.5	21.1	61.1	104	59.7	32.8	5.01548	1.50631	3.26089	0.300331
A_55_P2019362	Deptor	DEP domain containing MTOR-interacting protein	gb|AK145208|ens|ENSMUST00000100660|riken|G930020B17	Mus musculus mammary gland RCB-0527 Jyg-MC(B) cDNA, RIKEN full-length enriched library, clone:G930020B17 product:DEP domain containing 6, full insert sequence. [AK145208]	GO:0005622(intracellular)|GO:0006469(negative regulation of protein kinase activity)|GO:0032007(negative regulation of TOR signaling cascade)|GO:0035556(intracellular signal transduction)|GO:0045792(negative regulation of cell size)|GO:2001236(regulation of extrinsic apoptotic signaling pathway)	TGGGCAACATGGCAAGACCTAATGGGAGGGAAGGTGGGTGGGGATGCAATTCCCATATGA	63.6499	58.4	23.9	38.3	31.2	48.9	63.2	23.9	113	68.6	50.1	37	44.8	64.7	34.9	34.6	4.72803	1.79112	3.25958	0.37883
A_30_P01032437			chr5:14923900-15062725_F	lincRNA:chr5:14923900-15062725 forward strand		AACAGGAAACCAAGACAAGAGGTCAGAGATCACATGACCACGTCTGCTGTTCATTGGAAA	36.9025	31.9	17.2	16.7	27.3	32.4	48.2	21.3	54.7	55.7	39.5	22.8	30.3	35	47.6	25.2	3.18023	3.33533	3.25778	1.04877
A_30_P01019144			chr2:25778863-25780329_F	lincRNA:chr2:25778863-25780329 forward strand		ACTGAGGAAGGCAGAGACAGAAGGGTCAACTTGTACCTACATGCTCTGGTCTGTGCCCAT	37.5594	67.6	12.1	29.9	18.7	34.8	97.5	91.4	57.6	51.5	28	42.3	16.4	45.7	67.9	65.6	4.76033	1.72241	3.24137	0.361825
A_30_P01017888			chr5:33773842-33942967_F	lincRNA:chr5:33773842-33942967 forward strand		AAACAGCGGGTCCGCAGCAGGGATGGGATGAGAGCAGCTTAGGAGGCACTACTGTGGGGA	78.8036	53.1	31.8	31.9	29.3	56.6	96	44.7	148	58.2	49.9	31.4	33.8	63.4	72.9	24.9	4.65409	1.82445	3.23927	0.392011
A_30_P01033100			chr15:100905367-100905654_R	lincRNA:chr15:100905367-100905654 reverse strand		AAACTGTGTGACACCGAATTCCAAGGCTTTCCCTGCAAGGGAGAAAGAGGACCACTGTAA	17.8857	16.3	12	32.9	30.5	52	57.2	88.7	50.4	74.8	24	51.8	53	54.4	65.5	81.2	4.2	2.27356	3.23678	0.541323
A_51_P317254	Defb11	defensin beta 11	ref|NM_139221|ens|ENSMUST00000051965|gb|BC099849|gb|AJ437646	Mus musculus defensin beta 11 (Defb11), mRNA [NM_139221]	GO:0003674(molecular_function)|GO:0005576(extracellular region)|GO:0006952(defense response)|GO:0042742(defense response to bacterium)	CTCATACCAAGTTTATAGGTAACTGTCACCCAGACCACCTCCACTGTTGCATAAACATGA	115.909	63	75.3	60.1	91.4	94.6	146	133	191	236	84.4	106	82.7	120	177	152	2.53652	3.92679	3.23165	1.5481
A_30_P01032814			chr6:90915489-90940052_F	lincRNA:chr6:90915489-90940052 forward strand		AAAGTGCCGGCTGCGACGCGAGAGGGAGCGGGAGCCCTAAGATCGTAGAGGGAGGAGGTG	35.5795	33.3	11.9	34.2	24.3	33.3	37	29.5	58.6	52.3	28.1	54.3	16.8	39.7	24.8	46.7	4.92437	1.52924	3.2268	0.310545
A_30_P01022390			chr5:23195569-23218551_R	lincRNA:chr5:23195569-23218551 reverse strand		GAGGTGAACTGGTCCGACTTCCAGAAGAGAAGGTAGGCATCTGTGTGTAGAGTCAAGATT	58.0258	104	19.5	29.8	6.04	23.7	50.2	33.9	83.1	63.1	32.2	22.3	27.3	37.2	62.9	29.1	4.26154	2.11745	3.18949	0.496874
A_66_P104265			ens|ENSMUST00000145453|ens|ENSMUST00000068158|ens|ENSMUST00000107984|gb|AK006581	RIKEN cDNA 4930578G10 gene [Source:MGI Symbol;Acc:MGI:1923202] [ENSMUST00000145453]		GAAACGTAATGGGTATAGCTGCCTGGATTCTACTCATGATCAGAGATTTAATTGGCTTTG	41.3321	38.2	36.8	39.4	48.3	67.4	74.9	79.4	119	122	49.5	38.2	23.5	37.4	54.8	49.2	3.2337	3.09645	3.16507	0.957557
A_55_P2075692	Trpm3	transient receptor potential cation channel, subfamily M, member 3	ref|NM_001035245|ens|ENSMUST00000099566|gb|AK161909|gb|AK082141	Mus musculus transient receptor potential cation channel, subfamily M, member 3 (Trpm3), transcript variant 8, mRNA [NM_001035245]	GO:0005261(cation channel activity)|GO:0006810(transport)|GO:0006811(ion transport)|GO:0006812(cation transport)|GO:0016020(membrane)|GO:0016021(integral to membrane)|GO:0034220(ion transmembrane transport)	TCTCATCGTGGAAGGAGGACCCAATGTGATCTCAATTGTTTTGGAATACCTTCGAGACAC	58.3007	76.6	26.9	26.8	16	25.1	15.3	10.9	68.5	101	27.1	57.7	11.5	40.5	46.9	49.7	2.54647	3.76866	3.15756	1.47995
A_55_P2180849	AA684185	expressed sequence AA684185	gb|AK139675|riken|B020010F15	Mus musculus 2 cells egg cDNA, RIKEN full-length enriched library, clone:B020010F15 product:unclassifiable, full insert sequence. [AK139675]		GAGGAGGGACAACGACAGGGATAAAGACTGGACTGTCAAACACATAATTAAAGTTAATTA	46.9241	42.8	19.7	32.4	0.603	35.4	53.2	13.7	89.6	57	57.4	20.2	11.9	52.2	46.6	17.2	4.54822	1.75926	3.15374	0.386801
A_30_P01017722			chrX:75813213-75829323_F	lincRNA:chrX:75813213-75829323 forward strand		TTCCTGCCAACTCGGCACCCAGGGAAAGCAGAGGAAGGAAAAGAGTAAGCTAGGACACCG	28.588	34.1	21.8	31.9	20.3	34.1	43.9	40.7	94.1	63.4	113	27.8	318	44.6	28.8	26.5	4.31651	1.98746	3.15199	0.460432
A_30_P01033074			chr5:88995039-89009064_F	lincRNA:chr5:88995039-89009064 forward strand		CACTCAGCATCTGTTGGAACGACTGGGGATGGGGCAGAGGTGGGATGGTTTGAAGGAATA	44.2446	54	14.2	38.2	29.1	33	48.7	67.8	67.1	59.3	48.7	33.8	38.9	63.8	188	44.6	4.72535	1.55236	3.13885	0.328516
A_51_P241645	Tmem194	transmembrane protein 194	ref|NM_173732|gb|AK090031|gb|BC030440|tc|TC1586657	Mus musculus transmembrane protein 194 (Tmem194), transcript variant 2, mRNA [NM_173732]	GO:0003674(molecular_function)|GO:0005575(cellular_component)|GO:0008150(biological_process)|GO:0016020(membrane)|GO:0016021(integral to membrane)	TCCATTGCAGGTAATCAAAACAGTACCTTCAGAGTGAGGACCTGAGGTCACAAACCACAA	116.409	164	62	80	50.3	79.8	49.1	81.6	275	144	93.3	59.4	53.1	60.9	89.6	68.9	4.43548	1.8	3.11774	0.405818
A_55_P1981150	Trub2	TruB pseudouridine (psi) synthase homolog 2 (E. coli)	ens|ENSMUST00000113803	TruB pseudouridine (psi) synthase homolog 2 (E. coli) [Source:MGI Symbol;Acc:MGI:2442186] [ENSMUST00000113803]	GO:0001522(pseudouridine synthesis)|GO:0003674(molecular_function)|GO:0003723(RNA binding)|GO:0005575(cellular_component)|GO:0006396(RNA processing)|GO:0008033(tRNA processing)|GO:0008150(biological_process)|GO:0009451(RNA modification)|GO:0009982(pseudouridine synthase activity)|GO:0016853(isomerase activity)	ATGTATGATGCTCATCTCACCAAGGTATCGTGGGCTAAAGATATGGTGCAGCCTACTTAC	33.8647	56.5	15.1	33.2	23.5	42.6	52.8	41.5	58.6	77.8	35.3	54.9	46.7	34.1	30.1	29.7	3.88079	2.34337	3.11208	0.603839
A_55_P1952587			nap|NAP106674-1			ACTGAAGAAGCCAGAGTACAGACATGCCTCATGAACCCATTGAATCTGGGGAAGAATTTG	27.1932	50.6	16.9	32.4	38.4	48.2	50.9	41.8	75.8	55.8	49.7	16.6	28.2	38.8	48.7	24.5	4.48521	1.72222	3.10371	0.383978
A_30_P01023946			chr6:143053023-143069198_F	lincRNA:chr6:143053023-143069198 forward strand		AAGAGAGGAGCAGCACGGTGGCTTTCATAGTCACACGGCAGTGGCAGGAGTCACAGAAAC	29.8669	54.6	22.5	42	18.5	40.6	46.8	50.7	104	66.2	31.3	22.3	20.3	58.9	56.4	21.5	4.62222	1.57619	3.09921	0.341003
A_30_P01025248			chr4:3745750-3756200_R	lincRNA:chr4:3745750-3756200 reverse strand		GATTAAACCCAAACCAGAAACACAGAGATGGACAAAAGACAACCAGGCACCCAAACTTAC	60.6847	52.3	18.9	35.3	28.3	64	86.1	51	85.5	57.9	60.1	32.3	56.7	77.6	70.4	31.8	4.52381	1.64023	3.08202	0.362576
A_55_P2165644	Zbtb4	zinc finger and BTB domain containing 4	ref|NM_029348|ens|ENSMUST00000108639|gb|BC112421|gb|BC113187	Mus musculus zinc finger and BTB domain containing 4 (Zbtb4), mRNA [NM_029348]	GO:0003674(molecular_function)|GO:0005575(cellular_component)|GO:0005634(nucleus)|GO:0008150(biological_process)|GO:0046872(metal ion binding)	CTCTGCCAGTTTCCCCTAAGGGAATAGGGGGAATGACAGGGGTAGAGAGAACCCAGAAGG	30.0224	45.5	27.5	31.2	42.2	57.7	61.8	44.8	55.6	128	54.2	34	52.4	56.1	35.5	40.9	2.02182	4.10256	3.06219	2.02915
A_30_P01018545			chr17:46972160-46997919_F	lincRNA:chr17:46972160-46997919 forward strand		GACCGAGGGGTCTGTGCGGATCGAGCGGCGAGGGGAGGAGATTTGGAGAAGCTGAGTTTT	57.5743	83.3	25.4	51.7	32.6	71.9	108	83.5	113	85.8	103	54.3	89.6	69.2	80.3	38.6	4.44882	1.65957	3.0542	0.373037
A_55_P2027057	Prdm9	PR domain containing 9	ref|NM_144809|ens|ENSMUST00000167994|gb|HQ704390|gb|HQ704391	Mus musculus PR domain containing 9 (Prdm9), mRNA [NM_144809]	GO:0003676(nucleic acid binding)|GO:0005622(intracellular)|GO:0005634(nucleus)|GO:0005654(nucleoplasm)|GO:0005694(chromosome)|GO:0006311(meiotic gene conversion)|GO:0006351(transcription, DNA-dependent)|GO:0006355(regulation of transcription, DNA-dependent)|GO:0007126(meiosis)|GO:0007283(spermatogenesis)|GO:0008168(methyltransferase activity)|GO:0010844(recombination hotspot binding)|GO:0010845(p…	GACAAGGCCAGCAATGAAGTAAAAAGAAAATCCAAACCCAGGCAGAGGATTTCAACAACC	38.9459	60.2	23.4	48.5	27.5	53	78.4	46.8	104	80.7	52.4	48.4	50.3	73.7	55.3	22.6	4.44444	1.66392	3.05418	0.374381
A_51_P125205	Aqp1	aquaporin 1	ref|NM_007472|ens|ENSMUST00000004774|gb|AK157333|gb|AK081886	Mus musculus aquaporin 1 (Aqp1), mRNA [NM_007472]	GO:0003094(glomerular filtration)|GO:0003097(renal water transport)|GO:0005215(transporter activity)|GO:0005223(intracellular cGMP activated cation channel activity)|GO:0005267(potassium channel activity)|GO:0005372(water transmembrane transporter activity)|GO:0005623(cell)|GO:0005634(nucleus)|GO:0005737(cytoplasm)|GO:0005886(plasma membrane)|GO:0005887(integral to plasma membrane)|GO:0005903(bru…	CTGTGTATGTTTCTTTGCAATTGAATTTCATCTTATGGTAAGAAAATAAAGGACAATGAC	296.938	394	164	213	98	138	81.2	147	429	738	126	209	502	496	305	254	2.61585	3.46479	3.04032	1.32453
A_30_P01029530			chr16:90116006-90119297_R	lincRNA:chr16:90116006-90119297 reverse strand		AGAGGAAACGAAAAATAAAGACTCACCCATAACCCCATGATTCTTTGTGCATGCCCCCTC	92.9579	87.1	71.9	88.9	71.7	86.1	144	90.5	143	357	104	72.6	51	106	133	89.9	1.98887	4.01575	3.00231	2.01911
A_55_P2365902	C130033p17rik	uncharacterized LOC402769	gb|AK048087|tc|TC1606186|riken|C130033P17	Mus musculus 16 days embryo head cDNA, RIKEN full-length enriched library, clone:C130033P17 product:unclassifiable, full insert sequence. [AK048087]		TTCTGTTCAAGAAGAGGGAGGAGGGGAGCCACAAAATACCATTCATCCAAACACCTGAAA	90.075	116	24.5	30.9	11.1	34	31	37	96.6	62.6	40.3	22.7	16.7	51.6	298	10.1	3.94286	2.02589	2.98437	0.513813
A_30_P01018878			chr8:71938275-72113375_F	lincRNA:chr8:71938275-72113375 forward strand		TGTTTTCTGATAGATAGTGAGAGAAAGTCTTGTCTGAAGTTGGGCTTCATCCCTAAAAAA	85.8527	93.2	37.7	43.8	64.3	52.6	91.3	106	58	193	50.6	75.5	50	87.9	68.7	160	1.53846	4.40639	2.97243	2.86416
A_30_P01029271			chr3:41143423-41359623_R	lincRNA:chr3:41143423-41359623 reverse strand		GAAAAGAGAAGAGGGAAAACGCTACAGAAGTATCAGTATAGAAATAAAGAAACAGATGGT	26.6152	24.3	17.6	21.9	2.04	67.3	31.2	5.57	60.2	55.1	30	16.7	15	53.3	8.43	8.11	3.42045	2.51598	2.96822	0.735569
A_30_P01023083			chr6:57583950-57624216_R	lincRNA:chr6:57583950-57624216 reverse strand		TAGATTAAGGAAAGACAGAAGAATCCCAAAGTGAAACACCTAGTTCCCGAGGCTGTGAAC	18.9281	24.2	11.6	41.1	28.2	28.5	37.1	46.2	50.6	63.9	41.8	51.4	46.6	41.4	28.6	45.7	4.36207	1.55474	2.95841	0.356424
A_55_P1990032	Cxcl5	chemokine (C-X-C motif) ligand 5	ref|NM_009141|ens|ENSMUST00000031318|gb|AK044397|gb|AK156787	Mus musculus chemokine (C-X-C motif) ligand 5 (Cxcl5), mRNA [NM_009141]	GO:0001776(leukocyte homeostasis)|GO:0001816(cytokine production)|GO:0005125(cytokine activity)|GO:0005576(extracellular region)|GO:0005615(extracellular space)|GO:0006935(chemotaxis)|GO:0006954(inflammatory response)|GO:0006955(immune response)|GO:0008009(chemokine activity)|GO:0010976(positive regulation of neuron projection development)|GO:0031100(organ regeneration)|GO:0032496(response to lip…	GCTGAGATATTTAGATGTCTGTAGTGTGTCTTTTAAAGAGTGTGCTTTGTTATAAGGAGA	20.5672	27.2	16.9	31.7	73.4	107	70.2	99.9	51	91.3	57	58	928	1050	218	214	3.01775	2.88013	2.94894	0.954395
A_52_P447944	Epcam	epithelial cell adhesion molecule	ref|NM_008532|ens|ENSMUST00000053577|gb|AK167182|gb|AK145752	Mus musculus epithelial cell adhesion molecule (Epcam), mRNA [NM_008532]	GO:0005886(plasma membrane)|GO:0005923(tight junction)|GO:0008284(positive regulation of cell proliferation)|GO:0009986(cell surface)|GO:0016020(membrane)|GO:0016021(integral to membrane)|GO:0016323(basolateral plasma membrane)|GO:0016324(apical plasma membrane)|GO:0016328(lateral plasma membrane)|GO:0030054(cell junction)	AAATCAGCAAAATATGAGAAGGCTGAGATAAAGGAGATGGGTGAGATCCACAGAGAGCTT	33.3019	40.6	16	22.9	0.01	16	6.5	0.01	52.3	60.2	26	11.7	15.6	40.4	0.01	0.01	3.26875	2.62882	2.94879	0.804228
A_55_P2091393			gb|AK140523|riken|B930020D16	Mus musculus 10 days neonate cerebellum cDNA, RIKEN full-length enriched library, clone:B930020D16 product:hypothetical protein, full insert sequence. [AK140523]		GTGGCTTCCACCACCAGTCTGGGAGGTAGCAAACAGGGAACCACAGCAAGGGATAAATAA	65.9021	70.2	21.7	35.1	26	48.7	82.2	41.6	91.2	58.7	41.6	15.7	32	65.4	57.1	48.8	4.20276	1.67236	2.93756	0.39792
A_55_P2031856						AGTCTGGAGGTCTGGCACGGGCTGCAGGGTATAGATTGATGCAATTTCCTTAGCACCAAC	82.1633	63.3	20.4	40.8	26.6	41.9	82.4	55.2	76.9	84.5	66.9	42.4	44.9	66.1	74.3	57.2	3.76961	2.07108	2.92034	0.549415
A_51_P286737	Ccl2	chemokine (C-C motif) ligand 2	ref|NM_011333|ens|ENSMUST00000124479|ens|ENSMUST00000000193|gb|AK153468	Mus musculus chemokine (C-C motif) ligand 2 (Ccl2), mRNA [NM_011333]	GO:0001525(angiogenesis)|GO:0001664(G-protein coupled receptor binding)|GO:0001938(positive regulation of endothelial cell proliferation)|GO:0005125(cytokine activity)|GO:0005515(protein binding)|GO:0005576(extracellular region)|GO:0005615(extracellular space)|GO:0005737(cytoplasm)|GO:0006874(cellular calcium ion homeostasis)|GO:0006935(chemotaxis)|GO:0006954(inflammatory response)|GO:0006955(imm…	TGTAGGAGTGACCAGTGTGACAGTGAACTAGTGTGACTCGGACTGTGATGCCTTAATTAA	68.8323	120	30.5	64.8	47.6	63.2	55.1	84.9	108	149	53.2	67.4	1110	1420	86.1	71.7	3.54098	2.29938	2.92018	0.649363
A_55_P1976293			ens|ENSMUST00000180687|ens|ENSMUST00000181210|gb|X02969|gb|X02931	T cell receptor alpha variable 6D-5 [Source:MGI Symbol;Acc:MGI:3649416] [ENSMUST00000180687]		ACAGCTCCTCTTTAAAGTCCCAAAGGCCAACGAGAAGGGAAGCAACAGAGGTTTTGAAGC	42.1775	38.7	17.8	29.2	32.6	40.6	58	38.9	71.8	52.2	43.1	31.3	38	57	60.5	17.6	4.03371	1.78767	2.91069	0.443183
A_30_P01031245			chr14:33895294-33923644_R	lincRNA:chr14:33895294-33923644 reverse strand		AGGGAGTGTGGTCTGAAAGCAAGGGATGTGGTCTGAGAACAGGGGTTGTGGTCTGAGAGC	68.6127	77.3	40.9	48.1	43.5	70.7	163	71.7	165	85.3	84.4	45.2	51.5	92.2	78.3	46.3	4.03423	1.77339	2.90381	0.439585
A_30_P01030267			chr7:67001975-67050575_F	lincRNA:chr7:67001975-67050575 forward strand		ACTTTCCCTTTGACCTTGCCAAGGAGGCTGACAACAAGGTCCAAATATACCAAGGATATC	27.3824	35.9	14.5	36.2	33.9	18.7	38.1	33.8	58.1	64.9	17.8	22.7	43.9	32.7	25	19.5	4.0069	1.79282	2.89986	0.447433
A_55_P2084470	Trim65	tripartite motif-containing 65	ref|NM_178802|ens|ENSMUST00000133039|ens|ENSMUST00000154061|ens|ENSMUST00000067632	Mus musculus tripartite motif-containing 65 (Trim65), mRNA [NM_178802]	GO:0003674(molecular_function)|GO:0005575(cellular_component)|GO:0008150(biological_process)|GO:0008270(zinc ion binding)|GO:0046872(metal ion binding)	CTTCGAGCTGTGGCAGGTGCAGTGTACCCAGAGTTTTCAGACTGGACAACATTACTGGGA	33.6658	55.7	35.9	27.5	37.5	20.7	74.4	43.6	69.8	106	29.2	29	37.3	37.1	49.1	36.5	1.94429	3.85455	2.89942	1.9825
A_55_P2038212	Atp13a4	ATPase type 13A4	ref|NM_001164613|ens|ENSMUST00000039090|ens|ENSMUST00000182168|gb|AK028776	Mus musculus ATPase type 13A4 (Atp13a4), transcript variant 3, mRNA [NM_001164613]	GO:0000166(nucleotide binding)|GO:0003674(molecular_function)|GO:0005524(ATP binding)|GO:0005575(cellular_component)|GO:0006812(cation transport)|GO:0016020(membrane)|GO:0016021(integral to membrane)|GO:0016787(hydrolase activity)|GO:0016887(ATPase activity)|GO:0019829(cation-transporting ATPase activity)|GO:0046872(metal ion binding)	GGCAGAGAAGGCAGTATTCTCCATGGCAGCTGGGTTCAATTACACAGGGCATTTAAAAAA	32.5825	40.3	22.9	71.9	23.9	47.7	55.2	72.3	78.2	171	160	53.3	50.8	56.8	79.2	22.9	3.41485	2.3783	2.89658	0.69646
A_51_P286737	Ccl2	chemokine (C-C motif) ligand 2	ref|NM_011333|ens|ENSMUST00000124479|ens|ENSMUST00000000193|gb|AK153468	Mus musculus chemokine (C-C motif) ligand 2 (Ccl2), mRNA [NM_011333]	GO:0001525(angiogenesis)|GO:0001664(G-protein coupled receptor binding)|GO:0001938(positive regulation of endothelial cell proliferation)|GO:0005125(cytokine activity)|GO:0005515(protein binding)|GO:0005576(extracellular region)|GO:0005615(extracellular space)|GO:0005737(cytoplasm)|GO:0006874(cellular calcium ion homeostasis)|GO:0006935(chemotaxis)|GO:0006954(inflammatory response)|GO:0006955(imm…	TGTAGGAGTGACCAGTGTGACAGTGAACTAGTGTGACTCGGACTGTGATGCCTTAATTAA	67.6126	132	41.5	54	55.4	75.5	65.9	75.8	108	172	42.5	47.2	1210	1410	76.7	82.4	2.60241	3.18519	2.8938	1.22394
A_30_P01027840			chr5:34696192-34722842_R	lincRNA:chr5:34696192-34722842 reverse strand		AGGGGCAGCTGCTGGCGAGAGCGACGCGAGTCCACCGGGCCCGGTGCCGCCGCTGACCAG	94.3066	136	91.7	86.4	76.8	101	96	78.6	194	317	92.3	88	90.8	94.3	89.3	78.3	2.11559	3.66898	2.89229	1.73426
A_30_P01032095			chr15:5446560-5549135_R	lincRNA:chr15:5446560-5549135 reverse strand		AAAGTCAGCCCCAGATGGATCTGATTGAAATAAACACAGTCATCCCTCATTCCAACCACA	73.9482	47.6	25.2	36.2	57.8	61.1	91	66.4	95	72.7	63.4	51.5	41.6	33.1	77.6	62.4	3.76984	2.00829	2.88906	0.532725
A_55_P2096375	Dydc2	DPY30 domain containing 2	ref|NM_027717|ens|ENSMUST00000022316|gb|BC113750|gb|AK016963	Mus musculus DPY30 domain containing 2 (Dydc2), mRNA [NM_027717]	GO:0003674(molecular_function)|GO:0005575(cellular_component)|GO:0008150(biological_process)	GCGCTGAGGAAGCAAAAACAACAGAAATGCTGAAAGAAGAAGGCTATCAGATTCAGCAGA	30.2525	43.5	23.8	26.9	14.4	52.5	68.1	52.9	89.7	53.7	137	33.7	42.2	58.5	86	39.7	3.76891	1.99628	2.8826	0.529671
A_55_P2068600	9430025E04Rik	RIKEN cDNA 9430025E04 gene	gb|AK034691|tc|TC1627579|riken|9430025E04|nap|NAP078416-1	Mus musculus 12 days embryo embryonic body between diaphragm region and neck cDNA, RIKEN full-length enriched library, clone:9430025E04 product:unclassifiable, full insert sequence. [AK034691]	GO:0003674(molecular_function)|GO:0005575(cellular_component)|GO:0008150(biological_process)	ATGGAAATGACGCACCTGCAATTGGATTCTCTCACACAAAAGGGAAACACTCCCGTTCTA	26.7352	10.4	16.9	35.8	28	22.9	44.7	45.3	52.3	95.2	36.7	31.2	25.5	49.1	83.1	50.2	3.09467	2.65922	2.87695	0.859288
A_55_P2179074	Ciita	class II transactivator	ref|NM_001243760|ref|NM_007575|ref|NM_001243761|ens|ENSMUST00000023147	Mus musculus class II transactivator (Ciita), transcript variant 1, mRNA [NM_001243760]	GO:0000122(negative regulation of transcription from RNA polymerase II promoter)|GO:0000166(nucleotide binding)|GO:0005524(ATP binding)|GO:0005634(nucleus)|GO:0006351(transcription, DNA-dependent)|GO:0006355(regulation of transcription, DNA-dependent)|GO:0008022(protein C-terminus binding)|GO:0009986(cell surface)|GO:0016605(PML body)|GO:0032403(protein complex binding)|GO:0033613(activating tran…	GCCCCATCTAATGCAAAACAAAACAAAACGAAACAAAACAAAACAAAACAAAACAAAACA	55.0565	95.2	37.6	65.1	46.3	79.4	72.4	75.7	143	125	95.4	88.3	97.2	139	113	73.3	3.80319	1.92012	2.86166	0.504871
A_55_P1957459	Lilrb4	leukocyte immunoglobulin-like receptor, subfamily B, member 4	ref|NM_013532|ref|NM_008147|ens|ENSMUST00000105481|ens|ENSMUST00000078778	Mus musculus leukocyte immunoglobulin-like receptor, subfamily B, member 4 (Lilrb4), mRNA [NM_013532]	GO:0005886(plasma membrane)|GO:0016020(membrane)|GO:0016021(integral to membrane)	GCCATCATGAATACCTCATGTGTTATCAGAAGCTTCTCAGAATTTTGGGAATATACTTTA	56.5261	50.9	34.5	27.9	38.2	42.8	46.7	51.4	69.2	102	53.1	53.7	2970	2900	75.8	70.6	2.0058	3.65591	2.83086	1.82267
A_55_P2050902	Fetub	fetuin beta	ref|NM_021564|ref|NM_001083905|ref|NM_001083904|ens|ENSMUST00000167399	Mus musculus fetuin beta (Fetub), transcript variant 1, mRNA [NM_021564]	GO:0004857(enzyme inhibitor activity)|GO:0004869(cysteine-type endopeptidase inhibitor activity)|GO:0005576(extracellular region)|GO:0005615(extracellular space)|GO:0007338(single fertilization)|GO:0007339(binding of sperm to zona pellucida)|GO:0008191(metalloendopeptidase inhibitor activity)|GO:0010466(negative regulation of peptidase activity)|GO:0010951(negative regulation of endopeptidase act…	ATGGTCCCCAGCACTAAATGGGAGGTGGTGGGGATTGGGAAGGACACAGACAATGAAATG	50.996	67.7	23.4	40.1	18.1	12.4	37.4	33.2	96.6	61.2	39.1	25.6	87.9	49.5	54.8	24.6	4.12821	1.52618	2.82719	0.369697
A_52_P302544	Col8a2	collagen, type VIII, alpha 2	ref|NM_199473|ens|ENSMUST00000070132|gb|AK131153|gb|BC080317	Mus musculus collagen, type VIII, alpha 2 (Col8a2), mRNA [NM_199473]	GO:0001525(angiogenesis)|GO:0005576(extracellular region)|GO:0005578(proteinaceous extracellular matrix)|GO:0005581(collagen)|GO:0005604(basement membrane)|GO:0007155(cell adhesion)|GO:0031012(extracellular matrix)|GO:0048593(camera-type eye morphogenesis)|GO:0050673(epithelial cell proliferation)	ACTTACCACATATCACATATCAGGTTCAGGAAAAATGCACCGGGAATCAGAGAAAATGGG	111.425	139	44.4	59.9	104	135	107	128	130	162	128	119	471	471	161	183	2.92793	2.70451	2.81622	0.923693
A_55_P2085142	Spp1	secreted phosphoprotein 1	ref|NM_001204233|ref|NM_001204201|ref|NM_001204203|ref|NM_001204202	Mus musculus secreted phosphoprotein 1 (Spp1), transcript variant 5, mRNA [NM_001204233]	GO:0001503(ossification)|GO:0005125(cytokine activity)|GO:0005576(extracellular region)|GO:0005615(extracellular space)|GO:0005737(cytoplasm)|GO:0007155(cell adhesion)|GO:0010811(positive regulation of cell-substrate adhesion)|GO:0030593(neutrophil chemotaxis)|GO:0031214(biomineral tissue development)|GO:0033280(response to vitamin D)|GO:0043066(negative regulation of apoptotic process)|GO:004517…	AGGTGATAGCTTGGCTTATGGACTGAGGTCAAAGTCTAGGAGTTTCCAGGTTTCTGATGA	224.237	276	42	51.1	146	232	190	234	154	98.7	124	155	19100	18500	173	161	3.66667	1.93151	2.79909	0.526775
A_52_P84347	4931419H13Rik	RIKEN cDNA 4931419H13 gene	ref|NR_040593|gb|AK016464|tc|TC1600269|riken|4931419H13	Mus musculus RIKEN cDNA 4931419H13 gene (4931419H13Rik), long non-coding RNA [NR_040593]		AGAGAAAAGGGGTCCGTGTAGGAAATTGTATCAGAGAGAAAGGATCAGACAGACTCTTGG	43.9994	65.2	38.2	36.8	7.26	34.9	113	35.4	123	87.2	44.7	40.7	28.8	92.1	50.5	10.5	3.2199	2.36957	2.79473	0.735914
A_51_P346445	Hspb7	heat shock protein family, member 7 (cardiovascular)	ref|NM_013868|ens|ENSMUST00000102486|gb|AK086011|gb|BC046993	Mus musculus heat shock protein family, member 7 (cardiovascular) (Hspb7), mRNA [NM_013868]	GO:0005634(nucleus)|GO:0005737(cytoplasm)|GO:0005739(mitochondrion)|GO:0006950(response to stress)|GO:0009408(response to heat)|GO:0015629(actin cytoskeleton)|GO:0031005(filamin binding)	GGCCTAGGTAGACTGCCTCAGGGAAGCCAGAGAGATAGCCATGACTGTTACCTTCCTTGT	48.369	33.1	21	42.9	19.3	44.5	71.5	46.3	85.4	64.5	39.8	37.7	32.3	54.6	90.9	36.4	4.06667	1.5035	2.78508	0.369712
A_30_P01031273			chr4:128727332-128735227_R	lincRNA:chr4:128727332-128735227 reverse strand		ACAGCAGTACAGCAGCAGTACAACCATACAGATAACCAGTGTCACTTTTACTACCAGCCT	84.7335	53	20.7	42.9	28.8	153	48.8	144	81	69.7	52.7	42.6	22.8	60.5	56	51.2	3.91304	1.62471	2.76888	0.415203
A_52_P645410	Apobec3	apolipoprotein B mRNA editing enzyme, catalytic polypeptide 3	ref|NM_030255|ref|NM_001160415|ens|ENSMUST00000176868|ens|ENSMUST00000175849	Mus musculus apolipoprotein B mRNA editing enzyme, catalytic polypeptide 3 (Apobec3), transcript variant 2, mRNA [NM_030255]	GO:0003824(catalytic activity)|GO:0005515(protein binding)|GO:0005634(nucleus)|GO:0005737(cytoplasm)|GO:0008270(zinc ion binding)|GO:0010529(negative regulation of transposition)|GO:0016787(hydrolase activity)|GO:0016814(hydrolase activity, acting on carbon-nitrogen (but not peptide) bonds, in cyclic amidines)|GO:0045071(negative regulation of viral genome replication)|GO:0045087(innate immune re…	AAAGATACCTTCTTGTGCTATGAAGTGACTAGAAAGGACTGCGATTCACCCGTCTCCCTT	18.1555	18.1	15.8	23.7	28.7	26.2	37.7	31.9	50.6	54.2	77.3	50	81	72	79.3	82.7	3.20253	2.28692	2.74473	0.714097
A_30_P01023506			chr18:61788148-61788307_R	lincRNA:chr18:61788148-61788307 reverse strand		AGAAGAGGAAGTACAAGGATGTCCAGGGTTGACTGGCACACACTGCAGCTTCTGGGGCCA	32.4943	28.3	17	29.4	21.5	38.9	45.2	19.9	56	64.5	43.9	12.8	50.6	61.4	69	37.9	3.29412	2.19388	2.744	0.665999
A_55_P2018307						TTGTAAAAACCGTATTTGTTTCAGGAGATTAGAGGGACATAAACCGGCCCCCTCGATGTT	5912.27	4740	4100	1390	8410	7540	6220	5840	6270	5500	3180	916	6230	5370	5880	5910	1.52927	3.95683	2.74305	2.5874
A_55_P2032202			tc|TC1666469	RNF19_MOUSE (P50636) RING finger protein 19 (XY body protein) (XYbp) (Gametogenesis expressed protein GEG-154) (UBCM4-interacting protein 117) (UIP117), partial (48%) [TC1666469]		TCTAGACTACAGTGTAGGCCCATGAATGCTGCAGACTAAGAACCACAGAACAACCTTGTT	124.132	193	41.5	84.8	70.6	90.1	56.5	85.5	115	230	74.6	75.3	71.9	95.6	66.5	90.1	2.77108	2.71226	2.74167	0.978774
A_30_P01025571			chr1:51753968-51803787_R	lincRNA:chr1:51753968-51803787 reverse strand		AGGGAGGGCCGTTTTTCAGAAAAGCAACTGATCAAAGACATCAAGATTCTGGCACTTAGG	42.2686	90.6	26.3	28.3	9.33	33	45.5	26.5	92.3	55.2	69.4	25.6	21.6	57.1	46.3	19.6	3.50951	1.95053	2.73002	0.555785
A_55_P2040873	Gm867	predicted gene 867	ref|NM_001277132|ens|ENSMUST00000059658|gb|AK144847|riken|G730041L12	Mus musculus predicted gene 867 (Gm867), mRNA [NM_001277132]	GO:0003674(molecular_function)|GO:0005575(cellular_component)|GO:0008150(biological_process)	GCCAACAGGGCAGTAAATGGGCACACAGCAGGCTGTGGTCTAAAGTAAACTTTTTAATTG	45.0348	45.7	24.1	37.1	25.6	50.4	31.9	36.1	62.9	105	35.6	43.1	56.9	83.5	44.5	50.4	2.60996	2.83019	2.72007	1.08438
A_30_P01033029			chr12:110896603-110940553_F	lincRNA:chr12:110896603-110940553 forward strand		GCATGTGTAACTGAACGAAATGATAAGTGAATAAGTGAATGAAAGGCCAATAGGCAGACG	36.2914	35.7	28.2	38.8	14.6	43	25	1.99	110	58.2	130	11.5	3.44	55.6	15.3	18.5	3.90071	1.5	2.70035	0.384545
A_30_P01027455			chr5:137392195-137426421_R	lincRNA:chr5:137392195-137426421 reverse strand		CGAGGGTCAGGGCTAGGGTGGAAGGTGTAGCAGTAAGAAATCTCCTACCGCCCTGTGTGA	62.5172	64.4	35.9	37.6	38.9	86.4	74.7	78.4	127	69.3	59.6	44	39.1	81	102	42.8	3.5376	1.84309	2.69034	0.520998
A_51_P351015	Lta	lymphotoxin A	ref|NM_010735|ens|ENSMUST00000025266|gb|AK156659|gb|AK080308	Mus musculus lymphotoxin A (Lta), mRNA [NM_010735]	GO:0002876(positive regulation of chronic inflammatory response to antigenic stimulus)|GO:0002925(positive regulation of humoral immune response mediated by circulating immunoglobulin)|GO:0005125(cytokine activity)|GO:0005164(tumor necrosis factor receptor binding)|GO:0005576(extracellular region)|GO:0005615(extracellular space)|GO:0006927(transformed cell apoptotic process)|GO:0006954(inflammato…	AGGGGAAAAATAGAAAGCCGTCAGATGACAACTAGGTCCCAGACACAAAGGTGTCTCACC	43.735	62.9	33.3	29.7	19.2	72.6	77.5	29.8	123	50.1	66.2	45.9	40.3	95.4	47.1	44.3	3.69369	1.68687	2.69028	0.456689
A_30_P01028756			KCNQ1ot1	lincRNA:chr7:150399015-150482452 forward strand		TCCAAGTAGAATCACACAGAGGGAAAAGAAGCGTGTTGAAGAAAAACTGAGAGAACCCAG	44.4308	49.3	22.1	44.4	21.7	54.3	50.5	49.2	78.7	80.2	38.3	32.2	38.9	73.1	40.1	25.1	3.56109	1.80631	2.6837	0.507235
A_30_P01028640			chr12:20240893-20435318_R	lincRNA:chr12:20240893-20435318 reverse strand		TGCAATGACCAGCACAGAGCCGATTGCAATGCAAACACACAGAGGTCTTTTTTATGAGCT	57.104	54.6	28.8	19.4	17.9	44.3	28.7	34.2	50.5	69.6	53.7	52.2	63.2	140	85	43.5	1.75347	3.58763	2.67055	2.04601
A_55_P2050178						CAAGAACAAGAACAAGAACAAGAACAAGACAGGGCATTCAGAGAAGGGTCTGGATGGTGA	86.3725	101	38	47.1	17.1	64.1	104	56.8	144	72.6	49.1	43.7	36.3	88.8	59	32.3	3.78947	1.5414	2.66544	0.406759
A_55_P2213968	4933416M07Rik	RIKEN cDNA 4933416M07 gene	ref|NR_045840|gb|AK016835|tc|TC1627875|riken|4933416M07	Mus musculus RIKEN cDNA 4933416M07 gene (4933416M07Rik), long non-coding RNA [NR_045840]	GO:0003674(molecular_function)|GO:0005575(cellular_component)|GO:0008150(biological_process)	TGGGAGGAAAGGAGGGAGGGGGAACCATGATCAAATACATTACATGAAAAAACATTATTC	48.8157	34	22.2	35.9	13.9	38.3	35.1	20	81	58.4	44.9	29.6	20.4	55.1	25.6	5.57	3.64865	1.62674	2.63769	0.445848
A_30_P01021841			chr7:68849401-68958266_R	lincRNA:chr7:68849401-68958266 reverse strand		TTCCATTAGGAAACTTAGGAAGGAGGAGGGCAAGAGATGAATCAGCAGACTGATGGTGAT	37.219	45.3	30.7	34.5	25.8	43.6	33.3	41.6	112	56.1	61.7	46.9	40.3	71.9	71.4	22.1	3.64821	1.62609	2.63715	0.445722
A_51_P286737	Ccl2	chemokine (C-C motif) ligand 2	ref|NM_011333|ens|ENSMUST00000124479|ens|ENSMUST00000000193|gb|AK153468	Mus musculus chemokine (C-C motif) ligand 2 (Ccl2), mRNA [NM_011333]	GO:0001525(angiogenesis)|GO:0001664(G-protein coupled receptor binding)|GO:0001938(positive regulation of endothelial cell proliferation)|GO:0005125(cytokine activity)|GO:0005515(protein binding)|GO:0005576(extracellular region)|GO:0005615(extracellular space)|GO:0005737(cytoplasm)|GO:0006874(cellular calcium ion homeostasis)|GO:0006935(chemotaxis)|GO:0006954(inflammatory response)|GO:0006955(imm…	TGTAGGAGTGACCAGTGTGACAGTGAACTAGTGTGACTCGGACTGTGATGCCTTAATTAA	77.7695	115	36.6	56.8	50.3	67.5	44.7	65.6	102	141	39.2	40.2	1140	1370	93.5	68.6	2.78689	2.48239	2.63464	0.890742
A_55_P1971179	Cd1d1	CD1d1 antigen	ref|NM_007639|ens|ENSMUST00000029717|ens|ENSMUST00000107620|gb|M63695	Mus musculus CD1d1 antigen (Cd1d1), mRNA [NM_007639]	GO:0001916(positive regulation of T cell mediated cytotoxicity)|GO:0005515(protein binding)|GO:0005737(cytoplasm)|GO:0005764(lysosome)|GO:0005768(endosome)|GO:0005769(early endosome)|GO:0005770(late endosome)|GO:0005886(plasma membrane)|GO:0006955(immune response)|GO:0009897(external side of plasma membrane)|GO:0009986(cell surface)|GO:0016020(membrane)|GO:0016021(integral to membrane)|GO:0019882…	TCTGGGGATGAAGGAGAGGAATCCTGAAGAAGTGAAGAGCAGCCAGTACGCTCTTTTCAA	125.095	119	25.4	44.1	28.4	52.1	47.8	23.5	90.5	75	60.1	27.5	44.9	78.2	42.6	26.4	3.56299	1.70068	2.63184	0.477318
A_65_P17476	Gse1	genetic suppressor element 1	ref|NM_198671|ref|NM_001145896|ref|NM_001145897|ens|ENSMUST00000118136	Mus musculus genetic suppressor element 1 (Gse1), transcript variant 1, mRNA [NM_198671]	GO:0003674(molecular_function)|GO:0005575(cellular_component)|GO:0008150(biological_process)	ACCTTGAATATTTAATATTTTTCACTGGGAGGTTTGAAGCTTACAAATTGAGAACGTGCC	177.614	322	93.9	79.3	153	172	282	244	162	280	152	229	147	388	182	262	1.72524	3.5309	2.62807	2.04661
A_51_P117115	Olfr53	olfactory receptor 53	ref|NM_146960|ens|ENSMUST00000084456|gb|BC120694|gb|BC119325	Mus musculus olfactory receptor 53 (Olfr53), mRNA [NM_146960]	GO:0004871(signal transducer activity)|GO:0004930(G-protein coupled receptor activity)|GO:0004984(olfactory receptor activity)|GO:0007165(signal transduction)|GO:0007186(G-protein coupled receptor signaling pathway)|GO:0007608(sensory perception of smell)|GO:0016020(membrane)|GO:0016021(integral to membrane)|GO:0050896(response to stimulus)|GO:0050911(detection of chemical stimulus involved in se…	CCTATATCAGTCCTGCTTCCAGCTACAGCCCAGAAAGAAGCAAATTTACCTCAGTGCTAT	85.005	56.5	38.2	42.7	23.7	57.4	65.2	71.7	68.9	147	64.5	43.2	145	39.5	75.7	47.1	1.80366	3.44262	2.62314	1.90868
A_51_P100298	Stx3	syntaxin 3	ref|NM_152220|ens|ENSMUST00000069285|gb|AK170105|gb|D29797	Mus musculus syntaxin 3 (Stx3), transcript variant A, mRNA [NM_152220]	GO:0005484(SNAP receptor activity)|GO:0005515(protein binding)|GO:0005623(cell)|GO:0005886(plasma membrane)|GO:0005911(cell-cell junction)|GO:0006810(transport)|GO:0006836(neurotransmitter transport)|GO:0006886(intracellular protein transport)|GO:0006887(exocytosis)|GO:0016020(membrane)|GO:0016021(integral to membrane)|GO:0016192(vesicle-mediated transport)|GO:0016324(apical plasma membrane)|GO:0…	ATCGCCATGCTGGTGGAAAATCAGGGGGAGATGTTAGATAACATAGAGTTGAATGTCATG	47.953	51.2	15.5	34.7	48.6	67.5	56.8	64.1	56.5	53.8	52.2	75.3	36.7	70.7	56.9	47.5	3.64516	1.55043	2.5978	0.42534
A_30_P01025510			chr13:62376235-62376890_F	lincRNA:chr13:62376235-62376890 forward strand		GGAGCACATACTGGGGACACCTTATGAATGCACTCACAGGTCTATATTGTTCATCCTCTA	42.2102	39.6	16.3	34.5	12.7	42	34.3	28.6	59.4	53.3	25.1	49.5	8.98	127	58.9	10.4	3.64417	1.54493	2.59455	0.423945
A_30_P01018503			chr9:65376063-65390480_F	lincRNA:chr9:65376063-65390480 forward strand		AAAGGAGCGCTCTCCTCCTGCCAGGCACACCTGTTGAGCAGGACCTCAGAAGAACACAAT	261.502	345	129	188	166	187	228	291	216	657	186	267	156	221	191	325	1.67442	3.49468	2.58455	2.0871
A_55_P2019896	D730005E14Rik	RIKEN cDNA D730005E14 gene	ref|NR_030675|gb|AK035732|gb|AK037689|gb|AK143849	Mus musculus RIKEN cDNA D730005E14 gene (D730005E14Rik), long non-coding RNA [NR_030675]		ATCGCAAAGAGAAAGGGAAACTAACTGATGGTAGAGAGAAGCTGATGCCGACCGCGGTGA	41.5	63.7	24.9	40.5	28.4	66	65.8	72.6	76.5	84.7	39.5	26.5	16.2	48.9	60.7	34	3.07229	2.09136	2.58182	0.680717
A_55_P2117721	BC005764	cDNA sequence BC005764	ref|NM_001170935|ens|ENSMUST00000167250|gb|BC098099|tc|TC1596216	Mus musculus cDNA sequence BC005764 (BC005764), transcript variant 2, mRNA [NM_001170935]	GO:0003824(catalytic activity)|GO:0005515(protein binding)|GO:0005575(cellular_component)|GO:0008150(biological_process)|GO:0008195(phosphatidate phosphatase activity)|GO:0016020(membrane)|GO:0016021(integral to membrane)|GO:0016787(hydrolase activity)	CAGGAAGCAGAAGAACCGTGCAGTCAGTTGGCAAAGAAATTCCGGATCAGGCAAGAAAAA	30.1493	66.1	20.1	32	15.1	45.3	46.3	55.1	60.2	69.2	51.9	50.7	31.6	42.8	58.5	29.4	2.99502	2.1625	2.57876	0.722031
A_51_P140207	1700029H14Rik	RIKEN cDNA 1700029H14 gene	ref|NM_025601|gb|BC049575|gb|AK006340|ens|ENSMUST00000134023	Mus musculus RIKEN cDNA 1700029H14 gene (1700029H14Rik), transcript variant 1, mRNA [NM_025601]	GO:0003674(molecular_function)|GO:0005575(cellular_component)|GO:0008150(biological_process)	ACACAAAGAAGAAGGCAAAGGAAAACTCCAGTGCTTTGGAGAAGAACCATCAGTCATCTC	64.2344	50.8	22.5	34.6	16.6	40	47.9	40.3	79.2	56.3	34.2	27.1	25.4	28.3	50.8	14.5	3.52	1.62717	2.57358	0.462264
A_55_P2103324	Mknk2	MAP kinase-interacting serine/threonine kinase 2	gb|AK177092|gb|AK183867|gb|AK186848|gb|AK188571	Mus musculus cDNA, clone:Y0G0101J01, strand:plus, reference:ENSEMBL:Mouse-Transcript-ENST:ENSMUST00000003433, based on BLAT search. [AK177092]	GO:0000166(nucleotide binding)|GO:0004672(protein kinase activity)|GO:0004674(protein serine/threonine kinase activity)|GO:0005515(protein binding)|GO:0005524(ATP binding)|GO:0005622(intracellular)|GO:0005634(nucleus)|GO:0005737(cytoplasm)|GO:0006417(regulation of translation)|GO:0006468(protein phosphorylation)|GO:0006915(apoptotic process)|GO:0007243(intracellular protein kinase cascade)|GO:001…	CGGACTGAAGATGGTGCAGAAGAGAACAGCCGAACTTCAGGGCTTCCACCGTTCGTTCAA	83.785	64.9	34.4	33.2	34.6	55.9	81.3	65.8	81.8	89.6	76.2	100	31.5	43.5	118	64.3	2.37791	2.6988	2.53835	1.13495
A_51_P286737	Ccl2	chemokine (C-C motif) ligand 2	ref|NM_011333|ens|ENSMUST00000124479|ens|ENSMUST00000000193|gb|AK153468	Mus musculus chemokine (C-C motif) ligand 2 (Ccl2), mRNA [NM_011333]	GO:0001525(angiogenesis)|GO:0001664(G-protein coupled receptor binding)|GO:0001938(positive regulation of endothelial cell proliferation)|GO:0005125(cytokine activity)|GO:0005515(protein binding)|GO:0005576(extracellular region)|GO:0005615(extracellular space)|GO:0005737(cytoplasm)|GO:0006874(cellular calcium ion homeostasis)|GO:0006935(chemotaxis)|GO:0006954(inflammatory response)|GO:0006955(imm…	TGTAGGAGTGACCAGTGTGACAGTGAACTAGTGTGACTCGGACTGTGATGCCTTAATTAA	65.566	113	43.3	54.6	37.6	52.5	52.6	76.5	105	143	55.2	62.6	1130	1330	63.1	82.1	2.42494	2.61905	2.52199	1.08005
A_30_P01031728			chr5:122047900-122065325_F	lincRNA:chr5:122047900-122065325 forward strand		CAGGGGGTACACCTTCTGTTCTATAAACTGCACCAGCTGCTCATACAACTTTCTGACCGC	20.1955	36.9	20.3	31.7	29.8	25.3	83.4	83.8	68.8	50.6	60.5	39.8	41.5	28.2	117	51	3.38916	1.59621	2.49269	0.470976
A_51_P286737	Ccl2	chemokine (C-C motif) ligand 2	ref|NM_011333|ens|ENSMUST00000124479|ens|ENSMUST00000000193|gb|AK153468	Mus musculus chemokine (C-C motif) ligand 2 (Ccl2), mRNA [NM_011333]	GO:0001525(angiogenesis)|GO:0001664(G-protein coupled receptor binding)|GO:0001938(positive regulation of endothelial cell proliferation)|GO:0005125(cytokine activity)|GO:0005515(protein binding)|GO:0005576(extracellular region)|GO:0005615(extracellular space)|GO:0005737(cytoplasm)|GO:0006874(cellular calcium ion homeostasis)|GO:0006935(chemotaxis)|GO:0006954(inflammatory response)|GO:0006955(imm…	TGTAGGAGTGACCAGTGTGACAGTGAACTAGTGTGACTCGGACTGTGATGCCTTAATTAA	81.4707	118	36.4	63.9	43.6	64.3	63.5	77	91.7	157	58.5	69.1	1230	1460	94.6	83.2	2.51923	2.45696	2.4881	0.975283
A_55_P2081050	Kcnj13	potassium inwardly-rectifying channel, subfamily J, member 13	ref|NM_001110227|ens|ENSMUST00000113212|tc|TC1605858|nap|NAP101622-1	Mus musculus potassium inwardly-rectifying channel, subfamily J, member 13 (Kcnj13), mRNA [NM_001110227]	GO:0005242(inward rectifier potassium channel activity)|GO:0005244(voltage-gated ion channel activity)|GO:0006810(transport)|GO:0006811(ion transport)|GO:0006813(potassium ion transport)|GO:0016020(membrane)|GO:0016021(integral to membrane)|GO:0034765(regulation of ion transmembrane transport)	CATATCAATGGACAAAGCATTGACAATTTCCAGATTGCTGAAACAGGGCTGACAGAATAA	241.595	275	143	209	337	405	345	647	367	503	410	406	420	406	915	647	2.56643	2.4067	2.48657	0.93776
A_55_P2044074	Gucy2e	guanylate cyclase 2e	ref|NM_008192|ens|ENSMUST00000108665|ens|ENSMUST00000108664|ens|ENSMUST00000021259	Mus musculus guanylate cyclase 2e (Gucy2e), mRNA [NM_008192]	GO:0000166(nucleotide binding)|GO:0004383(guanylate cyclase activity)|GO:0004672(protein kinase activity)|GO:0005524(ATP binding)|GO:0005525(GTP binding)|GO:0005886(plasma membrane)|GO:0006182(cGMP biosynthetic process)|GO:0006468(protein phosphorylation)|GO:0007601(visual perception)|GO:0009190(cyclic nucleotide biosynthetic process)|GO:0016020(membrane)|GO:0016021(integral to membrane)|GO:00167…	ACCATGGTATCAGCCTGCAGGAGATTCCCCCAGAGAGACGCAAGAAGCTGGAGAAAGCCA	48.5067	30.4	14.7	34.3	9.61	36.6	46.2	33.1	50.6	52.1	35.9	23.6	30	42.5	55.3	32.5	3.44218	1.51895	2.48056	0.441276
A_55_P1996290	5730422E09Rik	RIKEN cDNA 5730422E09 gene	gb|AK031519|riken|6030447B10	Mus musculus 13 days embryo male testis cDNA, RIKEN full-length enriched library, clone:6030447B10 product:unclassifiable, full insert sequence. [AK031519]	GO:0003674(molecular_function)|GO:0005575(cellular_component)|GO:0008150(biological_process)	GGAGCAGATAAATAGCTCGAGGAAAGTCCCTTATAGTTGTGATGTCACCTGCAGATACTT	37.2334	65.4	26	45.7	36.5	65.9	70.2	64	88.3	70.9	69.6	52.4	55	94.7	53.1	54.1	3.39615	1.55142	2.47379	0.456817
A_51_P286737	Ccl2	chemokine (C-C motif) ligand 2	ref|NM_011333|ens|ENSMUST00000124479|ens|ENSMUST00000000193|gb|AK153468	Mus musculus chemokine (C-C motif) ligand 2 (Ccl2), mRNA [NM_011333]	GO:0001525(angiogenesis)|GO:0001664(G-protein coupled receptor binding)|GO:0001938(positive regulation of endothelial cell proliferation)|GO:0005125(cytokine activity)|GO:0005515(protein binding)|GO:0005576(extracellular region)|GO:0005615(extracellular space)|GO:0005737(cytoplasm)|GO:0006874(cellular calcium ion homeostasis)|GO:0006935(chemotaxis)|GO:0006954(inflammatory response)|GO:0006955(imm…	TGTAGGAGTGACCAGTGTGACAGTGAACTAGTGTGACTCGGACTGTGATGCCTTAATTAA	85.4211	121	36	63.9	41.9	75.1	77.9	78.1	91.7	153	62	62.5	1210	1500	83.1	98.9	2.54722	2.39437	2.47079	0.939991
A_30_P01023803			chr12:72103832-72116875_R	lincRNA:chr12:72103832-72116875 reverse strand		CCTAGGGAACTAAGTGCAAGTAAGATACATAGCAGGATTAAGCATAGAAAGTTAATCTAA	53.6603	73.4	26.4	24.9	57.5	69.4	68.4	63.5	56.5	69.3	69.6	69.6	43	80.3	83.7	41.7	2.14015	2.78313	2.46164	1.30044
A_55_P2168497	Slc9a1	solute carrier family 9 (sodium/hydrogen exchanger), member 1	ref|NM_016981|ens|ENSMUST00000030669|gb|BC052708|gb|AK154857	Mus musculus solute carrier family 9 (sodium/hydrogen exchanger), member 1 (Slc9a1), mRNA [NM_016981]	GO:0001101(response to acid)|GO:0002026(regulation of the force of heart contraction)|GO:0005516(calmodulin binding)|GO:0005737(cytoplasm)|GO:0005739(mitochondrion)|GO:0005783(endoplasmic reticulum)|GO:0005886(plasma membrane)|GO:0006810(transport)|GO:0006811(ion transport)|GO:0006812(cation transport)|GO:0006814(sodium ion transport)|GO:0006885(regulation of pH)|GO:0009986(cell surface)|GO:00104…	GGACAAGGAGGAAGAGATCCGCAAAATCTTGAGGAGCAATCTGCAGAAAACCCGGCAACG	88.2996	113	47.9	73.9	79.5	124	135	101	147	137	84.6	118	72.2	141	75.2	96.9	3.06889	1.85386	2.46138	0.60408
A_66_P137660	Fam166b	family with sequence similarity 166, member B	ref|NM_177377|ref|NM_001162381|ens|ENSMUST00000052829|gb|AK053208	Mus musculus family with sequence similarity 166, member B (Fam166b), transcript variant 1, mRNA [NM_177377]	GO:0003674(molecular_function)|GO:0005575(cellular_component)|GO:0008150(biological_process)	AGAGAGGTGGGTCGGGGAGGGGCACAAAGAAAATGGCTTGGAGGCTGAGCACCTTTTTAT	175.608	220	89.9	158	134	208	211	190	294	259	182	176	269	288	242	165	3.2703	1.63924	2.45477	0.501251
A_30_P01026336			chr6:126502067-126507755_R	lincRNA:chr6:126502067-126507755 reverse strand		TGAGGAGCCAAGAGCATCCCCAAGACTGAGTAAGTAAAGCAATGGAGGACCCCAGGGCTC	33.4116	32.9	24.2	34.1	24.5	40.3	74.8	63.1	80.3	53.7	43.8	22.5	16.4	51.7	74.5	45.4	3.31818	1.57478	2.44648	0.474591
A_55_P2069730			nap|NAP111933-1			TTGGAAGCCTGGGAGATAAGATAAACTCCAAGGAGGAAGAAACTGGAAAATGGGGTTCCT	53.8457	114	65.6	68.1	76.8	139	98.1	98.5	120	207	95.7	273	114	185	105	90.8	1.82927	3.03965	2.43446	1.66167
A_52_P439358	Kl	klotho	ref|NM_013823|ens|ENSMUST00000078856|gb|AK134616|gb|AB005141	Mus musculus klotho (Kl), mRNA [NM_013823]	GO:0002526(acute inflammatory response)|GO:0004553(hydrolase activity, hydrolyzing O-glycosyl compounds)|GO:0004566(beta-glucuronidase activity)|GO:0005104(fibroblast growth factor receptor binding)|GO:0005515(protein binding)|GO:0005576(extracellular region)|GO:0005886(plasma membrane)|GO:0005975(carbohydrate metabolic process)|GO:0006112(energy reserve metabolic process)|GO:0007568(aging)|GO:00…	TGAGTGGTCTTATTGATAACCCTGATACCAGATCAGGCAAGATAAATCCGTCATAGCAGG	59.2491	74.4	48.4	67	100	128	86.8	97.1	127	149	150	205	103	112	324	304	2.62397	2.22388	2.42392	0.847526
A_30_P01018750			chr10:121498271-121512171_R	lincRNA:chr10:121498271-121512171 reverse strand		GAGCACTGTGTAAGGACTGGACAATGCAGTTCCTGAAAAGAAATGGAGGTTTTGTCAACA	91.3363	163	24.8	81.9	55.4	104	38.5	49.3	65	182	46.3	84.1	46.1	71.5	54.4	33.8	2.62097	2.22222	2.42159	0.847863
A_55_P2070492	Vmn2r59	vomeronasal 2, receptor 59	ref|NM_001105056|ref|NR_028441|ens|ENSMUST00000168489|gb|AF022253	Mus musculus vomeronasal 2, receptor 59 (Vmn2r59), mRNA [NM_001105056]	GO:0003674(molecular_function)|GO:0004871(signal transducer activity)|GO:0004930(G-protein coupled receptor activity)|GO:0005575(cellular_component)|GO:0005886(plasma membrane)|GO:0007165(signal transduction)|GO:0007186(G-protein coupled receptor signaling pathway)|GO:0008150(biological_process)|GO:0016020(membrane)|GO:0016021(integral to membrane)	GATACAACTAATTATCTGTGGAATCTGGGTGGTTACCTCTCCACCCTTCATTGATCAAGA	28.008	26.1	26.9	25.9	51.2	52.9	83.1	99.2	58.8	68.8	39.4	44.1	43.1	47.4	59.4	54.4	2.18587	2.65637	2.42112	1.21524
A_52_P254825	Spata4	spermatogenesis associated 4	ref|NM_133711|ens|ENSMUST00000033917|gb|AF530515|gb|AK005612	Mus musculus spermatogenesis associated 4 (Spata4), mRNA [NM_133711]	GO:0005515(protein binding)|GO:0005737(cytoplasm)|GO:0008150(biological_process)	AAGGACATGGAGGAAGTAGCTTAGAAGAAGTGATATCACTAATGTCTACCACAGTCTGAG	87.4605	105	49.2	62.2	11.2	39.8	46.9	25.5	74.9	205	36.2	27.7	37.5	80.4	42.9	23.8	1.52236	3.29582	2.40909	2.16494
A_55_P1998471	S100a9	S100 calcium binding protein A9 (calgranulin B)	ref|NM_001281852|ref|NM_009114|ens|ENSMUST00000117167|ens|ENSMUST00000069960	Mus musculus S100 calcium binding protein A9 (calgranulin B) (S100a9), transcript variant 1, mRNA [NM_001281852]	GO:0002523(leukocyte migration involved in inflammatory response)|GO:0005509(calcium ion binding)|GO:0005576(extracellular region)|GO:0005615(extracellular space)|GO:0005634(nucleus)|GO:0005737(cytoplasm)|GO:0005856(cytoskeleton)|GO:0005886(plasma membrane)|GO:0006914(autophagy)|GO:0006915(apoptotic process)|GO:0006919(activation of cysteine-type endopeptidase activity involved in apoptotic proce…	GTCTAAAGGGAATGGCTTACTCAATGGCCTTTGTTCTGGGAAATGATAAGATAAATAATA	119.764	163	90.1	107	318	345	239	268	193	278	289	365	1340	1350	301	216	2.14206	2.59813	2.3701	1.21291
A_30_P01020165			chr12:111287772-111333890_F	lincRNA:chr12:111287772-111333890 forward strand		AAATAGCTGCCTAACAGAAGGAAAAGGGTAGAGGGGCAGCTGGTCCCCAGGCCAGATCTG	61.0152	53.1	30.3	41.7	40	44.1	73.1	58.6	77.7	90.7	56	53.4	45.7	68.2	42.6	26.8	2.56436	2.17506	2.36971	0.848189
A_51_P351015	Lta	lymphotoxin A	ref|NM_010735|ens|ENSMUST00000025266|gb|AK156659|gb|AK080308	Mus musculus lymphotoxin A (Lta), mRNA [NM_010735]	GO:0002876(positive regulation of chronic inflammatory response to antigenic stimulus)|GO:0002925(positive regulation of humoral immune response mediated by circulating immunoglobulin)|GO:0005125(cytokine activity)|GO:0005164(tumor necrosis factor receptor binding)|GO:0005576(extracellular region)|GO:0005615(extracellular space)|GO:0006927(transformed cell apoptotic process)|GO:0006954(inflammato…	AGGGGAAAAATAGAAAGCCGTCAGATGACAACTAGGTCCCAGACACAAAGGTGTCTCACC	80.3318	60.2	37.3	36.3	29.4	71.6	78.6	45.8	98.9	75.3	47.4	31.2	39.7	68.4	59.8	33.6	2.65147	2.07438	2.36293	0.78235
A_66_P130612	2810408A11Rik	RIKEN cDNA 2810408A11 gene	ref|NM_027419|ens|ENSMUST00000142121|ens|ENSMUST00000137122|ens|ENSMUST00000102580	Mus musculus RIKEN cDNA 2810408A11 gene (2810408A11Rik), mRNA [NM_027419]	GO:0003674(molecular_function)|GO:0005575(cellular_component)|GO:0008150(biological_process)	GTACGGAGACAACAAAAACTCAAAGGACACAGACAACTTTGCCAAGACATACTCCAGTGA	105.518	118	26.3	28.1	21.8	37.7	119	43.7	69.3	58.5	46.1	32.1	24.5	61.7	56.2	32.3	2.63498	2.08185	2.35842	0.790082
A_51_P303316	Hoxa13	homeobox A13	ref|NM_008264|ens|ENSMUST00000047993|tc|TC1596727|nap|NAP057369-1	Mus musculus homeobox A13 (Hoxa13), mRNA [NM_008264]	GO:0001570(vasculogenesis)|GO:0001886(endothelial cell morphogenesis)|GO:0001894(tissue homeostasis)|GO:0003281(ventricular septum development)|GO:0003677(DNA binding)|GO:0003700(sequence-specific DNA binding transcription factor activity)|GO:0005515(protein binding)|GO:0005634(nucleus)|GO:0006351(transcription, DNA-dependent)|GO:0006355(regulation of transcription, DNA-dependent)|GO:0007275(mult…	GACCACTAGTTAATGGATTAAAAGGTGGAGCAGAGGGCAGCTTGAAGAAACGCTTAAGGA	32.4212	43.4	38.2	31.4	26.1	47.6	54.9	40	110	55.8	54.8	27.7	29	61.7	53.6	33.1	2.87958	1.77707	2.32833	0.617128
A_52_P359819	Ntf5	neurotrophin 5	ref|NM_198190|ens|ENSMUST00000058879|gb|AK019330|gb|BC052191	Mus musculus neurotrophin 5 (Ntf5), mRNA [NM_198190]	GO:0005102(receptor binding)|GO:0005166(neurotrophin p75 receptor binding)|GO:0005576(extracellular region)|GO:0007402(ganglion mother cell fate determination)|GO:0007616(long-term memory)|GO:0008052(sensory organ boundary specification)|GO:0008083(growth factor activity)|GO:0008344(adult locomotory behavior)|GO:0008544(epidermis development)|GO:0042490(mechanoreceptor differentiation)	CCCTGGCTCATCAAAACGGACGAGGAAAGAACGCATGAAAAGGGGATGCATGATGCATGC	92.352	84.6	34.9	54	57.7	120	85.2	79.3	107	83.8	76.2	67.6	55.3	115	83.5	59	3.0659	1.55185	2.30888	0.506165
A_52_P380369	Phf11d	PHD finger protein 11D	gb|BC030186|tc|TC1651122|tc|TC1586768	Mus musculus DNA segment, Chr 14, ERATO Doi 668, expressed, mRNA (cDNA clone MGC:29273 IMAGE:5067268), complete cds. [BC030186]	GO:0003674(molecular_function)|GO:0005575(cellular_component)|GO:0005634(nucleus)|GO:0006351(transcription, DNA-dependent)|GO:0006355(regulation of transcription, DNA-dependent)|GO:0008150(biological_process)|GO:0008270(zinc ion binding)|GO:0046872(metal ion binding)	AAGAAAGGCAAAGGCAGATGAAGAAGCAGCTTGAGGCACTTGCAGACTTACAACAAACCT	91.285	90.3	49	64	91.5	109	95.5	87.9	142	110	106	109	462	412	123	82.9	2.89796	1.71875	2.30835	0.59309
A_30_P01025657			chr13:73472571-73483846_F	lincRNA:chr13:73472571-73483846 forward strand		CCTCACTTGGGAGAGGAGAGGAGCAAGCAGAGAATTTTTATAGAAGAAGCCCACTCTTCC	48.1471	58	33	31.8	35.9	55.8	52.9	48.3	79.2	69.7	37.6	33.1	41.6	34	87.7	39.5	2.4	2.19182	2.29591	0.91326
A_55_P2029217			gb|U21455|gb|X14387|tc|NP055721|tc|TC1696355	Mus musculus isolate SB2-28a T-cell receptor Va4/Ja37 alpha chain mRNA, partial cds. [U21455]		ATATCCTGGAGAAGGTCCACAGCTCCTTTTGAAAGTCACAACAGCCAACAATAAGGGAAG	21.1089	25.2	23.1	28.7	60.5	60.4	118	123	58.7	58.7	77.6	44.8	57.1	79.9	82.2	84.3	2.54113	2.0453	2.29321	0.804878
A_30_P01018355			chr13:108577843-108679708_R	lincRNA:chr13:108577843-108679708 reverse strand		AAGGACATATTTTATTGTGCCCATGTTGTGGCACTGTCTTTATACCGCATCCGCAAGCCA	63.7029	72.1	56.6	77.6	55.8	81.3	65.8	76.1	169	124	49	70.1	55.8	55.1	62.4	58.9	2.98587	1.59794	2.2919	0.535167
A_55_P2150796	Ccdc85c	coiled-coil domain containing 85C	ref|NM_001159910|ens|ENSMUST00000136175|nap|NAP059558-1	Mus musculus coiled-coil domain containing 85C (Ccdc85c), mRNA [NM_001159910]	GO:0003674(molecular_function)|GO:0005923(tight junction)|GO:0007275(multicellular organismal development)|GO:0021987(cerebral cortex development)|GO:0030054(cell junction)|GO:0043296(apical junction complex)	TGAGAACCTTGACCGGCAACTTCAAGACAGCTGTGAGGAGGACCTGAGCGAGAAGGAGAA	42.5413	42.4	24.1	33.9	32.9	39.5	49.2	13.1	69.2	57.7	44.2	32.2	32.8	34.4	63.6	24.4	2.87137	1.70206	2.28672	0.592771
A_51_P194853	Sec14l4	SEC14-like 4 (S. cerevisiae)	ref|NM_146013|ens|ENSMUST00000136222|ens|ENSMUST00000019512|gb|AK028954	Mus musculus SEC14-like 4 (S. cerevisiae) (Sec14l4), mRNA [NM_146013]	GO:0003674(molecular_function)|GO:0005215(transporter activity)|GO:0005575(cellular_component)|GO:0005622(intracellular)|GO:0006810(transport)|GO:0008289(lipid binding)|GO:0016021(integral to membrane)	ATTGGGGGTTAAATGCCAAGAGGCAGTGCCAGGAGAAATTCTTGCCTAAGATCAGCTTAA	20.0472	13	26.4	34.9	20.7	27.4	38.9	44.2	77.7	56.7	23.2	21.6	16.4	42	23.5	21.9	2.94318	1.62464	2.28391	0.552002
A_52_P625270	1700024G13Rik	RIKEN cDNA 1700024G13 gene	ref|NM_001034037|ens|ENSMUST00000100723|gb|BC107222|gb|BC107223	Mus musculus RIKEN cDNA 1700024G13 gene (1700024G13Rik), mRNA [NM_001034037]	GO:0003674(molecular_function)|GO:0005575(cellular_component)|GO:0008150(biological_process)	AGCAGACAGAAGAACACCAGCTATGTCCTCCAGTCTACAGTACCTGCAAAAGGGGCTTAG	80.3344	86	57.1	71.3	69.4	97.1	115	87.7	98.3	202	64.3	39.8	72.3	82.1	103	77.1	1.72154	2.8331	2.27732	1.64568
A_55_P2162175	Ccdc149	coiled-coil domain containing 149	ref|NM_001256059|ens|ENSMUST00000059428|tc|TC1631245	Mus musculus coiled-coil domain containing 149 (Ccdc149), mRNA [NM_001256059]	GO:0003674(molecular_function)|GO:0005575(cellular_component)|GO:0008150(biological_process)	GTGTGGGAGGTAACAGAGGCATCTCAGAGGGCGGAGACACAAGGAGTACTGTGCATACAT	95.8109	141	74.4	108	130	206	192	209	176	236	171	175	156	203	154	177	2.36559	2.18519	2.27539	0.923737
A_55_P2151388	Sostdc1	sclerostin domain containing 1	ref|NM_025312|ens|ENSMUST00000041407|gb|AY134666|gb|AK007935	Mus musculus sclerostin domain containing 1 (Sostdc1), mRNA [NM_025312]	GO:0005515(protein binding)|GO:0005576(extracellular region)|GO:0005615(extracellular space)|GO:0007389(pattern specification process)|GO:0010454(negative regulation of cell fate commitment)|GO:0016055(Wnt receptor signaling pathway)|GO:0030514(negative regulation of BMP signaling pathway)|GO:0031069(hair follicle morphogenesis)|GO:0042475(odontogenesis of dentin-containing tooth)|GO:0060648(mamm…	TCTCAAGATGTAATGAGTAGTTTGCAGTGAAAGCCAGGCATCCTGTAGTTTCCATCCCCT	453.975	806	162	222	128	165	104	143	412	445	188	263	70.8	86.8	210	318	2.54321	2.0045	2.27386	0.788179
A_55_P2014154	Cacna1c	calcium channel, voltage-dependent, L type, alpha 1C subunit	ref|NM_001256002|ref|NM_001255998|ref|NM_001255997|ref|NM_001255999	Mus musculus calcium channel, voltage-dependent, L type, alpha 1C subunit (Cacna1c), transcript variant 10, mRNA [NM_001256002]	GO:0002095(caveolar macromolecular signaling complex)|GO:0005216(ion channel activity)|GO:0005244(voltage-gated ion channel activity)|GO:0005245(voltage-gated calcium channel activity)|GO:0005262(calcium channel activity)|GO:0005515(protein binding)|GO:0005516(calmodulin binding)|GO:0005623(cell)|GO:0005634(nucleus)|GO:0005737(cytoplasm)|GO:0005886(plasma membrane)|GO:0005891(voltage-gated calciu…	TGACGCCTGCGACATGACAATAGAGGAGATGGAGAACGCCGCAGACAACATCCTCAGTGG	60.5207	59.9	45.6	61.9	68.9	70.1	109	43.3	114	126	83.3	53.1	59.3	71.2	72.6	54.1	2.5	2.03554	2.26777	0.814216
A_55_P1953508	Mob3c	MOB kinase activator 3C	ref|NM_175308|ens|ENSMUST00000030477|gb|AK084014|gb|BC099740	Mus musculus MOB kinase activator 3C (Mob3c), mRNA [NM_175308]	GO:0003674(molecular_function)|GO:0005575(cellular_component)|GO:0008150(biological_process)|GO:0016301(kinase activity)|GO:0016310(phosphorylation)|GO:0016740(transferase activity)|GO:0046872(metal ion binding)	ACAGGGGAGGGGGGAGGAGGGAAATCTATTTTTGTGAAAAGAAAGATTTTGCTATTTTTT	55.6414	71.6	59.3	53.1	82.2	65.3	76.9	94.2	126	125	87.9	75.7	101	111	111	65.1	2.12479	2.35405	2.23942	1.1079
A_30_P01022759			chr7:106525007-106525661_R	lincRNA:chr7:106525007-106525661 reverse strand		TACAATCTGTAAAAGCAGGACTGTAGAAGCAGGGGACACACACCAAGAAGACATTATGGC	44.9136	29.3	19.8	28.8	14.7	49.5	43.8	40	52.1	53.2	126	29.7	26.1	62.6	35.1	22	2.63131	1.84722	2.23927	0.702015
A_30_P01018625			chr12:45415565-45423519_R	lincRNA:chr12:45415565-45423519 reverse strand		AACATAGAACCACAAAGCCCTGGGGAACTACAAAAAAGACCCAAGACACAGCAACAAAAC	101.18	49.7	42.9	42.3	39.6	59.3	85.1	79.3	124	66.7	85	53.5	50.8	89.1	109	61.4	2.89044	1.57683	2.23364	0.545533
A_55_P2135546	Gm10616	predicted gene 10616	ref|XR_105123|gb|AK139984|riken|B230032P10	PREDICTED: Mus musculus predicted gene 10616 (Gm10616), misc_RNA [XR_105123]		CTGTAAAACCCATAACAGGGCCAAACTCCTGGAGTTATTAAAGATGACATGGTTACATGG	32.327	32.2	27.3	43.2	36.9	31.1	59.5	70.7	57.9	101	38.7	58.8	51.7	78.9	54	40.9	2.12088	2.33796	2.22942	1.10236
A_55_P2030583	Lrriq1	leucine-rich repeats and IQ motif containing 1	ref|NM_029134|ens|ENSMUST00000020043|gb|BC051400|tc|TC1599571	Mus musculus leucine-rich repeats and IQ motif containing 1 (Lrriq1), transcript variant 2, mRNA [NM_029134]	GO:0003674(molecular_function)|GO:0005575(cellular_component)|GO:0008150(biological_process)	CCATTCTCCAGTATGGCCCTTGGAAATCTTTAAAGCAGGTATTTATAATTTAGCAATACT	59.2669	41.8	27.6	30.5	21	39.8	35.4	47.5	70.5	56.9	37	116	20.7	113	57.7	43.5	2.55435	1.86557	2.20996	0.730352
A_30_P01019032			KCNQ1ot1	lincRNA:chr7:150399015-150482452 forward strand		GAAAAGCACACTAAGGTGTACTAGACCGTAACCACGCCGAGGAGAAGCCCACCGAAGTAA	33.712	39.3	43.7	22.9	18.6	23	58.9	41	83.7	57.1	55.2	21.7	10.5	54.6	65.4	38.3	1.91533	2.49345	2.20439	1.30184
A_30_P01025075			chr14:20893694-20903726_F	lincRNA:chr14:20893694-20903726 forward strand		ACCAACCAGAGGAGAACCTTCAAGAAGGTGATGTTAGTCAGGAAAGACTGGCGGCAGGAG	34.1966	36.4	18.4	31.4	31.9	89.3	35.5	51.9	50.4	51.2	39.2	31.7	278	66.9	32.9	30.5	2.73913	1.63057	2.18485	0.595289
A_52_P246698	Fam126a	family with sequence similarity 126, member A	ref|NM_053090|ens|ENSMUST00000030849|gb|AK161265|gb|AK155209	Mus musculus family with sequence similarity 126, member A (Fam126a), mRNA [NM_053090]	GO:0003674(molecular_function)|GO:0005737(cytoplasm)|GO:0005886(plasma membrane)|GO:0008150(biological_process)|GO:0016020(membrane)	GGTGCCATGAAATCTAGTAAGGAAGGTACAAGGTGTATTCAAGTGGAGATCACACCAACC	69.6668	108	20.4	32.9	16.4	38.5	28.4	38.2	56.5	52.2	31.6	15.9	132	55.1	23.6	28.9	2.76961	1.58663	2.17812	0.57287
A_30_P01032646			chr1:196802568-196847687_F	lincRNA:chr1:196802568-196847687 forward strand		AACAGGGGTGCGGCGACTTGGAGAAGCTTCGTGGAAGGGAAGCAGAGACAGGTGGTTGAG	88.4515	157	49.8	68.4	63.1	111	103	83.4	140	105	98.9	81.7	70.8	95.7	119	70.6	2.81124	1.53509	2.17317	0.546053
A_51_P286737	Ccl2	chemokine (C-C motif) ligand 2	ref|NM_011333|ens|ENSMUST00000124479|ens|ENSMUST00000000193|gb|AK153468	Mus musculus chemokine (C-C motif) ligand 2 (Ccl2), mRNA [NM_011333]	GO:0001525(angiogenesis)|GO:0001664(G-protein coupled receptor binding)|GO:0001938(positive regulation of endothelial cell proliferation)|GO:0005125(cytokine activity)|GO:0005515(protein binding)|GO:0005576(extracellular region)|GO:0005615(extracellular space)|GO:0005737(cytoplasm)|GO:0006874(cellular calcium ion homeostasis)|GO:0006935(chemotaxis)|GO:0006954(inflammatory response)|GO:0006955(imm…	TGTAGGAGTGACCAGTGTGACAGTGAACTAGTGTGACTCGGACTGTGATGCCTTAATTAA	81.8397	127	58.4	55.7	40.2	71.5	53.7	73.6	97.2	149	73.3	62.8	1080	1370	77.9	81.4	1.66438	2.67504	2.16971	1.60723
A_30_P01022745			chr17:33995525-34028025_F	lincRNA:chr17:33995525-34028025 forward strand		TGTGCCAAGATGGGGCACATGGACTTCGCAGTCTGGGAAAGAAAGAAAGGTAAGAAAATA	16.5212	50.5	20.8	36.5	39.1	42.5	34.6	26.1	58.4	55.4	24.7	41.3	21.7	40.8	32.2	23.3	2.80769	1.51781	2.16275	0.540589
A_51_P307964	Krt13	keratin 13	ref|NM_010662|gb|BC060286|tc|TC1727877|tc|TC1578459	Mus musculus keratin 13 (Krt13), mRNA [NM_010662]	GO:0005198(structural molecule activity)|GO:0005515(protein binding)|GO:0005882(intermediate filament)|GO:0045095(keratin filament)|GO:0070062(extracellular vesicular exosome)	GGCAACGAGAAGATCACCATGCAGAACCTCAATGACCGCCTGGCCAGCTACCTGGATAAG	56.6242	60.2	46.6	45.4	48.8	63.4	94.3	85.2	128	71.2	57.6	46.8	33.1	95.8	124	57.3	2.74678	1.56828	2.15753	0.570953
A_30_P01031304			chr11:48603904-48611829_R	lincRNA:chr11:48603904-48611829 reverse strand		TCCCATAAGATGGAAGGCTAGCAAGTGGCAGAGAAGTCAGAAGGAAACAATACAGAGTCA	42.0612	41.2	22.3	41.5	29.1	37.8	42.1	25.8	57.8	70.6	40.6	43.8	23.1	83.3	52.9	36.3	2.59193	1.7012	2.14657	0.656347
A_66_P108188	Car5a	carbonic anhydrase 5a, mitochondrial	ref|NM_007608|ens|ENSMUST00000057653|gb|X51971|gb|BC030174	Mus musculus carbonic anhydrase 5a, mitochondrial (Car5a), mRNA [NM_007608]	GO:0004089(carbonate dehydratase activity)|GO:0005739(mitochondrion)|GO:0006094(gluconeogenesis)|GO:0006730(one-carbon metabolic process)|GO:0008270(zinc ion binding)|GO:0016829(lyase activity)|GO:0046872(metal ion binding)	TTGATCGGACCAAGATGAGGTCTTAATCTCAGGATGAAGTCTGTAAGGATAGGCAGAGCA	49.2084	57.1	57.2	70.1	119	115	111	125	128	142	110	116	80.7	83.8	101	105	2.23776	2.02568	2.13172	0.905225
A_30_P01030748			chr15:92174226-92201201_F	lincRNA:chr15:92174226-92201201 forward strand		TGCACTCAGGGAGAGATCTGCGTCAGCTGTATTTTTGATCAAAAGTTGTTCCCATAGTGA	36.6506	52.6	37.8	52.7	85	93.7	52.8	72.4	97.1	89.1	68.1	78.1	109	78	99.5	58.6	2.56878	1.6907	2.12974	0.658172
A_30_P01017967			chr3:100363012-100369971_F	lincRNA:chr3:100363012-100369971 forward strand		TCCATGTTGTCTTTTATCAATACTGAACAAGTTTGAGGTGGCAAGTTTTTGGAGTACTGG	55.0815	20.5	27.8	30.5	36.6	45.1	44.2	64.9	53.3	71.2	51.5	73.7	36.3	44.1	48.6	48.7	1.91727	2.33443	2.12585	1.21758
A_51_P286737	Ccl2	chemokine (C-C motif) ligand 2	ref|NM_011333|ens|ENSMUST00000124479|ens|ENSMUST00000000193|gb|AK153468	Mus musculus chemokine (C-C motif) ligand 2 (Ccl2), mRNA [NM_011333]	GO:0001525(angiogenesis)|GO:0001664(G-protein coupled receptor binding)|GO:0001938(positive regulation of endothelial cell proliferation)|GO:0005125(cytokine activity)|GO:0005515(protein binding)|GO:0005576(extracellular region)|GO:0005615(extracellular space)|GO:0005737(cytoplasm)|GO:0006874(cellular calcium ion homeostasis)|GO:0006935(chemotaxis)|GO:0006954(inflammatory response)|GO:0006955(imm…	TGTAGGAGTGACCAGTGTGACAGTGAACTAGTGTGACTCGGACTGTGATGCCTTAATTAA	74.7806	102	45.4	61.6	50.8	61.2	68.2	62.4	83.5	148	39.2	49.8	1130	1460	84.7	78	1.83921	2.4026	2.1209	1.30632
A_55_P1962568			nap|NAP061224-1			CAGGAAAAAGAAAACAGAAGGCATGGAAGAGAATGCTTTGTTGGTTGATGGCTTTACAAG	123.916	106	24.6	42.4	27	60.6	59	66.7	62.4	71.3	39.1	44.7	44.2	65.7	71	40	2.53659	1.6816	2.10909	0.66294
A_55_P2029436						AAAGAGAAAGGAGGAAGGAAAAGGAAATTATAATGATCTCACAACTCCAGTGAGACCCTG	105.349	153	47.7	70.3	36	70.5	95.4	66	119	119	84.2	67.4	76.5	86.4	96.1	36.9	2.49476	1.69275	2.09375	0.678521
A_55_P1994339	Dhrs7c	dehydrogenase/reductase (SDR family) member 7C	ref|NM_001013013|ens|ENSMUST00000040574|ens|ENSMUST00000168612|gb|BC039565	Mus musculus dehydrogenase/reductase (SDR family) member 7C (Dhrs7c), mRNA [NM_001013013]	GO:0004745(retinol dehydrogenase activity)|GO:0005576(extracellular region)|GO:0008152(metabolic process)|GO:0010880(regulation of release of sequestered calcium ion into cytosol by sarcoplasmic reticulum)|GO:0014801(longitudinal sarcoplasmic reticulum)|GO:0016491(oxidoreductase activity)|GO:0033017(sarcoplasmic reticulum membrane)|GO:0055114(oxidation-reduction process)	GAAGAGGGTTAACCTCGTGGCCAAAGGGGTCACTCAAGGGGAATAAAGGCTTTCCTAGAG	73.6399	78.4	30.1	47.1	4.37	45.8	35.7	31.6	74.9	77.1	28.4	9.86	18.3	26	29.7	18.6	2.48837	1.63694	2.06266	0.657837
A_51_P286737	Ccl2	chemokine (C-C motif) ligand 2	ref|NM_011333|ens|ENSMUST00000124479|ens|ENSMUST00000000193|gb|AK153468	Mus musculus chemokine (C-C motif) ligand 2 (Ccl2), mRNA [NM_011333]	GO:0001525(angiogenesis)|GO:0001664(G-protein coupled receptor binding)|GO:0001938(positive regulation of endothelial cell proliferation)|GO:0005125(cytokine activity)|GO:0005515(protein binding)|GO:0005576(extracellular region)|GO:0005615(extracellular space)|GO:0005737(cytoplasm)|GO:0006874(cellular calcium ion homeostasis)|GO:0006935(chemotaxis)|GO:0006954(inflammatory response)|GO:0006955(imm…	TGTAGGAGTGACCAGTGTGACAGTGAACTAGTGTGACTCGGACTGTGATGCCTTAATTAA	75.1696	131	54.5	70.6	44.1	79.6	73.3	80.7	99.2	161	92.3	65.4	1150	1370	74.5	93	1.82018	2.28045	2.05032	1.25287
A_30_P01025232			chr9:36509939-36515389_R	lincRNA:chr9:36509939-36515389 reverse strand		GAAAGGAGATGGACTTGTTTAGGAAGAGAGGAGTGATTTTTGGTCTTGAAAAAACATCCA	53.6954	86.1	29.9	24.7	38.1	62.2	67.3	50	59.6	51.9	59.2	40.8	30.6	56.8	71.8	24.8	1.99331	2.10121	2.04726	1.05413
A_55_P1988428	D830024N08Rik	RIKEN cDNA D830024N08 gene	gb|AK085891|tc|TC1616468|riken|D830024N08	Mus musculus 16 days neonate heart cDNA, RIKEN full-length enriched library, clone:D830024N08 product:unclassifiable, full insert sequence. [AK085891]		AACCCCCAGCGTAAAGGAAAGACAGCAAGGGAATGAATATGTAAAGCAAATAGGTCTACA	76.4109	93.7	36.1	51.8	18.9	45.3	103	44.3	91.8	80.1	66.8	55.9	23.1	89	94.6	33.5	2.54294	1.54633	2.04463	0.608089
A_52_P2706	Mypn	myopalladin	ref|NM_182992|ens|ENSMUST00000095580|gb|BC052872|gb|AK220521	Mus musculus myopalladin (Mypn), mRNA [NM_182992]	GO:0003779(actin binding)|GO:0005634(nucleus)|GO:0005737(cytoplasm)|GO:0008092(cytoskeletal protein binding)|GO:0015630(microtubule cytoskeleton)|GO:0017124(SH3 domain binding)|GO:0030018(Z disc)|GO:0031674(I band)|GO:0045214(sarcomere organization)|GO:0051371(muscle alpha-actinin binding)	AGCCAAAATGTGCCTGAGATTTAAAGAGAAAACAAAAAACAAAACGGGAGAGGGTTTCCT	69.7587	89.6	39.6	58.5	25.8	53.9	55.1	53.1	90.9	103	62.7	25.7	43.4	38.8	70	36.2	2.29545	1.76068	2.02807	0.767031
A_52_P670026	Rsad2	radical S-adenosyl methionine domain containing 2	ref|NM_021384|ens|ENSMUST00000137792|ens|ENSMUST00000020970|gb|AK159147	Mus musculus radical S-adenosyl methionine domain containing 2 (Rsad2), mRNA [NM_021384]	GO:0001503(ossification)|GO:0003824(catalytic activity)|GO:0005515(protein binding)|GO:0005739(mitochondrion)|GO:0005741(mitochondrial outer membrane)|GO:0005743(mitochondrial inner membrane)|GO:0005783(endoplasmic reticulum)|GO:0005789(endoplasmic reticulum membrane)|GO:0005811(lipid particle)|GO:0009615(response to virus)|GO:0016020(membrane)|GO:0030278(regulation of ossification)|GO:0034157(po…	TGTTTGGAGTTTGGAGTCTAATGGTTGCATAGATAAACAGGCGACCAATCACACCCAGCA	78.2539	109	47.9	72	124	144	150	146	99.8	139	135	207	591	701	142	123	2.08351	1.93056	2.00703	0.926589
A_30_P01033245			chr4:123361002-123364781_R	lincRNA:chr4:123361002-123364781 reverse strand		AGAAATGACCCCGGGAACTCCGGAGCCGCTGCGAGGGGAGGGACCGCGAGAGGACACGAG	40.2878	75.4	32.1	43.8	35.5	51.9	70.7	39.8	76.2	70.4	62	47	45.3	60.3	64.6	52.5	2.37383	1.60731	1.99057	0.677093
A_55_P2045976			gb|GU599378|gb|GU599295|gb|GU599307|gb|JX520871	Mus musculus clone 115289867481303B T-cell receptor beta chain (TCRB) mRNA, partial cds. [GU599378]		GAAGATCCAGAGCACGCAACCCCAGGACTCAGCGGTGTATCTTTGTGCAAGCAGCTTAGA	58.4105	41.1	27	47.2	38.5	57.9	95.2	51.2	61.2	80.3	63.3	55.1	35.2	70.4	103	37.1	2.26667	1.70127	1.98397	0.750561
A_55_P2360266	4833411C07Rik	RIKEN cDNA 4833411C07 gene	gb|BC052524|tc|TC1628553	Mus musculus RIKEN cDNA 4833411C07 gene, mRNA (cDNA clone IMAGE:3465514). [BC052524]		AAGAATGACAGGCAAAGGAGCCACTGAGTAGATGTGAACGCCTTTAATTCCTGTACTGAG	52.761	81.4	59	59.6	84.1	131	135	108	128	106	109	86.1	111	155	139	83.6	2.16949	1.77852	1.97401	0.819788
A_55_P2092869	Anxa9	annexin A9	ref|NM_001085383|ref|NM_023628|ens|ENSMUST00000107183|ens|ENSMUST00000015846	Mus musculus annexin A9 (Anxa9), transcript variant 1, mRNA [NM_001085383]	GO:0001786(phosphatidylserine binding)|GO:0005509(calcium ion binding)|GO:0005543(phospholipid binding)|GO:0005544(calcium-dependent phospholipid binding)|GO:0005829(cytosol)|GO:0007165(signal transduction)|GO:0007268(synaptic transmission)|GO:0009986(cell surface)|GO:0015464(acetylcholine receptor activity)|GO:0016337(cell-cell adhesion)	GGAACGCAAATCTCAGGAAAGAAGTTTTATTTCCAAACCTCTAGGAAGGCATTAAAAATA	59.5896	83.6	42.6	41.5	51.5	91.5	65.7	53.4	76.6	88.6	55.1	106	94.5	102	74.6	44.6	1.79812	2.13494	1.96653	1.18732
A_51_P302139	Mastl	microtubule associated serine/threonine kinase-like	ref|NM_025979|gb|AK012597|gb|BC103779|gb|AK030140	Mus musculus microtubule associated serine/threonine kinase-like (Mastl), mRNA [NM_025979]	GO:0000086(G2/M transition of mitotic cell cycle)|GO:0000166(nucleotide binding)|GO:0004672(protein kinase activity)|GO:0004674(protein serine/threonine kinase activity)|GO:0005524(ATP binding)|GO:0005634(nucleus)|GO:0005737(cytoplasm)|GO:0005813(centrosome)|GO:0005856(cytoskeleton)|GO:0006468(protein phosphorylation)|GO:0007049(cell cycle)|GO:0007067(mitosis)|GO:0016301(kinase activity)|GO:00163…	AACAGATACATCCTATTTTGAAGCCAGAAATAATGCTCAACATCTGACCATATCTGGGTT	91.106	121	25	33.5	1.89	33.6	27.1	22.1	58	53.1	38.8	29.8	151	46.5	49.8	21	2.32	1.58507	1.95254	0.683222
A_30_P01023147			chr13:54399275-54445825_R	lincRNA:chr13:54399275-54445825 reverse strand		TGTTGATTGAACTATTTTCCAGCGTCTTGTTTCCCAACATTTCCCCTGGATTCTTGTTTG	62.6607	267	28.8	31.9	24.8	59.8	103	133	59.7	58.1	65	55.3	32.1	57.9	116	107	2.07292	1.82132	1.94712	0.878625
A_55_P2148554			ens|ENSMUST00000141133	predicted gene 13496 [Source:MGI Symbol;Acc:MGI:3651033] [ENSMUST00000141133]		AGTGTTAATACCAAAGATGGAAGGAGAAAGACCACCGACCCAATCATTATGGTCAAATTA	29.0827	58.2	30.6	35.7	41.1	44.1	52.1	23.5	71.7	55.2	39.2	42.2	31.8	64.7	84	44.4	2.34314	1.54622	1.94468	0.659892
A_55_P1962655	Olfr652	olfactory receptor 652	ref|NM_147048|ens|ENSMUST00000104877|ens|ENSMUST00000098175|gb|BC137763	Mus musculus olfactory receptor 652 (Olfr652), mRNA [NM_147048]	GO:0004871(signal transducer activity)|GO:0004930(G-protein coupled receptor activity)|GO:0004984(olfactory receptor activity)|GO:0005886(plasma membrane)|GO:0007165(signal transduction)|GO:0007186(G-protein coupled receptor signaling pathway)|GO:0007608(sensory perception of smell)|GO:0016020(membrane)|GO:0016021(integral to membrane)|GO:0050896(response to stimulus)|GO:0050911(detection of chem…	AAGACCAAGCAGATTCGGGACAAAATCAACCTCCTATTCTTCCCCAAAGACAACCATTGA	68.1701	19	40.1	27.7	39.7	63.3	70.7	57.9	77.5	54	36.8	16.8	35.4	64.5	95	42	1.93267	1.94946	1.94106	1.00869
A_55_P2169659	Vwf	Von Willebrand factor homolog	ens|ENSMUST00000112253|gb|AK083237|gb|AK170399|gb|AK164450	Von Willebrand factor homolog [Source:MGI Symbol;Acc:MGI:98941] [ENSMUST00000112253]	GO:0001889(liver development)|GO:0001890(placenta development)|GO:0001948(glycoprotein binding)|GO:0002020(protease binding)|GO:0005178(integrin binding)|GO:0005515(protein binding)|GO:0005518(collagen binding)|GO:0005576(extracellular region)|GO:0005578(proteinaceous extracellular matrix)|GO:0005783(endoplasmic reticulum)|GO:0007155(cell adhesion)|GO:0007596(blood coagulation)|GO:0007599(hemosta…	TAGTTAAACAGAACAACAGTGAAGGGCGGAGGGTGGAGATTTATTCAACACTGGGAAGAG	91.8249	110	41.1	55.9	24	49.5	66.1	36.3	85.9	100	30.7	49.6	76.6	66	93.3	18.3	2.09002	1.78891	1.93947	0.855927
A_30_P01018792			chr3:40966969-40976585_R	lincRNA:chr3:40966969-40976585 reverse strand		GGATGAGAACATAGAACCCCAATTGCCTGAATGACGACACAGAGGCCCCAACTGTCTGGA	47.8602	31.3	47.8	42.4	41.7	72.2	104	99.6	112	64.7	72.6	34.7	47.7	74.4	183	91	2.3431	1.52594	1.93452	0.651251
A_30_P01026511			chr10:61498439-61498933_R	lincRNA:chr10:61498439-61498933 reverse strand		AATTAGTAGGTGCCCACCAGGATGTTCAACCCACAGCCAATAATGTGTGCAAGAGAAGTT	35.3936	29.9	23.2	60	23.1	51.3	59.7	72.6	52.2	96.8	43.4	51.7	39.2	49	49.1	39.2	2.25	1.61333	1.93167	0.717037
A_55_P2152991	Ccdc64	coiled-coil domain containing 64	ref|NM_001080808|gb|BC126948|ens|ENSMUST00000148276|nap|NAP028259-1	Mus musculus coiled-coil domain containing 64 (Ccdc64), mRNA [NM_001080808]	GO:0005515(protein binding)|GO:0005622(intracellular)|GO:0005623(cell)|GO:0005737(cytoplasm)|GO:0005813(centrosome)|GO:0005856(cytoskeleton)|GO:0006810(transport)|GO:0007399(nervous system development)|GO:0017137(Rab GTPase binding)|GO:0031175(neuron projection development)|GO:0034452(dynactin binding)|GO:0055107(Golgi to secretory granule transport)	ACTCAGAGTGACCTCTGAGGACAAGGAGCCAAAGGAGCAGCTTCAGAAGGCCATCAGGGA	71.9676	86.6	44.3	44.6	70.4	66.5	91.1	67.1	74.3	96.4	104	75.4	104	71.8	46.3	62.8	1.6772	2.16143	1.91932	1.28872
A_55_P2058330	Insm2	insulinoma-associated 2	ref|NM_020287|ens|ENSMUST00000051857	Mus musculus insulinoma-associated 2 (Insm2), mRNA [NM_020287]	GO:0003676(nucleic acid binding)|GO:0003677(DNA binding)|GO:0003714(transcription corepressor activity)|GO:0005634(nucleus)|GO:0005737(cytoplasm)|GO:0006351(transcription, DNA-dependent)|GO:0006355(regulation of transcription, DNA-dependent)|GO:0045892(negative regulation of transcription, DNA-dependent)|GO:0046872(metal ion binding)	GGGACACTGGCAGAGTGCTCTTTGACAAATGGATTTGTAAGAATGGTTCTGCCAAATAAA	112.51	139	61.4	72.9	50.1	68	41.7	44	130	125	40.8	75.5	20.1	73.5	56.9	48.7	2.11726	1.71468	1.91597	0.809855
A_30_P01026071			chr4:97106832-97107437_F	lincRNA:chr4:97106832-97107437 forward strand		ATGGAAACAATAGTAATCATTGCTGCTAATGCCCTGCTATGGTTGGTCTGTCACTCCCAC	72.7104	68.5	52.4	70.4	63.1	96.4	160	172	107	126	66.4	66.3	52.1	73.3	154	113	2.04198	1.78977	1.91588	0.876487
A_30_P01029321			chrX:150159252-150181275_F	lincRNA:chrX:150159252-150181275 forward strand		AGGCCAGAAGAAAATGAGACAGACTATAGTGACAGAAGAAGAAAGGACTTCACCTTCTTT	107.681	135	41.3	61	38.3	74.4	96.8	80.9	94.5	93.5	63.7	57.4	38.8	76.5	74.3	34.7	2.28814	1.53279	1.91046	0.669885
A_55_P2158121	Sostdc1	sclerostin domain containing 1	ref|NM_025312|ens|ENSMUST00000041407|gb|AK007893|gb|AK002396	Mus musculus sclerostin domain containing 1 (Sostdc1), mRNA [NM_025312]	GO:0005515(protein binding)|GO:0005576(extracellular region)|GO:0005615(extracellular space)|GO:0007389(pattern specification process)|GO:0010454(negative regulation of cell fate commitment)|GO:0016055(Wnt receptor signaling pathway)|GO:0030514(negative regulation of BMP signaling pathway)|GO:0031069(hair follicle morphogenesis)|GO:0042475(odontogenesis of dentin-containing tooth)|GO:0060648(mamm…	TTTTTCCAGTCTCAGTGTGAAATTATCCCCCTGAATGTTGACCTCTCTGGGAGTGGAATG	332.024	451	140	142	72.5	116	98.5	137	249	288	134	161	67.9	74.4	228	189	1.77857	2.02817	1.90337	1.14034
A_55_P2084703	Acaca	acetyl-Coenzyme A carboxylase alpha	ref|NM_133360|ens|ENSMUST00000020843|ens|ENSMUST00000103201|ref|XM_003086894	Mus musculus acetyl-Coenzyme A carboxylase alpha (Acaca), mRNA [NM_133360]	GO:0000166(nucleotide binding)|GO:0001894(tissue homeostasis)|GO:0003824(catalytic activity)|GO:0003989(acetyl-CoA carboxylase activity)|GO:0004075(biotin carboxylase activity)|GO:0005515(protein binding)|GO:0005524(ATP binding)|GO:0005737(cytoplasm)|GO:0005739(mitochondrion)|GO:0005829(cytosol)|GO:0006084(acetyl-CoA metabolic process)|GO:0006629(lipid metabolic process)|GO:0006631(fatty acid met…	TGTGATAGAGGAGAACATCAAATACATCAGCAGGGACTATGTCCTGAAGCAGATCCGCAG	158.756	207	42.4	54	123	70.7	72	67.6	78.1	106	71.3	56.1	49.5	76.6	38.2	55.1	1.84198	1.96296	1.90247	1.06568
A_55_P1978258						GAGGAAGAGGAAGAAAAGGAGAAGAGGAGGAAGGAAGAGGAGGAGGAAGAGAAGGAGGAA	541.487	619	260	346	343	425	580	466	530	611	534	372	310	475	615	399	2.03846	1.7659	1.90218	0.866289
A_30_P01025984			chr17:15226181-15250333_F	lincRNA:chr17:15226181-15250333 forward strand		CCAACTAAAGGATGGTGGGCCACAGAGAGCTGGTGCCTGAAACTTTCCCTCGAGTCCTCA	52.5964	43.9	42	69.7	57.8	75.7	79.1	91	77.6	136	75.1	68	64.6	69.8	147	81.6	1.84762	1.95122	1.89942	1.05607
A_30_P01019262			chr8:37582187-37621987_F	lincRNA:chr8:37582187-37621987 forward strand		GACAAGGTGGTGTGGCCTGTTTTGAGTTTCTTACATGAAAATGGAGTGGGTTAGCTATTG	38.3224	65.4	35.6	56.3	36.7	57.5	60	72.3	79.8	86.8	40.5	67.2	31.3	75.9	71.7	36.2	2.24157	1.54174	1.89166	0.687794
A_55_P2171116	Lgals3	lectin, galactose binding, soluble 3	ref|NM_001145953|ref|NM_010705|ens|ENSMUST00000150290|ens|ENSMUST00000142734	Mus musculus lectin, galactose binding, soluble 3 (Lgals3), transcript variant 1, mRNA [NM_001145953]	GO:0001501(skeletal system development)|GO:0005515(protein binding)|GO:0005576(extracellular region)|GO:0005578(proteinaceous extracellular matrix)|GO:0005634(nucleus)|GO:0005681(spliceosomal complex)|GO:0005737(cytoplasm)|GO:0005743(mitochondrial inner membrane)|GO:0006397(mRNA processing)|GO:0008380(RNA splicing)|GO:0019863(IgE binding)|GO:0030154(cell differentiation)|GO:0030198(extracellular …	TTTCTCTCTCCTTATCCTTCTTGTAAGACATCCATTTAATAAAGTCTCATGCTGAGAGAT	283.758	361	123	197	170	221	162	197	239	360	186	244	11700	13300	279	244	1.94309	1.82741	1.88525	0.940467
A_55_P2049717	Agrp	agouti related protein	ref|NM_001271806|ref|NM_007427|ens|ENSMUST00000005849|gb|AK138796	Mus musculus agouti related protein (Agrp), transcript variant 2, mRNA [NM_001271806]	GO:0005102(receptor binding)|GO:0005184(neuropeptide hormone activity)|GO:0005576(extracellular region)|GO:0005615(extracellular space)|GO:0005794(Golgi apparatus)|GO:0005796(Golgi lumen)|GO:0007218(neuropeptide signaling pathway)|GO:0008343(adult feeding behavior)|GO:0009755(hormone-mediated signaling pathway)|GO:0042755(eating behavior)|GO:0043025(neuronal cell body)|GO:0060259(regulation of fe…	CTAGCCAATGGATGTTGTTTGGGCAAAGGCAGGGGATGAGAATAAAGGATGGGACGGTTT	51.4042	62.8	48.2	61.8	45.7	69.2	64.9	60.3	109	92.7	51.6	60	39.3	89.8	71.2	54.3	2.26141	1.5	1.88071	0.663303
A_51_P108020	Zmynd15	zinc finger, MYND-type containing 15	ref|NM_001029929|ens|ENSMUST00000136029|ens|ENSMUST00000039093|gb|AK128979	Mus musculus zinc finger, MYND-type containing 15 (Zmynd15), mRNA [NM_001029929]	GO:0005634(nucleus)|GO:0005737(cytoplasm)|GO:0006351(transcription, DNA-dependent)|GO:0006355(regulation of transcription, DNA-dependent)|GO:0007283(spermatogenesis)|GO:0007286(spermatid development)|GO:0030154(cell differentiation)|GO:0042826(histone deacetylase binding)|GO:0045892(negative regulation of transcription, DNA-dependent)|GO:0046872(metal ion binding)	CCCTAAAGGAAAACATTCCAAGGCCCAGGGAAGACTGATTGTCGGAACACAAAAGGTTAA	148.287	224	41.2	72.3	52.8	83.3	99.1	66	91.7	111	53.6	81.6	155	131	84.7	52	2.22573	1.53527	1.8805	0.689783
A_30_P01031798			chr7:31709550-31723025_F	lincRNA:chr7:31709550-31723025 forward strand		TCAAGACACCAGAGGCCAACAGGAGTACTTAGATTGAGGCAAGGTACAAAGTGTAGCAAA	41.1675	58.7	36.4	47.9	35.4	41	52.8	29.6	77.8	77.5	44.4	49.5	34.6	65.4	55.2	50.9	2.13736	1.61795	1.87766	0.756986
A_55_P2070316	Ankrd36	ankyrin repeat domain 36	ref|NM_023816|ens|ENSMUST00000146773|ens|ENSMUST00000118112|ens|ENSMUST00000109856	Mus musculus ankyrin repeat domain 36 (Ankrd36), mRNA [NM_023816]	GO:0003674(molecular_function)|GO:0005575(cellular_component)|GO:0008150(biological_process)	ATGTTCACCCCGCTTCAAGGAAGACAACAAAAGGATGGAGGAAAACACAGATGCAGTTGA	35.3447	71.9	26.6	35.1	28.7	71.4	96.4	45.9	58.1	55.1	38.3	15.8	23.9	54.5	59.9	45.3	2.18421	1.5698	1.87701	0.718704
A_55_P2037428	Mogat1	monoacylglycerol O-acyltransferase 1	ref|NM_026713|ens|ENSMUST00000113524|ens|ENSMUST00000012331|ens|ENSMUST00000125458	Mus musculus monoacylglycerol O-acyltransferase 1 (Mogat1), mRNA [NM_026713]	GO:0003846(2-acylglycerol O-acyltransferase activity)|GO:0004144(diacylglycerol O-acyltransferase activity)|GO:0005783(endoplasmic reticulum)|GO:0006071(glycerol metabolic process)|GO:0006629(lipid metabolic process)|GO:0006651(diacylglycerol biosynthetic process)|GO:0016020(membrane)|GO:0016021(integral to membrane)|GO:0016740(transferase activity)|GO:0016746(transferase activity, transferring a…	CCTTCCTCCAAGGCATAAGAAAGGAAGGCAAGAAAGCATCGTTGAGAAAATAAATAAATA	43.077	39.5	31.5	38.1	40.1	64.6	45.6	44.4	66.8	61.3	43.6	19.5	38.3	70.8	65.4	31.7	2.12063	1.60892	1.86478	0.758699
A_51_P114616	Batf	basic leucine zipper transcription factor, ATF-like	ref|NM_016767|ens|ENSMUST00000040536|gb|AF017021|gb|BC132410	Mus musculus basic leucine zipper transcription factor, ATF-like (Batf), mRNA [NM_016767]	GO:0001816(cytokine production)|GO:0002320(lymphoid progenitor cell differentiation)|GO:0003677(DNA binding)|GO:0003700(sequence-specific DNA binding transcription factor activity)|GO:0005515(protein binding)|GO:0005622(intracellular)|GO:0005634(nucleus)|GO:0005737(cytoplasm)|GO:0006351(transcription, DNA-dependent)|GO:0006355(regulation of transcription, DNA-dependent)|GO:0006974(response to DNA…	TATAGTCAATGTACTGGACTCTCCCAGGGAAGTTCGAGCCAATGTACTGGACCCAAAAAT	66.8639	89.4	34.8	63.8	53.5	68.1	61.4	42.9	66.8	115	44.8	120	217	195	61	78	1.91954	1.80251	1.86102	0.939031
A_55_P2097279	Pirb	paired Ig-like receptor B	ref|NM_011095|ens|ENSMUST00000136238|ens|ENSMUST00000078451|ens|ENSMUST00000155131	Mus musculus paired Ig-like receptor B (Pirb), mRNA [NM_011095]	GO:0001782(B cell homeostasis)|GO:0005886(plasma membrane)|GO:0016020(membrane)|GO:0016021(integral to membrane)|GO:0019221(cytokine-mediated signaling pathway)|GO:0019724(B cell mediated immunity)|GO:0043011(myeloid dendritic cell differentiation)	GAAACGTGACTGCACTTTAAGTAACATCAGAGTTTGGAAATAAAGCTAGAGATTTCTCAA	21.2534	38.1	31.3	52.2	223	108	113	124	56.2	99.9	72	78.8	781	820	115	100	1.79553	1.91379	1.85466	1.06587
A_30_P01022453			chr13:23517278-23523756_F	lincRNA:chr13:23517278-23523756 forward strand		CACTCCGTAAATCCAAAAGGAAAAGGACAAGTTTGCATTCTCCCTTTTTGCAAATTTTTT	32.8142	54.5	24.8	31.1	35.8	41.7	61.3	30.9	51.3	50.4	129	30.8	22.7	44	62.7	34	2.06855	1.62058	1.84456	0.783438
A_52_P490370	Sbf2	SET binding factor 2	ref|NM_177324|ens|ENSMUST00000033058|gb|BC015069|gb|AF073879	Mus musculus SET binding factor 2 (Sbf2), mRNA [NM_177324]	GO:0005774(vacuolar membrane)|GO:0016020(membrane)|GO:0017112(Rab guanyl-nucleotide exchange factor activity)|GO:0019208(phosphatase regulator activity)|GO:0019902(phosphatase binding)|GO:0035091(phosphatidylinositol binding)|GO:0042803(protein homodimerization activity)|GO:0050790(regulation of catalytic activity)|GO:0051262(protein tetramerization)	CCTAATGTAAATGTCTCCAGCCTAAAGAAGTGGGATTACTACACAGAAGAGACCCTGTCT	122.662	114	42.6	37.3	36.2	50	64.2	58.4	64.7	80.6	43.6	64.8	37.1	45.6	44.6	56.6	1.51878	2.16086	1.83982	1.42276
A_30_P01023825			chr4:105035450-105059250_F	lincRNA:chr4:105035450-105059250 forward strand		AGGAGCTTCGAATTTTTGCTCATGCTGACTTTACTCTCCTTCTTCGACATAGCGAATCCC	48.8909	54.2	41.8	46	58.9	76.6	119	86.8	85.6	73.2	59.5	53	74.5	48.7	90.2	82.3	2.04785	1.5913	1.81958	0.777062
A_30_P01019581			chr7:132218864-132329172_F	lincRNA:chr7:132218864-132329172 forward strand		GAGCTGATCGGGAGAATACAGCGTGAGGTTCAGAGAAAATCTGAGGAGCCCACCAACCAG	36.9995	43.5	51.4	38.2	71.6	84.9	137	78.4	81.5	78	49.3	63.1	232	80.8	128	101	1.5856	2.04188	1.81374	1.28777
A_55_P2158498	Btk	Bruton agammaglobulinemia tyrosine kinase	ref|NM_013482|ens|ENSMUST00000033617|gb|BC053392|gb|L29788	Mus musculus Bruton agammaglobulinemia tyrosine kinase (Btk), mRNA [NM_013482]	GO:0000166(nucleotide binding)|GO:0002553(histamine secretion by mast cell)|GO:0004672(protein kinase activity)|GO:0004713(protein tyrosine kinase activity)|GO:0004715(non-membrane spanning protein tyrosine kinase activity)|GO:0005515(protein binding)|GO:0005524(ATP binding)|GO:0005547(phosphatidylinositol-3,4,5-trisphosphate binding)|GO:0005622(intracellular)|GO:0005634(nucleus)|GO:0005737(cytop…	AGACTCCTAACAGACTGAATTGGGGATGGGAACACTTTGGGGGAGGGAAAACTGTAAATA	110.346	143	89.2	115	82.3	116	118	63.9	182	181	113	171	287	335	115	70	2.04036	1.57391	1.80714	0.77139
A_55_P1962334	Trim71	tripartite motif-containing 71	ref|NM_001042503|gb|DQ005956|gb|AK011901|tc|TC1587568	Mus musculus tripartite motif-containing 71 (Trim71), mRNA [NM_001042503]	GO:0000082(G1/S transition of mitotic cell cycle)|GO:0000932(cytoplasmic mRNA processing body)|GO:0001843(neural tube closure)|GO:0003723(RNA binding)|GO:0004842(ubiquitin-protein ligase activity)|GO:0005515(protein binding)|GO:0005622(intracellular)|GO:0005737(cytoplasm)|GO:0007275(multicellular organismal development)|GO:0008270(zinc ion binding)|GO:0008543(fibroblast growth factor receptor sig…	AAAGGATTTACAAACCAAACCACCCAACAGGAAGTGTAGGACACAGTATATGTCTTTTTT	19.8517	21.5	40.1	41.1	56	75.3	65.7	67.9	80.4	65.7	67.4	80.7	17	66.7	94.5	69.3	2.00499	1.59854	1.80176	0.797282
A_52_P462257			ens|ENSMUST00000055994|ens|ENSMUST00000134605|ens|ENSMUST00000140081|ref|XR_106290	RIKEN cDNA D830014E11 gene [Source:MGI Symbol;Acc:MGI:2444658] [ENSMUST00000055994]		ACTATTCAGCTTAAGTGAAGTCATCACTGAAGGAAAGAGCAGAAGGAATTCGGAATAGTT	31.7496	68	28	31.8	46.2	44	33.4	17.2	50.8	56.6	30.5	38.2	20.1	40.5	27.9	22.2	1.81429	1.77987	1.79708	0.981033
A_30_P01030533			chr2:80338640-80339980_R	lincRNA:chr2:80338640-80339980 reverse strand		GTGGTCCCCAACTGATAAGGATTTCTTAAGGGGAGTTGTAAAATAGTATAGTTTCTATTA	40.6069	52.1	28.5	28.8	234	74.1	63.7	76.8	52	50.6	42	49.4	51.3	56.9	49.9	60.6	1.82456	1.75694	1.79075	0.962941
A_30_P01021422			chr5:53931541-53945241_R	lincRNA:chr5:53931541-53945241 reverse strand		TACCCAAGAAAAAGGGGGTGGGAGTTGGGGGTTTGCCAAATCAGGAAATGTGAATTAACA	65.6958	77.5	41.2	48.7	37.2	71.1	42.8	61.7	81.3	78.3	58.8	48.1	53.1	68	82.7	31.4	1.9733	1.6078	1.79055	0.814778
A_55_P2165401			nap|NAP023752-001			AAGTTAGGCTACTACTGGTGGCTTCTGTTTCCTGTGACCTTCACATCCAAGACCTTGTGA	316.44	892	168	299	146	235	295	403	284	561	168	206	160	192	314	161	1.69048	1.87625	1.78337	1.1099
A_52_P227	4930520O04Rik	RIKEN cDNA 4930520O04 gene	ref|NR_040383|ref|NR_040384|ens|ENSMUST00000124664|gb|AK015855	Mus musculus RIKEN cDNA 4930520O04 gene (4930520O04Rik), transcript variant 1, long non-coding RNA [NR_040383]		ATGACAAAACACATCAAACAGACAAACAAAAGGGCTAAGGTTGGCTAAGGGAGATCGAGT	105.744	106	26.3	56.2	37.3	62.2	85.4	91.1	53.2	86.4	104	62.8	63.2	80.3	65.2	38.6	2.02281	1.53737	1.78009	0.760014
A_55_P2089565	Tbx22	T-box 22	ref|NM_181319|ref|NM_145224|ens|ENSMUST00000118986|ens|ENSMUST00000168174	Mus musculus T-box 22 (Tbx22), transcript variant 2, mRNA [NM_181319]	GO:0000122(negative regulation of transcription from RNA polymerase II promoter)|GO:0003677(DNA binding)|GO:0003700(sequence-specific DNA binding transcription factor activity)|GO:0005634(nucleus)|GO:0006351(transcription, DNA-dependent)|GO:0006355(regulation of transcription, DNA-dependent)|GO:0045892(negative regulation of transcription, DNA-dependent)	CTCTGTGTTTTATCAATTTCCTAAGACCAAAAGGAAAGAGAAAGAGAGAGAGAGAGAGAG	125.165	162	57.3	84.1	82.4	122	111	112	89.5	168	56.9	102	143	118	93.5	95.2	1.56195	1.99762	1.77979	1.27892
A_51_P108020	Zmynd15	zinc finger, MYND-type containing 15	ref|NM_001029929|ens|ENSMUST00000136029|ens|ENSMUST00000039093|gb|AK128979	Mus musculus zinc finger, MYND-type containing 15 (Zmynd15), mRNA [NM_001029929]	GO:0005634(nucleus)|GO:0005737(cytoplasm)|GO:0006351(transcription, DNA-dependent)|GO:0006355(regulation of transcription, DNA-dependent)|GO:0007283(spermatogenesis)|GO:0007286(spermatid development)|GO:0030154(cell differentiation)|GO:0042826(histone deacetylase binding)|GO:0045892(negative regulation of transcription, DNA-dependent)|GO:0046872(metal ion binding)	CCCTAAAGGAAAACATTCCAAGGCCCAGGGAAGACTGATTGTCGGAACACAAAAGGTTAA	161.493	204	37.5	59.4	47.8	52.4	70.6	45.4	72.7	95.7	69.4	46.9	125	308	142	53.1	1.93867	1.61111	1.77489	0.831041
A_55_P1958227			gb|AK135304|riken|6720464L12	Mus musculus 12 days embryo male wolffian duct includes surrounding region cDNA, RIKEN full-length enriched library, clone:6720464L12 product:unclassifiable, full insert sequence. [AK135304]		TGAAGGGGAGGAGAGGATGACTAGCACTGATGGACTCCAACCTTCCTTTTTCTTTTTATT	78.3666	57.3	50.5	48.7	36.6	73.1	73	67.7	94.9	80.3	54	48.3	37.2	90.8	89.4	77.2	1.87921	1.64887	1.76404	0.877429
A_55_P2065059	Wnt2	wingless-related MMTV integration site 2	ref|NM_023653|ens|ENSMUST00000010941|gb|AK045120|tc|TC1586019	Mus musculus wingless-related MMTV integration site 2 (Wnt2), mRNA [NM_023653]	GO:0001938(positive regulation of endothelial cell proliferation)|GO:0002053(positive regulation of mesenchymal cell proliferation)|GO:0005102(receptor binding)|GO:0005109(frizzled binding)|GO:0005125(cytokine activity)|GO:0005576(extracellular region)|GO:0005578(proteinaceous extracellular matrix)|GO:0005615(extracellular space)|GO:0005737(cytoplasm)|GO:0005886(plasma membrane)|GO:0007267(cell-c…	GAGAATCTGAAAGGGGAATGGATGATCTAGCAATATTATTTAACTACTGGGTAAATATGG	60.0645	47.5	32.5	43.6	44.5	62	47.7	98.8	55	79.5	37.7	41	36.4	25.1	73.5	41.4	1.69231	1.82339	1.75785	1.07746
A_55_P2065572						GGAGATCAGAGACCAGAGTGGGAAATTCTAAGATCTAATATAAAGCCGTTAAGATATAAT	30.5191	36.1	28.9	44.5	22.2	47.6	42.5	45.2	54.2	72.4	34.1	36.8	30.4	57.6	35.7	34.3	1.87543	1.62697	1.7512	0.867515
A_30_P01027294			chr3:100363012-100369971_F	lincRNA:chr3:100363012-100369971 forward strand		TGTGCTGTATGAGGAAGGCTCACTTTCTTTTTCTCTGAGAACCAAAACCTCATCTTTTTT	51.3474	53.7	34.9	37.9	56.9	53.6	69.7	92.1	67.5	59.4	51.4	48.9	40	48.3	49.5	54.6	1.9341	1.56728	1.75069	0.810343
A_30_P01032409			chr4:136856064-136877219_F	lincRNA:chr4:136856064-136877219 forward strand		AAATTAACTATTACTGGAAGGGCAAGGAGGGGCCATACTAATGGGCCTTGTCTCACATGA	68.1907	75	41	60.2	33.7	47.2	64.9	65.2	78.7	93.4	70.7	40.1	43.3	75.9	80.6	62.8	1.91951	1.5515	1.7355	0.808276
A_55_P2047335	Capn5	calpain 5	ref|NM_007602|ens|ENSMUST00000107112|ens|ENSMUST00000040971|gb|BC014767	Mus musculus calpain 5 (Capn5), mRNA [NM_007602]	GO:0004198(calcium-dependent cysteine-type endopeptidase activity)|GO:0005622(intracellular)|GO:0006508(proteolysis)|GO:0008233(peptidase activity)|GO:0008234(cysteine-type peptidase activity)|GO:0009986(cell surface)|GO:0016787(hydrolase activity)	GCCTCAGTGTTTGGAGGGCCCCAAAGAATTCCCGTCTTGTGGGGGAGTTTTCTTGCCTAA	234.133	349	135	137	188	185	281	302	211	261	183	256	164	218	154	227	1.56296	1.90511	1.73404	1.21891
A_55_P2114088	Zfp385c	zinc finger protein 385C	ref|NM_177790|ens|ENSMUST00000103119|gb|AK044299|gb|BB251821	Mus musculus zinc finger protein 385C (Zfp385c), mRNA [NM_177790]	GO:0003676(nucleic acid binding)|GO:0005634(nucleus)|GO:0008150(biological_process)|GO:0008270(zinc ion binding)|GO:0046872(metal ion binding)	GGACGGGAAACTTTTTGATAATAGCAGTTGTGGTTTTATTGTGTCCAACACATCAATAAA	79.6401	85.9	49.1	57.5	36.7	67.4	48.3	60	94	88.2	29.2	53.8	69	74.8	41	55.2	1.91446	1.53391	1.72419	0.801225
A_30_P01021501			chr2:150072436-150074859_F	lincRNA:chr2:150072436-150074859 forward strand		AGGTACATCCTTTCACATTCCCTTGTAAGTATTCTTAACCCAGGTATGACTAGGCTTCTG	134.93	197	61.8	94.7	96.1	139	110	142	105	164	87.3	130	127	142	107	107	1.69903	1.73178	1.71541	1.01928
A_55_P2019684	Bspry	B-box and SPRY domain containing	ref|NM_138653|ens|ENSMUST00000107449|ens|ENSMUST00000030088|gb|BC139079	Mus musculus B-box and SPRY domain containing (Bspry), mRNA [NM_138653]	GO:0005499(vitamin D binding)|GO:0005622(intracellular)|GO:0005634(nucleus)|GO:0005737(cytoplasm)|GO:0005925(focal adhesion)|GO:0006810(transport)|GO:0006811(ion transport)|GO:0006816(calcium ion transport)|GO:0008150(biological_process)|GO:0008270(zinc ion binding)|GO:0016020(membrane)|GO:0031252(cell leading edge)|GO:0046872(metal ion binding)|GO:0048471(perinuclear region of cytoplasm)	ATACGAAGGACAACCTGCCAGGATACTGTTGGCCAGAACGTCGTCGTGGGAGTGTGGTAG	55.4098	72.7	49.8	38.5	55.2	92.1	59.1	45	88	61	47.1	53.7	43.6	80.6	70.1	38.2	1.76707	1.58442	1.67574	0.896635
A_51_P282616	Maats1	MYCBP-associated, testis expressed 1	ref|NM_001081025|gb|AK077038|ens|ENSMUST00000023501|tc|TC1603418	Mus musculus MYCBP-associated, testis expressed 1 (Maats1), mRNA [NM_001081025]	GO:0003674(molecular_function)|GO:0005575(cellular_component)|GO:0005737(cytoplasm)|GO:0005739(mitochondrion)|GO:0008150(biological_process)	GGCTCTATTGAAACTTAACTCTTGCAATCTAAAAAATAAGACTATTGGTTATTTGGGGGG	68.9445	106	50.1	48.1	68.1	73	59.5	62.7	77.2	85.9	46.6	60.1	72.7	69.7	92.4	55.7	1.54092	1.78586	1.66339	1.15896
A_55_P2084980	Dcaf12l2	DDB1 and CUL4 associated factor 12-like 2	ref|NM_175539|ens|ENSMUST00000056834|gb|AK037333|gb|AK076436	Mus musculus DDB1 and CUL4 associated factor 12-like 2 (Dcaf12l2), mRNA [NM_175539]	GO:0003674(molecular_function)|GO:0005575(cellular_component)|GO:0008150(biological_process)	GTGTGTGTGTGAGTGATTTATTTTCAAAGTGGAGTTGACCCAACTTTCTAGTGCTCAATC	699.976	1680	364	687	275	611	382	621	628	1100	443	809	544	834	381	726	1.72527	1.60116	1.66322	0.928063
A_30_P01024570			chrX:102567595-102589870_F	lincRNA:chrX:102567595-102589870 forward strand		ACTCCAGGGAAAATACAGATTATAACTGACACCCTTTGTGAATGGTTTCTTCAGATACAT	72.2211	85.7	59.1	76.3	68.2	88.7	96.5	103	91.5	135	61.3	68.8	79.7	99.3	112	77.5	1.54822	1.76933	1.65878	1.14281
A_55_P2078633	C4b	complement component 4B (Chido blood group)	ref|NM_009780|ref|NM_011413|ens|ENSMUST00000069507|ens|ENSMUST00000173669	Mus musculus complement component 4B (Chido blood group) (C4b), mRNA [NM_009780]	GO:0005576(extracellular region)|GO:0005615(extracellular space)|GO:0006956(complement activation)|GO:0016064(immunoglobulin mediated immune response)	CCTCACTGGATTAGAGGCTCTGCTCTACAGGGTAAATAAAAGAAAAGCTTTTTGACAGCC	1049.16	1230	1020	1210	1560	1730	1530	1780	1540	2180	1280	1470	15600	15400	5390	4390	1.5098	1.80165	1.65573	1.1933
A_51_P484158	Steap1	six transmembrane epithelial antigen of the prostate 1	ref|NM_027399|ens|ENSMUST00000015796|gb|AK144312|gb|AK010437	Mus musculus six transmembrane epithelial antigen of the prostate 1 (Steap1), mRNA [NM_027399]	GO:0005768(endosome)|GO:0005886(plasma membrane)|GO:0006810(transport)|GO:0006811(ion transport)|GO:0008823(cupric reductase activity)|GO:0015677(copper ion import)|GO:0016020(membrane)|GO:0016021(integral to membrane)|GO:0016491(oxidoreductase activity)|GO:0016723(oxidoreductase activity, oxidizing metal ions, NAD or NADP as acceptor)|GO:0046872(metal ion binding)|GO:0052851(ferric-chelate reduc…	CTCCAGGTTGTAGAACTACTGTTTGCACATATTTGCTTGTTATTGATGTCCTATCATAAG	120.271	184	101	155	72.7	75.9	31.1	36.7	156	272	75.6	114	79.2	81.5	168	166	1.54455	1.75484	1.6497	1.13615
A_30_P01021086			chr4:126710640-126721240_R	lincRNA:chr4:126710640-126721240 reverse strand		TCTAAAACCTGTCCAAGATCATTAACACAAAAGGCAGCGGGAAATGCAGGACTGTGGATC	42.1064	44.1	38.5	32.8	37.5	52.6	49.6	48.7	58.2	58.6	36.9	18.8	43.1	46	65.6	24.9	1.51169	1.78659	1.64914	1.18185
A_30_P01031037			chr1:92177032-92180487_F	lincRNA:chr1:92177032-92180487 forward strand		TATGTGAGTTGGAAACGGGTTTCTACAGAACAGGAAATAGGTACCACTGCGGGTTTACAC	51.5467	84.3	40.5	42.5	46.4	88.6	74.1	78.9	65.8	70	84.8	85.7	173	77	87.9	64.6	1.62469	1.64706	1.63588	1.01377
A_30_P01024622			chr9:34192364-34192810_R	lincRNA:chr9:34192364-34192810 reverse strand		CTTCAAAGATGTCTGGCTTCTTCCTCATCACTTGAACTGAGACAAAGGACTCGTCACTGA	89.1654	195	79.1	113	90.3	119	216	184	132	181	162	149	118	120	229	179	1.66877	1.60177	1.63527	0.959848
A_55_P2106180	Dnah2	dynein, axonemal, heavy chain 2	ref|NM_001081330|ens|ENSMUST00000108659|ens|ENSMUST00000035539|gb|AK029791	Mus musculus dynein, axonemal, heavy chain 2 (Dnah2), mRNA [NM_001081330]	GO:0000166(nucleotide binding)|GO:0001539(ciliary or flagellar motility)|GO:0003774(motor activity)|GO:0003777(microtubule motor activity)|GO:0005524(ATP binding)|GO:0005737(cytoplasm)|GO:0005856(cytoskeleton)|GO:0005858(axonemal dynein complex)|GO:0005874(microtubule)|GO:0005929(cilium)|GO:0007018(microtubule-based movement)|GO:0016887(ATPase activity)|GO:0017111(nucleoside-triphosphatase activi…	ATATAGTGACACTCTGACAGTACCTAGTGGCGCTAGCGGAAAAGGTGGAAGACTTGTATT	161.661	205	35.2	58.3	86.7	103	119	68.7	57	96	48.5	68.1	60	89.6	76.4	72.8	1.61932	1.64666	1.63299	1.01688
A_55_P2066578	Ifi204	interferon activated gene 204	gb|BC010546|gb|M31419|tc|TC1596340|nap|NAP096188-001	Mus musculus interferon activated gene 204, mRNA (cDNA clone MGC:18551 IMAGE:4018506), complete cds. [BC010546]	GO:0003690(double-stranded DNA binding)|GO:0003712(transcription cofactor activity)|GO:0005515(protein binding)|GO:0005634(nucleus)|GO:0005654(nucleoplasm)|GO:0005730(nucleolus)|GO:0006357(regulation of transcription from RNA polymerase II promoter)|GO:0016607(nuclear speck)|GO:0035458(cellular response to interferon-beta)|GO:0042771(DNA damage response, signal transduction by p53 class mediator …	GTAGAAGCCTATTGAAATATCAGTCCTATAAAGACCATCTCTTAATTCTAGGAAATGGTG	43.483	32.7	32.9	44.4	33.8	38.6	43.5	59.4	51.3	75.5	41.8	49.9	826	875	93	38.3	1.55927	1.70045	1.62986	1.09054
A_30_P01023620			chr6:86476240-86513483_F	lincRNA:chr6:86476240-86513483 forward strand		TGGCTTGGGAGAAAACAAGGCTTGAAGAGGAGCAGGCGAGGCTGAGTCAGTGACTCCAGA	95.8894	82.5	40.5	42.9	51.8	51.3	60.4	44.2	64	71.7	44.9	43.3	27.5	42.1	59.2	21.1	1.58025	1.67133	1.62579	1.05764
A_55_P1982325	Ndst4	N-deacetylase/N-sulfotransferase (heparin glucosaminyl) 4	ref|NM_022565|ens|ENSMUST00000173932|gb|AK132938|tc|TC1641103	Mus musculus N-deacetylase/N-sulfotransferase (heparin glucosaminyl) 4 (Ndst4), mRNA [NM_022565]	GO:0003824(catalytic activity)|GO:0005794(Golgi apparatus)|GO:0008146(sulfotransferase activity)|GO:0008152(metabolic process)|GO:0015016([heparan sulfate]-glucosamine N-sulfotransferase activity)|GO:0016020(membrane)|GO:0016021(integral to membrane)|GO:0016740(transferase activity)|GO:0016787(hydrolase activity)|GO:0019213(deacetylase activity)	CTGTGAATAAATTCCTATCGATGTTTTCTGTCAAATGAAAACATATATGCACGCATTGGC	35.1903	25.4	32.4	43.5	55.9	67.9	27.3	30.3	55.1	67.3	94.4	31.6	118	79.5	65.4	152	1.70062	1.54713	1.62387	0.909744
A_51_P452629	Tlr2	toll-like receptor 2	ref|NM_011905|ens|ENSMUST00000029623|gb|AF185284|gb|AK005043	Mus musculus toll-like receptor 2 (Tlr2), mRNA [NM_011905]	GO:0001774(microglial cell activation)|GO:0002224(toll-like receptor signaling pathway)|GO:0002237(response to molecule of bacterial origin)|GO:0002238(response to molecule of fungal origin)|GO:0002687(positive regulation of leukocyte migration)|GO:0002752(cell surface pattern recognition receptor signaling pathway)|GO:0002755(MyD88-dependent toll-like receptor signaling pathway)|GO:0004872(recep…	CCTTGGATGAAGGCCAGCAGGAAGTGTTTTGGGTAAATCTGAGAACTGCAATAAAGTCCT	151.635	174	92.5	116	86	300	120	129	156	179	96.3	141	922	1020	194	132	1.68649	1.5431	1.61479	0.914981
A_52_P476189	Gm3604	predicted gene 3604	ref|NM_001162910|gb|BC049144|tc|TC1590893|nap|NAP046145-1	Mus musculus predicted gene 3604 (Gm3604), mRNA [NM_001162910]	GO:0003674(molecular_function)|GO:0005575(cellular_component)|GO:0008150(biological_process)|GO:0046872(metal ion binding)	TGGAGAAAAATTCTACGAAGGAATTTCATTGTGAGCAACCTTTTTACAACGCCATCATTT	108.709	153	46.4	60.8	45.8	72.4	54.8	81.3	76.7	93.7	89.1	65	83.6	86.4	74.6	67.7	1.65302	1.54112	1.59707	0.932306
A_30_P01019469			chr14:21621875-21638625_R	lincRNA:chr14:21621875-21638625 reverse strand		AGAAGACACAGCGAAGAGATACATGCACGCTGCAGTCCTGAGTGAAGCACGGCCAACAGC	56.8128	62.3	40.6	37.3	36.6	76.5	61.9	62.8	67.3	56.8	65.9	58	44.9	60	75	58.8	1.65764	1.52279	1.59021	0.918651
A_55_P2035817	Gm1043	predicted gene 1043	ref|XM_003086431|ref|XM_355598	PREDICTED: Mus musculus predicted gene 1043 (Gm1043), mRNA [XM_003086431]	GO:0003674(molecular_function)|GO:0005575(cellular_component)|GO:0008150(biological_process)	AGACATCACCATCAGGCACATCACGATGGAAAAGATGAATGTCTGTCCCAGATGACCAAT	64.8844	49	46.6	48.4	60.2	80.9	97.1	120	73.7	76.7	69.8	61.2	120	65.6	119	84.2	1.58155	1.58471	1.58313	1.002
A_55_P1952543	Sh3rf1	SH3 domain containing ring finger 1	ref|NM_021506|ens|ENSMUST00000034060|gb|AK088003|gb|AK045470	Mus musculus SH3 domain containing ring finger 1 (Sh3rf1), mRNA [NM_021506]	GO:0005515(protein binding)|GO:0005737(cytoplasm)|GO:0005794(Golgi apparatus)|GO:0005829(cytosol)|GO:0008270(zinc ion binding)|GO:0016874(ligase activity)|GO:0042995(cell projection)|GO:0043066(negative regulation of apoptotic process)|GO:0043154(negative regulation of cysteine-type endopeptidase activity involved in apoptotic process)|GO:0046872(metal ion binding)|GO:2001237(negative regulation …	AAACTGGGCTGAAGGAATGCTGGCAGATAAAATAGGAATATTTCCAATTTCATACGTGGA	73.8656	34.3	33	34.3	27	44.1	36.3	45.8	53.7	52.6	40.3	25.7	22.5	39.2	32.1	34.4	1.62727	1.53353	1.5804	0.942391
A_30_P01026218			chr15:38630866-38640611_R	lincRNA:chr15:38630866-38640611 reverse strand		TCTCTGGGGTGGAGGCTGAGGGTGCTGACTCAGCTCCTGACCTGAGGGCACCTTTGTTTA	39.4169	57.4	39.9	47.7	46.1	52.8	83.6	74.3	64.5	73.3	59.8	66.6	60.1	56.7	77.3	62.6	1.61654	1.53669	1.57661	0.950602
A_55_P2373515						TGAAATACAGGGTTGGGGCCTCGGACTCACAAGGTATTATGATGTGATGCGACAAGATTT	86.8225	125	73.7	81.6	99.4	95.4	125	118	115	128	92	109	86.6	88.4	126	79.7	1.56038	1.56863	1.5645	1.00529
A_55_P2065958			gb|BY326470	BY326470 RIKEN full-length enriched, synovial fibroblasts Mus musculus cDNA clone L030036F09 5', mRNA sequence [BY326470]		AAGAAGTCAAGAAGTCTCTGGGCTACTTACCCTTCAACTCCATGTGTTACTAGTGATGGC	47.8819	42.1	34.7	41.6	43.6	51.8	88.4	81.5	54.6	64.4	52.4	35.3	51.7	54	112	77.8	1.57349	1.54808	1.56078	0.983851
A_51_P103222	Slc39a4	solute carrier family 39 (zinc transporter), member 4	ref|NM_028064|ens|ENSMUST00000073428|gb|AK146977|gb|AK154089	Mus musculus solute carrier family 39 (zinc transporter), member 4 (Slc39a4), mRNA [NM_028064]	GO:0005385(zinc ion transmembrane transporter activity)|GO:0005768(endosome)|GO:0005886(plasma membrane)|GO:0006810(transport)|GO:0006811(ion transport)|GO:0006829(zinc ion transport)|GO:0006882(cellular zinc ion homeostasis)|GO:0016020(membrane)|GO:0016021(integral to membrane)|GO:0016023(cytoplasmic membrane-bounded vesicle)|GO:0016324(apical plasma membrane)|GO:0030001(metal ion transport)|GO:…	CTCTGCTTTACCTTCTTAAGCCACCTAATTGTTGGCCCCACTACGGGTAGCCAGAGGCTT	75.2651	114	88.5	100	117	174	150	167	142	151	127	162	389	409	300	212	1.60452	1.51	1.55726	0.941092
A_52_P618728			gb|M61952|tc|NP061620|tc|TC1730176|nap|NAP103700-1	Mouse pseudo anti-idiotype antibody-resistant variant IgK (Vk-Ox1 gene family) mRNA, VJ5 region. [M61952]		AAGTTCCAGCTACTTGCACTGGTACCAGCAGAAGTCAGGCACTTCCCCCAAACTCTGGAT	40.2878	38.2	39.8	44	58.1	69.3	109	102	60.9	68.3	56	63.4	54.3	59	114	69.9	1.53015	1.55227	1.54121	1.01446
A_30_P01018646			chr12:81719382-81731865_F	lincRNA:chr12:81719382-81731865 forward strand		AGAAAGACCACCATTAGGCAAAAGAATCCCATGGCCTCTGAGAGGGCAAAGCCCAGAATC	119.064	174	95	101	84.1	94.3	147	161	146	153	101	118	102	118	126	132	1.53684	1.51485	1.52585	0.985691

## Sheet: Table S2
Table S2. The NBH 1 week down-regulated genes.
GE2		Cy3 :252800513657					GE2	Normalization : Data Transformation											over 50							0.1–10
		Cy5 :252800513658					657_1_1	658_1_1	657_1_2	658_1_2	657_1_3	658_1_3	657_1_4	658_1_4	657_2_1	658_2_1	657_2_2	658_2_2	657_2_3	658_2_3	657_2_4	658_2_4
							Y1		Y2		Y3		Y4		Y5		Y6		Y7		Y8		Y5/Y2
Probe Name	Gene Symbol	Gene Name	Accession String	Description	GO_ID	SEQUENCE	gProcessed Signal	rProcessed Signal	gProcessed Signal	rProcessed Signal	gProcessed Signal	rProcessed Signal	gProcessed Signal	rProcessed Signal	gProcessed Signal	rProcessed Signal	gProcessed Signal	rProcessed Signal	gProcessed Signal	rProcessed Signal	gProcessed Signal	rProcessed Signal	gProcessed Signal	rProcessed Signal	aveFOLD
A_30_P01023422			chr7:50509139-50526856_R	lincRNA:chr7:50509139-50526856 reverse strand		CATTTACCAGTGACTATATTCTTACATTTACCCTTAGCACTAGAACAGAATACCAGGGGA	0.01	0.01	73.4	290	2.91	90.2	8.06	0.01	0.01	0.01	0.01	0.01	0.01	0.01	5.24	0.01	0.00013624	3.44828e-05	8.53613e-05	0.253103
A_30_P01025725			chr13:113555055-113564665_F	lincRNA:chr13:113555055-113564665 forward strand		CCACATCTTGGGTGGAATTTGATGTGTTTCTAGAATATCTTGATCAAGGAGAAAAAGATA	205.206	16.1	75.6	93	0.01	1.24	0.01	0.0768	0.01	0.01	0.01	0.01	0.01	0.01	0.01	0.01	0.000132275	0.000107527	0.000119901	0.812903
A_55_P2416837	1700084F23Rik	RIKEN cDNA 1700084F23 gene	ref|NR_045965|gb|AK006991|riken|1700084F23|nap|NAP091853-1	Mus musculus RIKEN cDNA 1700084F23 gene (1700084F23Rik), long non-coding RNA [NR_045965]		AGACTATCACCTACGATGGAGGACCTTGCTTTTTGTTCATGAAACCTCATTGACCCTCTG	3.18965	0.01	95.7	172	71.8	31.4	62	38.5	8.91	10.3	13.4	9.52	0.01	0.01	59.4	32.2	0.0931034	0.0598837	0.0764936	0.643196
A_66_P106060	Dtx3l	deltex 3-like (Drosophila)	gb|AK090152|tc|TC1584693|riken|G630007B09|nap|NAP072888-1	Mus musculus adult male accessory axillary lymph node cDNA, RIKEN full-length enriched library, clone:G630007B09 product:hypothetical protein, full insert sequence. [AK090152]	GO:0004842(ubiquitin-protein ligase activity)|GO:0005634(nucleus)|GO:0005737(cytoplasm)|GO:0006281(DNA repair)|GO:0006302(double-strand break repair)|GO:0006974(response to DNA damage stimulus)|GO:0008270(zinc ion binding)|GO:0010390(histone monoubiquitination)|GO:0016568(chromatin modification)|GO:0016874(ligase activity)|GO:0042393(histone binding)|GO:0046872(metal ion binding)	GCTGTGGCACCATTGTGATTAATTATGAAATAAAAGATGGCATCCAAACAGTAAGTGTGC	9.72693	5.82	95.8	125	12	21.1	18.7	17.1	8.74	10.8	1.07	39.5	12.5	17.1	4.5	9.74	0.0912317	0.0864	0.0888159	0.947039
A_55_P1978636			ens|ENSMUST00000177969|ens|ENSMUST00000179982|tc|TC1642683	predicted gene 10715 [Source:MGI Symbol;Acc:MGI:3642376] [ENSMUST00000177969]		GTCATTTTTCAAGTTGTCAAGTGGAAGTTTCTCATTTTCCATGATTTTCAGCTTTCTAGC	69.4538	86.7	198	297	26.2	40.5	141	270	13.5	34.4	36	29.7	20	31.7	32.4	44.3	0.0681818	0.115825	0.0920034	1.69877
A_55_P2119025	2610318N02Rik	RIKEN cDNA 2610318N02 gene	ref|NM_183287|ens|ENSMUST00000093336|gb|BC039993|tc|TC1583192	Mus musculus RIKEN cDNA 2610318N02 gene (2610318N02Rik), mRNA [NM_183287]	GO:0003674(molecular_function)|GO:0005575(cellular_component)|GO:0008150(biological_process)	AAACTAGGAACTCCAGGACCTTGTGGAGAGAAACAGATGTTCACCTCTTTGTATGGAAAA	2.05371	28.7	61	55.2	0.107	30.3	42.3	171	8.47	2.65	1.61	6.64	0.01	0.01	4.22	0.453	0.138852	0.0480072	0.0934299	0.345743
A_52_P398989	Cytip	cytohesin 1 interacting protein	ref|NM_139200|ens|ENSMUST00000028175|gb|AK172071|gb|AK157859	Mus musculus cytohesin 1 interacting protein (Cytip), mRNA [NM_139200]	GO:0005737(cytoplasm)|GO:0005768(endosome)|GO:0005938(cell cortex)|GO:0030155(regulation of cell adhesion)	GACTCTCATTATTTTCGCCCATTTCAATTTTTATTTTCTGCCTGAACATTCATGCCAAGG	1.08888	241	67.5	76.5	26	83.1	34.7	33.2	9.01	4.78	7.66	9.32	82.8	80.8	33.6	25.1	0.133481	0.0624837	0.0979826	0.468107
A_55_P2465382			ens|ENSMUST00000099683|ens|ENSMUST00000143083|ens|ENSMUST00000178348|ens|ENSMUST00000178641	predicted gene 10800 [Source:MGI Symbol;Acc:MGI:3641657] [ENSMUST00000099683]		GAGTGGACATTTATAAATTTTCCACCTTTTTCAGTTTTCCTCGCCATATTTCACGTCCTA	126.04	180	350	446	79.3	89.4	262	337	23.9	64.3	66.7	82.1	44.4	56.3	112	152	0.0682857	0.14417	0.106228	2.11128
A_55_P2165554			ens|ENSMUST00000099046|ens|ENSMUST00000179839|ens|ENSMUST00000179272|ens|ENSMUST00000143083	predicted gene 10718 [Source:MGI Symbol;Acc:MGI:3642028] [ENSMUST00000099046]		GACATTTTTCAAGTTGTCAAGTGGATGTTTCTCATTTTCCATGATTTTCAGCTTTCTTGC	112.778	144	298	353	43.7	75.7	205	301	29.6	52.6	49.3	70.6	39.9	47.6	51.6	59.2	0.0993289	0.149008	0.124169	1.50015
A_30_P01018148			chr7:6296401-6311486_R	lincRNA:chr7:6296401-6311486 reverse strand		ATTCCTAGTGCCAAGAGCTGGCTTTTCGGCATTTACTATGTTCCTGTGTGTTCCTCTACT	31.2725	38.7	51.8	53.9	34.2	69.1	126	85	8.72	5.13	14.9	26.7	26.9	27.4	99.1	91.2	0.16834	0.0951763	0.131758	0.565382
A_55_P2088375	Tnnt3	troponin T3, skeletal, fast	ref|NM_001163664|ref|NM_001163665|ref|NM_001163667|ref|NM_001163666	Mus musculus troponin T3, skeletal, fast (Tnnt3), transcript variant 1, mRNA [NM_001163664]	GO:0003009(skeletal muscle contraction)|GO:0003779(actin binding)|GO:0005523(tropomyosin binding)|GO:0005861(troponin complex)|GO:0006937(regulation of muscle contraction)|GO:0006942(regulation of striated muscle contraction)|GO:0030172(troponin C binding)|GO:0030899(calcium-dependent ATPase activity)|GO:0031013(troponin I binding)|GO:0043462(regulation of ATPase activity)|GO:0048306(calcium-depe…	GTACCAACTGGAGACTGACAAATTCGAGTTTGGGGAGAAGCTGAAACGTCAGAAATATGA	29.3723	41.4	288	172	12.2	14	3.6	2.69	34.8	27.4	12.9	4.19	24.2	23.3	8.48	3.06	0.120833	0.159302	0.140068	1.31836
A_30_P01025811			chr14:33115110-33131171_F	lincRNA:chr14:33115110-33131171 forward strand		CAGAACCCAGGACACAGGAGCAGAGTGCTCATTAGAAGGTGATAAATGTCACGCCGTGGA	18.5677	58.7	197	228	176	36.4	0.01	19.4	19.7	42.9	7.33	28.2	3.72	38.3	24.6	20.3	0.1	0.188158	0.144079	1.88158
A_51_P104939	Klra5	killer cell lectin-like receptor, subfamily A, member 5	ref|NM_008463|ens|ENSMUST00000014683|gb|BC120550|gb|BC137708	Mus musculus killer cell lectin-like receptor, subfamily A, member 5 (Klra5), mRNA [NM_008463]	GO:0005886(plasma membrane)|GO:0007155(cell adhesion)|GO:0016020(membrane)|GO:0016021(integral to membrane)|GO:0030246(carbohydrate binding)	GGACTGTTCTCTGGTATCTATTTTGACAGAACAGAGTTCATCTTCCTTCCTCTTGGAGAC	27.2853	35.1	84	56.5	56.6	82.1	107	116	21.8	2.05	33.1	34.7	48.5	48.8	126	100	0.259524	0.0362832	0.147903	0.139807
A_55_P2047554						AACAATCTCCCAAACATATGTGTGAGTTTTCATAAGTTGCATGTGCAGGTTTGCCTCTGG	86.8441	938	3280	50.8	592	437	565	639	137	13.1	665	6.61	687	0.01	290	5.2	0.0417683	0.257874	0.149821	6.17392
A_55_P2138104			ens|ENSMUST00000099050|ens|ENSMUST00000099049|ens|ENSMUST00000177817|ens|ENSMUST00000099683	predicted gene 10720 [Source:MGI Symbol;Acc:MGI:3641687] [ENSMUST00000099050]		GTCATTTTTCAAGTCGTCAAGTGGATGTTTCTCATTTTCCATGATTTTCAGTTTTCTCGC	198.454	237	465	551	79.7	101	346	400	61.6	94.7	74.2	86.4	75.5	75.2	101	96.1	0.132473	0.171869	0.152171	1.29739
A_55_P1999232	Defb45	defensin beta 45	ref|NM_001037752|ens|ENSMUST00000131096|ens|ENSMUST00000109834|gb|AY591384	Mus musculus defensin beta 45 (Defb45), mRNA [NM_001037752]	GO:0003674(molecular_function)|GO:0005575(cellular_component)|GO:0005576(extracellular region)|GO:0006952(defense response)|GO:0008150(biological_process)|GO:0042742(defense response to bacterium)	AAAGTTTCTACATCTTCTGCTGGAATGGCAAACTGTGCTGTGTGAAGCCCAAGAATGTGC	37.9686	22.2	95.1	82	47.1	42.3	41.2	58.5	19.5	10.7	34.1	25.4	29.8	30.1	57.4	53	0.205047	0.130488	0.167768	0.636379
A_51_P460643	Hoxb3	homeobox B3	ref|NM_001079869|ref|NM_010458|ref|NM_010468|ens|ENSMUST00000055334	Mus musculus homeobox B3 (Hoxb3), transcript variant 1, mRNA [NM_001079869]	GO:0000122(negative regulation of transcription from RNA polymerase II promoter)|GO:0000979(RNA polymerase II core promoter sequence-specific DNA binding)|GO:0003677(DNA binding)|GO:0003700(sequence-specific DNA binding transcription factor activity)|GO:0005634(nucleus)|GO:0006351(transcription, DNA-dependent)|GO:0006355(regulation of transcription, DNA-dependent)|GO:0007275(multicellular organis…	ATCAAGATCTGGTTCCAGAACCGTCGCATGAAGTACAAGAAAGACCAGAAGGCCAAGGGG	7.20357	60.7	113	92.5	15	40.2	0.01	71.3	11.3	21.8	19.9	19.3	25.5	46	22.2	10.6	0.1	0.235676	0.167838	2.35676
A_55_P1952725						AATCTAGTGGACTGCTCTAGACCTCAAGGCAACAGGGGCTGTTATGTAGGTAATACATAC	14.1879	25.3	70	109	13.4	19.1	15.5	18	18.5	9.33	13.7	0.01	10.2	27.7	7.3	16.2	0.264286	0.0855963	0.174941	0.323878
A_52_P485450	Vta1	Vps20-associated 1 homolog (S. cerevisiae)	ref|NM_025418|ens|ENSMUST00000020018|ens|ENSMUST00000154132|gb|AK002611	Mus musculus Vps20-associated 1 homolog (S. cerevisiae) (Vta1), mRNA [NM_025418]	GO:0005515(protein binding)|GO:0005737(cytoplasm)|GO:0005768(endosome)|GO:0006810(transport)|GO:0015031(protein transport)|GO:0016020(membrane)	TTCTTAATTTATACACACTAAAGGAAGTTTTTGAAAGATCTGTAATATTTGGACAAACAA	4427.7	6260	3110	3900	3260	4200	3120	3910	678	542	2720	3680	3710	3830	3550	3000	0.218006	0.138974	0.17849	0.637478
A_52_P334796	Taar4	trace amine-associated receptor 4	ref|NM_001008499|ens|ENSMUST00000092660|gb|AY255547|gb|BC117729	Mus musculus trace amine-associated receptor 4 (Taar4), mRNA [NM_001008499]	GO:0001594(trace-amine receptor activity)|GO:0001662(behavioral fear response)|GO:0004871(signal transducer activity)|GO:0004930(G-protein coupled receptor activity)|GO:0005886(plasma membrane)|GO:0007165(signal transduction)|GO:0007186(G-protein coupled receptor signaling pathway)|GO:0007606(sensory perception of chemical stimulus)|GO:0007610(behavior)|GO:0007635(chemosensory behavior)|GO:000822…	TCTCTCCATGGCTACCACAGACTTCCTGTTGAGTTGCGTGGTCATGCCCTTCAGTATGAT	113.122	42	87	93.9	105	140	174	255	25.3	9.57	90.6	138	153	68.9	306	209	0.290805	0.101917	0.196361	0.350465
A_30_P01029362			chr7:99878349-99882258_R	lincRNA:chr7:99878349-99882258 reverse strand		ACTAAGTTGTAAAGCTCTTTTAAAAATTAGACCATTTCACATTCTCTTCTGTACTCAAAT	25.6957	30.7	67.6	109	52	65.9	35.4	103	15.3	19.7	31.3	67.7	52.5	60.2	59.4	42.1	0.226331	0.180734	0.203533	0.798537
A_55_P2057901			gb|AK149266|riken|A930006O16	Mus musculus adult retina cDNA, RIKEN full-length enriched library, clone:A930006O16 product:hypothetical protein, full insert sequence. [AK149266]		GCAGAGGCAAAAGAATTACTTAACTCCTGAACCATCTCTCTAGTTCTATGAAATCTTTTT	81.1542	41.7	131	77.1	25.9	26	109	202	27.8	16.7	24.8	20.5	14.2	33.6	79.2	62.7	0.212214	0.216602	0.214408	1.02068
A_52_P386109			nap|NAP112666-1|nap|NAP057982-1			GGGAAAGCTGACATTGAGAAGTTAGAAGGTATCTTAGGGAAGATGGGACTGGCACTTACA	40.7143	34.9	148	174	3.28	23.2	71.1	29.8	38.1	30.7	30.9	18.9	12.4	33	34.6	13.3	0.257432	0.176437	0.216935	0.685371
A_51_P246428	Olfr15	olfactory receptor 15	ref|NM_008762|ens|ENSMUST00000080917|gb|BC100679|gb|BC100680	Mus musculus olfactory receptor 15 (Olfr15), mRNA [NM_008762]	GO:0004871(signal transducer activity)|GO:0004930(G-protein coupled receptor activity)|GO:0004984(olfactory receptor activity)|GO:0005886(plasma membrane)|GO:0005938(cell cortex)|GO:0007165(signal transduction)|GO:0007186(G-protein coupled receptor signaling pathway)|GO:0007608(sensory perception of smell)|GO:0016020(membrane)|GO:0016021(integral to membrane)|GO:0050896(response to stimulus)|GO:0…	TTTCAATACGTGTGTCTCCCACTTGGTGGTAGTGTTTCTCTTCTATGGCTCTGCGATCTA	19.6908	24	101	72.3	67.6	112	196	167	27	12.4	52.6	55.1	63.1	63.2	234	137	0.267327	0.171508	0.219417	0.641565
A_51_P351166	Myod1	myogenic differentiation 1	ref|NM_010866|ens|ENSMUST00000072514|gb|BC103613|gb|BC103618	Mus musculus myogenic differentiation 1 (Myod1), mRNA [NM_010866]	GO:0000381(regulation of alternative nuclear mRNA splicing, via spliceosome)|GO:0000790(nuclear chromatin)|GO:0001047(core promoter binding)|GO:0003677(DNA binding)|GO:0003700(sequence-specific DNA binding transcription factor activity)|GO:0003705(RNA polymerase II distal enhancer sequence-specific DNA binding transcription factor activity)|GO:0005515(protein binding)|GO:0005634(nucleus)|GO:00056…	TTTTGTTGTTGTTGTTGTAGTCCTTCAGTTGTTTGTTTGTTTTTTCATGCGGCTCACAGC	21.351	38.9	61.2	77.7	94	101	114	137	12	19.2	42.3	77.5	68.2	90.4	151	135	0.196078	0.247104	0.221591	1.26023
A_55_P1998663	Gm3985	predicted gene 3985	ref|NM_001177589	Mus musculus predicted gene 3985 (Gm3985), mRNA [NM_001177589]		GGAGATAGCAGCACCTCTGTGGACTTCCTGTTACCCTTTTCTATAGTTACCATTTAGAAG	48.7356	48.7	221	263	99.5	118	170	173	47.8	61	81.5	86.6	70.9	98.9	145	135	0.21629	0.231939	0.224114	1.07235
A_51_P498429	Krtap15	keratin associated protein 15	ref|NM_013713|gb|BC116219|gb|AK132534|tc|TC1584771	Mus musculus keratin associated protein 15 (Krtap15), mRNA [NM_013713]	GO:0003674(molecular_function)|GO:0005575(cellular_component)|GO:0008150(biological_process)	GCTGCCACTCAACTGAAACAAGAACTCCTGAGAACATGTCTTACACTTGCAACTCTGGAA	15.8102	69.1	216	62.8	33.8	29.1	46.4	63	12.2	24.9	23.6	18.5	18.3	17.5	51.8	28.8	0.0564815	0.396497	0.226489	7.01994
A_30_P01024621			chr4:131734714-131741964_F	lincRNA:chr4:131734714-131741964 forward strand		AATATCGTCACAGCAGGTTTCTAGTCCTTGGGTACAAAGCAATGTCCTTCCAATACAACC	19.447	46.5	185	50.7	28.2	33.1	72	92.5	25.9	17.2	26.7	29.9	26.5	34.3	63.7	57.5	0.14	0.33925	0.239625	2.42322
A_55_P2024061	Gtpbp10	GTP-binding protein 10 (putative)	ref|NM_153116|ens|ENSMUST00000115441|gb|BC034507|gb|AK037413	Mus musculus GTP-binding protein 10 (putative) (Gtpbp10), mRNA [NM_153116]	GO:0000166(nucleotide binding)|GO:0000287(magnesium ion binding)|GO:0003924(GTPase activity)|GO:0005525(GTP binding)|GO:0005634(nucleus)|GO:0005739(mitochondrion)|GO:0008150(biological_process)|GO:0042254(ribosome biogenesis)	AGCCAGGGTTCTTAACTTCCAAGCCTTCTTCTCCAGCCCCTTTCTTTAATACTTTTTTAA	1506.59	1760	7110	4620	2020	2170	1890	2220	1370	1420	4480	5460	1720	1820	1890	1720	0.192686	0.307359	0.250023	1.59513
A_51_P131561	Plet1	placenta expressed transcript 1	ref|NM_029639|ens|ENSMUST00000114474|gb|AK005558|gb|BC017624	Mus musculus placenta expressed transcript 1 (Plet1), mRNA [NM_029639]	GO:0009897(external side of plasma membrane)|GO:0016020(membrane)|GO:0016021(integral to membrane)	CTACTAGCAGATTTCCACTGTGCCCAGACCAGTCGGTAGGTTTTGAAGGAAGTATATGAA	99.6544	71.2	108	86.1	112	115	74.4	123	39.4	12.3	88.3	119	77.1	104	125	115	0.364815	0.142857	0.253836	0.391588
A_51_P113026	Cryba1	crystallin, beta A1	ref|NM_009965|ens|ENSMUST00000078623|ens|ENSMUST00000124178|gb|AJ239052	Mus musculus crystallin, beta A1 (Cryba1), mRNA [NM_009965]	GO:0005212(structural constituent of eye lens)|GO:0005634(nucleus)|GO:0005737(cytoplasm)|GO:0007601(visual perception)|GO:0042803(protein homodimerization activity)|GO:0043010(camera-type eye development)	GAGAAAGAGAACTTTATTGGACGCCAGTGGGAAATCTGTGATGACTACCCTTCCTTGCAA	57.6135	84.6	115	71.5	14.3	203	69.6	44.9	42	10.7	15.5	16.8	10.5	35.8	56.8	31.8	0.365217	0.14965	0.257434	0.409757
A_30_P01030193			chr13:62734450-62785325_F	lincRNA:chr13:62734450-62785325 forward strand		TGTCTTTCAGTTCCTGGTTTTCTTGGTAAAGCTCCTCACTGAGCTGTTGCATCTCGTCTA	83.8588	26.9	74.9	75.4	73.2	81.7	129	125	26.6	12.1	15.8	37.7	36.9	24.1	162	115	0.35514	0.160477	0.257809	0.451871
A_30_P01023204			chr3:52002170-52004411_F	lincRNA:chr3:52002170-52004411 forward strand		CTTAGCAGATTTATTTTCACTTTGCTTGGATCAAGGTCCCTCTGGAAGGCCAGGAAAGGA	4.22955	11.2	82.3	97.1	28	17	46.1	61.2	32.2	13.2	23.1	27.7	21.3	14.9	83.5	38.2	0.391252	0.135942	0.263597	0.347455
A_55_P2150351						GTGTCTTTACTAGGTTTGGCGTGCTTTGGGGCTTTATCGAGTGGGCTCAGCTACCACACG	34.9296	47.5	89.9	102	117	143	167	103	13.3	40.1	65.5	89.9	77.7	89.9	162	192	0.147942	0.393137	0.27054	2.65737
A_55_P2241314	Otx2os1	Otx2 opposite strand transcript 1	gb|BU504680	AGENCOURT_8968740 NIH_MGC_94 Mus musculus cDNA clone IMAGE:6492575 5', mRNA sequence [BU504680]	GO:0003674(molecular_function)|GO:0005575(cellular_component)|GO:0008150(biological_process)	TTGACTGGGTGACTCACAGTTATGGAGAAAAGACTAGAGCTGCAGTGCAAAGACTATGCA	22.2388	25.8	53.8	93.1	9.52	39.8	32.6	22.2	15.4	24	3.44	7.71	5.29	0.01	13.8	8.79	0.286245	0.257787	0.272016	0.900582
A_30_P01027980			chr4:55465247-55494547_R	lincRNA:chr4:55465247-55494547 reverse strand		TCTCCACTACTGACTGCAGACCAGGTATTGTAAGCCGAGCTACCACATTTGTTTTCTACA	27.8017	7.48	57.1	54.1	90.1	163	233	250	14.4	16	49.1	42.6	64.2	71.7	285	172	0.252189	0.295749	0.273969	1.17273
A_55_P2173516	Arsi	arylsulfatase i	ref|NM_001038499|ens|ENSMUST00000040359|gb|BC138970|gb|BC141169	Mus musculus arylsulfatase i (Arsi), mRNA [NM_001038499]	GO:0003824(catalytic activity)|GO:0005575(cellular_component)|GO:0005576(extracellular region)|GO:0005783(endoplasmic reticulum)|GO:0008152(metabolic process)|GO:0008484(sulfuric ester hydrolase activity)|GO:0016787(hydrolase activity)|GO:0046872(metal ion binding)	TTTGCAAGCTTCGATCTTTTTTCCGTAAACTCAATACCAGGCTGATGTCCCACCGGATCT	46.4869	36.6	103	50.6	28.2	29.6	248	62.8	26.2	15.6	40.1	15.4	55.6	65.8	56.7	46.4	0.254369	0.3083	0.281335	1.21202
A_30_P01019843			chr14:33901152-33976129_R	lincRNA:chr14:33901152-33976129 reverse strand		TGACTTTCTGGCCTACCATGTTCTCATTCCGGAAGTGTACCTCATCGTATCTTCCTTCTT	41.4369	11.2	71.7	85	94.4	148	160	261	7.71	39.2	53.4	91.5	75.9	113	285	189	0.107531	0.461176	0.284354	4.28876
A_55_P2003973						CTCCGTCATTCTCCAGCCTGCTTTTTAATGGTCTGAAACGGGCTTATCCACAGCCAGCAT	241.661	136	354	416	397	394	367	507	110	111	328	375	290	254	369	310	0.310734	0.266827	0.288781	0.858698
A_30_P01017701			chr7:57116623-57121735_F	lincRNA:chr7:57116623-57121735 forward strand		GTGTTTCTGAGCACTGCTTGGCTGCCTGTAACAGTACATCATCCTGGGTGATGAATTCTG	272.41	81.6	138	202	60.2	80.2	94.3	98.4	40.7	58.5	49.1	59.4	70.6	72.5	74.1	71.8	0.294928	0.289604	0.292266	0.98195
A_55_P1971619			nap|NAP114307-1			CTCCAGAAATGAGATCCTGATCACAAGAAAAATTTGGGATCTTTTGGAAGAATAAAAGAC	273.913	586	194	360	268	453	225	438	96.8	34	225	362	287	434	382	448	0.498969	0.0944444	0.296707	0.189279
A_51_P486497	A530017D24Rik	RIKEN cDNA A530017D24 gene	gb|AK040705|tc|TC1647795|tc|TC1610276|riken|A530017D24	Mus musculus adult male aorta and vein cDNA, RIKEN full-length enriched library, clone:A530017D24 product:unclassifiable, full insert sequence. [AK040705]		TTATCACCTTTTGGTACAACAATAAGCTACGCCATATGCAAAGACTGTGTATGAGGAATA	184.19	223	623	906	332	417	231	314	209	242	332	346	301	300	365	270	0.335474	0.267108	0.301291	0.796212
A_30_P01031535			chr3:84617945-84618316_R	lincRNA:chr3:84617945-84618316 reverse strand		AGATCCTGGAACCGAGAGACGGCTGGAAAAGTTAACCTACAGCCAGTGGCTGCACCTGCT	32.4866	19.9	130	97.5	13.7	54.8	35.8	43.6	35.2	32.8	31.2	22.9	13.7	27.8	30	18.9	0.270769	0.33641	0.30359	1.24242
A_30_P01032539			chr13:94187304-94188195_R	lincRNA:chr13:94187304-94188195 reverse strand		TTCTCCATTGTGGTTGCTGGGTATTGTTCGCGGAAGGATATTTAAGTGAATTTTTAGTGA	19.4514	45.4	61.3	93.8	73.6	93.6	103	84.6	12.1	38.9	59.5	76.3	46.3	60.6	81.2	59.5	0.19739	0.414712	0.306051	2.10098
A_55_P1987775	Pla2g4d	phospholipase A2, group IVD	ref|NM_001024137|ens|ENSMUST00000094665|gb|AK019180|gb|AB195276	Mus musculus phospholipase A2, group IVD (Pla2g4d), mRNA [NM_001024137]	GO:0004620(phospholipase activity)|GO:0004623(phospholipase A2 activity)|GO:0005737(cytoplasm)|GO:0006629(lipid metabolic process)|GO:0008152(metabolic process)|GO:0009395(phospholipid catabolic process)|GO:0016020(membrane)|GO:0016042(lipid catabolic process)|GO:0016787(hydrolase activity)|GO:0031410(cytoplasmic vesicle)|GO:0046872(metal ion binding)	CTGTTCTGTCCCTAGTTTGTTGAGTGGTTTTGTTGTTAGTGATATCATAAAAAGGTATTG	301.317	431	77.7	131	33.2	60.3	67.4	75.5	26.1	37.8	21.9	34.3	13.4	49.4	65.6	51.9	0.335907	0.28855	0.312228	0.859016
A_30_P01030273			chr14:52874069-52877398_R	lincRNA:chr14:52874069-52877398 reverse strand		CCCAAAACCTAAAAGTAAACTTCTTGTGTATTTGTCTTATGCAATATGTCTACCTCTGCA	50.9432	73.6	70.6	119	73.8	91.6	57.5	79.7	27.6	27.8	49.3	88.6	91.1	101	65.5	58.8	0.390935	0.233613	0.312274	0.597576
A_30_P01033113			chr1:167797581-167803031_F	lincRNA:chr1:167797581-167803031 forward strand		TGAAATTTAGCAACCTGATCATGGTTGTTGGTCTTTCCTCTCTCACTGTCTGTTTATCTA	74.3247	87.3	138	286	149	167	340	292	59	58.1	111	125	132	185	318	227	0.427536	0.203147	0.315342	0.475157
A_30_P01018570			chr12:83271350-83357214_F	lincRNA:chr12:83271350-83357214 forward strand		TCTACAGTTAGAAGCATGAAGCTTATGTATGAGCAGGGTGGCGGCTGGTCAATCTTCTTT	39.8244	21.6	74.9	107	97	159	136	154	23.2	34.4	75.9	95.2	96.6	89.9	158	120	0.309746	0.321495	0.315621	1.03793
A_30_P01018506			chr9:113648970-113715170_R	lincRNA:chr9:113648970-113715170 reverse strand		TCAGCTTCTCTCCTACGTGTCTATAAATCTCCACTACAGCTGATAGTGCAGCATTTCTCA	768.293	417	754	872	977	939	609	838	353	154	654	763	778	657	763	821	0.46817	0.176606	0.322388	0.377225
A_55_P1971527						ATCTGCTAATTGCTCTTCAGGTGTTAGTACTTTAGATTCTTCAGGTTCTTCTAACCTCTT	35.3852	48.2	61	238	62.1	86.3	85.6	78.5	29.5	41.2	35.9	35.4	48.5	70.9	61.5	39.7	0.483607	0.173109	0.328358	0.357955
A_55_P2105507	Gm4681	predicted gene 4681	ref|XR_168533|ref|XR_168733	PREDICTED: Mus musculus predicted gene 4681 (Gm4681), misc_RNA [XR_168533]	GO:0003674(molecular_function)|GO:0005575(cellular_component)|GO:0008150(biological_process)	AATATTAAGTGCTCTTGAACAGCTACAGCACCGAAAAACCCCTGGACAAATGACAAGCAG	3.07248	22.6	56.6	82	254	19.3	27.3	8.16	26	16.4	20.1	12	15.4	9.39	35	19.2	0.459364	0.2	0.329682	0.435385
A_30_P01026560			chr1:42972297-42972716_R	lincRNA:chr1:42972297-42972716 reverse strand		TAGGCTCTCAGCACTTGCCTTCATCTACTTTGAATCAAATGCCTTCTCTGTTTCTTCTCT	36.5106	36.9	57.3	71.7	110	85.1	167	149	22.4	19.5	58.2	65	68.4	81	210	114	0.390925	0.271967	0.331446	0.6957
A_55_P2085391						TCTTCGTAGCAGCTGTGACTGGGTTCTTTCTGCGTGGTGAGAGGCGGGTTGCTTTGTGCA	53.9318	195	157	94.8	51	81.7	139	157	37.1	41.4	46	80.6	67.9	92.2	198	131	0.236306	0.436709	0.336507	1.84807
A_52_P374882	Lep	leptin	ref|NM_008493|ens|ENSMUST00000069789|gb|U18812|gb|AK142589	Mus musculus leptin (Lep), mRNA [NM_008493]	GO:0000122(negative regulation of transcription from RNA polymerase II promoter)|GO:0001542(ovulation from ovarian follicle)|GO:0001890(placenta development)|GO:0001932(regulation of protein phosphorylation)|GO:0002021(response to dietary excess)|GO:0003300(cardiac muscle hypertrophy)|GO:0005179(hormone activity)|GO:0005515(protein binding)|GO:0005576(extracellular region)|GO:0005615(extracellula…	AGTTTGGATCTTGGGTTTTCTGTTAAGAGATGGTTAGCTTATACCTAAAACCATAATGGC	68.5532	15.7	69.4	67.8	90.5	53.8	170	108	24.3	21.9	44.6	61.3	27.1	48.8	109	132	0.350144	0.323009	0.336576	0.922503
A_30_P01025370			chr14:52874069-52877398_R	lincRNA:chr14:52874069-52877398 reverse strand		GCTCTATGTGTAGCTATGCAATCAAATTTAGCTCTCTTTGTGTTTTCTTGGTCTACATTT	64.906	66.3	114	135	92.9	143	148	186	33.5	51.6	88.8	92.3	101	113	186	141	0.29386	0.382222	0.338041	1.3007
A_52_P374882	Lep	leptin	ref|NM_008493|ens|ENSMUST00000069789|gb|U18812|gb|AK142589	Mus musculus leptin (Lep), mRNA [NM_008493]	GO:0000122(negative regulation of transcription from RNA polymerase II promoter)|GO:0001542(ovulation from ovarian follicle)|GO:0001890(placenta development)|GO:0001932(regulation of protein phosphorylation)|GO:0002021(response to dietary excess)|GO:0003300(cardiac muscle hypertrophy)|GO:0005179(hormone activity)|GO:0005515(protein binding)|GO:0005576(extracellular region)|GO:0005615(extracellula…	AGTTTGGATCTTGGGTTTTCTGTTAAGAGATGGTTAGCTTATACCTAAAACCATAATGGC	12.9473	46.1	57	166	85.1	83.8	113	95.8	26.2	36.2	24.9	58	50.4	58.3	106	92.7	0.459649	0.218072	0.338861	0.474432
A_30_P01032597			chr14:55433382-55452757_F	lincRNA:chr14:55433382-55452757 forward strand		TAGGCATAGGCAATGAAGCCCAGGCAGCAGGCGTTGAAGAAGAGTGTATTGAACAGGGAC	1072.14	786	1080	1270	1400	1340	825	1390	510	262	846	969	916	892	1480	1040	0.472222	0.206299	0.339261	0.436869
A_51_P351166	Myod1	myogenic differentiation 1	ref|NM_010866|ens|ENSMUST00000072514|gb|BC103613|gb|BC103618	Mus musculus myogenic differentiation 1 (Myod1), mRNA [NM_010866]	GO:0000381(regulation of alternative nuclear mRNA splicing, via spliceosome)|GO:0000790(nuclear chromatin)|GO:0001047(core promoter binding)|GO:0003677(DNA binding)|GO:0003700(sequence-specific DNA binding transcription factor activity)|GO:0003705(RNA polymerase II distal enhancer sequence-specific DNA binding transcription factor activity)|GO:0005515(protein binding)|GO:0005634(nucleus)|GO:00056…	TTTTGTTGTTGTTGTTGTAGTCCTTCAGTTGTTTGTTTGTTTTTTCATGCGGCTCACAGC	44.6788	64.7	139	86.2	74	90.1	115	135	44.7	31.2	47.4	59.9	79.3	115	139	104	0.321583	0.361949	0.341766	1.12552
A_51_P358122	Olfr332	olfactory receptor 332	ref|NM_001011770|ens|ENSMUST00000180165|tc|TC1599563|nap|NAP108583-1	Mus musculus olfactory receptor 332 (Olfr332), mRNA [NM_001011770]	GO:0004871(signal transducer activity)|GO:0004930(G-protein coupled receptor activity)|GO:0004984(olfactory receptor activity)|GO:0005886(plasma membrane)|GO:0007165(signal transduction)|GO:0007186(G-protein coupled receptor signaling pathway)|GO:0007608(sensory perception of smell)|GO:0016020(membrane)|GO:0016021(integral to membrane)|GO:0050896(response to stimulus)|GO:0050911(detection of chem…	AGATGGTGAAGTTTGTGTCAACTATTATCTTTCTCCTGACCCCATTCACTTTGATCCTGA	51.696	94.6	130	118	179	183	296	379	43.1	43	108	124	149	172	464	296	0.331538	0.364407	0.347973	1.09914
A_30_P01021095			chr14:65720392-65769859_F	lincRNA:chr14:65720392-65769859 forward strand		ACTAGCTATATCTCTGGCTGTCTTACAGTCTTGGGCTCTGGTGATCTGTCATCAAAGAAT	29.6385	52.5	78.5	75.8	82.6	108	179	187	27.2	26.5	52.1	56.1	50.9	65.7	175	127	0.346497	0.349604	0.348051	1.00897
A_30_P01019017			chr18:63355660-63369610_F	lincRNA:chr18:63355660-63369610 forward strand		GTAATTAAAGTGACCTCTCCAAAATCTCCCACAAGCTCTGCCTATGAAAATCATTCACAG	52.8346	522	184	90.9	311	435	133	148	73.4	27.1	46.9	57.5	149	72.1	149	67.4	0.398913	0.29813	0.348521	0.747355
A_51_P122141	Mamstr	MEF2 activating motif and SAP domain containing transcriptional regulator	ref|NM_172418|ens|ENSMUST00000153706|ens|ENSMUST00000098455|ens|ENSMUST00000150045	Mus musculus MEF2 activating motif and SAP domain containing transcriptional regulator (Mamstr), mRNA [NM_172418]	GO:0001076(RNA polymerase II transcription factor binding transcription factor activity)|GO:0003676(nucleic acid binding)|GO:0005515(protein binding)|GO:0005634(nucleus)|GO:0006351(transcription, DNA-dependent)|GO:0006355(regulation of transcription, DNA-dependent)|GO:0006357(regulation of transcription from RNA polymerase II promoter)|GO:0006366(transcription from RNA polymerase II promoter)|GO:…	TTCTAGTTAGAGGTGAGAGGACCAGAAGCTACTAGTGAGAGGTGACTACAAACTCCCTAT	66.7828	55.3	183	96.7	99.8	154	79.3	79.9	51.2	40.9	76.8	82.6	97.4	107	71.1	84.4	0.279781	0.422958	0.35137	1.51174
A_30_P01027647			chr4:131734714-131741964_R	lincRNA:chr4:131734714-131741964 reverse strand		TTCTTCCTGTACTGAATCATTCAATTCAGCCTGTTATTTTGCGCACCCTTGCTGCTCCTG	109.847	77.3	128	103	80.7	83	163	200	38.6	42	41.8	42.5	38.4	37.5	172	160	0.301563	0.407767	0.354665	1.35218
A_55_P2288690	1700066J03Rik	RIKEN cDNA 1700066J03 gene	gb|CN840722	AGENCOURT_24959256 NIH_MGC_169 Mus musculus cDNA clone IMAGE:30916952 5', mRNA sequence [CN840722]		TGAGCTCTGATCTACGATCAGCATCATCATCGCCGCGCCTTCAACGGATCTACTCCACGA	96.9243	54.5	78.3	72.6	69	68.8	123	147	23.1	30.2	40.5	44.5	43.8	38.9	182	109	0.295019	0.415978	0.355499	1.41
A_30_P01031570			chr16:9129538-9137898_F	lincRNA:chr16:9129538-9137898 forward strand		ATCACTGAGTAATTCTCGTTACCTCTCCTGACTGGAGGTGATGAAGACAATTTCTCCCAC	92.6752	26.8	81.3	81.7	117	92.4	62.5	111	41.1	17	168	74	72	67.3	117	83.8	0.505535	0.208078	0.356807	0.4116
A_30_P01019620			chr4:128207615-128242898_R	lincRNA:chr4:128207615-128242898 reverse strand		ATCCCTGAAGCAGGTAACCTTTCTGACAACGGAATAGCACCGTGCTCCCAACCTGCCGCA	106.323	148	165	246	105	110	134	123	75.2	63.8	78.6	87.8	75.6	73.5	108	56.1	0.455758	0.25935	0.357554	0.569052
A_55_P1968638	Gm9325	predicted gene 9325	ref|XM_003085945|ref|XM_001003391	PREDICTED: Mus musculus predicted gene 9325 (Gm9325), partial mRNA [XM_003085945]	GO:0003674(molecular_function)|GO:0005575(cellular_component)|GO:0008150(biological_process)	ATTCCAGAAAGAAGACCAAAGAATCGGCTCAGATGGTGGAACCACCCAGGAAAAGAAGAT	48.998	50	66.5	71	6.63	11.8	20.9	9.07	33	15.7	18.1	13.1	5.17	28.5	18.4	22.3	0.496241	0.221127	0.358684	0.445604
A_30_P01025608			chr15:79764481-79809909_F	lincRNA:chr15:79764481-79809909 forward strand		AAGTCTTTGGTTCTCTGGCTACCCGTCTACCTACACACACCCTTGAGAATATTCAGAAGA	41.6264	44.1	85.1	119	80.4	183	206	177	40	29.8	79.3	75.1	76.1	85.2	258	144	0.470035	0.25042	0.360228	0.532769
A_30_P01021809			chr4:89048647-89066563_F	lincRNA:chr4:89048647-89066563 forward strand		GGAATTGCAGTTCTACATCATCACCTAAAGTCTTCCAGATTTTCCTGAAGAGAGGCAAAT	83.684	98.5	97.8	54.7	162	177	366	326	26.3	24.8	103	124	242	96.8	189	171	0.268916	0.453382	0.361149	1.68596
A_30_P01022328			chr5:22058025-22072475_F	lincRNA:chr5:22058025-22072475 forward strand		TGAGGGCAAATCATCTTCAGCCCCAGTAAACAGCAGTTGTTTAATACATGTGTGAAATAC	64.5324	130	156	136	89.2	97.8	69.8	87.1	51	54.2	54.4	85.8	76.6	73.9	81.2	72.6	0.326923	0.398529	0.362726	1.21903
A_66_P133525			gb|AK082053|tc|NP718970|riken|C130098L22|nap|NAP084462-1	Mus musculus 16 days embryo head cDNA, RIKEN full-length enriched library, clone:C130098L22 product:unclassifiable, full insert sequence. [AK082053]		AATGCTGAGAAATACTTTGTTTCCCAAATGTTCCCTTTCTCTACCTGTAAAAAGTGACAC	42.4445	42.4	64.3	52.3	68.7	47.1	88.4	94.8	26.8	16.3	41.4	36.4	61	62.7	184	90.9	0.416796	0.311663	0.36423	0.74776
A_55_P2243558						GTGAACATTTCAAGCCCTATCACCTCTGCATTTGGTTGCTTTTCTCATTGCTCTTTTGTT	62.435	66.7	120	153	193	235	324	279	47.5	50.9	111	167	129	153	512	334	0.395833	0.33268	0.364257	0.840454
A_55_P2019764						ATCGTTCTGTCAGGAACGCGCTTGCTCACTGCTTGGCTATGAATAAGCTAGTTTCATTGA	26.1882	21.2	146	70.7	31	32.4	42.6	52.6	24.9	39.9	39.7	27.6	33.4	28.6	57.6	39	0.170548	0.564356	0.367452	3.30908
A_30_P01021260			chr9:41488229-41545481_R	lincRNA:chr9:41488229-41545481 reverse strand		TGTAAAAGGTGGCTACTGTTCATGACACTCCTCTCTCTGGATTGTCCATCCTGACTTTGT	112.613	135	400	199	204	201	244	249	120	86.8	129	189	152	179	237	206	0.3	0.436181	0.36809	1.45394
A_55_P1997231						GGAGAAGTCTGGAAATCTGCACTGCCACACTGTTCGCCACTCCGTTTACAGGCAGGCTTG	110.65	61	222	129	55.9	110	123	104	72.4	53	50.6	54.2	48.2	74	110	94.6	0.326126	0.410853	0.368489	1.2598
A_30_P01026290			chr10:62262341-62271961_F	lincRNA:chr10:62262341-62271961 forward strand		GCAACAGCCACCACACTATCCTTTGTCATAATTCTTGTTATACATTTCTAGTATAGATGA	15.7746	22.9	58.3	87.9	66.1	57.7	52.2	59.8	22.7	30.6	36.3	53.8	36.7	44.5	86.3	86.3	0.389365	0.348123	0.368744	0.894078
A_55_P2095103	Gucy1a2	guanylate cyclase 1, soluble, alpha 2	ref|NM_001033322|ens|ENSMUST00000115733|gb|AK165150|riken|E530014A09	Mus musculus guanylate cyclase 1, soluble, alpha 2 (Gucy1a2), mRNA [NM_001033322]	GO:0000166(nucleotide binding)|GO:0004383(guanylate cyclase activity)|GO:0006182(cGMP biosynthetic process)|GO:0016829(lyase activity)|GO:0030828(positive regulation of cGMP biosynthetic process)	CTGTTTCAAATGACCATCATAGTTACATTCTTTTTTGCTTTATGTGCTTGTAAGGCACTC	572.269	612	820	1130	617	883	545	762	489	160	620	799	507	504	816	570	0.596341	0.141593	0.368967	0.237436
A_30_P01030439			chr7:99879368-99889978_R	lincRNA:chr7:99879368-99889978 reverse strand		AATGTCATAAGAGGTTTCTAGATTCCCTGGATGGTTGTGAATTCGAAGGTGAGTGCTGGA	43.6865	19.8	104	64.3	153	75.8	50.7	65.2	26	31.4	31.7	38.5	37	49.7	39.6	36.3	0.25	0.488336	0.369168	1.95334
A_55_P2101618	Gm10682	predicted gene 10682	gb|AK133033|riken|4930557G05	Mus musculus adult male testis cDNA, RIKEN full-length enriched library, clone:4930557G05 product:hypothetical protein, full insert sequence. [AK133033]	GO:0003674(molecular_function)|GO:0005575(cellular_component)|GO:0008150(biological_process)	CCAGGACCCAGAGTCCAAGTTTCTCTTTCTCTTCTTCTGAATTCTGACCACACCTCTTAA	132.485	29.2	103	54.5	46.4	64.1	103	81.8	34.5	22	27	44.6	49.8	44.1	95.4	46.7	0.334951	0.40367	0.369311	1.20516
A_30_P01022803			chr5:67854954-67869163_F	lincRNA:chr5:67854954-67869163 forward strand		CCTGCTTTAAAAGCCTTCAGGTGTCAGAGGCATGTGGATTTCGAGTGCCGTACAACGCCG	45.7156	57.1	83.6	77.3	4.6	11.6	25.2	45.8	28.5	30.8	22.4	22.2	14.1	16.4	25.8	14.2	0.340909	0.398448	0.369678	1.16878
A_30_P01024875			chr5:26374425-26393675_F	lincRNA:chr5:26374425-26393675 forward strand		CCTTCTCCTTTAATTTCAGTTCTTTATAATGTCGAGTTTGCCTGTGGTAGGGCCTGACCC	29.1066	126	66.2	189	81.5	123	154	153	34.2	43.9	49.6	77.2	80.7	82.1	144	115	0.516616	0.232275	0.374446	0.449609
A_30_P01018333			chr2:167388900-167402475_F	lincRNA:chr2:167388900-167402475 forward strand		AGTGTAACCTTCCTAGTCCGTTCATTTGCTTCCAGCTTCTCTAGCTTCTCATTAGTCTGC	21.3506	10.2	50.9	57	44	59.5	139	147	23.5	16.8	27.2	38	29.6	39.5	138	112	0.46169	0.294737	0.378213	0.638387
A_52_P397204	Csk	c-src tyrosine kinase	ref|NM_007783|ens|ENSMUST00000034863|gb|AK156058|gb|U05247	Mus musculus c-src tyrosine kinase (Csk), mRNA [NM_007783]	GO:0000166(nucleotide binding)|GO:0004672(protein kinase activity)|GO:0004713(protein tyrosine kinase activity)|GO:0004715(non-membrane spanning protein tyrosine kinase activity)|GO:0005515(protein binding)|GO:0005524(ATP binding)|GO:0005622(intracellular)|GO:0005737(cytoplasm)|GO:0005794(Golgi apparatus)|GO:0005813(centrosome)|GO:0005886(plasma membrane)|GO:0005911(cell-cell junction)|GO:0006468…	CCGTGTGTTTATTTTTTATTATTTTTCAACATAAGGAGAAAGAAAGTACCCAGCAAATGG	1841.66	2430	908	1050	622	914	624	738	537	178	557	672	784	843	457	584	0.59141	0.169524	0.380467	0.286644
A_55_P1973173	Vmn2r55	vomeronasal 2, receptor 55	ref|NM_001104645|ens|ENSMUST00000172743	Mus musculus vomeronasal 2, receptor 55 (Vmn2r55), mRNA [NM_001104645]	GO:0003674(molecular_function)|GO:0004871(signal transducer activity)|GO:0004930(G-protein coupled receptor activity)|GO:0005575(cellular_component)|GO:0007165(signal transduction)|GO:0007186(G-protein coupled receptor signaling pathway)|GO:0008150(biological_process)|GO:0016020(membrane)|GO:0016021(integral to membrane)	ATCTTACTGAAACCTGAGAAGAACACTCCTTCCTGGCTAAAGCAAGGCCATCATATATAG	37.872	49.2	137	77.2	70.1	49.2	104	109	52.8	29.3	48.6	27.4	44.9	42.6	95.8	79	0.385401	0.379534	0.382468	0.984775
A_55_P2127959	Zfp36l3	zinc finger protein 36, C3H type-like 3	ref|NM_001009549|ens|ENSMUST00000071711|ens|ENSMUST00000165081|gb|AY661338	Mus musculus zinc finger protein 36, C3H type-like 3 (Zfp36l3), mRNA [NM_001009549]	GO:0000288(nuclear-transcribed mRNA catabolic process, deadenylation-dependent decay)|GO:0000289(nuclear-transcribed mRNA poly(A) tail shortening)|GO:0003677(DNA binding)|GO:0003723(RNA binding)|GO:0005737(cytoplasm)|GO:0016020(membrane)|GO:0016021(integral to membrane)|GO:0017091(AU-rich element binding)|GO:0046872(metal ion binding)	CCGTCTGCCCATCTTCAGCCGCTTCTCAGACTCTGAAAAATGAAGCAAAAAGATGCCAGT	415.038	460	3270	711	825	1290	709	856	462	445	641	612	1070	555	1000	740	0.141284	0.625879	0.383582	4.42992
A_55_P2398915	D2Ertd640e	DNA segment, Chr 2, ERATO Doi 640, expressed	gb|AK141311|riken|C430026K24	Mus musculus 7 days embryo whole body cDNA, RIKEN full-length enriched library, clone:C430026K24 product:hypothetical protein, full insert sequence. [AK141311]		GCATAGTTGGCTATTATGTCATCTTTGGGACTACAGAGTGAAAGTTAGAAGATTTTAAAG	50.7517	44.3	66.1	84.4	68.7	116	60.8	60.1	24.9	33	36	55.7	57.5	60.5	35.5	40.1	0.376702	0.390995	0.383849	1.03794
A_55_P2440651	Gabpb2	GA repeat binding protein, beta 2	ref|NM_029885|ref|NM_172512|ens|ENSMUST00000070774|ens|ENSMUST00000141645	Mus musculus GA repeat binding protein, beta 2 (Gabpb2), transcript variant 1, mRNA [NM_029885]	GO:0005634(nucleus)|GO:0006351(transcription, DNA-dependent)|GO:0006355(regulation of transcription, DNA-dependent)|GO:0042803(protein homodimerization activity)|GO:0044212(transcription regulatory region DNA binding)|GO:0045944(positive regulation of transcription from RNA polymerase II promoter)|GO:0046982(protein heterodimerization activity)	GATCATGCCCTTTTCTGGCATGTGTGTATATCCACACACATACATTTATATATACATATC	41.2652	48.9	94	72.3	75.9	147	64.4	98.9	33.5	29.8	37.6	56	67.7	59.8	71.1	75.9	0.356383	0.412172	0.384277	1.15654
A_51_P217360	Gm16532	predicted gene, 16532	ref|NM_001134752|gb|AK046418|gb|AI848289|tc|TC1590155	Mus musculus predicted gene, 16532 (Gm16532), mRNA [NM_001134752]	GO:0003674(molecular_function)|GO:0005575(cellular_component)|GO:0008150(biological_process)	TCTTGATGTGTTAAGTTGGTGCTATTTTTGTGAAGTTGTGGTCTCATGGCTTAACTTGAC	54.7448	39.2	61.9	106	46.8	68.4	67.4	130	26.5	36.3	30.7	43.5	38.7	53.4	66.6	81.9	0.42811	0.342453	0.385281	0.799918
A_55_P1973858						AAAGCCAAGGAATAAGAAGTAGTGACCTGAAGCTGGGACTGTTGGAGTGTCATCTTCACT	822.916	2330	2050	2570	1890	2320	1810	2040	737	1060	1770	2120	2180	2200	1700	1690	0.359512	0.412451	0.385982	1.14725
A_55_P2007070	Vmn1r194	vomeronasal 1 receptor 194	ref|NM_001080972|ens|ENSMUST00000091737|tc|NP1260123	Mus musculus vomeronasal 1 receptor 194 (Vmn1r194), mRNA [NM_001080972]	GO:0003674(molecular_function)|GO:0005575(cellular_component)|GO:0008150(biological_process)	TATGCTGTTCTCAGCCCCTTTATTCTGATGAACAGAGATGTCCCTGTTGCTAAATCCTAG	20.6662	39.5	63.8	90.5	65.3	87	152	150	27.7	30.9	58	64.4	66.8	84.9	133	125	0.434169	0.341436	0.387803	0.786413
A_55_P1958758	Olfr965	olfactory receptor 965	ref|NM_001011859|ens|ENSMUST00000069342|tc|TC1652562|nap|NAP108703-1	Mus musculus olfactory receptor 965 (Olfr965), mRNA [NM_001011859]	GO:0004871(signal transducer activity)|GO:0004930(G-protein coupled receptor activity)|GO:0004984(olfactory receptor activity)|GO:0005886(plasma membrane)|GO:0007165(signal transduction)|GO:0007186(G-protein coupled receptor signaling pathway)|GO:0007608(sensory perception of smell)|GO:0016020(membrane)|GO:0016021(integral to membrane)|GO:0050896(response to stimulus)|GO:0050911(detection of chem…	ACTGTTGTGCCCATGCTGAACCCGTTGATCTACAGTCTGAGGAATAAGGATGTCAAAGTT	23.0337	65.4	55.1	135	98.5	39	53.9	48.3	27.9	36.4	32.5	37.4	36.8	45.7	67.2	45.9	0.506352	0.26963	0.387991	0.532494
A_30_P01024468			chr4:55593675-55629225_R	lincRNA:chr4:55593675-55629225 reverse strand		TGAGACAGGTTCTCACTAATTTGCCCTGGCCTTAAACTTGTGACCTTTGGTTGTTGGTCT	43.0132	84.9	83.9	66.4	59.2	72.8	110	161	19.6	36.4	72.4	84.8	78.7	85.9	145	137	0.233611	0.548193	0.390902	2.3466
A_55_P1993184						AATATCCCTGTTTAAGGTCTCAGCTGAGCCTCTTGTGGTCTGGTCCTTTCCGCTGGCCGG	66.8949	84.4	170	149	152	171	271	322	58.9	65	106	115	115	137	396	171	0.346471	0.436242	0.391356	1.2591
A_30_P01033410			chr13:34693404-34717987_F	lincRNA:chr13:34693404-34717987 forward strand		AAAGATGTGCACTGTGCCTGCCAGTGAACGTTTCACTGTGATGATCAAGACAAGACACAA	18.0018	53.5	75.5	60.5	38	62.9	66.4	64.9	15.9	34.7	46.9	40.4	31.5	37.6	49.2	38.9	0.210596	0.573554	0.392075	2.72348
A_30_P01023893			chr13:28918991-28919231_F	lincRNA:chr13:28918991-28919231 forward strand		AGGCTGTTTAGAGCATGGCTCTCCTGTCTTTGAAACTCTTTGGGGAATACCTTTCAAACT	44.484	42.2	145	65.1	39.1	80.8	107	89.3	48.5	29.5	50	54.2	60.1	54.4	106	70.1	0.334483	0.453149	0.393816	1.35478
A_30_P01029681			chr18:84759512-84760012_F	lincRNA:chr18:84759512-84760012 forward strand		CTAAACTCAAGAGTCAACCTTTCCTAGTCTATATTGCTGACTCATATATATCATGGCCAA	20.8587	19.7	165	57.5	50.1	58.6	56.3	55.3	26.7	36.1	46.2	57.8	49.5	34.9	57.5	43.8	0.161818	0.627826	0.394822	3.87982
A_51_P475138	Duox1	dual oxidase 1	ref|NM_001099297|ens|ENSMUST00000099461|gb|AK037033|tc|TC1601504	Mus musculus dual oxidase 1 (Duox1), mRNA [NM_001099297]	GO:0005515(protein binding)|GO:0005886(plasma membrane)|GO:0016020(membrane)|GO:0016021(integral to membrane)|GO:0016491(oxidoreductase activity)|GO:0019221(cytokine-mediated signaling pathway)|GO:0042335(cuticle development)|GO:0046872(metal ion binding)|GO:0051591(response to cAMP)|GO:0055114(oxidation-reduction process)|GO:0072593(reactive oxygen species metabolic process)	TGTGTTCTTCCTCTCTTCAAAATGGTTGGGAGATGTCTTAGAGTAGCCAGGGGCAACTTA	77.1327	98	61.4	81.6	58.3	73.4	76.5	132	24.9	31.4	34.4	58.5	40.9	38.4	89.7	77.7	0.405537	0.384804	0.395171	0.948874
A_55_P2001223	Mpz	myelin protein zero	ref|NM_008623|ens|ENSMUST00000111334|ens|ENSMUST00000070758|gb|AK157960	Mus musculus myelin protein zero (Mpz), mRNA [NM_008623]	GO:0005515(protein binding)|GO:0005886(plasma membrane)|GO:0016020(membrane)|GO:0016021(integral to membrane)|GO:0045217(cell-cell junction maintenance)	GAGATGTAAAGTTTCATTCCAACCTTCCTTTCCAAGTCTTGTACTCCTCCTTCGCCTTTA	93.2882	105	150	219	208	227	309	272	84.7	49.6	121	162	157	187	282	225	0.564667	0.226484	0.395575	0.401093
A_30_P01026301			chr17:3103174-3114885_R	lincRNA:chr17:3103174-3114885 reverse strand		TGAACGTTCCCACAGGTACTGCTAATTGCCTTCGCTCTTCCCAAATTCATGCAAAAGGAA	35.8301	54.8	58.1	65.6	84.8	99.1	121	150	24.8	24	60.4	101	88.9	97.1	133	121	0.42685	0.365854	0.396352	0.857101
A_55_P2191263	Gm10428	predicted gene 10428	gb|AK089738|riken|F830012G24|nap|NAP124280-1	Mus musculus activated spleen cDNA, RIKEN full-length enriched library, clone:F830012G24 product:unclassifiable, full insert sequence. [AK089738]	GO:0003674(molecular_function)|GO:0005575(cellular_component)|GO:0008150(biological_process)	GGTCTCTCTTCTGTATGGATTCTTTGAAGAACATTAAAAATTGTGGTATCCTTGGAAGAT	52.4678	79	63.3	114	89.6	134	102	160	29	38.5	46.4	124	60.3	124	63.6	126	0.458136	0.337719	0.397928	0.73716
A_30_P01021763			chr14:106250821-106261843_F	lincRNA:chr14:106250821-106261843 forward strand		TAACTAATGGACTCTTGTCATGTTTCCCTCTGTTCCTTCTATAGCACACATTGGAGTATA	111.008	99.4	142	184	202	242	288	346	54.8	75.6	180	211	188	202	356	299	0.385915	0.41087	0.398393	1.06466
A_55_P2169234	Pycr1	pyrroline-5-carboxylate reductase 1	ref|NM_144795|ens|ENSMUST00000170556|gb|AK139185|riken|A730060J19	Mus musculus pyrroline-5-carboxylate reductase 1 (Pycr1), mRNA [NM_144795]	GO:0004735(pyrroline-5-carboxylate reductase activity)|GO:0005739(mitochondrion)|GO:0006561(proline biosynthetic process)|GO:0006950(response to stress)|GO:0008652(cellular amino acid biosynthetic process)|GO:0016491(oxidoreductase activity)|GO:0034599(cellular response to oxidative stress)|GO:0042802(identical protein binding)|GO:0055114(oxidation-reduction process)	AATATCTCCTGGTGTATGTGTGTTGAGGGTTGGGCTATAGTCTGGTGATTGAGCATTTGC	9.74751	61.1	53.8	59.1	53.1	68.2	112	116	26.8	17.7	48.5	46.3	60.7	63.9	140	92.7	0.498141	0.299492	0.398817	0.60122
A_30_P01021784			chr10:6081900-6105500_F	lincRNA:chr10:6081900-6105500 forward strand		TATGTGCGATGGTGTTTTCTTTTCTTCCCTTTCTTTTGTGCTGGACTCAACCCTAGGCCT	26.7336	41.3	60.1	129	97.2	128	176	215	25.8	47.6	81.5	102	71.4	106	227	179	0.429285	0.368992	0.399138	0.859552
A_55_P2072915						AGATTTAGGAAAGGAAAGTACTACCACCGGAACTATGCTCTACCCATACCCAGAACTGAC	103.784	108	221	388	120	146	192	212	120	100	101	117	126	154	166	128	0.542986	0.257732	0.400359	0.474656
A_51_P104939	Klra5	killer cell lectin-like receptor, subfamily A, member 5	ref|NM_008463|ens|ENSMUST00000014683|gb|BC120550|gb|BC137708	Mus musculus killer cell lectin-like receptor, subfamily A, member 5 (Klra5), mRNA [NM_008463]	GO:0005886(plasma membrane)|GO:0007155(cell adhesion)|GO:0016020(membrane)|GO:0016021(integral to membrane)|GO:0030246(carbohydrate binding)	GGACTGTTCTCTGGTATCTATTTTGACAGAACAGAGTTCATCTTCCTTCCTCTTGGAGAC	50.1209	26.1	51.6	63.7	47.1	46.9	109	89.8	31.3	12.7	111	32.1	36.8	79.2	78.2	94	0.606589	0.199372	0.402981	0.328677
A_30_P01017685			chr2:75447542-75448025_R	lincRNA:chr2:75447542-75448025 reverse strand		TCCCTGTTCTTTTGAAATCACAGCCTTAGTTTGTCCCTATTCGGCTTTGTTCCTGCACGT	30.1111	27.5	56	70.2	55	76.5	158	183	20.2	31.3	30.9	55.6	31	69.2	205	121	0.360714	0.445869	0.403292	1.23607
A_55_P2028894	Gata4	GATA binding protein 4	ref|NM_008092|ens|ENSMUST00000118022|gb|AK134639|gb|AB075549	Mus musculus GATA binding protein 4 (Gata4), mRNA [NM_008092]	GO:0000790(nuclear chromatin)|GO:0000977(RNA polymerase II regulatory region sequence-specific DNA binding)|GO:0000978(RNA polymerase II core promoter proximal region sequence-specific DNA binding)|GO:0000981(sequence-specific DNA binding RNA polymerase II transcription factor activity)|GO:0001076(RNA polymerase II transcription factor binding transcription factor activity)|GO:0001158(enhancer se…	TAGCTTCGAACCAAGATTCTGTTGTAATCATTTTCGCTGTTTCTCCCTCAAGGCCGCCTT	28.4415	22.2	51.8	59.9	47	66	138	158	28.2	15.8	53.7	35.8	42	47.7	152	113	0.544402	0.263773	0.404087	0.484519
A_30_P01019571			chr6:83367433-83370986_R	lincRNA:chr6:83367433-83370986 reverse strand		CCATAATTTACCCCAATGTCCTGTTTATAATGAATCACTTTTCACTAGGCCATAGAAAAG	27.1603	27.9	62.6	57.9	162	52.1	38.7	41.8	22.1	26.4	35.3	26.4	39.2	33	28	26.2	0.353035	0.455959	0.404497	1.29154
A_30_P01027129			chr13:94182877-94203852_F	lincRNA:chr13:94182877-94203852 forward strand		TGTAAGTTTTGAAGCTTTTCAAATATTTCTTTATCTAGCCAATGACTCTTTGGGTTAAAC	32.727	33.9	75.5	91.2	59.5	92.8	98	83.6	31.9	35.4	38.5	57.6	30.6	37	39.1	46.3	0.422517	0.388158	0.405337	0.918681
A_30_P01024993			chr1:167218236-167218418_F	lincRNA:chr1:167218236-167218418 forward strand		TTTAAATGGGTCATTTCCCACCAATCCTTAAGGGTGTGCTTTTCCTGGGCAGGCAGAATA	40.932	51.3	102	67.2	63.8	61.9	124	96.8	28.7	35.6	37.4	40.3	21.9	40.2	102	75.5	0.281373	0.529762	0.405567	1.88278
A_30_P01031231			chr16:11008534-11013759_F	lincRNA:chr16:11008534-11013759 forward strand		TTTCCCTTCCTTTCCAAGAACAGGCGTCAGGACTTGAGGACTACAGGGGACGCTCAGCAG	47.781	40.2	64.7	64.6	60.2	65.3	95.8	79.1	29.8	22.7	31.4	54.6	39.7	43.5	68.8	58.9	0.460587	0.351393	0.40599	0.762924
A_52_P151227			gb|AK085785|tc|TC1622090|riken|D830009C02|nap|NAP086901-1	Mus musculus 16 days neonate heart cDNA, RIKEN full-length enriched library, clone:D830009C02 product:unclassifiable, full insert sequence. [AK085785]		CAAAAGCCACTTTAAACGACTGATGATCATTTTTATTGCACCGCCCATTGCTCTTGAAAG	24.6502	22.3	109	119	147	149	185	139	56.4	35.1	124	106	112	105	235	229	0.517431	0.294958	0.406195	0.570043
A_30_P01019042			chr5:37051650-37110575_F	lincRNA:chr5:37051650-37110575 forward strand		ATATACCGTGAATAAATCATGGCATCAATGCCACATTTCTCCAGCTCTTGTCCCAGCCAG	76.8973	62.9	74.9	74.8	77.6	113	170	194	43.8	17.1	48.2	89.6	51.9	61.7	205	136	0.58478	0.22861	0.406695	0.390933
A_30_P01029546			chr6:126502067-126507755_F	lincRNA:chr6:126502067-126507755 forward strand		ACTAAATCCTGGAGATGAAGTTATTGAAAGGCAAAAGTCTTCCAGCTGAGGACTGGGCAC	12.5012	14.5	65.5	60.6	153	191	188	221	29.3	22.2	125	152	150	110	171	159	0.447328	0.366337	0.406832	0.818944
A_55_P2004727	Gm10353	predicted gene 10353	gb|AK133601|tc|TC1665046|riken|5330413D18	Mus musculus adult male pituitary gland cDNA, RIKEN full-length enriched library, clone:5330413D18 product:hypothetical protein, full insert sequence. [AK133601]		CTCGGTTATTTCCGTTGCAGCTCGACCCCGCCCCTGAGGGCGGTGAGGAGCCGGAATTAA	358.517	346	768	1070	467	572	372	391	346	392	648	636	351	380	361	399	0.450521	0.366355	0.408438	0.813181
A_55_P2384636			ens|ENSMUST00000172700|gb|AK015822|tc|TC1655720|riken|4930518C09	RIKEN cDNA 4930518C09 gene [Source:MGI Symbol;Acc:MGI:1922330] [ENSMUST00000172700]		CCTCCTGTACCAGTCAGCCTTACAAGTTCTGTTCTGCTTACTAAAGACTCTTAGTACTCT	27.9589	49.2	93.2	64.8	254	79.9	82.5	93.4	44.2	22.3	34.6	45.7	29.6	39.5	101	58.8	0.474249	0.344136	0.409192	0.725644
A_55_P1989337	Gm14124	predicted gene 14124	ref|NM_001142410|ens|ENSMUST00000109922	Mus musculus predicted gene 14124 (Gm14124), mRNA [NM_001142410]	GO:0003674(molecular_function)|GO:0005575(cellular_component)|GO:0008150(biological_process)|GO:0046872(metal ion binding)	TCTCCAGCTCCTCTAGGGCCTATAAATTTGACCTTAGGTTCATCTTATGATTAAATTGAT	42.9245	39.1	57.6	61.8	65.7	68.7	119	101	19.1	30.1	60.9	41.2	22.2	39.3	107	87.6	0.331597	0.487055	0.409326	1.46882
A_30_P01032744			chr13:62580825-62596425_F	lincRNA:chr13:62580825-62596425 forward strand		TTTATCACATTGAGTATATTCAGACGCTTTCTCTGCACTCTGACTTCTTTCATGCCTGAG	40.8507	34.6	68.2	88.2	65.8	67	162	153	40.7	19.6	40.5	68.5	57.7	74.7	159	109	0.596774	0.222222	0.409498	0.372372
A_55_P2028734	Klra16	killer cell lectin-like receptor, subfamily A, member 16	ref|NM_013794|ref|XM_003945717|ref|XM_003945718|ref|XM_003945719	Mus musculus killer cell lectin-like receptor, subfamily A, member 16 (Klra16), mRNA [NM_013794]	GO:0005886(plasma membrane)	CATCTTCCTTCCCTGTTGAGACTGGACAGATCTTCTCTGATACCCCAAAGCTTGGATAAA	143.035	108	133	138	142	163	184	198	54.1	56.9	75.8	116	78.2	116	219	172	0.406767	0.412319	0.409543	1.01365
A_66_P121583	Gm7120	predicted gene 7120	ref|NM_001039244|ens|ENSMUST00000178948|ref|XM_003945942|ref|XM_003945519	Mus musculus predicted gene 7120 (Gm7120), transcript variant 1, mRNA [NM_001039244]	GO:0003674(molecular_function)|GO:0005575(cellular_component)|GO:0008150(biological_process)	TTTATTTAGTTTTTACAGTTCCTGTGCCCTCTTGTCTGCGAGCATGCTCAGTACTTGCGT	1705.92	2210	8070	1940	1860	2570	1660	2150	1210	1300	1360	1800	1440	1680	1430	1430	0.149938	0.670103	0.410021	4.4692
A_55_P2097773	Msh4	mutS homolog 4 (E. coli)	ref|NM_031870|ref|NM_001282054|ens|ENSMUST00000005630|gb|BC138163	Mus musculus mutS homolog 4 (E. coli) (Msh4), transcript variant 1, mRNA [NM_031870]	GO:0000166(nucleotide binding)|GO:0000793(condensed chromosome)|GO:0000794(condensed nuclear chromosome)|GO:0000795(synaptonemal complex)|GO:0001541(ovarian follicle development)|GO:0003677(DNA binding)|GO:0005524(ATP binding)|GO:0005634(nucleus)|GO:0006200(ATP catabolic process)|GO:0006298(mismatch repair)|GO:0007126(meiosis)|GO:0007129(synapsis)|GO:0007131(reciprocal meiotic recombination)|GO:0…	ACGGTGTCCATGCTGGATATGCTGCTGTCGTTTGCGCATGCCTGTACTCTTTCTGACTAC	82.9743	78	50.8	90.1	61.5	104	91.9	169	26.4	27.2	57.1	95.8	65	98.9	118	110	0.519685	0.301887	0.410786	0.580903
A_30_P01031406			chr4:136856064-136877219_F	lincRNA:chr4:136856064-136877219 forward strand		AGGCCTTTCTGAAAAGGGGTAGAAAGAAGAAATGGGCAATCTGATTTTCAGTATCACAAC	74.7629	54.8	79.8	141	13	21.7	40.9	120	47.7	31.8	17.9	0.01	0.01	17.6	19.5	11.8	0.597744	0.225532	0.411638	0.377305
A_51_P128575	Scgb1a1	secretoglobin, family 1A, member 1 (uteroglobin)	ref|NM_011681|ens|ENSMUST00000025554|gb|X67702|gb|AK145844	Mus musculus secretoglobin, family 1A, member 1 (uteroglobin) (Scgb1a1), mRNA [NM_011681]	GO:0000122(negative regulation of transcription from RNA polymerase II promoter)|GO:0005576(extracellular region)|GO:0005615(extracellular space)|GO:0005622(intracellular)|GO:0005635(nuclear envelope)|GO:0005737(cytoplasm)|GO:0005783(endoplasmic reticulum)|GO:0005791(rough endoplasmic reticulum)|GO:0019834(phospholipase A2 inhibitor activity)|GO:0030141(secretory granule)|GO:0032689(negative regu…	TGAAGCTCACTGGATTTCAGAGATATTCTACTGCTAAAGCCTTGTCACTGCCCTGTGTCT	97.6197	86.7	104	113	152	154	243	314	50.9	38	115	118	129	159	301	264	0.489423	0.336283	0.412853	0.687101
A_30_P01032064			chr13:94187304-94188195_R	lincRNA:chr13:94187304-94188195 reverse strand		CAGAAGCAAGTATCTTATTTTAGCTGAACATCCCTTGATACATGACATTTAAAGTACTGC	26.6643	33.5	65.4	80.1	51.6	111	48.8	77.4	27.9	32.1	39.6	35.2	28.9	46.7	50.7	53	0.426606	0.400749	0.413677	0.93939
A_52_P289091	Cyp2b13	cytochrome P450, family 2, subfamily b, polypeptide 13	ref|NM_007813|ens|ENSMUST00000005669|gb|BC145895|tc|TC1586783	Mus musculus cytochrome P450, family 2, subfamily b, polypeptide 13 (Cyp2b13), mRNA [NM_007813]	GO:0004497(monooxygenase activity)|GO:0016491(oxidoreductase activity)|GO:0046872(metal ion binding)|GO:0055114(oxidation-reduction process)	AGAGCTGCTGGAAACTAGACTGTATGTTGCTGCTCACATCTTTCCTCCTATTGTGGTTCT	34.5949	45.9	64.2	89.9	78.9	83.6	134	134	38.5	20.5	50.7	77.1	51.4	58.7	130	96.2	0.599688	0.228031	0.41386	0.380249
A_51_P432403	Fgfr2	fibroblast growth factor receptor 2	ref|NM_010207|ref|NM_201601|ens|ENSMUST00000136264|ens|ENSMUST00000122054	Mus musculus fibroblast growth factor receptor 2 (Fgfr2), transcript variant 1, mRNA [NM_010207]	GO:0000122(negative regulation of transcription from RNA polymerase II promoter)|GO:0000166(nucleotide binding)|GO:0001525(angiogenesis)|GO:0001657(ureteric bud development)|GO:0001701(in utero embryonic development)|GO:0001837(epithelial to mesenchymal transition)|GO:0002053(positive regulation of mesenchymal cell proliferation)|GO:0003148(outflow tract septum morphogenesis)|GO:0003149(membranou…	CTGCCTCAGTATCCACACATAAACGGCAGTGTTAAAACATGAGTGAATGTGTCTTCCTGT	55.9951	65.3	192	103	115	142	203	129	57.4	54.7	80.7	113	97.8	126	82.3	121	0.298958	0.531068	0.415013	1.77639
A_30_P01018159			chr1:167218236-167218418_F	lincRNA:chr1:167218236-167218418 forward strand		GAACAGCAGCCGTGTCTGAAGATCTGGGAGTGACTTGGGATAGCCGAGATAGAAGGCATT	74.4874	133	118	117	22.7	99.2	64.2	115	41.9	55.7	29.6	36.9	40.8	54.3	63.4	57.6	0.355085	0.476068	0.415577	1.34072
A_30_P01032748			chrX:20570399-20571162_F	lincRNA:chrX:20570399-20571162 forward strand		TAATTTTTAGCAGTTGTATACAACAGAGGCAAATAGCCTTATAACACAAGGAAGAGAGGA	47.8989	52.5	53.4	85.5	50.3	83.3	50.4	80.2	21.9	36.1	55.1	56.1	46.6	59.1	40.5	31.1	0.410112	0.422222	0.416167	1.02953
A_30_P01023585			chr2:116796887-116797441_F	lincRNA:chr2:116796887-116797441 forward strand		GCTCCTCTGACTTTTTCTTTTCTATTCTTATTGTTTGGGTTTTTTGGTGGCAGCAAATGC	43.9363	61.1	92	324	94.4	115	143	140	68.3	29.4	52.7	78.4	57.9	87.1	171	114	0.742391	0.0907407	0.416566	0.122228
A_55_P2088315	Vmn1r87	vomeronasal 1 receptor 87	ref|NM_134227|ens|ENSMUST00000094827|tc|NP496238|nap|NAP057748-1	Mus musculus vomeronasal 1 receptor 87 (Vmn1r87), mRNA [NM_134227]	GO:0005550(pheromone binding)|GO:0005887(integral to plasma membrane)|GO:0007186(G-protein coupled receptor signaling pathway)|GO:0016503(pheromone receptor activity)|GO:0019236(response to pheromone)	CCCAACTGTCTGCCCTTATGTTCTGTTGAACAATAGGAAACTTATTTCCAAATTTATTTC	1121.22	1010	2980	1610	1440	1930	1110	1400	852	882	817	849	932	878	1210	974	0.285906	0.547826	0.416866	1.91611
A_55_P2058433	Cyp2c68	cytochrome P450, family 2, subfamily c, polypeptide 68	ref|NM_001039555|ref|NM_001104525|ref|NM_010004|ens|ENSMUST00000099472	Mus musculus cytochrome P450, family 2, subfamily c, polypeptide 68 (Cyp2c68), mRNA [NM_001039555]	GO:0003674(molecular_function)|GO:0004497(monooxygenase activity)|GO:0005575(cellular_component)|GO:0008150(biological_process)|GO:0016491(oxidoreductase activity)|GO:0046872(metal ion binding)|GO:0055114(oxidation-reduction process)	ACCCAGTCCCAGGAATTCCATCTATATTCCTTCTTATCACAGCTTCTGTTATCTAATTGC	23.3498	32	80.8	77.6	128	58.4	98.8	90.6	38.8	27.5	38.9	52.4	32.2	53.7	91	66.2	0.480198	0.354381	0.41729	0.73799
A_30_P01031937			chr7:119809687-119811410_R	lincRNA:chr7:119809687-119811410 reverse strand		TACTGGTACTGCTATTATAAGCTATTGCCTCTCAACCTTCATGACTGCCTTTGGAGGCTC	35.7138	29.7	63.2	66.5	181	42.3	143	130	33.6	20.4	29.3	42.8	47.6	55.1	142	82.1	0.531646	0.306767	0.419206	0.577014
A_55_P2070379	Hs6st3	heparan sulfate 6-O-sulfotransferase 3	ref|NM_015820|ens|ENSMUST00000065904|gb|BC118035|gb|BC117529	Mus musculus heparan sulfate 6-O-sulfotransferase 3 (Hs6st3), mRNA [NM_015820]	GO:0008146(sulfotransferase activity)|GO:0015015(heparan sulfate proteoglycan biosynthetic process, enzymatic modification)|GO:0016020(membrane)|GO:0016021(integral to membrane)|GO:0016740(transferase activity)|GO:0017095(heparan sulfate 6-O-sulfotransferase activity)	AACATTCGTCTGGAGCAGCCATGCAGCTGCAAAGCTGGCCAGAAAAAGTGCACCTGCCAC	35.289	28.5	65.3	210	61.2	36.1	39.4	53.5	41.2	43.7	34.7	33.4	22.7	25.4	43.1	18.1	0.630934	0.208095	0.419515	0.329821
A_30_P01027165			chr15:77575125-77585575_F	lincRNA:chr15:77575125-77585575 forward strand		TCACTCTGGGATGCCCCGTTTTCCTAGACTAATTGGCTCATATTCATTGAGCTAAAGTCT	42.628	192	68.9	141	76.5	68.9	77.1	79	38.2	40.2	35.1	48.6	28.8	48.3	65.1	73.7	0.554427	0.285106	0.419767	0.514236
A_30_P01029940			chr5:125078875-125098525_R	lincRNA:chr5:125078875-125098525 reverse strand		TCACACCTCTTTACCTCACCGACGAATTTTCTTTGAAAAGAACTTACATTTTGATTGAGC	79.1405	45.3	128	100	120	106	136	138	49.6	45.5	88.4	68.8	67.5	72.4	226	138	0.3875	0.455	0.42125	1.17419
A_30_P01023997			chr12:110967974-110969051_F	lincRNA:chr12:110967974-110969051 forward strand		ATTCAGGCTTGTGAAAGACAAGCTAACTTGACCCTGTTCCTTTGTTCTCACTGAGGTCCT	60.0451	22	57.8	54.4	105	87	149	203	26.1	21.3	147	74.6	74.1	71.2	264	165	0.451557	0.391544	0.421551	0.867098
A_52_P627269	Ces2b	carboxyesterase 2B	ref|NM_198171|ens|ENSMUST00000163042|gb|BC015286|gb|BC058815	Mus musculus carboxyesterase 2B (Ces2b), mRNA [NM_198171]	GO:0005575(cellular_component)|GO:0008150(biological_process)|GO:0016787(hydrolase activity)|GO:0052689(carboxylic ester hydrolase activity)	TTTTTGTTTGTTCCAACACTTACATAGCATTTGTCACCTCAGTCTTTGAGCTTTCCTGTG	48.4987	120	176	248	18.4	49.4	34.8	34.6	79.4	97.6	25.5	28.2	14.8	26.6	45	35.6	0.451136	0.393548	0.422342	0.872349
A_55_P2200009						ATCCTGGTCTCTCCTCTTTTAAGTCACACGTGGGAAAGTGGATAAATTATCCAAAGGATA	83.1123	54.2	113	97.5	130	83.9	139	154	56.5	33.8	71.8	60.3	82.6	84.7	120	120	0.5	0.346667	0.423333	0.693333
A_30_P01022433			chr18:54122285-54122917_F	lincRNA:chr18:54122285-54122917 forward strand		GTTATATTTCCTGTCTCTCAGCTTTTTCTTGTGTTCCGGTTGCCATCTGAAGGTCTCTCG	53.4171	67.3	86.2	121	126	137	233	197	36.8	50.9	72.2	109	104	135	244	176	0.426914	0.420661	0.423788	0.985353
A_55_P2076253			gb|DV659458|tc|TC1608315	DS178B_H12 Eppig [DV659458]		GTTCTCTTGCTGCGGATTGTAACTCAGTAAAATAAAACTCTAGAGGCTTGTGATTTATCA	38.6031	60.5	61	125	47	49.7	59.2	63.6	36.4	31.5	21.7	47.9	30.5	41.2	62.8	53	0.596721	0.252	0.424361	0.422308
A_52_P333825	Tas2r118	taste receptor, type 2, member 118	ref|NM_207022|ens|ENSMUST00000062463|gb|BC104401|gb|BC104400	Mus musculus taste receptor, type 2, member 118 (Tas2r118), mRNA [NM_207022]	GO:0001580(detection of chemical stimulus involved in sensory perception of bitter taste)|GO:0004871(signal transducer activity)|GO:0004930(G-protein coupled receptor activity)|GO:0005783(endoplasmic reticulum)|GO:0005802(trans-Golgi network)|GO:0007165(signal transduction)|GO:0007186(G-protein coupled receptor signaling pathway)|GO:0009897(external side of plasma membrane)|GO:0016020(membrane)|G…	AAATGATTGGCTTTGGTATTCCTTTCTTCGTGTTCCTGGCTTCTATCATCTTACTCACAG	44.3636	51.6	96.4	102	83.6	100	250	256	61.8	21.2	59.8	65.7	79.8	97.2	290	156	0.641079	0.207843	0.424461	0.324208
A_30_P01030365			chr13:75921214-75923024_F	lincRNA:chr13:75921214-75923024 forward strand		AATAAACATAGCTTGCCCAATAACTTCCTGCCATCTGTCTGACCATCCTTTCTTTCTGTG	107.353	73.1	153	180	168	303	297	331	64.3	77.2	105	114	146	156	371	273	0.420261	0.428889	0.424575	1.02053
A_55_P2143581	2610018G03Rik	RIKEN cDNA 2610018G03 gene	ref|NM_133729|ens|ENSMUST00000146956|gb|AK029278|gb|AK034609	Mus musculus RIKEN cDNA 2610018G03 gene (2610018G03Rik), mRNA [NM_133729]	GO:0000166(nucleotide binding)|GO:0000287(magnesium ion binding)|GO:0004672(protein kinase activity)|GO:0004674(protein serine/threonine kinase activity)|GO:0005524(ATP binding)|GO:0005737(cytoplasm)|GO:0005794(Golgi apparatus)|GO:0006468(protein phosphorylation)|GO:0006915(apoptotic process)|GO:0016020(membrane)|GO:0016301(kinase activity)|GO:0016310(phosphorylation)|GO:0016740(transferase activ…	CCCCCACACAAGTATATTCTAAAAATGACTATTTGTAATGAGGTGGAAGTAAGTAATACC	27.5254	60.8	136	79.8	88.1	137	76.2	67.6	41.4	43.5	54.9	72.8	81.2	80	111	96.2	0.304412	0.545113	0.424762	1.79071
A_30_P01028277			chr14:115423660-115463160_F	lincRNA:chr14:115423660-115463160 forward strand		CGAGGGGTGGGGACGGTCCCCCACGCCGCCCGTGCCTCTCCACGGAGCCCCGAGCTCGGA	2818	10600	9650	20700	10600	17000	8320	13200	3000	11200	8370	13400	8920	12700	7590	12500	0.310881	0.541063	0.425972	1.74042
A_55_P2097814	Olfr122	olfactory receptor 122	ref|NM_146288|ens|ENSMUST00000119082|gb|BC156657|tc|TC1599683	Mus musculus olfactory receptor 122 (Olfr122), mRNA [NM_146288]	GO:0004871(signal transducer activity)|GO:0004930(G-protein coupled receptor activity)|GO:0004984(olfactory receptor activity)|GO:0005886(plasma membrane)|GO:0007165(signal transduction)|GO:0007186(G-protein coupled receptor signaling pathway)|GO:0007608(sensory perception of smell)|GO:0016020(membrane)|GO:0016021(integral to membrane)|GO:0050896(response to stimulus)|GO:0050911(detection of chem…	AACGTCTGCCACCTATTTGAGGCCCAAATCTGATCACTCACCAGAAGTGGATAAACTCTT	174.968	90.9	339	209	318	241	360	424	135	94.9	107	83.7	123	137	572	370	0.39823	0.454067	0.426149	1.14021
A_55_P2076998	Csn1s2b	casein alpha s2-like B	ref|NM_009973|ens|ENSMUST00000072539|gb|AK142683|gb|AK164767	Mus musculus casein alpha s2-like B (Csn1s2b), mRNA [NM_009973]	GO:0005215(transporter activity)|GO:0005576(extracellular region)|GO:0006810(transport)	TTCACTTCTGCTCCCATGTCACTGAACCACATTCTTTTCAAAAAATAAAACTTCAAGTGC	31.7519	48.2	176	82.5	65.1	85	96.2	88.9	49.6	47.1	44.4	76.6	66.2	59	98.9	58.4	0.281818	0.570909	0.426364	2.02581
A_30_P01027162			chr12:52880692-52933444_R	lincRNA:chr12:52880692-52933444 reverse strand		GTGCAGTGAAGTTTTTGTAACTGCCTAATCTTACTTGTTACATAGGAAGATCCTATTTCA	85.7435	86.7	196	135	103	149	96.1	117	52.6	79.2	76.5	84.7	93	93.8	101	89.9	0.268367	0.586667	0.427517	2.18606
A_51_P351166	Myod1	myogenic differentiation 1	ref|NM_010866|ens|ENSMUST00000072514|gb|BC103613|gb|BC103618	Mus musculus myogenic differentiation 1 (Myod1), mRNA [NM_010866]	GO:0000381(regulation of alternative nuclear mRNA splicing, via spliceosome)|GO:0000790(nuclear chromatin)|GO:0001047(core promoter binding)|GO:0003677(DNA binding)|GO:0003700(sequence-specific DNA binding transcription factor activity)|GO:0003705(RNA polymerase II distal enhancer sequence-specific DNA binding transcription factor activity)|GO:0005515(protein binding)|GO:0005634(nucleus)|GO:00056…	TTTTGTTGTTGTTGTTGTAGTCCTTCAGTTGTTTGTTTGTTTTTTCATGCGGCTCACAGC	38.55	48.1	63.4	76.8	85.2	108	123	161	24.6	35.9	63.6	98.7	50	94.4	141	132	0.388013	0.467448	0.42773	1.20472
A_30_P01032644			chr9:56910620-56919495_F	lincRNA:chr9:56910620-56919495 forward strand		CCAAACTATACCTCTATCTCTTCCATAGTGGGCTTCTCATTCAGATTTTATTTGAACAGG	123.992	19.9	147	66.3	139	65.1	97.2	98	46	36	43.5	45	45.2	56.7	135	74.4	0.312925	0.542986	0.427956	1.7352
A_30_P01018688			chr5:111538420-111540142_F	lincRNA:chr5:111538420-111540142 forward strand		CATTAGAAAAATCTATTGGTCAACTTGGGTTGACAGTGTTGAAGGGGACTCAGGTATCCA	128.95	291	118	81.7	42.8	50.7	31.7	58.3	33.8	46.6	24.7	41	35.6	47.3	20.4	23.1	0.286441	0.570379	0.42841	1.99127
A_55_P2404658	Gm17501	predicted gene, 17501	ref|XR_106421|ref|XR_107563|gb|AK040843|gb|FJ422280	PREDICTED: Mus musculus predicted gene, 17501 (Gm17501), misc_RNA [XR_106421]		TCCTTGTTTTTCACGCAATCTGTCTATCATGATTTAAAATAAAGTTGCAGTGGATGATCC	52.0585	43.9	62.7	133	79.3	108	81.7	114	26.9	57	72.9	118	86.7	105	91.7	84.4	0.429027	0.428571	0.428799	0.998938
A_30_P01021869			chr4:55981894-55986587_F	lincRNA:chr4:55981894-55986587 forward strand		CATGTTCCTTCTTGAATGCTATCTCTCCCCACGGTTTCCCATGAGGTCACTGAGTCGTAG	75.0788	104	240	180	169	165	282	271	106	74.9	157	177	149	161	277	192	0.441667	0.416111	0.428889	0.942138
A_30_P01030861			chr1:173250734-173259306_F	lincRNA:chr1:173250734-173259306 forward strand		ACACCTCTGTTTAGACCCTTCAAAGCCTCTTCGACTGCCCTTAGGATAAAATAAATTTGC	110.72	52	299	324	274	287	491	453	165	99.6	316	273	317	284	501	335	0.551839	0.307407	0.429623	0.557059
A_30_P01022472			chr19:53517903-53540753_R	lincRNA:chr19:53517903-53540753 reverse strand		TCTGAACATCATTGTCACTGATCCCTGTTGATCCCTGTAGCCTTTTATGTCAGCTCTTCC	51.9188	53.4	77.4	86.2	70.9	94.2	148	128	43.1	26.1	49.7	47.5	63.5	66.4	178	98.9	0.556848	0.302784	0.429816	0.543747
A_30_P01017894			chr2:155269145-155303251_F	lincRNA:chr2:155269145-155303251 forward strand		TTAAGTTGCTAGAGGTTCTCTCCTTTCCTAACCAGTTCCACTCTGTACCTTCTGCTGTCT	87.8295	108	127	178	188	199	300	345	75.6	47.1	118	138	157	195	377	291	0.595276	0.264607	0.429941	0.444511
A_30_P01022608			chr18:78190463-78235438_F	lincRNA:chr18:78190463-78235438 forward strand		AAGAGAGGCTTGCTTTCAGTGGTTTGAGGTCATTTATATCGGAGATCAGTAGTGTGGCGT	37.2027	63.9	64.2	110	76.4	125	74.1	97.2	32.3	39.4	58.3	83.1	76.7	94	57.7	70.2	0.503115	0.358182	0.430649	0.711928
A_30_P01032848			chrX:31867450-32124664_F	lincRNA:chrX:31867450-32124664 forward strand		TAAAATACATTATCTACAGCTTAGCCAAATCTGAAGTCTTCCTTACTATGGATGGGTGGT	83.1371	178	278	369	722	1090	997	1350	125	152	581	807	1020	677	930	919	0.44964	0.411924	0.430782	0.916119
A_55_P2140121	Gm5129	predicted gene 5129	ref|NR_028426|tc|TC1711622	Mus musculus predicted gene 5129 (Gm5129), long non-coding RNA [NR_028426]		GACATCAGATCCCACAATAAGCTCCTGTCTCAATAAATCAATAAGCTCCTGTATAAATAA	29.1689	20	76.5	167	59.5	61.4	90.9	110	50.7	33.6	53.1	40.2	61.4	57.4	81.4	54.1	0.662745	0.201198	0.431971	0.303582
A_51_P286073	LOC101055743	uncharacterized LOC101055743	ref|XM_003945465|ref|XM_003945861|gb|AK015500|tc|TC1595568	PREDICTED: Mus musculus uncharacterized LOC101055743 (LOC101055743), mRNA [XM_003945465]		GCAAGAAATCCATTTGCATAAGAGACCAGAAATAAGCCACCTTACAGAGGGAGATGCTCA	28.8649	59.1	50.5	78.6	57.8	72.8	94.6	117	32.7	17.1	42.2	47	46.8	88.2	131	39.1	0.647525	0.217557	0.432541	0.335983
A_30_P01026579			chr8:26212577-26218527_R	lincRNA:chr8:26212577-26218527 reverse strand		GTTACCACGGGTGCACATTAAATTGGTTAAAATGGTGTCATGTCTGGTATATGTATTTTT	56.6272	74	71.8	101	85.8	93.6	143	173	28	48	42.1	51.8	44.8	32.2	199	159	0.389972	0.475248	0.43261	1.21867
A_51_P163476	5430403G16Rik	RIKEN cDNA 5430403G16 gene	gb|AK019943|ens|ENSMUST00000092720|tc|TC1617898|riken|5430403G16	Mus musculus 6 days neonate head cDNA, RIKEN full-length enriched library, clone:5430403G16 product:weakly similar to zinc finger protein ZNF126 (fragment) [Homo sapiens], full insert sequence. [AK019943]	GO:0003674(molecular_function)|GO:0005575(cellular_component)|GO:0008150(biological_process)|GO:0046872(metal ion binding)	AGCCCTATGAATGTAATCAATGTTGTTAACGCTTTGTACAACACAGTCATCTCACGATGC	149.018	270	93	131	109	171	103	136	61.2	27.4	80	125	114	127	116	120	0.658065	0.20916	0.433612	0.317842
A_52_P235358	Pigl	phosphatidylinositol glycan anchor biosynthesis, class L	ref|NM_001039536|ens|ENSMUST00000014389|gb|AK128932|gb|AK158149	Mus musculus phosphatidylinositol glycan anchor biosynthesis, class L (Pigl), mRNA [NM_001039536]	GO:0000225(N-acetylglucosaminylphosphatidylinositol deacetylase activity)|GO:0005575(cellular_component)|GO:0005783(endoplasmic reticulum)|GO:0006506(GPI anchor biosynthetic process)|GO:0016020(membrane)|GO:0016021(integral to membrane)|GO:0016787(hydrolase activity)	TCTTTACCACAAATGTGTGTAAATGTGCCATAGAACTAGTTCACAGGTGTGATGTTTACA	26.2635	41.1	63.6	162	65.1	73.4	50.2	64	42.4	32.5	35.9	61.7	32	43.5	24.2	29.4	0.666667	0.200617	0.433642	0.300926
A_30_P01018597			chrX:121493684-121500532_F	lincRNA:chrX:121493684-121500532 forward strand		GATTACAACAGATCCTTTGCCTCTTATAGGGTCTATGGGACCTCCCAAATCTAAAACTAA	73.2929	104	112	86	81.8	105	69.3	74.7	28.7	52.6	48.2	57.6	90.9	62.7	75.4	69.5	0.25625	0.611628	0.433939	2.38684
A_30_P01032559			chr4:11049325-11072075_R	lincRNA:chr4:11049325-11072075 reverse strand		ATAAAGATTCATAAGGTGGGATTATGGCAAGGGTCCGTGTGGCTTGGCATTGTGCGAAAT	51.2516	45.7	94.5	79.5	67.9	81.5	126	114	47.7	28.9	35.4	61.2	33.8	66.3	133	105	0.504762	0.363522	0.434142	0.720185
A_30_P01028483			chr5:26323150-26357875_F	lincRNA:chr5:26323150-26357875 forward strand		TCCTTCTCCTTTAATTTCAGTTCTTTATAATGTCGAGTTTGCCTGTGGTAGGGCCTGGCC	80.669	70.2	87.3	88.9	77.8	148	181	204	37.7	38.8	53.1	103	82.4	98.9	170	160	0.431844	0.436445	0.434145	1.01065
A_30_P01018500			chr13:94183152-94184073_F	lincRNA:chr13:94183152-94184073 forward strand		CCAGTTACCAAATATATACAGTGCCTGTAAAACTCCACAATTATTAGAGTATGAACTCTG	34.4723	47.4	64.3	68.2	46.6	78.6	57.3	67.2	31.8	25.6	47.8	62.3	28.9	41.5	43.9	45.5	0.494557	0.375367	0.434962	0.758996
A_30_P01021296			chr18:84735774-84760824_R	lincRNA:chr18:84735774-84760824 reverse strand		TGGGATGGTAGCTCACTTGGAAACAAGATACTGCTTAGAAAATACTCGAACTCCTGCTAG	59.0668	106	187	107	56.6	82.1	86.7	119	50.5	64.4	71.3	75.3	77.1	99.9	80.1	75.5	0.270053	0.601869	0.435961	2.2287
A_55_P2033362	Egr2	early growth response 2	ref|NM_010118|ens|ENSMUST00000048289|ens|ENSMUST00000105438|gb|AK153882	Mus musculus early growth response 2 (Egr2), mRNA [NM_010118]	GO:0001102(RNA polymerase II activating transcription factor binding)|GO:0003676(nucleic acid binding)|GO:0003677(DNA binding)|GO:0003682(chromatin binding)|GO:0003700(sequence-specific DNA binding transcription factor activity)|GO:0005515(protein binding)|GO:0005634(nucleus)|GO:0005737(cytoplasm)|GO:0006351(transcription, DNA-dependent)|GO:0006355(regulation of transcription, DNA-dependent)|GO:0…	CCGCTGATTTGTTTGGTTATTAGCTCTTAATAGTTGTGGAGAGAGAAACAATCTATTCTA	509.104	709	2470	3090	2480	3220	2080	2560	987	1460	1760	2280	1140	1260	2650	2210	0.399595	0.472492	0.436044	1.18243
A_55_P2384521	Ankrd33b	ankyrin repeat domain 33B	gb|AK053456|gb|BB539505|tc|TC1641620|riken|E130019F23	Mus musculus 0 day neonate eyeball cDNA, RIKEN full-length enriched library, clone:E130019F23 product:unclassifiable, full insert sequence. [AK053456]	GO:0003674(molecular_function)|GO:0003677(DNA binding)|GO:0005575(cellular_component)|GO:0008150(biological_process)	GCCTCTTGAGCATATCCTTCTTGCATGCACCACCACAATTGACTTAAAATATTTTAAAAA	12.9565	3.27	148	119	159	213	166	189	58	57.3	169	156	161	141	161	128	0.391892	0.481513	0.436702	1.22869
A_52_P232802	Tbx15	T-box 15	ref|NM_009323|ens|ENSMUST00000029462|gb|AK132578|gb|AK137458	Mus musculus T-box 15 (Tbx15), mRNA [NM_009323]	GO:0000122(negative regulation of transcription from RNA polymerase II promoter)|GO:0000976(transcription regulatory region sequence-specific DNA binding)|GO:0001106(RNA polymerase II transcription corepressor activity)|GO:0003677(DNA binding)|GO:0003700(sequence-specific DNA binding transcription factor activity)|GO:0005634(nucleus)|GO:0006351(transcription, DNA-dependent)|GO:0006355(regulation …	AAGTGAAACTGGGTGCAAGCTAAAATTTTTAAATGGTGTGGAGACTCGAATGATACCAAG	77.1847	94.7	195	101	44.5	87.6	65.2	88	49.1	62.8	39.2	60.3	143	156	39.3	45.1	0.251795	0.621782	0.436789	2.4694
A_55_P2289829	1700001D01Rik	RIKEN cDNA 1700001D01 gene	gb|AK143941|riken|F530003L12	Mus musculus adult male kidney cDNA, RIKEN full-length enriched library, clone:F530003L12 product:hypothetical protein, full insert sequence. [AK143941]		CACACACCATAAAATTGTTTTGTTACTGCTTCATAACTGTAACTTTCCTACCGTTATGGA	38.4098	54.7	55	96.9	45.6	50.5	36.8	40	29.4	33.3	28.9	23.7	14.9	39.8	42.9	28.7	0.534545	0.343653	0.439099	0.642889
A_51_P298615	Lhx8	LIM homeobox protein 8	ref|NM_010713|ens|ENSMUST00000177846|gb|D49658|gb|AK160121	Mus musculus LIM homeobox protein 8 (Lhx8), mRNA [NM_010713]	GO:0003677(DNA binding)|GO:0003700(sequence-specific DNA binding transcription factor activity)|GO:0005634(nucleus)|GO:0006351(transcription, DNA-dependent)|GO:0006355(regulation of transcription, DNA-dependent)|GO:0007611(learning or memory)|GO:0008270(zinc ion binding)|GO:0008585(female gonad development)|GO:0021879(forebrain neuron differentiation)|GO:0021884(forebrain neuron development)|GO:0…	GTGAATTTGCAACTGAAATTTATTTTGCCAGTGTTTTCGGGACAAGCTGAAGGCACGTCC	45.1422	81.5	345	476	450	628	211	275	139	227	96.7	97.6	148	176	290	242	0.402899	0.476891	0.439895	1.18365
A_55_P2006629			tc|TC1627912	Q91Y10_MOUSE (Q91Y10) Protocadherin alpha C1, complete [TC1627912]		AGCTTGCAATGCAAGCAGGCGGAACAGCTCGTGCGTTTTCCAGTCTCCTCTCCAGGAGTT	103.697	115	195	198	219	243	190	178	88.3	85.1	155	173	161	152	218	116	0.452821	0.429798	0.441309	0.949157
A_30_P01030204			chr14:73729977-73751877_F	lincRNA:chr14:73729977-73751877 forward strand		ATGAAGGCACTTCCACACCCTGGGTGGAACAGAGGAGCCCTGTAAAGTCCAGACACTCCA	35.1428	26.8	78.9	80.4	13.7	47	43.3	56.9	48	22.1	33	24.2	18.6	32.7	52.6	22.7	0.608365	0.274876	0.44162	0.451827
A_30_P01019238			chr18:90750100-90772025_R	lincRNA:chr18:90750100-90772025 reverse strand		TAAAAGGAATCACTGCTGGCATTTCTTTTCCTAATAACCCCTAACTGCTAACCCTCTAAC	36.5762	60.6	70.4	73.7	47.4	70.5	105	106	28.7	35.2	38.2	34.4	107	67.7	89.2	69.9	0.40767	0.477612	0.442641	1.17156
A_52_P427240	Ltn1	listerin E3 ubiquitin protein ligase 1	ref|NM_001081068|ens|ENSMUST00000039449|gb|AK052360|gb|BC027795	Mus musculus listerin E3 ubiquitin protein ligase 1 (Ltn1), mRNA [NM_001081068]	GO:0004842(ubiquitin-protein ligase activity)|GO:0005575(cellular_component)|GO:0008219(cell death)|GO:0008270(zinc ion binding)|GO:0016874(ligase activity)|GO:0046872(metal ion binding)|GO:0051865(protein autoubiquitination)	TTACTGCTTACCATCAACTAGTCAAAATGACTGTTATTGAAATAGTCTGAAAGTGGACAG	511.258	766	479	693	540	716	459	615	347	113	414	561	528	533	469	407	0.724426	0.163059	0.443743	0.225087
A_55_P2146789						TTGACTCTAACCATTTTATGGAGCTGGCTCTTTCTCTTCCTCCTGTCAGTAACTGCAGGT	197.473	215	276	361	371	453	532	614	139	140	299	354	324	366	559	473	0.503623	0.387812	0.445717	0.770043
A_51_P417815	Mrgpra3	MAS-related GPR, member A3	ref|NM_153067|ens|ENSMUST00000176369|gb|AY042193|tc|TC1596770	Mus musculus MAS-related GPR, member A3 (Mrgpra3), mRNA [NM_153067]	GO:0003674(molecular_function)|GO:0004871(signal transducer activity)|GO:0004930(G-protein coupled receptor activity)|GO:0005575(cellular_component)|GO:0005886(plasma membrane)|GO:0006953(acute-phase response)|GO:0007165(signal transduction)|GO:0007186(G-protein coupled receptor signaling pathway)|GO:0007635(chemosensory behavior)|GO:0016020(membrane)|GO:0016021(integral to membrane)	CTTCCAAAGCTCTCCACTGACTTAGTATTTATACCTCTCCCAAACAATAGCATTATTCAA	41.7929	47.3	69.3	57.1	49.1	57.1	85.2	68.7	23.3	31.8	34	29.1	37.9	36.3	78.5	48.2	0.336219	0.556918	0.446569	1.65641
A_30_P01030941			chr14:33901152-33976129_R	lincRNA:chr14:33901152-33976129 reverse strand		AACCAGTTGCTGGAGATGCTGTTTGGTGTAATATCTTCCTCCCAACTTCATCTGACCTCT	69.1987	72.4	152	178	196	220	143	149	64.6	83.5	148	150	171	163	245	182	0.425	0.469101	0.447051	1.10377
A_30_P01019612			chr6:86776350-86799450_F	lincRNA:chr6:86776350-86799450 forward strand		ATTGTAGTCCAGATGCCAGATTACCCCGAACTACTCTTCCCAGGGTGCTCAGCGGCAGGA	81.7889	138	163	103	107	153	191	222	66.2	50.3	74	96.7	114	114	185	150	0.406135	0.48835	0.447242	1.20243
A_30_P01029412			chr15:92667158-93020682_R	lincRNA:chr15:92667158-93020682 reverse strand		GTCAAGGTCTTCCATCTGGAACCTACTCACATCCTCTTTGTGTTCCTTGTATTATTATTT	149.675	342	512	689	859	1100	1300	1800	213	330	928	1190	769	808	1240	1250	0.416016	0.478955	0.447485	1.15129
A_30_P01021321			chr1:94077221-94091396_F	lincRNA:chr1:94077221-94091396 forward strand		GTGTTATCTCTTCCTTCAGTACCAGCTTATTGGGCATTTTCTCCCCACACTGGTTTAATA	65.0965	57.6	67	158	76.2	108	189	176	45.4	34.4	55.5	59.5	68.4	70	160	133	0.677612	0.217722	0.447667	0.321307
A_51_P169255	Olfr190	olfactory receptor 190	ref|NM_146397|ref|NM_207549|ens|ENSMUST00000071243|gb|BC104050	Mus musculus olfactory receptor 190 (Olfr190), mRNA [NM_146397]	GO:0004871(signal transducer activity)|GO:0004930(G-protein coupled receptor activity)|GO:0004984(olfactory receptor activity)|GO:0005886(plasma membrane)|GO:0007165(signal transduction)|GO:0007186(G-protein coupled receptor signaling pathway)|GO:0007608(sensory perception of smell)|GO:0016020(membrane)|GO:0016021(integral to membrane)|GO:0050896(response to stimulus)|GO:0050911(detection of chem…	CAGGTGCCCTTGTTCTTGTTTTTTCTGGTGATCTATCTCATTACTATTGTAGGGAACCTT	75.01	87.3	62.2	96.1	61.9	88.2	107	124	28.2	42.5	52.4	76	39.2	80.4	137	117	0.453376	0.442248	0.447812	0.975454
A_51_P471659	Alox12e	arachidonate lipoxygenase, epidermal	ref|NM_145684|ens|ENSMUST00000019051|gb|AK138743|gb|X99252	Mus musculus arachidonate lipoxygenase, epidermal (Alox12e), mRNA [NM_145684]	GO:0004052(arachidonate 12-lipoxygenase activity)|GO:0005506(iron ion binding)|GO:0005737(cytoplasm)|GO:0006629(lipid metabolic process)|GO:0006631(fatty acid metabolic process)|GO:0016491(oxidoreductase activity)|GO:0016702(oxidoreductase activity, acting on single donors with incorporation of molecular oxygen, incorporation of two atoms of oxygen)|GO:0019369(arachidonic acid metabolic process)|…	CAACTCTATGATATGTGCTTGTTTAGTCTTGAATCCCTAGTACCCACTTCTCTTCCCCAA	140.463	74.1	255	181	122	118	241	182	82	104	88.8	66.4	75	93	226	195	0.321569	0.574586	0.448077	1.78682
A_55_P2173199	Vmn2r4	vomeronasal 2, receptor 4	ref|NM_001104615|ref|NM_001104619|ref|NM_175674|ens|ENSMUST00000175724	Mus musculus vomeronasal 2, receptor 4 (Vmn2r4), mRNA [NM_001104615]	GO:0003674(molecular_function)|GO:0004871(signal transducer activity)|GO:0004930(G-protein coupled receptor activity)|GO:0005575(cellular_component)|GO:0005886(plasma membrane)|GO:0007165(signal transduction)|GO:0007186(G-protein coupled receptor signaling pathway)|GO:0008150(biological_process)|GO:0016020(membrane)|GO:0016021(integral to membrane)	TCCATTTTTGGGTTTGATGTTCTTCTGGCTCTGCTGTGTTTTGCTACCACCTTTGTGGCT	69.4871	115	130	167	175	205	320	233	57.8	75.6	107	125	146	180	301	317	0.444615	0.452695	0.448655	1.01817
A_51_P492893	Foxp4	forkhead box P4	ref|NM_028767|ref|NM_001110824|ref|NM_001110825|ens|ENSMUST00000113265	Mus musculus forkhead box P4 (Foxp4), transcript variant 3, mRNA [NM_028767]	GO:0000122(negative regulation of transcription from RNA polymerase II promoter)|GO:0003677(DNA binding)|GO:0003700(sequence-specific DNA binding transcription factor activity)|GO:0005634(nucleus)|GO:0006351(transcription, DNA-dependent)|GO:0006355(regulation of transcription, DNA-dependent)|GO:0007507(heart development)|GO:0042803(protein homodimerization activity)|GO:0043565(sequence-specific D…	TTCCCTCCTTCACTTAAGTTATTGTGTTAAACCAAAGTTTACAGTGTCTGTTGGTAGCAA	50.8198	107	88.3	102	98.1	117	129	145	44.8	39.8	80.9	109	79.2	94.6	132	107	0.507361	0.390196	0.448779	0.76907
A_55_P2030220						GAAGAGACCATTGGATGCAGAGTCAGCAGTGTCAGGGTACCTCGGCAAGCCGACTTCTAG	28.7846	17	71.3	69	17.4	26.8	23.5	20.9	51.7	12.1	21.1	14.4	0.01	15.3	27.3	9.21	0.725105	0.175362	0.450234	0.241844
A_30_P01024861			chr10:81325975-81352275_R	lincRNA:chr10:81325975-81352275 reverse strand		CTCTCCTCACAGCTCCTAGCAGCTGGTCTCAGCACGGAACCCGGAACCACCAAAGCCTCC	62.3296	47	111	124	71.2	75.9	100	91.5	46.7	59.5	161	128	50.5	47.1	101	68.6	0.420721	0.479839	0.45028	1.14052
A_55_P2377693	2310068J16Rik	RIKEN cDNA 2310068J16 gene	ref|NR_028124|gb|AK010113|tc|TC1594103|riken|2310068J16	Mus musculus RIKEN cDNA 2310068J16 gene (2310068J16Rik), long non-coding RNA [NR_028124]		CGTCCGCTGTGATGCTTAATGCTCTACTAAAAATAATTAGCCTAGATCTCTTCTTTATTA	65.6316	72.5	113	121	61.6	74.3	92.5	59.7	47.1	58.9	44.8	43.8	61.1	79.5	70.7	82.2	0.416814	0.486777	0.451796	1.16785
A_55_P2142934			ens|ENSMUST00000103657|gb|DQ186679|tc|TC1694095|nap|NAP113330-1	T cell receptor alpha variable 12-3 [Source:MGI Symbol;Acc:MGI:3648633] [ENSMUST00000103657]		TTTCCTTTTCTGGTATGTGCAACATCTCAATGAATCCCCTCGGCTACTCCTGAAGAGCTT	54.2866	48.7	88.9	92.1	113	144	159	209	50.5	31	96.7	124	125	104	231	184	0.568054	0.336591	0.452322	0.592533
A_51_P506961	Cldn9	claudin 9	ref|NM_020293|ens|ENSMUST00000085989|gb|BC058186|tc|TC1584801	Mus musculus claudin 9 (Cldn9), mRNA [NM_020293]	GO:0005198(structural molecule activity)|GO:0005886(plasma membrane)|GO:0005923(tight junction)|GO:0016020(membrane)|GO:0016021(integral to membrane)|GO:0030054(cell junction)	TTTGGTGCTCATCCCTGTCTGCTGGACAGCCCATGCCATCATCCAGGATTTTTATAACCC	114.983	163	348	253	163	253	203	190	138	129	170	206	173	202	239	192	0.396552	0.509881	0.453217	1.28579
A_55_P2329938	1700030L20Rik	RIKEN cDNA 1700030L20 gene	ref|NR_040592|gb|AK006559|tc|TC1717152|riken|1700030L20	Mus musculus RIKEN cDNA 1700030L20 gene (1700030L20Rik), long non-coding RNA [NR_040592]		GGTAGTTATCCCTGAATCTAATGATCTAATGTCATCCAAGTTGTCTTCCTTCCTAAATTT	16.2731	11.3	55.7	55.1	86.9	123	173	204	32.1	18.2	80.8	102	99.6	74	145	118	0.576302	0.330309	0.453305	0.573152
A_30_P01021908			chr4:59306575-59317850_R	lincRNA:chr4:59306575-59317850 reverse strand		CGTCTCTTATGTGGGCTGCCATTTTACTCCCTCGTTTCATTAAAAATAGCTTTTTTAAAA	43.1589	56.3	74.2	131	65.9	87.6	118	102	35.4	56.3	60.1	87.7	94.8	66.6	102	64.3	0.477089	0.429771	0.45343	0.900819
A_30_P01019842			chr3:84609788-84618062_R	lincRNA:chr3:84609788-84618062 reverse strand		CTCATAGACAGTTATAAGAAGTTGTTTTCCCACCAGAGCTTTTGAATTTCATTTCCTTGG	43.1353	56.6	50.7	87.9	61.4	76.9	110	96	33.7	21.4	47.9	57.6	62.4	65.1	79.5	61.3	0.664694	0.243458	0.454076	0.366271
A_52_P507578	Slamf6	SLAM family member 6	ref|NM_030710|ens|ENSMUST00000171330|gb|AK041936|gb|AF248635	Mus musculus SLAM family member 6 (Slamf6), mRNA [NM_030710]	GO:0004872(receptor activity)|GO:0005886(plasma membrane)|GO:0005887(integral to plasma membrane)|GO:0016020(membrane)|GO:0016021(integral to membrane)	CTGTTTGACCTCTGTGACCTTTTAGCTCCTCTATCAGAGAAGAAATTTCTCCATAGTATA	46.8668	106	138	97.3	75.9	98	111	125	46.8	55.5	64.9	86.5	104	111	127	67.5	0.33913	0.570401	0.454766	1.68195
A_30_P01022073			chr6:83367433-83370986_R	lincRNA:chr6:83367433-83370986 reverse strand		CTGCTTTTCCCTTGGTTTTTTAAGGGTTTCCGTGAATATCTAATATCCCGTTGTGTTGTC	46.453	38.8	53.9	72.7	64.5	74.4	113	88.5	17.6	42.5	52.2	58.2	52.6	39.7	70.2	88.2	0.326531	0.584594	0.455562	1.79032
A_30_P01031139			chr11:33414450-33450750_R	lincRNA:chr11:33414450-33450750 reverse strand		TTTTTGTACCCTCGCTCGTGAGTTCAGTGTGGATTCTTTGCTTCTGTCCTCTTTACTGCA	49.9474	100	106	138	111	153	347	381	48	63.3	91.5	92.7	104	144	389	267	0.45283	0.458696	0.455763	1.01295
A_30_P01028092			chr5:52584616-52595441_R	lincRNA:chr5:52584616-52595441 reverse strand		TAAAAGTGTGAGTAGCAGTTCATGAATTGTTAGCTCAGCCTCTCGTCCATCTCTGGGGAT	79.0396	59.1	89.8	74.8	151	152	252	282	62.1	16.5	96.6	116	108	103	343	260	0.691537	0.220588	0.456062	0.318983
A_30_P01026677			chr5:26333765-26338143_F	lincRNA:chr5:26333765-26338143 forward strand		CCACAGTCTTCCTATGTATAGAGGCATACACAGGTATTTATCCTGATCTGCACACATGTG	100.738	186	285	350	578	822	560	921	91.6	207	356	568	530	563	686	497	0.321404	0.591429	0.456416	1.84014
A_55_P2039530	Gm10724	predicted gene 10724	ref|XR_142006|ref|XR_140541|gb|AK135602|tc|TC1721917	PREDICTED: Mus musculus predicted gene 10724 (Gm10724), misc_RNA [XR_142006]	GO:0003674(molecular_function)|GO:0005575(cellular_component)|GO:0008150(biological_process)	TTATAGACACAGTGTGCCTTGTTTCTCTTTTCAGCACTTGCATCCATGTCTTCAGGAGGG	71.7276	111	101	150	107	138	171	169	62.9	43.7	85	118	106	137	165	131	0.622772	0.291333	0.457053	0.467801
A_30_P01024314			chr5:22056218-22206995_F	lincRNA:chr5:22056218-22206995 forward strand		AACTACTTTATGAGCATAATTCCTTGGACCATAATCGTCACCTGAGGAAGCCGCGTGAGA	52.647	51	172	76.2	74.2	96.5	84.5	336	53.7	45.9	64	50.7	75	62.5	74.5	60.9	0.312209	0.602362	0.457286	1.92935
A_55_P2064063	Casp14	caspase 14	ref|NM_009809|ens|ENSMUST00000005488|gb|AF092997|gb|AK081645	Mus musculus caspase 14 (Casp14), mRNA [NM_009809]	GO:0004197(cysteine-type endopeptidase activity)|GO:0005634(nucleus)|GO:0005737(cytoplasm)|GO:0006508(proteolysis)|GO:0006915(apoptotic process)|GO:0008233(peptidase activity)|GO:0008234(cysteine-type peptidase activity)|GO:0016787(hydrolase activity)|GO:0030154(cell differentiation)|GO:0045095(keratin filament)	CTGCCTCTTGCACAATGAAATGCTATAATTACTTTCGATTGGTGTAATGAGAATTCAGTA	153.57	169	181	240	195	222	270	207	101	85.6	112	164	132	147	131	105	0.558011	0.356667	0.457339	0.639175
A_30_P01029818			chr12:109994730-109995062_R	lincRNA:chr12:109994730-109995062 reverse strand		TTTCATGTTTGCCTTGGACATGGTTTGCACCTTCTGTTTGTCTGCATCTGCCGATTTGAC	87.165	75.2	137	60.7	103	118	216	276	41.9	37	63.1	72.8	81.7	76.9	257	167	0.305839	0.609555	0.457697	1.99306
A_55_P1964252						ATCTGGTGCCAGAGACAACACGAAGGAAGGATGCCACACTCTGCATCCCTGCAGCCACTT	81.0478	36.3	102	64	46.2	67.3	54.9	46.2	47.3	29.2	36.9	45.5	40.9	37	44.6	37.9	0.463725	0.45625	0.459988	0.983879
A_30_P01018653			chr5:26323150-26357875_F	lincRNA:chr5:26323150-26357875 forward strand		TGATTGTTCTCTCGGGCCTCCATGTTCTTCATCTCTAAGTCGTGTAGATATGTCATTATC	130.603	153	221	306	254	366	511	419	89.3	158	209	203	241	229	468	392	0.404072	0.51634	0.460206	1.27784
A_30_P01022014			chr19:58222540-58223077_F	lincRNA:chr19:58222540-58223077 forward strand		TGTCTGTTGTTCTGTTTGTTCTTACTTCATTCCTTTGCTGTCCCCACAGGGCAAGTTCTT	93.3135	109	76.2	89	122	156	227	257	43	31.7	72.3	78.1	63.6	120	262	213	0.564304	0.35618	0.460242	0.631184
A_30_P01029507			chr13:94182877-94203852_F	lincRNA:chr13:94182877-94203852 forward strand		GTGTGATTTTGTGAAGTAAAAATCTTTTCTTGAGGATTAAGAAGCCAATGCTAGAGATGG	45.7963	93.6	108	124	84.6	112	78.9	98.5	51.3	55.3	33.6	73.2	56.6	84.4	33.7	52.8	0.475	0.445968	0.460484	0.938879
A_55_P2201733	4930571K23Rik	RIKEN cDNA 4930571K23 gene	ref|NM_001145759|ens|ENSMUST00000166958|gb|AK016274|gb|BC048566	Mus musculus RIKEN cDNA 4930571K23 gene (4930571K23Rik), mRNA [NM_001145759]	GO:0003674(molecular_function)|GO:0005575(cellular_component)|GO:0008150(biological_process)	TCCACTGGGCACCAGAAGGAAAGTGGAGGGGGCACCAAGCACAATAAATGGTATCTGGAG	38.0574	17.4	94.6	53.7	6.07	39.7	41.3	31.3	38.9	27.4	22.5	12.8	23.4	36.3	28.6	25.9	0.411205	0.510242	0.460724	1.24085
A_55_P2130144	Lingo1	leucine rich repeat and Ig domain containing 1	ref|NM_181074|ens|ENSMUST00000053568|ens|ENSMUST00000114247|gb|AK027262	Mus musculus leucine rich repeat and Ig domain containing 1 (Lingo1), mRNA [NM_181074]	GO:0005154(epidermal growth factor receptor binding)|GO:0005515(protein binding)|GO:0005622(intracellular)|GO:0005886(plasma membrane)|GO:0016020(membrane)|GO:0016021(integral to membrane)|GO:0021954(central nervous system neuron development)|GO:0031175(neuron projection development)|GO:0043491(protein kinase B signaling cascade)|GO:0048715(negative regulation of oligodendrocyte differentiation)	AACTTGGGTTTCAATAATTAATGGATTTTTATGAAAACTTGAAATAATAAAAAGAAAAAA	1832.3	3710	2860	4700	2810	5440	2840	5230	1650	1620	2510	5000	2560	3340	3180	3530	0.576923	0.344681	0.460802	0.597447
A_55_P2131672	Mical2	microtubule associated monooxygenase, calponin and LIM domain containing 2	gb|AK163078|gb|AK138935|gb|AK161075|ens|ENSMUST00000106648	Mus musculus adult male aorta and vein cDNA, RIKEN full-length enriched library, clone:A530030N16 product:Hypothetical calponin homology homolog [Mus musculus], full insert sequence. [AK163078]	GO:0003779(actin binding)|GO:0004497(monooxygenase activity)|GO:0005575(cellular_component)|GO:0005737(cytoplasm)|GO:0005856(cytoskeleton)|GO:0008152(metabolic process)|GO:0008270(zinc ion binding)|GO:0016491(oxidoreductase activity)|GO:0016709(oxidoreductase activity, acting on paired donors, with incorporation or reduction of molecular oxygen, NADH or NADPH as one donor, and incorporation of on…	CCTTCAGCCTTTGATTTTCTACTATTATAGAATGTAGGACAATATGACACAGTGCTTCTA	368.382	442	742	908	621	840	660	836	371	384	441	491	469	475	452	375	0.5	0.422907	0.461454	0.845815
A_55_P2093034			ens|ENSMUST00000097454|ref|XM_003946056|gb|AK132815|riken|4930417B17	predicted gene 10518 [Source:MGI Symbol;Acc:MGI:3704205] [ENSMUST00000097454]		TTTGTAGAAGGTCTTTTTCTCTGTGTGTTTACTGCCTGCAATAAACGCCTTTTTAACTGC	42.4262	82.4	185	80.7	44.3	155	76.7	109	50	52.7	47.7	380	46.7	73.7	77.2	65.4	0.27027	0.653036	0.461653	2.41623
A_30_P01023771			chr9:58197113-58200614_F	lincRNA:chr9:58197113-58200614 forward strand		TAGAATAGAGTTGGGTAATATTCCATGGGGTTCCTCCATCAAGGAGATCAGATTCATGTT	72.5669	60.1	71.4	97.2	67.8	100	75.3	87.6	32.3	45.8	53.1	47.3	48.8	55.4	95.3	53.3	0.452381	0.471193	0.461787	1.04159
A_30_P01023668			chrX:92139043-92140820_R	lincRNA:chrX:92139043-92140820 reverse strand		GTTAAACCCTAAAAGAAACCATAAAGCCTAAAAAATTTAGCCCCCAAACCTAACATACAC	74.3182	35.6	226	71.4	56	63.1	68.8	61.5	97.1	35.3	52.4	40.4	42.4	47.9	70.1	39.1	0.429646	0.494398	0.462022	1.15071
A_55_P1959081	Cdkl5	cyclin-dependent kinase-like 5	gb|BC038161|tc|TC1639357|nap|NAP018605-001	Mus musculus cyclin-dependent kinase-like 5, mRNA (cDNA clone IMAGE:1511699), with apparent retained intron. [BC038161]	GO:0000166(nucleotide binding)|GO:0001764(neuron migration)|GO:0004672(protein kinase activity)|GO:0004674(protein serine/threonine kinase activity)|GO:0004693(cyclin-dependent protein kinase activity)|GO:0005524(ATP binding)|GO:0005634(nucleus)|GO:0005737(cytoplasm)|GO:0006468(protein phosphorylation)|GO:0016301(kinase activity)|GO:0016310(phosphorylation)|GO:0016740(transferase activity)|GO:001…	GAAGAGTATTTGCCTACCATGTATGAAAAACCTGGGTTATGTCCTCAAAACCATAAAAAA	117.201	82.5	218	134	205	162	210	268	81.7	73.7	98.7	52.8	68.5	77.8	365	234	0.374771	0.55	0.462385	1.46756
A_30_P01032453			chr12:89092175-89105525_R	lincRNA:chr12:89092175-89105525 reverse strand		ACATCTCACAGTCGAGAGCAAAGACCCCCGCATGGGCATCTTTGGGCAACTCCTTCTGGA	39.6821	34.4	188	58.2	32.6	50.5	96.8	56.2	67	33.1	52.8	42.9	23.9	48.8	73	62.3	0.356383	0.568729	0.462556	1.59584
A_55_P2055732						TGAGCACTCATTTCACACATATTCATTTTCTAGACTCCTCCTGTGATTTTTGTTCCAGTG	24.3521	165	75.7	76.4	70.6	104	157	177	52.2	18	51.8	76.4	55.4	95.6	183	79.6	0.689564	0.235602	0.462583	0.341668
A_30_P01031830			chr8:110196655-110390197_F	lincRNA:chr8:110196655-110390197 forward strand		TTTTTATGACCTTTGGGTGCCAGATAACACCATTCCTCCTGTCTGCTTTCACTACTCAGC	101.409	123	211	278	369	309	439	617	129	87.4	187	219	227	287	526	383	0.611374	0.314388	0.462881	0.514232
A_30_P01027273			chr1:82892851-82943201_R	lincRNA:chr1:82892851-82943201 reverse strand		GGACCCTTCCTTTCGTTAACATTAATATGCTATGGACCAATAAATCAAGTTACCAAACTA	40.7774	58.9	66.7	143	72.6	63.9	95	87	45.9	34.2	47.7	59.9	43.7	61	80.4	63.4	0.688156	0.239161	0.463658	0.347539
A_55_P2136890						AGTTTTGGTGAAACTTGCAGAATGTGGCTTTTGCACTTCTGTGGCTGTGGGTGAAGCTAA	42.4592	111	107	102	63.3	109	110	146	34.1	62.1	35.2	78.2	55.1	63.2	114	102	0.318692	0.608824	0.463758	1.91038
A_30_P01031730			chr3:84609788-84618062_F	lincRNA:chr3:84609788-84618062 forward strand		AAGAATTACTTTTAAAAGGGGGCTCGACTACATTCGCCCCTTGAAAACATAGAAATCCCC	35.7033	39.5	72.8	73.4	60.3	231	43.8	39.3	40.2	27.7	42.2	25.7	33.8	32.6	38.2	36.5	0.552198	0.377384	0.464791	0.683422
A_55_P2043587	Gm10802	predicted gene 10802	gb|AK155789|riken|F730221H19	Mus musculus B6-derived CD11 +ve dendritic cells cDNA, RIKEN full-length enriched library, clone:F730221H19 product:hypothetical protein, full insert sequence. [AK155789]	GO:0003674(molecular_function)|GO:0005575(cellular_component)|GO:0008150(biological_process)	AAAGGGCTCACTATTGAGGCAGGCACATTTGAGAACATTCCTAGTACTTCCCAGTGCTTA	114.058	177	314	509	1030	1610	1150	1750	194	159	640	831	835	662	888	735	0.617834	0.312377	0.465106	0.5056
A_55_P2172001	Mrgpra2a	MAS-related GPR, member A2A	ref|NM_001172588|ens|ENSMUST00000159004|gb|BC064040|tc|TC1585917	Mus musculus MAS-related GPR, member A2A (Mrgpra2a), mRNA [NM_001172588]	GO:0003674(molecular_function)|GO:0005575(cellular_component)|GO:0008150(biological_process)	CAACATCTCTCCACTAACTTAGTTTTTCTACCCCTCCTGAATAAAAGCATTAATCAGAAA	39.9596	52.1	75.5	112	90.3	124	98.4	116	42.2	41.6	47.2	89.2	84	107	128	72.2	0.55894	0.371429	0.465184	0.664523
A_30_P01019988			chr5:31862823-31871445_F	lincRNA:chr5:31862823-31871445 forward strand		CTGTCCTCTCCTCTTCGATGAGGGTTCTAGCTTGTCTCCTTGTGGTTAATTGGTAAATGA	2374.78	4330	1130	1870	1160	1660	1380	1610	668	636	882	1180	898	1130	1000	1340	0.59115	0.340107	0.465629	0.575331
A_55_P2035003			gb|AK163054|riken|A430106F04	Mus musculus 0 day neonate thymus cDNA, RIKEN full-length enriched library, clone:A430106F04 product:hypothetical protein, full insert sequence. [AK163054]		CATGGCCAGCAGCCTGTCAACAGACTATTTGTAATGTTGCTACCTTTAAATATCGATGTC	56.3147	50.2	70.4	54.2	75.4	60.9	75.2	76.3	31.8	26	36.4	49.7	39.8	42.7	73.6	59.8	0.451705	0.479705	0.465705	1.06199
A_66_P124164			ens|ENSMUST00000099684|ens|ENSMUST00000099683|ens|ENSMUST00000178641|ens|ENSMUST00000075573	predicted gene 10801 [Source:MGI Symbol;Acc:MGI:3641656] [ENSMUST00000099684]		TTGATTTTCAGTTTTCTCGCCATATTCCAGGTCCTTCAGTGTGCATTTCACATTTTTCAC	441.363	621	738	987	477	690	805	1050	383	408	486	591	541	615	506	561	0.51897	0.413374	0.466172	0.796527
A_55_P2068011			gb|AK138907|riken|A430110F06	Mus musculus 0 day neonate thymus cDNA, RIKEN full-length enriched library, clone:A430110F06 product:unclassifiable, full insert sequence. [AK138907]		GTGGTTATCTAGAGGTCATCGCTTATAACCTTAGCTTGTATTTTCCAGATAATTGATCAT	42.3258	41.9	68.5	89.3	55.2	68.1	56.3	68.7	28.7	46	58.5	57.4	35.4	43.4	45.9	41.2	0.418978	0.515118	0.467048	1.22946
A_55_P2181181						AAAGCTGAAGACCAACAGTGAGTGCTGTGGACTCGGCTGAGCTGCCAGCTTACACTGCCT	53.6854	160	96.3	91.5	73.2	111	80.8	58.6	54.5	33.8	55.7	66.2	51.8	191	50.7	37.6	0.56594	0.369399	0.467669	0.652718
A_30_P01021266			chr2:130697320-130729670_R	lincRNA:chr2:130697320-130729670 reverse strand		TCATTTGACACCACTCCAGTCTCAGCAGGAGGCATGGGGCCCTGAAATGTCTCCAGGAGA	85.5055	85.6	68	237	35.7	71.7	65.2	55.6	48.6	52.4	48.2	46	39.8	47.4	72.3	57.7	0.714706	0.221097	0.467901	0.309354
A_55_P2170464						TCCTACTCAACACCTCAGGGCACATGCAAGAGAATGTTCCTTCCTCTGAAAATTCAGGAT	30.8201	49.8	60.5	93.1	66.7	80.2	107	110	32.1	37.8	56.6	71.3	64.6	87.6	102	61.2	0.530579	0.406015	0.468297	0.765231
A_30_P01018692			chr11:18479852-18485704_R	lincRNA:chr11:18479852-18485704 reverse strand		GTGAATTTAGATATCAATACTTTGTATCAGTGAACTATTTTGCCTTCCCTTGGCCTTTTG	86.6752	71.2	87.1	98.6	93.8	123	192	200	38.4	48.9	59.8	51.2	49.6	64.4	194	197	0.440873	0.495943	0.468408	1.12491
A_55_P2056606			tc|TC1642106|nap|NAP056670-1			TGGAAGGGCGTTATACGTTGTAACGGGGAGACATTAAGACATCTGGAGCAGGTATTGTAA	84.0454	118	324	148	142	113	86.9	108	126	81.1	86.6	106	310	350	100	104	0.388889	0.547973	0.468431	1.40907
A_51_P377812	1700011E24Rik	RIKEN cDNA 1700011E24 gene	ref|NM_029298|ens|ENSMUST00000040609|gb|AK005861|gb|CA463115	Mus musculus RIKEN cDNA 1700011E24 gene (1700011E24Rik), mRNA [NM_029298]	GO:0003674(molecular_function)|GO:0005575(cellular_component)|GO:0008150(biological_process)	AAGGCATCCCCAAAAGGCTCTATTACTTCTTGTTTTCGATCTAAGGTTCCCCGATTCTTA	54.2955	77.6	120	55.4	55.8	51	88	61.4	50.5	28.6	33.4	33	21.4	43.2	75.5	55.3	0.420833	0.516245	0.468539	1.22672
A_55_P2045581	Olfr901	olfactory receptor 901	ref|NM_001011806|ens|ENSMUST00000063716|tc|TC1702295|nap|NAP108639-1	Mus musculus olfactory receptor 901 (Olfr901), mRNA [NM_001011806]	GO:0004871(signal transducer activity)|GO:0004930(G-protein coupled receptor activity)|GO:0004984(olfactory receptor activity)|GO:0005886(plasma membrane)|GO:0007165(signal transduction)|GO:0007186(G-protein coupled receptor signaling pathway)|GO:0007608(sensory perception of smell)|GO:0016020(membrane)|GO:0016021(integral to membrane)|GO:0050896(response to stimulus)|GO:0050911(detection of chem…	GGAGCCTCAGCATTCATGTATCTTAAGCCTTCTCCTGTTGGATCTGTGGGTGAAGATAAA	176.287	70.1	140	121	127	140	237	247	66.9	55.6	50.3	86	59.8	76.4	295	168	0.477857	0.459504	0.468681	0.961593
A_30_P01027119			chr2:158169020-158191295_R	lincRNA:chr2:158169020-158191295 reverse strand		CGAAGCTACGTGATGATATGGTGGAGATAAGAAAGCATCATGATCCCCCTCCCCTTTAAT	1037.71	2040	3400	4830	4390	5260	4060	5000	1730	2070	3970	5330	4070	4790	3030	3470	0.508824	0.428571	0.468697	0.842279
A_55_P2174490	Cd37	CD37 antigen	ref|NM_007645|ens|ENSMUST00000128823|ens|ENSMUST00000154014|ens|ENSMUST00000098461	Mus musculus CD37 antigen (Cd37), mRNA [NM_007645]	GO:0001772(immunological synapse)|GO:0002639(positive regulation of immunoglobulin production)|GO:0002920(regulation of humoral immune response)|GO:0008285(negative regulation of cell proliferation)|GO:0016020(membrane)|GO:0016021(integral to membrane)|GO:0030886(negative regulation of myeloid dendritic cell activation)|GO:0042832(defense response to protozoan)|GO:0050688(regulation of defense re…	TGGCTGCACAACAATATCATCTCCATAGTGGGAATCTGTCTGGGAGTCGGTCTTCTTGAG	61.0615	58.9	222	149	88.3	154	167	174	102	71.5	76.6	99	241	323	126	152	0.459459	0.479866	0.469663	1.04441
A_55_P2168118	4933406C10Rik	RIKEN cDNA 4933406C10 gene	ref|NR_044986|gb|AK041289|tc|TC1611122|riken|A530097G05	Mus musculus RIKEN cDNA 4933406C10 gene (4933406C10Rik), long non-coding RNA [NR_044986]	GO:0003674(molecular_function)|GO:0005575(cellular_component)|GO:0008150(biological_process)	CTGCAGGTTAACATTGTCCCTTCTCTTGGAAATTGTTTGATATCCTATCAAGTAATTTCT	47.5716	46.6	54.5	78.3	79.6	65.1	92.5	115	32.7	26.6	52.6	66.9	81.7	90.2	118	78.2	0.6	0.339719	0.46986	0.566198
A_51_P254855	Ptgs2	prostaglandin-endoperoxide synthase 2	ref|NM_011198|ens|ENSMUST00000035065|gb|AK149820|gb|M64291	Mus musculus prostaglandin-endoperoxide synthase 2 (Ptgs2), mRNA [NM_011198]	GO:0001516(prostaglandin biosynthetic process)|GO:0001525(angiogenesis)|GO:0004601(peroxidase activity)|GO:0004666(prostaglandin-endoperoxide synthase activity)|GO:0005634(nucleus)|GO:0005737(cytoplasm)|GO:0005783(endoplasmic reticulum)|GO:0005901(caveola)|GO:0006629(lipid metabolic process)|GO:0006631(fatty acid metabolic process)|GO:0006633(fatty acid biosynthetic process)|GO:0006693(prostaglan…	TTTTTGAAAAGTTTGAAGTTAGAACTTAGGCTGTTGGAATTTACGCATAAAGCAGACTGC	79.7794	102	391	478	797	1030	744	964	263	128	637	786	797	766	740	627	0.672634	0.267782	0.470208	0.39811
A_51_P115953	Ctxn3	cortexin 3	ref|NM_001134697|ens|ENSMUST00000091892|gb|AK042789|tc|TC1584394	Mus musculus cortexin 3 (Ctxn3), mRNA [NM_001134697]	GO:0003674(molecular_function)|GO:0005575(cellular_component)|GO:0008150(biological_process)|GO:0016020(membrane)|GO:0016021(integral to membrane)|GO:0031224(intrinsic to membrane)	TGTTGTTGAAGATATTGTAAAACCAAGCGCACCAACAAGCGCACCAACACTTGCGAAGAT	58.9383	97.5	54.8	88.2	112	165	119	125	31.1	32.9	63.5	68	131	142	66.4	62.2	0.567518	0.373016	0.470267	0.657276
A_30_P01023142			chr16:93121505-93142255_R	lincRNA:chr16:93121505-93142255 reverse strand		TTGCACATCTTTTAATATCAGGTATTTAAAGACTAGCTTGTGTGATAGCGGAAAGTTTGC	55.9482	35.5	55.5	72.8	44.5	68.9	82.1	95.2	26.9	33.2	17.8	26.3	21	35.8	131	79.8	0.484685	0.456044	0.470364	0.940909
A_55_P2157902	Igsf10	immunoglobulin superfamily, member 10	ref|NM_001162884|ens|ENSMUST00000039419|gb|AK132367|riken|4022435C03	Mus musculus immunoglobulin superfamily, member 10 (Igsf10), mRNA [NM_001162884]	GO:0001503(ossification)|GO:0003674(molecular_function)|GO:0005575(cellular_component)|GO:0005576(extracellular region)|GO:0042246(tissue regeneration)	TTTCTGCTCCAACATCCATATCCCTGGGAAAAACTCCTATAGACACTAGTGGTCACCTGA	109.826	131	72.1	69.4	63.8	59.6	58.7	60.4	42	24.9	31.2	39.7	70.3	65	59.7	31.7	0.582524	0.35879	0.470657	0.615922
A_30_P01029550			chr13:98571741-98603323_F	lincRNA:chr13:98571741-98603323 forward strand		TTAATGTGTTCTGGCTGGCAAGATGTCTTCTCCATTCCATTCACCGCAATGAAACCGAGA	91.652	62	62.6	53.8	48.9	60.3	76.8	80.1	22.1	31.7	41.2	50.2	29.7	34	97	55.3	0.353035	0.589219	0.471127	1.66901
A_55_P2133410			ens|ENSMUST00000086887	predicted gene 10197 [Source:MGI Symbol;Acc:MGI:3704501] [ENSMUST00000086887]		GTCTGCTTCTCCATGGGAGAACTCTGTGCTTTCCACATCCACTTCAATCTCCTCTGCGGG	47.5629	58.7	117	168	157	255	323	332	64.5	65.8	109	135	138	137	477	169	0.551282	0.391667	0.471474	0.710465
A_55_P2019989						AGAATGGCTCTGTATCCTTCAGCAAGTCCTTTCCTTTCTCCGGACGGGCTGGCTAGGTGC	54.098	51	52.7	85.6	73.2	96.8	142	185	22.3	44.5	62.5	73.4	76	76.7	146	121	0.42315	0.51986	0.471505	1.22855
A_55_P2012869						ATTCTTAGTTTGATTGAAGAGAATATTGATAAAATGTTGCGCCCGCTCTCGACCAGCAAG	396.04	216	619	423	523	384	410	459	262	220	285	258	318	281	530	384	0.423263	0.520095	0.471679	1.22877
A_30_P01028351			chr14:77258025-77278750_F	lincRNA:chr14:77258025-77278750 forward strand		CCCTTCCTTTGTTGGTAACATTTTCCTAGCTGCATCCACTTCCATTTTATGACTCAATTT	51.1938	147	76.4	94.5	191	107	140	143	46.4	31.8	74.2	72.5	73.3	75.5	142	123	0.60733	0.336508	0.471919	0.554078
A_30_P01026277			chr2:35828611-35838083_F	lincRNA:chr2:35828611-35838083 forward strand		TTTGTCCCACCCCGTCCCTTAAAAGGTCTGAAATGAATTCAAGGGTGATTCATCTGCTCA	522.246	746	698	983	751	863	745	915	395	373	491	642	359	495	431	537	0.565903	0.379451	0.472677	0.670523
A_55_P2113940	Gm9776	predicted gene 9776	ref|NR_045619|gb|AK162882|gb|AK041197|tc|TC1585199	Mus musculus predicted gene 9776 (Gm9776), long non-coding RNA [NR_045619]	GO:0003674(molecular_function)|GO:0005575(cellular_component)|GO:0008150(biological_process)	GCGATCATCCGCCTGCAAGCTTTGCCTAAGTTTTTCCTGGGGCCCGAGGTTCTTACTTGA	182.708	153	241	177	174	159	171	175	101	93.2	86.2	150	176	131	172	157	0.419087	0.526554	0.47282	1.25643
A_52_P646602	9030624J02Rik	RIKEN cDNA 9030624J02 gene	ref|NM_027815|ens|ENSMUST00000136623|ens|ENSMUST00000129334|ens|ENSMUST00000059390	Mus musculus RIKEN cDNA 9030624J02 gene (9030624J02Rik), mRNA [NM_027815]	GO:0003674(molecular_function)|GO:0005575(cellular_component)|GO:0008150(biological_process)|GO:0016020(membrane)|GO:0016021(integral to membrane)	CACGAGTGTTATTCAGTTCTACCCAAGCAAGTTTGTCCTCATCACCGACATCCTTGATAC	121.894	211	170	294	269	135	129	147	87.4	127	88.5	108	105	105	139	141	0.514118	0.431973	0.473045	0.840222
A_55_P2042606	Pls1	plastin 1 (I-isoform)	ens|ENSMUST00000119760|tc|TC1698517	plastin 1 (I-isoform) [Source:MGI Symbol;Acc:MGI:104809] [ENSMUST00000119760]	GO:0003779(actin binding)|GO:0005509(calcium ion binding)|GO:0005737(cytoplasm)|GO:0008150(biological_process)|GO:0046872(metal ion binding)	TTGGATTTTCAAGTTTCTGAGTTTGTTTCTCAGGACCCCTGACTGCCAGGCGCTAAGTAA	74.4326	64.8	65.6	76.9	67.5	94.8	141	147	30.1	37.5	53.6	84.7	114	127	120	107	0.458841	0.487646	0.473244	1.06278
A_30_P01020958			chrX:11699327-11699881_R	lincRNA:chrX:11699327-11699881 reverse strand		TAGCTCTGGTCTCTGGTCTGTTTAATACTACTGATGGCTCTTGCAAGGGAGTAGGAGTAA	82.765	110	128	143	92.5	136	165	205	60.1	68.3	72.7	104	87.4	97.6	131	149	0.469531	0.477622	0.473577	1.01723
A_30_P01017590			chrX:75813213-75829323_F	lincRNA:chrX:75813213-75829323 forward strand		GCTTCTAAACGCCTTTCTTCTTTCTTCTAACTCGGCAGCTCCTACACACCTTTAAGTCTC	77.7235	48.8	69.4	70	98.9	137	219	210	43.8	22.3	71.1	58.6	73.3	65.2	242	185	0.631124	0.318571	0.474848	0.504768
A_55_P2156914						AGTCATGTGAGCTCCGTGGTGACGATGGCTCATGCTTATCTGTCAGCTTGCCTCCCACTG	67.4381	64.6	77.7	90.6	74.8	72.3	89.9	107	36.4	43.6	70	48.9	51.1	57.4	88.7	71.6	0.468468	0.481236	0.474852	1.02725
A_30_P01025191			chr12:16447157-16447657_F	lincRNA:chr12:16447157-16447657 forward strand		ATCCCATACTGTCCCTATAGATCCCATACTTGACTCTATGTGTCAAAAAATCTGTTTGGA	120.718	51.7	98.2	111	155	140	131	175	46.4	53	97	126	95.7	97.7	209	125	0.472505	0.477477	0.474991	1.01052
A_55_P2109589	Slc1a4	solute carrier family 1 (glutamate/neutral amino acid transporter), member 4	ref|NM_018861|ens|ENSMUST00000004634|ens|ENSMUST00000109594|gb|BC052733	Mus musculus solute carrier family 1 (glutamate/neutral amino acid transporter), member 4 (Slc1a4), mRNA [NM_018861]	GO:0003333(amino acid transmembrane transport)|GO:0005254(chloride channel activity)|GO:0005882(intermediate filament)|GO:0006810(transport)|GO:0006821(chloride transport)|GO:0006835(dicarboxylic acid transport)|GO:0015175(neutral amino acid transmembrane transporter activity)|GO:0015180(L-alanine transmembrane transporter activity)|GO:0015193(L-proline transmembrane transporter activity)|GO:0015…	CTGTATTTACATATACTTTATGTATCAAGTGTGTGTGTGTATGTGTGTGCTTTTAGCTCC	2450.91	5120	2000	3590	1730	3270	2040	3290	925	1760	1740	3240	2250	3880	1830	2940	0.4625	0.490251	0.476375	1.06
A_55_P2108077			gb|M13677|gb|AF481157|gb|AF481151|gb|AF481149	Mouse T-cell receptor active beta-chain V-region V2DJ mRNA. [M13677]		AACAATTCTTTCTGCTCTCTCTACATTGGCTCTGCAGGCCTAGAGTATTCTGCCATGTAC	33.0264	44.4	52.9	52.2	57.1	60.9	98.7	65.5	27.1	23	45.6	68.5	40.5	59.6	79.6	79.4	0.512287	0.440613	0.47645	0.86009
A_30_P01029222			chr3:86827945-86886695_R	lincRNA:chr3:86827945-86886695 reverse strand		CCATTTGTTTATCCAGGAAAATTACATCTTCACATCTATCTCTTCTCCTCTGTGAAATAG	31.8621	135	55.7	57.1	59	66.4	104	84.4	33	20.6	45.3	19.9	47	44.1	139	72.8	0.59246	0.360771	0.476615	0.608937
A_30_P01026953			chr2:170029045-170034220_F	lincRNA:chr2:170029045-170034220 forward strand		CTCCTCTTTGATATTTATAACTCGGGATCATCGCTTTACCGCTCTTCTCTGTGTCTCTGG	69.4759	108	201	299	209	202	546	495	127	96.2	124	182	192	245	856	464	0.631841	0.321739	0.47679	0.509209
A_55_P2088145			nap|NAP095950-001			TCACCCACTCTCACACTCTAAGGTTCAGATAGATATCTATTGCTTACAGCCCAATGGTCA	140.846	70.2	201	233	215	215	266	242	115	89.2	134	170	374	379	269	235	0.572139	0.382833	0.477486	0.669125
A_30_P01028838			chr7:137669441-137675722_R	lincRNA:chr7:137669441-137675722 reverse strand		TCTTTTCGCTGCATATTCTGGAAGCCTGTGTGGTCACTTGTGCTGGCTCTGTGGTCTGGT	70.987	138	123	168	149	214	233	368	36.2	111	115	142	131	167	346	308	0.294309	0.660714	0.477512	2.24497
A_30_P01031797			chr6:12072440-12075161_R	lincRNA:chr6:12072440-12075161 reverse strand		TATGTGAACACCTTCCTGTTCATCTCCAACAAGCGTCCTCCTAAGGTATATGTTATTGAC	53.0499	61.3	80.2	107	72.8	98.6	107	100	40.2	48.7	67.8	87.7	64.8	79.4	117	76	0.501247	0.45514	0.478194	0.908016
A_52_P8922	Sntb2	syntrophin, basic 2	ref|NM_009229|ens|ENSMUST00000047425|gb|AK016068|gb|AK040423	Mus musculus syntrophin, basic 2 (Sntb2), mRNA [NM_009229]	GO:0003779(actin binding)|GO:0005515(protein binding)|GO:0005516(calmodulin binding)|GO:0005737(cytoplasm)|GO:0005856(cytoskeleton)|GO:0005874(microtubule)|GO:0016020(membrane)|GO:0030054(cell junction)|GO:0031410(cytoplasmic vesicle)|GO:0043234(protein complex)|GO:0045202(synapse)	ACCAACAAATAGCTCATTGTTACTGATTTGTTTGTTTTCCTAACTTATTCTCCTGGACAG	224.071	249	536	698	693	864	647	810	266	322	481	592	608	538	907	605	0.496269	0.461318	0.478793	0.929573
A_66_P135372	4933434I20Rik	RIKEN cDNA 4933434I20 gene	ens|ENSMUST00000139692|ref|XM_001474200|gb|HM067443|gb|AK017057	RIKEN cDNA 4933434I20 gene [Source:MGI Symbol;Acc:MGI:1914805] [ENSMUST00000139692]	GO:0003674(molecular_function)|GO:0005575(cellular_component)|GO:0005576(extracellular region)|GO:0005975(carbohydrate metabolic process)|GO:0008150(biological_process)|GO:0016020(membrane)|GO:0016740(transferase activity)|GO:0016757(transferase activity, transferring glycosyl groups)|GO:0016758(transferase activity, transferring hexosyl groups)	CTCATGTGGAATGCATGACCGACCCCTGGGCACACTTTTTCAATGGTTGAATTTGCTTGT	58.0429	135	69.3	72.4	41.9	52.6	104	79.1	19.2	49.3	35.3	56.9	33.2	55.4	77.7	63.7	0.277056	0.680939	0.478998	2.45777
A_51_P207028	Vmn1r227	vomeronasal 1 receptor 227	ref|NM_134195|ens|ENSMUST00000088829|tc|NP496271|nap|NAP057723-1	Mus musculus vomeronasal 1 receptor 227 (Vmn1r227), mRNA [NM_134195]	GO:0005550(pheromone binding)|GO:0005887(integral to plasma membrane)|GO:0007186(G-protein coupled receptor signaling pathway)|GO:0016503(pheromone receptor activity)|GO:0019236(response to pheromone)	AAGAGGGTTCAGCATACCCTTCATGCTCATTCTTCCCTCAGAACTTCCACTGAAAACAGA	82.3334	46.4	52.5	65.3	80.8	83.7	114	173	39.3	13.7	95.5	85.8	79.1	70.2	165	101	0.748571	0.209801	0.479186	0.280268
A_30_P01027558			chr7:99879368-99889978_F	lincRNA:chr7:99879368-99889978 forward strand		AGAGTCTCCCCAGGAAGTCTAAGGGTTTCTCCACGCTCAGTAAAGCGACTCCCTGTGTCC	137.557	288	296	410	447	999	614	1230	120	227	430	895	547	667	840	806	0.405405	0.553659	0.479532	1.36569
A_55_P2030560	Trabd2b	TraB domain containing 2B	ref|NM_001085549|ens|ENSMUST00000094894|tc|TC1634793|nap|NAP024691-001	Mus musculus TraB domain containing 2B (Trabd2b), mRNA [NM_001085549]	GO:0004222(metalloendopeptidase activity)|GO:0005886(plasma membrane)|GO:0005887(integral to plasma membrane)|GO:0006508(proteolysis)|GO:0008152(metabolic process)|GO:0008233(peptidase activity)|GO:0008237(metallopeptidase activity)|GO:0016020(membrane)|GO:0016021(integral to membrane)|GO:0016055(Wnt receptor signaling pathway)|GO:0016787(hydrolase activity)|GO:0017147(Wnt-protein binding)|GO:001…	GACTAAATAAACATCAGCGGCCAAGGCAGTTCAATGACCTCTGGGTCCGAATCGAGGACA	37.6867	32.4	177	60.7	63.3	62	89	102	60.4	37.6	54.6	44.5	71	66.5	83.1	54.4	0.341243	0.61944	0.480341	1.81525
A_30_P01030152			chr2:77146893-77155643_F	lincRNA:chr2:77146893-77155643 forward strand		TAAACTCTGTAGAATGCCTCTCTCATGATTTATTGTTCCTACAAGCACTTCTCGCCTCTC	57.6612	47.3	59.8	57.1	67.7	81.3	96.6	102	31.9	24.4	40.2	45.4	41.3	44.7	96	86	0.533445	0.42732	0.480383	0.801058
A_55_P2336623	E030042N06Rik	RIKEN cDNA E030042N06 gene	gb|AK087301|tc|TC1604506|riken|E030042N06|nap|NAP120570-001	Mus musculus 0 day neonate lung cDNA, RIKEN full-length enriched library, clone:E030042N06 product:unclassifiable, full insert sequence. [AK087301]		CCTACCCCCATTTGTGCAGAAATTTTGTCTGCCCAGATTCTAAATTTTTATTACACATAA	188.517	140	256	211	239	253	307	401	133	93.3	151	178	145	177	403	298	0.519531	0.44218	0.480856	0.851114
A_30_P01017509			chr9:24292762-24307562_R	lincRNA:chr9:24292762-24307562 reverse strand		TGCCCAAGCTTTAACCTTGCCTGCTGGCATCTCTTTACCTTCTTCCATGCACCAAATGGA	75.3838	91.6	153	134	166	188	199	236	60.7	75.8	127	139	192	134	226	171	0.396732	0.565672	0.481202	1.42583
A_30_P01023333			chr13:108548345-108679004_R	lincRNA:chr13:108548345-108679004 reverse strand		TATATGAAGTCTGAACACTGCTAACAAATACTGCAAACCAGACCCAGGCTAAGCAGGAGG	33.8541	39.1	77.6	52.4	39.4	26.6	42.3	36.9	42.8	21.6	32.9	45.6	40.1	29.4	34.5	30	0.551546	0.412214	0.48188	0.747378
A_30_P01032253			chr18:3003075-3016150_F	lincRNA:chr18:3003075-3016150 forward strand		AAATCTATGTATTTCTGGTTGTCTGTGTTGCCCCTGTACAGGCTGGCTTAGTCAGAACCA	48.2241	105	54.1	96.8	53.3	89.2	129	124	35.8	29.4	49.7	44.2	42.3	47.1	90.7	107	0.661738	0.303719	0.482728	0.458972
A_55_P2183940	Olfr47	olfactory receptor 47	ref|NM_146370|ens|ENSMUST00000078057|gb|AF102521|gb|BC120658	Mus musculus olfactory receptor 47 (Olfr47), mRNA [NM_146370]	GO:0004871(signal transducer activity)|GO:0004930(G-protein coupled receptor activity)|GO:0004984(olfactory receptor activity)|GO:0005886(plasma membrane)|GO:0007165(signal transduction)|GO:0007186(G-protein coupled receptor signaling pathway)|GO:0007608(sensory perception of smell)|GO:0016020(membrane)|GO:0016021(integral to membrane)|GO:0050896(response to stimulus)|GO:0050911(detection of chem…	AATCAAGTTGTCATTTTTGCAGCCTGTGTGTTCACTTTAGTGGGGCCCCTGTGCTTTGTA	107.052	88.7	97.1	92.5	76.4	101	170	191	56.8	35.2	62.6	56.8	53.2	56.2	185	146	0.584964	0.380541	0.482752	0.650537
A_55_P2059120			tc|TC1715973	Q3TE54_MOUSE (Q3TE54) 2 days neonate thymus thymic cells cDNA, RIKEN full-length enriched library, clone:E430029H02 product:SKAP55 adaptor protein homolog, partial (13%) [TC1715973]		ATATCACTCGCTGCATCGTCTGTCACACAAGTTCCCAAGCCTTTCGACTGCTCCTTTTCA	36.3018	35	62.8	87.5	89.1	70.4	181	175	40.8	27.7	44.4	48	58.6	64.4	237	143	0.649682	0.316571	0.483126	0.487272
A_55_P2189903			ens|ENSMUST00000141787|ref|XR_104790|ref|XR_107520|gb|AK083419	RIKEN cDNA A730011C13 gene [Source:MGI Symbol;Acc:MGI:2442973] [ENSMUST00000141787]		TCATACCCCTTACTATGTACAATATTCATGCAAATTTGTGCCTCGCTCTGTTAACAGGTG	70.0308	46.4	60.4	64.5	83.8	75.5	112	117	24.4	36.3	37.2	53.4	58.8	45.8	132	106	0.403974	0.562791	0.483382	1.39314
A_55_P2283116	4930478P22Rik	RIKEN cDNA 4930478P22 gene	ref|NR_046060|gb|AK016658|riken|4933405A14|nap|NAP115868-1	Mus musculus RIKEN cDNA 4930478P22 gene (4930478P22Rik), long non-coding RNA [NR_046060]		AAACAATTTGTTTTGTTTTGTTTTGTTTTTGCGTTTAGCTTCAGAACTCATGGCAATGTC	100.534	133	122	164	104	160	125	119	51.6	89.3	108	191	115	127	103	108	0.422951	0.544512	0.483732	1.28741
A_30_P01030136			chr17:15368546-15377747_R	lincRNA:chr17:15368546-15377747 reverse strand		AATTCTACTCAGTTTGGAAGAACCGTCTGTCCTTTAAGTCCTTGGTCTGGACACCTGGTT	50.3481	59.8	77.2	113	95.4	113	230	263	36.7	56	66.2	71.5	71.8	113	275	181	0.475389	0.495575	0.485482	1.04246
A_55_P2049323	Gm4755	predicted gene 4755	gb|AK089512|riken|F730043H23|nap|NAP023740-001	Mus musculus B6-derived CD11 +ve dendritic cells cDNA, RIKEN full-length enriched library, clone:F730043H23 product:unclassifiable, full insert sequence. [AK089512]	GO:0003674(molecular_function)|GO:0005575(cellular_component)|GO:0008150(biological_process)	GACTCTACACTGTGGAACCAGCCTTCTGGGAATTCAACAGCCTCCTTTACACACACCACA	56.0802	36.8	59.9	66.6	61.2	79.5	181	80.9	22.4	39.8	39.9	45.4	61.5	58.1	136	72.4	0.373957	0.597598	0.485777	1.59804
A_55_P2093862			ens|ENSMUST00000099042|ens|ENSMUST00000177601|ens|ENSMUST00000099056|ens|ENSMUST00000179264	predicted gene 10717 [Source:MGI Symbol;Acc:MGI:3642031] [ENSMUST00000099042]		GCCATATTCCTGGTCCTACAGTGTGCATTTCTCATTTTTCACGTTTTTCAGTGATTTTGT	378.67	462	575	804	364	549	718	817	315	341	413	458	449	536	374	472	0.547826	0.424129	0.485978	0.774204
A_55_P2092030	Cyp4a10	cytochrome P450, family 4, subfamily a, polypeptide 10	ref|NM_010011|ref|NM_001100181|ens|ENSMUST00000058785|ens|ENSMUST00000094886	Mus musculus cytochrome P450, family 4, subfamily a, polypeptide 10 (Cyp4a10), mRNA [NM_010011]	GO:0004497(monooxygenase activity)|GO:0005506(iron ion binding)|GO:0005737(cytoplasm)|GO:0005783(endoplasmic reticulum)|GO:0006631(fatty acid metabolic process)|GO:0008391(arachidonic acid monooxygenase activity)|GO:0008392(arachidonic acid epoxygenase activity)|GO:0016020(membrane)|GO:0016324(apical plasma membrane)|GO:0016491(oxidoreductase activity)|GO:0016705(oxidoreductase activity, acting o…	GGCATTGTCAGAGAACTCAGTACATCTGTCACCTTCCCTGATGGACGCTCTTTACCCAAA	63.3003	72.1	149	79.1	93.3	150	104	174	41.6	54.8	80.2	82	83.2	101	187	131	0.279195	0.692794	0.485994	2.4814
A_52_P214630	Sox9	SRY-box containing gene 9	ref|NM_011448|ens|ENSMUST00000000579|gb|AK049986|gb|AK220197	Mus musculus SRY-box containing gene 9 (Sox9), mRNA [NM_011448]	GO:0000976(transcription regulatory region sequence-specific DNA binding)|GO:0000981(sequence-specific DNA binding RNA polymerase II transcription factor activity)|GO:0001046(core promoter sequence-specific DNA binding)|GO:0001077(RNA polymerase II core promoter proximal region sequence-specific DNA binding transcription factor activity involved in positive regulation of transcription)|GO:0001158…	ATAAAACCTTAAAGCGTTCTTATAATATGGCATCTTTCGATTTCTGTATAAAAACAGACC	1323.26	1610	1290	1630	1670	2200	1470	1940	955	379	1380	1930	2440	2420	1830	1720	0.74031	0.232515	0.486413	0.314078
A_52_P564413	Pik3c2g	phosphatidylinositol 3-kinase, C2 domain containing, gamma polypeptide	ref|NM_207683|ens|ENSMUST00000032353|gb|BC099684|gb|AK090232	Mus musculus phosphatidylinositol 3-kinase, C2 domain containing, gamma polypeptide (Pik3c2g), transcript variant 1, mRNA [NM_207683]	GO:0000166(nucleotide binding)|GO:0005524(ATP binding)|GO:0005635(nuclear envelope)|GO:0005794(Golgi apparatus)|GO:0005886(plasma membrane)|GO:0005942(phosphatidylinositol 3-kinase complex)|GO:0006935(chemotaxis)|GO:0007154(cell communication)|GO:0016020(membrane)|GO:0016301(kinase activity)|GO:0016303(1-phosphatidylinositol-3-kinase activity)|GO:0016310(phosphorylation)|GO:0016740(transferase ac…	TCTCCCCCATCATCATTCATCCTACTCAATAGACTCCATACCGAATAGAGAGAAAAGAAG	115.027	70.2	153	99.9	128	132	129	156	71.4	50.6	88.8	64.6	87.3	97.3	146	129	0.466667	0.506507	0.486587	1.08537
A_55_P2142326	Zkscan7	zinc finger with KRAB and SCAN domains 7	gb|BC042569|tc|TC1616511|tc|TC1638638	Mus musculus zinc finger protein 167, mRNA (cDNA clone IMAGE:3994925), with apparent retained intron. [BC042569]	GO:0003674(molecular_function)|GO:0005575(cellular_component)|GO:0005634(nucleus)|GO:0006351(transcription, DNA-dependent)|GO:0006355(regulation of transcription, DNA-dependent)|GO:0008150(biological_process)|GO:0046872(metal ion binding)	TGGGGTCGGCTCGAGTTGTTGGCTCCCGTGCGTCAGCGCTGCACGGGGCAGACGCGGCCA	45.1505	33.7	51.5	59.5	50.5	55.3	40.2	51.2	25.4	28.6	53.2	50.1	34.4	38	103	45.3	0.493204	0.480672	0.486938	0.974591
A_55_P2177578	Atp6v0a1	ATPase, H+ transporting, lysosomal V0 subunit A1	ens|ENSMUST00000139857|gb|AK166356|riken|G830048I15	ATPase, H+ transporting, lysosomal V0 subunit A1 [Source:MGI Symbol;Acc:MGI:103286] [ENSMUST00000139857]	GO:0000220(vacuolar proton-transporting V-type ATPase, V0 domain)|GO:0005515(protein binding)|GO:0005634(nucleus)|GO:0005737(cytoplasm)|GO:0005794(Golgi apparatus)|GO:0005886(plasma membrane)|GO:0006810(transport)|GO:0006811(ion transport)|GO:0015078(hydrogen ion transmembrane transporter activity)|GO:0015991(ATP hydrolysis coupled proton transport)|GO:0015992(proton transport)|GO:0016020(membran…	ACTACTTCCAGTTCCAGCTATTTAAAATTCACTCTCCTTGCCCGAGCTTTCGTGGCGTAA	46.0778	46	93.9	107	131	149	180	224	47.5	50.1	84.6	110	111	125	241	194	0.505857	0.468224	0.487041	0.925606
A_30_P01019542			chr3:125556577-125557102_R	lincRNA:chr3:125556577-125557102 reverse strand		CACAGGCTGACTTATCTAAACACAATTAATTGATCATGCTATCTCTTCTTTCTCAGTCAT	14.6459	7.08	104	142	120	127	90.8	86.5	71.4	40.9	78.7	67.8	59.1	50.4	71.2	52.9	0.686538	0.288028	0.487283	0.419537
A_55_P2016586						CCCCACACAGGGTTTAGAGAAAGTGTTACTCTGTCCCACCCAGACTGGAGTCTTCCAGAG	70.7565	106	88.5	241	122	140	124	123	62.7	64.4	103	115	100	105	150	116	0.708475	0.26722	0.487847	0.377176
A_55_P2349258	Ptk2	PTK2 protein tyrosine kinase 2	ref|NM_001130409|ens|ENSMUST00000170939|gb|AB011499|gb|AB030035	Mus musculus PTK2 protein tyrosine kinase 2 (Ptk2), transcript variant 2, mRNA [NM_001130409]	GO:0000165(MAPK cascade)|GO:0000166(nucleotide binding)|GO:0000226(microtubule cytoskeleton organization)|GO:0001525(angiogenesis)|GO:0001568(blood vessel development)|GO:0001570(vasculogenesis)|GO:0001764(neuron migration)|GO:0001934(positive regulation of protein phosphorylation)|GO:0003779(actin binding)|GO:0004672(protein kinase activity)|GO:0004713(protein tyrosine kinase activity)|GO:000471…	TGTGGCTTTGTAGAAAGTGTATTTTTCTCAGCTCACAGTTGTGATCATGCTGGAGCCTTC	42.5401	65.5	58.9	75	73.6	124	67.9	93.7	39.9	22.5	50.1	68.2	62.3	62	37.1	37.3	0.677419	0.3	0.48871	0.442857
A_51_P351166	Myod1	myogenic differentiation 1	ref|NM_010866|ens|ENSMUST00000072514|gb|BC103613|gb|BC103618	Mus musculus myogenic differentiation 1 (Myod1), mRNA [NM_010866]	GO:0000381(regulation of alternative nuclear mRNA splicing, via spliceosome)|GO:0000790(nuclear chromatin)|GO:0001047(core promoter binding)|GO:0003677(DNA binding)|GO:0003700(sequence-specific DNA binding transcription factor activity)|GO:0003705(RNA polymerase II distal enhancer sequence-specific DNA binding transcription factor activity)|GO:0005515(protein binding)|GO:0005634(nucleus)|GO:00056…	TTTTGTTGTTGTTGTTGTAGTCCTTCAGTTGTTTGTTTGTTTTTTCATGCGGCTCACAGC	97.8958	51.7	80.2	90.8	43.8	103	119	143	40	43.5	48.5	71.1	79.4	89.4	127	118	0.498753	0.479075	0.488914	0.960545
A_51_P517001	D130040H23Rik	RIKEN cDNA D130040H23 gene	ref|NM_172491|gb|AK051365|tc|TC1592491|riken|D130040H23	Mus musculus RIKEN cDNA D130040H23 gene (D130040H23Rik), mRNA [NM_172491]	GO:0003674(molecular_function)|GO:0005575(cellular_component)|GO:0008150(biological_process)	CATGAAAGAACTCATACTGAAAGGAATCTCTGACTATAAAGTGTTTAGTGAGATCTGTAG	90.0127	106	66	62.1	41.3	60.5	44.7	59.3	24.7	37.5	27.9	56	67.3	72.5	60.5	34.4	0.374242	0.603865	0.489054	1.61357
A_55_P2321919	Gm16863	predicted gene, 16863	ref|NR_046162|gb|AK043964|tc|TC1611424|riken|A830060N17	Mus musculus predicted gene, 16863 (Gm16863), long non-coding RNA [NR_046162]		TGTGTTTTCTCCTGTGCTTTATCGCTTTCTCCTTGGTACTGGTGATTAAAAAGTAAAAAA	51.8224	55.5	60.1	71	57.3	83.5	124	138	25.1	39.8	41.6	59.3	30.9	58.4	120	105	0.417637	0.560563	0.4891	1.34223
A_66_P100268			gb|AK087888|gb|EU234049|tc|NP714769|tc|TC1619420	Mus musculus 2 days pregnant adult female ovary cDNA, RIKEN full-length enriched library, clone:E330037F14 product:similar to HYPOTHETICAL PROTEIN ORF-1137 [Mus musculus], full insert sequence. [AK087888]		CCTCCTGATATATAATAATCAGAACAACAAATGCACTAAATAAAGATAGAATATTAAAAG	2003.06	3380	2570	4020	2480	3200	2290	3060	1130	2170	2190	2670	2570	2040	2010	2040	0.439689	0.539801	0.489745	1.22769
A_30_P01025202			chr3:35236023-35241498_F	lincRNA:chr3:35236023-35241498 forward strand		ACTTTAGCAGTCTGGTTCTCTTCCCTGTCGTCAGTCAGCACTGGGTTGAAATTGTTTCTA	92.1312	78.1	169	142	149	162	212	306	84.5	68.1	113	148	134	146	247	197	0.5	0.479577	0.489789	0.959155
A_30_P01024228			chr16:31321192-31333486_F	lincRNA:chr16:31321192-31333486 forward strand		TTGTGATGTCTCTATCCTCTCCTTTATACCCTTTTTGGTCATTTCCTTTATGTGAAGGAG	54.2716	63.8	113	119	177	133	181	153	61.5	51.9	131	113	133	109	207	192	0.544248	0.436134	0.490191	0.801353
A_30_P01020782			chr4:88582120-88582754_F	lincRNA:chr4:88582120-88582754 forward strand		GCCCCCACAATGTTCAAATGATAAAAATACTTAGACACAAGTAATGCAATTGTGGCAATT	54.89	63.4	81.7	131	91.3	107	127	104	32.8	75.9	75.5	78.7	44.3	87.2	103	91.4	0.401469	0.579389	0.490429	1.44317
A_30_P01023400			chr14:33923944-34003394_R	lincRNA:chr14:33923944-34003394 reverse strand		TTATTTTCTAGTGTGATTTCTAGAGGGGACACAGGATGTCAACGTCTGCCCTAGCTCACT	1837.36	2030	3330	3660	3480	3570	1900	2300	1520	1920	2170	2620	2520	2280	2400	2410	0.456456	0.52459	0.490523	1.14927
A_55_P2069410						AGCCAGTGCCACCTTTGCTACACACTCCTATGCCTCTCGTCTCAGAAAACGCCAAGTAGG	177.479	226	338	461	370	425	465	489	177	211	305	328	301	313	485	403	0.523669	0.457701	0.490685	0.874027
A_30_P01032956			chr5:92548501-92566401_R	lincRNA:chr5:92548501-92566401 reverse strand		TTTGATGTCTAGAAAGAGTTAAGGACAATGTCTTCCTGCTTGTGCTCTCAAGCCGTGTGG	199.706	360	365	451	730	962	837	1140	190	208	591	783	776	678	877	693	0.520548	0.461197	0.490873	0.885984
A_55_P2042973	1010001N08Rik	RIKEN cDNA 1010001N08 gene	ref|XR_168572|ref|XR_168766|gb|AK033147|tc|TC1615596	PREDICTED: Mus musculus RIKEN cDNA 1010001N08 gene (1010001N08Rik), misc_RNA [XR_168572]	GO:0003674(molecular_function)|GO:0005575(cellular_component)|GO:0008150(biological_process)	TATAACTCACTGGTGAATTGCTTAATGTTCAAGGATGTGGGTTCGATTCTCACGCACTAC	58.9485	14.2	69.7	51.2	75.5	66.7	130	197	27.6	30	45.7	39.4	62.8	39.7	299	152	0.395983	0.585938	0.49096	1.4797
A_30_P01022847			chr17:5795893-5835243_R	lincRNA:chr17:5795893-5835243 reverse strand		ATCCTGTTGAGGTTCACACTGCATCTTCAGCCTTCCTTCTTAGTGGAGAAAACAGAATGG	35.7453	53	66.3	103	170	94.8	139	185	46.7	28.6	62.1	56.6	66.5	90.9	189	114	0.704374	0.27767	0.491022	0.394208
A_55_P2218748	C77488	EST C77488	gb|BG079202|tc|TC1642839	H3037A08-5 NIA Mouse 15K cDNA Clone Set Mus musculus cDNA clone H3037A08 5'. [BG079202]		TTTGTTATGACCAGCTTGTTTGTTATCCCAGGGAAACCTGCCCTTTTCTGAAGAGAAGCG	116.845	90.8	136	119	135	99.4	176	219	52.4	71.2	68.4	60.2	59.5	60.1	201	138	0.385294	0.598319	0.491807	1.55289
A_30_P01027462			chr17:25989799-25992334_R	lincRNA:chr17:25989799-25992334 reverse strand		ATTCCTGTTCAGCTCCTGCTCTCAGGGCTCCCTAGTCCAGTACAGCTGTGCTGACTCTCA	236.68	372	327	539	399	590	412	512	191	216	341	500	356	452	399	539	0.584098	0.400742	0.49242	0.686087
A_55_P1952644						TGTGCCATTGATTCTGTGCCTTCTTACCCAGTACCTCCAAGGATAGTCTCAGGCGGCTGA	96.9815	80.6	80.4	79.3	77.5	52.3	199	133	22	56.4	63.3	64.1	62.8	62.2	180	105	0.273632	0.711223	0.492428	2.5992
A_51_P211854	Selp	selectin, platelet	ref|NM_011347|ens|ENSMUST00000161020|ens|ENSMUST00000162746|gb|M87861	Mus musculus selectin, platelet (Selp), mRNA [NM_011347]	GO:0001530(lipopolysaccharide binding)|GO:0001948(glycoprotein binding)|GO:0002687(positive regulation of leukocyte migration)|GO:0002691(regulation of cellular extravasation)|GO:0005515(protein binding)|GO:0005615(extracellular space)|GO:0005634(nucleus)|GO:0005737(cytoplasm)|GO:0006954(inflammatory response)|GO:0007155(cell adhesion)|GO:0007157(heterophilic cell-cell adhesion)|GO:0007159(leukoc…	ATGCCTGCTTTAAGATCTCCTGGGTCTTCCATGTTTCATATCAATGAGGTTGTTTACACC	66.7565	142	200	279	387	478	574	682	106	127	331	445	383	339	486	521	0.53	0.455197	0.492599	0.858863
A_30_P01029878			chr7:67111261-67120645_R	lincRNA:chr7:67111261-67120645 reverse strand		TACTTCTCAAACTCAAGCATATTAGAACACAAAATTTGCTTTATGTCTGTTTTCTTTCTA	219.102	295	111	353	57.9	70.7	36.4	50.3	81.7	88.2	25.8	44.4	48.3	42.2	40.7	29.8	0.736036	0.249858	0.492947	0.339465
A_51_P100997	Serpinb3c	serine (or cysteine) peptidase inhibitor, clade B, member 3C	ref|NM_201363|ens|ENSMUST00000027565|gb|AK003650|tc|TC1591158	Mus musculus serine (or cysteine) peptidase inhibitor, clade B, member 3C (Serpinb3c), mRNA [NM_201363]	GO:0004867(serine-type endopeptidase inhibitor activity)|GO:0005515(protein binding)|GO:0005576(extracellular region)|GO:0010951(negative regulation of endopeptidase activity)|GO:0030162(regulation of proteolysis)	ATTTTAATCTAGGTTCTTCTAATCTAGCATGTATCTGTGCCCTGTGTCAAGTGAGCTAGA	83.2747	121	134	197	161	209	174	181	60.1	106	107	158	119	151	189	242	0.448507	0.538071	0.493289	1.19969
A_55_P2093463	Pon2	paraoxonase 2	ens|ENSMUST00000123838|gb|BC021887|tc|NP427737|tc|TC1648343	paraoxonase 2 [Source:MGI Symbol;Acc:MGI:106687] [ENSMUST00000123838]	GO:0004064(arylesterase activity)|GO:0005576(extracellular region)|GO:0005634(nucleus)|GO:0005739(mitochondrion)|GO:0005764(lysosome)|GO:0005886(plasma membrane)|GO:0016020(membrane)|GO:0016787(hydrolase activity)|GO:0019439(aromatic compound catabolic process)|GO:0042802(identical protein binding)|GO:0043231(intracellular membrane-bounded organelle)|GO:0046872(metal ion binding)	CAAAAACATACTTCATATTTCCTCTTTTATTATATAAATATCAGTTTAACCTTTTGCTGT	102.958	105	124	130	134	194	166	190	80.4	44	122	161	135	150	108	166	0.648387	0.338462	0.493424	0.522005
A_30_P01023458			chr2:35828611-35838083_F	lincRNA:chr2:35828611-35838083 forward strand		TTAAGAGAATGAACCTGTGCTGGATTGGGTGAGCAAGATAAAGGCTGCTTCCTGTCTCTT	73.0425	93.5	60.2	66.5	62.8	88	135	139	33.5	28.7	37.6	59.8	41.9	69.3	139	81.8	0.556478	0.431579	0.494029	0.775554
A_55_P2099110						AATTTCACGTTCCTTTTTCTACTCTTTGGAGGCCCCTGAAGGAGTTATCTCTGGGCTTCA	98.6861	60.8	74.3	82.2	75	92.6	112	140	37.2	40.1	37.1	37.6	45	55.9	120	94.6	0.500673	0.487835	0.494254	0.974358
A_55_P2137496	Cd79a	CD79A antigen (immunoglobulin-associated alpha)	gb|BC027633	Mus musculus CD79A antigen (immunoglobulin-associated alpha), mRNA (cDNA clone MGC:41188 IMAGE:1332396), complete cds. [BC027633]	GO:0004888(transmembrane signaling receptor activity)|GO:0005515(protein binding)|GO:0005771(multivesicular body)|GO:0005886(plasma membrane)|GO:0007166(cell surface receptor signaling pathway)|GO:0009897(external side of plasma membrane)|GO:0016020(membrane)|GO:0016021(integral to membrane)|GO:0019815(B cell receptor complex)|GO:0030183(B cell differentiation)|GO:0042100(B cell proliferation)|GO…	CCTCCTCCCAGATCTGTCATGGCCACTTAAGTGATAATAAATCCTTCCCAAAGCAAAAAA	199.096	228	320	375	271	348	304	355	180	160	197	254	206	283	212	260	0.5625	0.426667	0.494583	0.758519
A_30_P01027423			chr1:107885386-107886798_R	lincRNA:chr1:107885386-107886798 reverse strand		ATAGCTTAAACGAAGTAAGCCTCAGCTACTATCCTCGAGTCTACTGTTCCTGCCTGATCA	111.233	67.4	61.3	75	73.8	76.6	175	160	34.6	32	44.3	60.5	39.4	67.5	194	163	0.564437	0.426667	0.495552	0.755915
A_30_P01020460			chr9:31873801-31874407_F	lincRNA:chr9:31873801-31874407 forward strand		TCTTATTAATGTCACAGGAATCCATTGATGGTTTGACCTATTACTAGAGTCTTTAGGATC	92.2485	77.2	111	110	181	62.8	48.2	37.1	49.5	60	34	35.5	43.6	30.2	37.7	26.3	0.445946	0.545455	0.4957	1.22314
A_30_P01021050			chr12:72103832-72116875_R	lincRNA:chr12:72103832-72116875 reverse strand		CCAGTGAAGTTATATGTTGCCATGTATGGGAAACAAACAAAAGTCATATAAAAGGCTGTA	125.273	160	311	423	271	470	192	253	177	179	248	333	317	382	249	282	0.569132	0.423168	0.49615	0.743532
A_55_P2077488			ens|ENSMUST00000060348|ref|XR_140864|ref|XR_142270|gb|AK017242	RIKEN cDNA 5330417H12 gene [Source:MGI Symbol;Acc:MGI:1923929] [ENSMUST00000060348]		TGCAGCCTTGGCTGGCTCTCCATTACCTCACCCAGAGGATTACAAAAGCTGCCCTTACCA	56.6313	40.7	68.3	76.8	82.4	94.5	110	169	33.5	38.6	64.7	96.2	84	75.6	160	114	0.490483	0.502604	0.496544	1.02471
A_55_P1962571	Gm10286	predicted gene 10286	gb|AK137560|riken|9830141N18	Mus musculus adult male bone cDNA, RIKEN full-length enriched library, clone:9830141N18 product:hypothetical protein, full insert sequence. [AK137560]		AGTACAGGGCCTCTCTATATGCAAAGCCACAAACAGGACCCATGTTCTTCCCTAAGATAA	359.207	397	574	684	1730	2110	2200	2620	248	385	1250	1690	1550	1360	1900	1730	0.432056	0.562865	0.497461	1.30276
A_30_P01026902			chr5:111612191-111652286_F	lincRNA:chr5:111612191-111652286 forward strand		AGAGCTGAGTGACTATGCAGCCCAAGGCCGTGCCTATGGAAACATGGGCAACGCCTACAA	93.9587	78	77.9	62.1	73.8	73.6	72.7	100	41.5	28.8	92	49.3	41.8	49	140	71.3	0.532734	0.463768	0.498251	0.870543
A_30_P01028973			chr9:4260788-4261404_F	lincRNA:chr9:4260788-4261404 forward strand		CAAAAAGCGCTGTGGCTGGGAGTCAGCTACAGCTCTTATAGGGGCAGGCAGCCTTTTGCT	273.521	276	202	229	234	265	202	178	107	107	145	145	157	154	170	144	0.529703	0.467249	0.498476	0.882096
A_51_P300867	Map3k9	mitogen-activated protein kinase kinase kinase 9	ref|NM_177395|gb|AK053843|tc|TC1589693|riken|E130314H24	Mus musculus mitogen-activated protein kinase kinase kinase 9 (Map3k9), transcript variant 2, mRNA [NM_177395]	GO:0000166(nucleotide binding)|GO:0004672(protein kinase activity)|GO:0004674(protein serine/threonine kinase activity)|GO:0004709(MAP kinase kinase kinase activity)|GO:0004713(protein tyrosine kinase activity)|GO:0005524(ATP binding)|GO:0006351(transcription, DNA-dependent)|GO:0006355(regulation of transcription, DNA-dependent)|GO:0006468(protein phosphorylation)|GO:0006915(apoptotic process)|GO…	ATATGTTTGGAAAAGTATACAGGTTTATTGTTTTATTTTCTAAGATGGGCTGGGCTAGCC	67.6871	78.6	55.8	73.2	52.5	50.3	87.5	72.4	33.4	29.2	37.7	27.5	25.9	46.9	63.1	48	0.598566	0.398907	0.498737	0.666438
A_30_P01018439			chr3:93582250-93592950_F	lincRNA:chr3:93582250-93592950 forward strand		AATTCAGTGTACACCCAAGACTAGATGATGCCTGATTCCTCCTCTTCCTCTGTCTCTGAA	627.003	789	983	1680	1200	1560	1430	1550	646	572	1230	1580	1010	1130	900	977	0.657172	0.340476	0.498824	0.518093
A_51_P228865	Zfp72	zinc finger protein 72	ref|NM_001081680|ens|ENSMUST00000091481|gb|BC118036|gb|BC118046	Mus musculus zinc finger protein 72 (Zfp72), mRNA [NM_001081680]	GO:0003674(molecular_function)|GO:0005575(cellular_component)|GO:0008150(biological_process)|GO:0046872(metal ion binding)	TTTTCAGCCCTTATTCAACACCAAAGAATTCATACTGGAGAGAAACCCTACAAGTGTGAA	983.139	1700	749	965	808	1140	830	1120	505	313	633	900	927	952	809	901	0.674232	0.324352	0.499292	0.481069
A_51_P211854	Selp	selectin, platelet	ref|NM_011347|ens|ENSMUST00000161020|ens|ENSMUST00000162746|gb|M87861	Mus musculus selectin, platelet (Selp), mRNA [NM_011347]	GO:0001530(lipopolysaccharide binding)|GO:0001948(glycoprotein binding)|GO:0002687(positive regulation of leukocyte migration)|GO:0002691(regulation of cellular extravasation)|GO:0005515(protein binding)|GO:0005615(extracellular space)|GO:0005634(nucleus)|GO:0005737(cytoplasm)|GO:0006954(inflammatory response)|GO:0007155(cell adhesion)|GO:0007157(heterophilic cell-cell adhesion)|GO:0007159(leukoc…	ATGCCTGCTTTAAGATCTCCTGGGTCTTCCATGTTTCATATCAATGAGGTTGTTTACACC	98.2767	121	213	277	385	489	591	744	110	134	373	468	376	327	529	472	0.516432	0.483755	0.500093	0.936725
A_30_P01032176			chr3:36280098-36347798_R	lincRNA:chr3:36280098-36347798 reverse strand		TAAAATTTCAGTGTGTTCGAGTTTGCTTGTAACTCTGCTCTTTACCTTCTCCTCCTCCTC	134.113	120	184	203	198	245	442	502	106	86.2	151	182	159	149	485	325	0.576087	0.424631	0.500359	0.737095
A_55_P2064731	Npbwr1	neuropeptides B/W receptor 1	ref|NM_010342|ens|ENSMUST00000044180|gb|AK138357|riken|A230077K02	Mus musculus neuropeptides B/W receptor 1 (Npbwr1), mRNA [NM_010342]	GO:0004871(signal transducer activity)|GO:0004930(G-protein coupled receptor activity)|GO:0005886(plasma membrane)|GO:0007165(signal transduction)|GO:0007186(G-protein coupled receptor signaling pathway)|GO:0008188(neuropeptide receptor activity)|GO:0016020(membrane)|GO:0016021(integral to membrane)|GO:0019222(regulation of metabolic process)	TTTCCTCTATGCCTTCCTGGACGACAGCTTCCGCAGAAGCCTCCGGCAATTGGTGTCATG	35.8781	52.6	55.8	72.1	56	54.3	130	113	35.8	26	33	47	28.2	41.4	107	72.5	0.641577	0.36061	0.501094	0.562069
A_51_P211854	Selp	selectin, platelet	ref|NM_011347|ens|ENSMUST00000161020|ens|ENSMUST00000162746|gb|M87861	Mus musculus selectin, platelet (Selp), mRNA [NM_011347]	GO:0001530(lipopolysaccharide binding)|GO:0001948(glycoprotein binding)|GO:0002687(positive regulation of leukocyte migration)|GO:0002691(regulation of cellular extravasation)|GO:0005515(protein binding)|GO:0005615(extracellular space)|GO:0005634(nucleus)|GO:0005737(cytoplasm)|GO:0006954(inflammatory response)|GO:0007155(cell adhesion)|GO:0007157(heterophilic cell-cell adhesion)|GO:0007159(leukoc…	ATGCCTGCTTTAAGATCTCCTGGGTCTTCCATGTTTCATATCAATGAGGTTGTTTACACC	114.923	180	194	489	517	509	634	788	129	165	384	402	411	332	515	485	0.664948	0.337423	0.501186	0.507443
A_30_P01024542			chr14:27176652-27227602_F	lincRNA:chr14:27176652-27227602 forward strand		CAATCCACCCTCTGGACATTCTATTGTATCCTGGAGATGCCTTGGACTTCTCTGTGATGT	38.9656	48.2	66	68.8	67.4	59.9	147	167	20.9	47.2	34.4	47.3	33.6	33.2	178	96.9	0.316667	0.686047	0.501357	2.16646
A_30_P01020815			chr13:108548345-108679004_R	lincRNA:chr13:108548345-108679004 reverse strand		TGAAACTGTTCTTTCCAGTCCCCAAGTTCACACTCCTTTACCTTACCTGTTGGCTGTTTG	352.096	406	473	518	369	459	422	451	259	236	283	347	319	333	398	358	0.547569	0.455598	0.501584	0.832039
A_55_P2092611	Slc45a3	solute carrier family 45, member 3	ref|NM_145977|ref|NM_001177628|ens|ENSMUST00000177943|ens|ENSMUST00000027695	Mus musculus solute carrier family 45, member 3 (Slc45a3), transcript variant 1, mRNA [NM_145977]	GO:0003674(molecular_function)|GO:0005575(cellular_component)|GO:0006810(transport)|GO:0008150(biological_process)|GO:0016020(membrane)|GO:0016021(integral to membrane)|GO:0055085(transmembrane transport)	AGTCTCCCACCCCCCACTTGTTTCAGGAAATGGCTCAGCTTGTTGGCCACAGAGACACAG	3361.96	4290	7430	5310	4850	6030	4610	5010	2990	3190	4190	4510	4990	4370	2970	3890	0.402423	0.600753	0.501588	1.49284
A_52_P117294	Fryl	furry homolog-like (Drosophila)	ens|ENSMUST00000153923|gb|AK036035|tc|TC1589574|riken|9630028K15	furry homolog-like (Drosophila) [Source:MGI Symbol;Acc:MGI:1919563] [ENSMUST00000153923]	GO:0005515(protein binding)|GO:0005575(cellular_component)|GO:0008150(biological_process)	AAATGTGTCTCCTTAACAAACGCAACGAGTCATAAAGTATTTCTGAAGCATCCGAAGAGT	95.6572	120	102	121	86.7	93.3	100	123	54.3	57	78.4	86.1	78.6	82.4	66.9	64.4	0.532353	0.471074	0.501714	0.884891
A_52_P384036	Agbl2	ATP/GTP binding protein-like 2	ens|ENSMUST00000051831|ens|ENSMUST00000149037|gb|AK029744|gb|DQ867028	ATP/GTP binding protein-like 2 [Source:MGI Symbol;Acc:MGI:2443254] [ENSMUST00000051831]	GO:0004180(carboxypeptidase activity)|GO:0004181(metallocarboxypeptidase activity)|GO:0005737(cytoplasm)|GO:0005829(cytosol)|GO:0006508(proteolysis)|GO:0008233(peptidase activity)|GO:0008237(metallopeptidase activity)|GO:0008270(zinc ion binding)|GO:0016787(hydrolase activity)|GO:0046872(metal ion binding)	AGGGACACATCTTCAAACAATGTAAAGGAAGGTCACCCCAATATCTCTCTCTTTCAGTCC	128.491	137	129	192	174	240	233	207	92.7	54.7	93.3	149	123	162	110	129	0.718605	0.284896	0.50175	0.396457
A_52_P42194	Svil	supervillin	ens|ENSMUST00000131210|gb|AK041925|tc|TC1591591|riken|A630047D06	supervillin [Source:MGI Symbol;Acc:MGI:2147319] [ENSMUST00000131210]	GO:0003779(actin binding)|GO:0005634(nucleus)|GO:0005737(cytoplasm)|GO:0005856(cytoskeleton)|GO:0005886(plasma membrane)|GO:0007010(cytoskeleton organization)|GO:0007519(skeletal muscle tissue development)|GO:0015629(actin cytoskeleton)|GO:0016020(membrane)|GO:0030054(cell junction)|GO:0042995(cell projection)|GO:0043034(costamere)|GO:0051015(actin filament binding)	CCCTTAGCTTTGATTAAAATTAAGAGGTTTGTTCAGTGAACAACATGGAACAGCTGTTTT	54.6762	84.2	52.3	72.3	25.1	25.5	14.1	41.1	25.6	37.2	21.5	20.1	30.3	22.5	6.83	13.3	0.489484	0.514523	0.502003	1.05115
A_55_P1983363	C86187	expressed sequence C86187	ref|NR_015609|gb|AK135966|gb|AK135845|gb|BB703401	Mus musculus expressed sequence C86187 (C86187), long non-coding RNA [NR_015609]		TTAGAATGTTAGATCAAACGCCACCTGGTCATATTCATTTTCCCCATCCTTCCAAATCCA	51.8446	150	149	70.8	70.5	73.3	157	110	53	45.9	68.8	70.4	74.1	64.5	150	105	0.355705	0.648305	0.502005	1.82259
A_51_P329811	Reg1	regenerating islet-derived 1	ref|NM_009042|ens|ENSMUST00000079926|gb|AK075798|gb|AK133506	Mus musculus regenerating islet-derived 1 (Reg1), mRNA [NM_009042]	GO:0005576(extracellular region)|GO:0008083(growth factor activity)|GO:0030246(carbohydrate binding)	GGACCATCTATCAAAAGCAAATTAGATCCTGTCTTCCTGGAGAGACATTCTTGCTTCACT	38.5258	32.7	104	88	134	246	234	288	57.9	39.4	160	175	250	152	211	193	0.556731	0.447727	0.502229	0.804208
A_51_P470304	Nkx1-2	NK1 transcription factor related, locus 2 (Drosophila)	ref|NM_009123|gb|X75384|gb|BC139757|gb|AF222444	Mus musculus NK1 transcription factor related, locus 2 (Drosophila) (Nkx1-2), mRNA [NM_009123]	GO:0003677(DNA binding)|GO:0003700(sequence-specific DNA binding transcription factor activity)|GO:0005515(protein binding)|GO:0005575(cellular_component)|GO:0005634(nucleus)|GO:0006355(regulation of transcription, DNA-dependent)|GO:0007275(multicellular organismal development)|GO:0043565(sequence-specific DNA binding)	GACCTCATTCTTCCCTTTGATTTACTTCGAGGGCTCTGTTCTTTACCGTGTCTGGCTAAT	41.6041	60	90	106	106	144	295	318	32.7	68	65	96.4	81.6	122	303	199	0.363333	0.641509	0.502421	1.76562
A_55_P2137319						TTAGTCATTCTTAATCTGGAGATTGTGCCCATCTGTGTGTGTTTATCCCACCACACTCCC	96.3412	160	144	121	95.3	154	146	158	47.6	81.8	82.4	122	119	133	175	170	0.330556	0.676033	0.503294	2.04514
A_30_P01031306			chr14:52874069-52877398_R	lincRNA:chr14:52874069-52877398 reverse strand		GGGATATAACTTGGTAGAGTGATTGCTGAGCATATACATACAATGGGTTAAATTCCAATA	82.9357	109	110	152	85.1	136	73.1	98.3	54.1	78.4	81.5	99.2	115	134	88.2	87	0.491818	0.515789	0.503804	1.04874
A_55_P1991560	Lilra5	leukocyte immunoglobulin-like receptor, subfamily A (with TM domain), member 5	ref|NM_001081239|ens|ENSMUST00000117550|gb|AK086983|tc|TC1618146	Mus musculus leukocyte immunoglobulin-like receptor, subfamily A (with TM domain), member 5 (Lilra5), mRNA [NM_001081239]	GO:0003674(molecular_function)|GO:0005575(cellular_component)|GO:0008150(biological_process)	GGAACCTGAACATTCTATGGAAAGAAGAGATACTATTGTCTTCCTGAGTTAAAATTTGAC	52.9137	80.8	120	143	248	367	346	475	70.4	60.3	197	293	305	203	292	266	0.586667	0.421678	0.504172	0.71877
A_30_P01029095			chr3:151746091-151753763_R	lincRNA:chr3:151746091-151753763 reverse strand		TCTGTGGGTGATTTCTGTAGGATGGTGTCTGTGGGTGATTTCTGTAGGATGGTGTCTGTG	69.341	115	87.7	135	84.7	171	156	189	33.5	84.6	76.9	121	87.7	121	165	174	0.381984	0.626667	0.504325	1.64056
A_51_P467668	Ick	intestinal cell kinase	ref|NM_019987|ref|NM_001163780|ens|ENSMUST00000118869|ens|ENSMUST00000142402	Mus musculus intestinal cell kinase (Ick), transcript variant 2, mRNA [NM_019987]	GO:0000166(nucleotide binding)|GO:0000287(magnesium ion binding)|GO:0004672(protein kinase activity)|GO:0004674(protein serine/threonine kinase activity)|GO:0004693(cyclin-dependent protein kinase activity)|GO:0005524(ATP binding)|GO:0005737(cytoplasm)|GO:0006468(protein phosphorylation)|GO:0007165(signal transduction)|GO:0007243(intracellular protein kinase cascade)|GO:0007275(multicellular orga…	AGCTCTAGTGGACTGACTGGAAGCTACATCCCTTCCTTTCTGAAAAAGGAAATCGGTTCT	255.257	360	433	420	214	310	228	254	240	191	202	240	232	214	156	178	0.554273	0.454762	0.504517	0.820466
A_55_P2079841						TCCTCTAGTATTTCACCTCCCCTTAAGACAACATGTTGTTTTATTTCCTTGAAAACATAA	46.1062	41.5	62.9	55.4	81.2	65.4	69.7	82.8	35.9	24.3	46.7	53.7	59.3	57.6	93.4	65.3	0.570747	0.438628	0.504688	0.768516
A_30_P01029435			chr6:99472981-99484210_F	lincRNA:chr6:99472981-99484210 forward strand		CTTTGCCCTCAGCACACCTGGGCATCCTGACACAGAAAAGAAAGGGATGCAAAAATAATT	16.9113	21	51	56.2	24.8	42.8	52.4	80.3	26.6	27.5	34	34.2	37	46	68.6	41.1	0.521569	0.489324	0.505446	0.938177
A_52_P377492	Olfr1122	olfactory receptor 1122	ref|NM_147031|ens|ENSMUST00000056435|gb|BC119331|tc|NP646607	Mus musculus olfactory receptor 1122 (Olfr1122), mRNA [NM_147031]	GO:0004871(signal transducer activity)|GO:0004930(G-protein coupled receptor activity)|GO:0004984(olfactory receptor activity)|GO:0005886(plasma membrane)|GO:0007165(signal transduction)|GO:0007186(G-protein coupled receptor signaling pathway)|GO:0007608(sensory perception of smell)|GO:0016020(membrane)|GO:0016021(integral to membrane)|GO:0050896(response to stimulus)|GO:0050911(detection of chem…	CTTGTGGCTGCTTGCTGGATCTGCATTATTCCAGTTGTGACTGGACAAACTTACCAGATT	69.0253	80.7	51.4	80.3	63.2	93.2	93	96.9	21.9	47	32.2	59.4	37.8	55.5	118	67.4	0.42607	0.585305	0.505688	1.37373
A_30_P01021112			chr8:49853937-49874087_R	lincRNA:chr8:49853937-49874087 reverse strand		TTCCTTATGTGTCATCATCTTAATAATACCCTCAAGTCGCTTTGCTCCTGGAGCTCTGAT	130.566	104	190	150	307	239	174	370	91.9	79.6	151	161	184	133	289	171	0.483684	0.530667	0.507175	1.09713
A_55_P2278965	5430420F09Rik	RIKEN cDNA 5430420F09 gene	gb|AK017326|riken|5430420F09|nap|NAP073671-1	Mus musculus 6 days neonate head cDNA, RIKEN full-length enriched library, clone:5430420F09 product:unclassifiable, full insert sequence. [AK017326]		TACTTATTTTCAGGAAAGACCTCCTGTGTACTAGGCAAATGTTTTGTCACTACCCTCTAC	60.6446	95.7	101	133	77.9	77	93.2	112	59.4	56.8	50.2	64.6	43.9	47	73.8	45.3	0.588119	0.427068	0.507593	0.726159
A_30_P01027041			chr9:4260788-4261404_F	lincRNA:chr9:4260788-4261404 forward strand		GCTTAGACCAGTGGTTAGAACAGCTGAACTAGAGTAAGCAGCCACTGTGCAGCTTAGCTC	212.716	263	171	235	210	271	138	178	94.3	109	157	135	140	156	163	144	0.551462	0.46383	0.507646	0.841091
A_30_P01022321			chr9:24307857-24309318_F	lincRNA:chr9:24307857-24309318 forward strand		GCTCTGGCTTCTATTGCTCACGACTTTATTAATATGAGCATTCATTAACTCAGGCACAAA	54.3026	70.9	66.4	93.7	71.2	96.8	134	148	34.6	46.4	57.3	322	86.1	72.8	141	169	0.521084	0.495197	0.508141	0.950321
A_55_P2138100			ens|ENSMUST00000099050|ens|ENSMUST00000099049|ens|ENSMUST00000178077|ens|ENSMUST00000143083	predicted gene 10720 [Source:MGI Symbol;Acc:MGI:3641687] [ENSMUST00000099050]		CAGTTTTCTCGCCATATTCCAGGTCCTACAGTGTGCATTTCTCATTTTTTCAGGTTTTTC	570.964	728	953	1240	642	892	1110	1250	537	562	622	726	728	917	616	759	0.563484	0.453226	0.508355	0.804328
A_55_P2106345	Arid4b	AT rich interactive domain 4B (RBP1-like)	gb|AK161669|ens|ENSMUST00000110533|riken|5730472C19	Mus musculus 8 days embryo whole body cDNA, RIKEN full-length enriched library, clone:5730472C19 product:hypothetical protein, full insert sequence. [AK161669]	GO:0003677(DNA binding)|GO:0005515(protein binding)|GO:0005575(cellular_component)|GO:0005622(intracellular)|GO:0005634(nucleus)|GO:0006349(regulation of gene expression by genetic imprinting)|GO:0006351(transcription, DNA-dependent)|GO:0006355(regulation of transcription, DNA-dependent)|GO:0034773(histone H4-K20 trimethylation)|GO:0036124(histone H3-K9 trimethylation)	GCTTAGAAACTTAGTAAAGATTGGGATTTTTACTTGAGGGATGTCGATCCATTTAGCTTT	58.2978	81.9	78.9	107	90.2	102	70.4	95.2	45.2	47.5	71.6	72.1	55.3	59.3	81.9	42.3	0.572877	0.443925	0.508401	0.774905
A_30_P01024979			chr19:12079745-12088620_F	lincRNA:chr19:12079745-12088620 forward strand		AAACCCAGCCGCATGACGTCTGTACTCATTCTTATAAATTGCCCCCTTCAAATAAGGGTA	187.809	184	348	536	404	417	349	383	228	194	329	308	321	301	397	286	0.655172	0.36194	0.508556	0.552435
A_55_P2186282	Agxt2	alanine-glyoxylate aminotransferase 2	ref|NM_001031851|ens|ENSMUST00000022858|gb|BC141248|gb|BC145576	Mus musculus alanine-glyoxylate aminotransferase 2 (Agxt2), mRNA [NM_001031851]	GO:0003824(catalytic activity)|GO:0005739(mitochondrion)|GO:0008453(alanine-glyoxylate transaminase activity)|GO:0008483(transaminase activity)|GO:0009436(glyoxylate catabolic process)|GO:0016223(beta-alanine-pyruvate transaminase activity)|GO:0016740(transferase activity)|GO:0019265(glycine biosynthetic process, by transamination of glyoxylate)|GO:0019481(L-alanine catabolic process, by transami…	TAAAAGACATGACCGACTATCTATCTACTGACCGTATTTGTCAACGGAGCCCCCATTCTC	83.1673	38.5	166	101	135	91.3	120	128	87.8	49.4	76.7	67.7	72.6	72.9	128	120	0.528916	0.489109	0.509012	0.924739
A_30_P01029571			chr17:8025086-8026227_R	lincRNA:chr17:8025086-8026227 reverse strand		TGGCTGTGCTGTTTACTGACTGAATAAATATACAAACCCTTTGTCTCTTCTACCTCTGCG	145.379	173	156	189	171	187	221	302	74.7	102	119	169	140	151	268	228	0.478846	0.539683	0.509264	1.12705
A_30_P01021405			chr12:17438940-17439119_F	lincRNA:chr12:17438940-17439119 forward strand		TCTCCTGCCCTGTCACAAATGACTGAGTGGGATGGAATTGAACATTCAACTTTCTACTTT	537.515	577	369	438	309	354	361	380	195	215	221	261	184	231	381	333	0.528455	0.490868	0.509661	0.928872
A_55_P2169129						GCCCTTCCTCAAGCTCTGCCGTCAGCTTGATACCTGAGAAAATAAATGGAGGAAATCTTA	193.402	207	273	276	243	267	308	350	131	149	168	196	166	187	256	234	0.479853	0.539855	0.509854	1.12504
A_30_P01019719			chr17:15357376-15385701_R	lincRNA:chr17:15357376-15385701 reverse strand		GCTCTCTCTGTAGGCCACATTGACTATCTGTATTCATTCCTTATTTTCAAAATCATACCT	61.6728	63.2	65.5	60.6	77.7	96.4	88.9	115	33.4	30.9	38.6	55	43.1	63.1	79.5	83.2	0.509924	0.509901	0.509912	0.999956
A_52_P337246	Isl1	ISL1 transcription factor, LIM/homeodomain	ref|NM_021459|ens|ENSMUST00000036060|gb|AK090263|tc|TC1577771	Mus musculus ISL1 transcription factor, LIM/homeodomain (Isl1), mRNA [NM_021459]	GO:0000122(negative regulation of transcription from RNA polymerase II promoter)|GO:0001102(RNA polymerase II activating transcription factor binding)|GO:0001105(RNA polymerase II transcription coactivator activity)|GO:0001158(enhancer sequence-specific DNA binding)|GO:0001755(neural crest cell migration)|GO:0003007(heart morphogenesis)|GO:0003139(secondary heart field specification)|GO:0003148(o…	CCCCCAAAGATGTGTATAGTTATTGGTTAAAATGACTGTTTTCGCTCTTTCTGGAAATAA	55.9436	48.5	183	184	176	244	116	133	74.3	113	46.4	57	87.7	75.7	214	161	0.406011	0.61413	0.510071	1.5126
A_55_P2159309	Synpo2	synaptopodin 2	ref|NM_080451|gb|BC158045|ens|ENSMUST00000106426|ens|ENSMUST00000106427	Mus musculus synaptopodin 2 (Synpo2), mRNA [NM_080451]	GO:0003779(actin binding)|GO:0005515(protein binding)|GO:0005634(nucleus)|GO:0005737(cytoplasm)|GO:0015629(actin cytoskeleton)|GO:0030018(Z disc)|GO:0051371(muscle alpha-actinin binding)|GO:0071889(14-3-3 protein binding)	GATATAACATGCATTTGCCATTTACCTTGTTCAAATCCACCTGTCAGCCCATTGCCTGTC	51.4755	65.2	61	54.8	70.5	80	195	156	18.9	39	53.8	49.2	69.7	77.9	198	145	0.309836	0.711679	0.510757	2.29695
A_55_P2106715	Taar5	trace amine-associated receptor 5	ref|NM_001009574|ens|ENSMUST00000092659|gb|BC139188|gb|BC139191	Mus musculus trace amine-associated receptor 5 (Taar5), mRNA [NM_001009574]	GO:0001594(trace-amine receptor activity)|GO:0004871(signal transducer activity)|GO:0004888(transmembrane signaling receptor activity)|GO:0004930(G-protein coupled receptor activity)|GO:0005886(plasma membrane)|GO:0005887(integral to plasma membrane)|GO:0007165(signal transduction)|GO:0007166(cell surface receptor signaling pathway)|GO:0007186(G-protein coupled receptor signaling pathway)|GO:0007…	ATTTCAATTCAGCCTGTAATCCCATCATCTACGTCTTCTCCTACCGGTGGTTTAGGAAGG	45.5086	79.7	75.5	61	62.1	289	131	129	27.9	39.8	44.8	57.1	51.8	52.4	144	110	0.369536	0.652459	0.510998	1.76561
A_30_P01027169			chr16:29711373-29712035_R	lincRNA:chr16:29711373-29712035 reverse strand		ATGAGCCTGCTATTCTATCCTCATTCTCAAATGACAATCTCTCTGGTCCTCACAAGAGAC	23.9297	12.6	62.6	61.8	45	73.1	191	123	41.6	22.1	34.1	40	46	72.2	148	85	0.664537	0.357605	0.511071	0.538127
A_55_P2017389						TTTGAGCCTCATTCAGGAGAGGATTTATACATGAGATGAAGACCACATCGCCTGGATCAT	192.158	379	309	357	215	270	199	234	180	157	162	200	182	178	144	139	0.582524	0.439776	0.51115	0.754949
A_55_P2045896	Gdnf	glial cell line derived neurotrophic factor	ref|NM_010275|ens|ENSMUST00000022744|gb|U37459|gb|U66196	Mus musculus glial cell line derived neurotrophic factor (Gdnf), mRNA [NM_010275]	GO:0001656(metanephros development)|GO:0001657(ureteric bud development)|GO:0001658(branching involved in ureteric bud morphogenesis)|GO:0001755(neural crest cell migration)|GO:0001759(organ induction)|GO:0001941(postsynaptic membrane organization)|GO:0005160(transforming growth factor beta receptor binding)|GO:0005576(extracellular region)|GO:0005615(extracellular space)|GO:0007169(transmembrane…	CTGATGTCTCGGTCGTTTGTGTTATACAACCAAAGTTCTCTACAAACTTTATTTTTGTAC	41.572	65.1	102	143	87.6	106	49.1	56.6	52.9	72.1	34.1	69.7	61.3	62.5	156	98.5	0.518627	0.504196	0.511412	0.972173
A_51_P211854	Selp	selectin, platelet	ref|NM_011347|ens|ENSMUST00000161020|ens|ENSMUST00000162746|gb|M87861	Mus musculus selectin, platelet (Selp), mRNA [NM_011347]	GO:0001530(lipopolysaccharide binding)|GO:0001948(glycoprotein binding)|GO:0002687(positive regulation of leukocyte migration)|GO:0002691(regulation of cellular extravasation)|GO:0005515(protein binding)|GO:0005615(extracellular space)|GO:0005634(nucleus)|GO:0005737(cytoplasm)|GO:0006954(inflammatory response)|GO:0007155(cell adhesion)|GO:0007157(heterophilic cell-cell adhesion)|GO:0007159(leukoc…	ATGCCTGCTTTAAGATCTCCTGGGTCTTCCATGTTTCATATCAATGAGGTTGTTTACACC	152.312	156	236	264	430	509	606	719	137	117	350	410	355	385	455	454	0.580508	0.443182	0.511845	0.763437
A_55_P2169559	Tnfrsf13b	tumor necrosis factor receptor superfamily, member 13b	ref|NM_021349|ens|ENSMUST00000139422|ens|ENSMUST00000101103|gb|AF257673	Mus musculus tumor necrosis factor receptor superfamily, member 13b (Tnfrsf13b), mRNA [NM_021349]	GO:0001782(B cell homeostasis)|GO:0005887(integral to plasma membrane)|GO:0009897(external side of plasma membrane)|GO:0016020(membrane)|GO:0016021(integral to membrane)|GO:0030889(negative regulation of B cell proliferation)	TCAGCTGTGACTCCACCTGCACACAGCACCCTCAGCAGTGTGCCCACTTCTGTGAGAAAA	51.7632	83	90.6	134	92.2	127	140	165	60.6	47.6	86	91.7	80.9	77.8	136	75.6	0.668874	0.355224	0.512049	0.531077
A_30_P01033221			chr3:95443575-95462543_F	lincRNA:chr3:95443575-95462543 forward strand		CTTAGCTTGGACTTACTTTACCTCTAAATTCGCTACATTTCTGTGCCTGCTTTTCTCCTG	48.7381	37.2	58.5	92.8	79.3	84.1	218	121	37.1	36.2	46.5	43.5	50.7	63.5	156	147	0.634188	0.390086	0.512137	0.615096
A_30_P01017541			chr1:58443698-58449898_F	lincRNA:chr1:58443698-58449898 forward strand		TTTAAACGTGTTCGACATTGCTCTTTCTAGGCCTCTCAAACATTCTGAAGCCACGAAGCC	45.203	31.7	98	84	130	155	124	145	63.3	31.8	96.4	147	126	124	154	109	0.645918	0.378571	0.512245	0.586098
A_30_P01024295			chr16:8738782-8830148_F	lincRNA:chr16:8738782-8830148 forward strand		TTTCAAGTGAATTCTGGAAGTTCTGGCTTTCTCCATCATCGGTCCCCAATTCAACCCTCA	21.6745	65	65.3	71.3	89.8	90.2	139	235	31	39.2	49	63.1	65	78.8	247	165	0.474732	0.54979	0.512261	1.15811
A_55_P2040250	Raph1	Ras association (RalGDS/AF-6) and pleckstrin homology domains 1	ens|ENSMUST00000090293	Ras association (RalGDS/AF-6) and pleckstrin homology domains 1 [Source:MGI Symbol;Acc:MGI:1924550] [ENSMUST00000090293]	GO:0005515(protein binding)|GO:0031252(cell leading edge)|GO:0048675(axon extension)	GACATTGTCTGTCTTTATAATCACCAACTACTGCATCCTCTTTATGCATGTCCTGAATTC	41.7031	47.1	71.7	89.8	70.9	76.3	84.8	75.1	52.1	26.8	31.2	63.9	46.8	47.5	72.3	58.1	0.726639	0.298441	0.51254	0.410714
A_30_P01022244			chr1:90912687-90918785_F	lincRNA:chr1:90912687-90918785 forward strand		TCAAAAAACATCTGTCTTTCTTCGTCTCCCTTTTGGTTTCGACCTCCTGAAGTGCACGAG	116.696	91.2	146	182	134	157	233	257	87.7	77.3	88.1	115	117	136	259	182	0.600685	0.424725	0.512705	0.707068
A_55_P2262206	Tbck	TBC1 domain containing kinase	gb|AK085971|riken|D830035P19	Mus musculus 16 days neonate heart cDNA, RIKEN full-length enriched library, clone:D830035P19 product:Hypothetical leucine-rich region containing protein, full insert sequence. [AK085971]	GO:0004672(protein kinase activity)|GO:0005097(Rab GTPase activator activity)|GO:0005524(ATP binding)|GO:0005575(cellular_component)|GO:0006468(protein phosphorylation)|GO:0016772(transferase activity, transferring phosphorus-containing groups)|GO:0032313(regulation of Rab GTPase activity)	CAAAAATATCAGTTTTCTGTTCAAACAAAATCTCTTCTGAGACTCCAAACTGTGAGCTCC	77.444	85.4	78.6	103	105	88.5	77.6	63.7	54.9	33.7	50	51.9	67.4	47.7	69.5	47	0.698473	0.327184	0.512829	0.468428
A_30_P01024102			chr8:72663625-72673010_R	lincRNA:chr8:72663625-72673010 reverse strand		GAATCAGTAGGCAGCAGGCACTGGCCACTTGCTAGGTCTTCAGTTCTTGGTGAGTCTTCA	245.95	165	275	359	268	283	364	439	146	178	137	162	154	193	491	347	0.530909	0.495822	0.513365	0.933911
A_30_P01021518			chr6:100162756-100178531_F	lincRNA:chr6:100162756-100178531 forward strand		AAGGTTAGTCCTACTGAGCTGAGCTACATGGCTTGGGCAGCGTCAGTGATGGTGGGACTC	56.5204	44.7	56.1	60.9	16.8	21.4	12.2	15.7	28.9	31.2	4.07	7.15	8.8	14	15.8	21.4	0.515152	0.512315	0.513733	0.994494
A_52_P237973	Olfr170	olfactory receptor 170	ref|NM_146957|ens|ENSMUST00000078603|gb|BC132585|gb|BC132587	Mus musculus olfactory receptor 170 (Olfr170), mRNA [NM_146957]	GO:0004871(signal transducer activity)|GO:0004930(G-protein coupled receptor activity)|GO:0004984(olfactory receptor activity)|GO:0005886(plasma membrane)|GO:0007165(signal transduction)|GO:0007186(G-protein coupled receptor signaling pathway)|GO:0007608(sensory perception of smell)|GO:0016020(membrane)|GO:0016021(integral to membrane)|GO:0050896(response to stimulus)|GO:0050911(detection of chem…	CCAGTCATTTTCACATATATGAGACCTCGCTCATACCACACTCCAGGGCAGGATAAGTTT	65.7172	54.7	94.3	94.8	120	105	109	123	48	49.2	57.5	66.7	57.6	61.5	175	80.9	0.509014	0.518987	0.514001	1.01959
A_51_P123314	Olfr74	olfactory receptor 74	ref|NM_054091|ens|ENSMUST00000099840|gb|AB061229|gb|BC140281	Mus musculus olfactory receptor 74 (Olfr74), mRNA [NM_054091]	GO:0004871(signal transducer activity)|GO:0004930(G-protein coupled receptor activity)|GO:0004984(olfactory receptor activity)|GO:0005549(odorant binding)|GO:0005886(plasma membrane)|GO:0005887(integral to plasma membrane)|GO:0007165(signal transduction)|GO:0007186(G-protein coupled receptor signaling pathway)|GO:0007608(sensory perception of smell)|GO:0016020(membrane)|GO:0016021(integral to mem…	TCTTGGGCTTCTCAGATTATCCTGACCTTAAAGTCCCTCTCTTCTTGGTGTTTCTCGTCA	247.499	236	228	233	242	281	410	525	135	102	150	166	131	172	479	412	0.592105	0.437768	0.514937	0.739342
A_52_P357829	Gli2	GLI-Kruppel family member GLI2	ref|NM_001081125|ens|ENSMUST00000062483|gb|AK078489|gb|BC085190	Mus musculus GLI-Kruppel family member GLI2 (Gli2), mRNA [NM_001081125]	GO:0000122(negative regulation of transcription from RNA polymerase II promoter)|GO:0001501(skeletal system development)|GO:0001649(osteoblast differentiation)|GO:0001701(in utero embryonic development)|GO:0001822(kidney development)|GO:0002009(morphogenesis of an epithelium)|GO:0002062(chondrocyte differentiation)|GO:0002076(osteoblast development)|GO:0003676(nucleic acid binding)|GO:0003677(DNA…	AGGCATTGATTCTTGGACTTTGAGGAACTCTTAACTGAATTTGCTTGTTCAGTATGGCCT	68.2422	58.1	79.1	96	71.8	84.4	69.2	77.8	48.5	40.1	57.9	81.3	97.1	96.1	71.4	77.7	0.613148	0.417708	0.515428	0.681252
A_52_P359958	Osbpl6	oxysterol binding protein-like 6	ref|NM_145525|ens|ENSMUST00000111930|ens|ENSMUST00000077972|ens|ENSMUST00000111929	Mus musculus oxysterol binding protein-like 6 (Osbpl6), mRNA [NM_145525]	GO:0003674(molecular_function)|GO:0005829(cytosol)|GO:0005886(plasma membrane)|GO:0006810(transport)|GO:0006869(lipid transport)|GO:0008150(biological_process)|GO:0008289(lipid binding)|GO:0031965(nuclear membrane)|GO:0097038(perinuclear endoplasmic reticulum)	TTGCAAACTCACGTTTGTCAAGGTGAATTACTGGAACTCCAACGTGAATGAAGTCCAGGG	141.958	195	308	202	201	252	172	206	156	106	174	181	150	144	132	140	0.506494	0.524752	0.515623	1.03605
A_55_P2076683	Sort1	sortilin 1	ref|NM_001271599|ens|ENSMUST00000129755|ens|ENSMUST00000135636|gb|AK179187	Mus musculus sortilin 1 (Sort1), transcript variant 1, mRNA [NM_001271599]	GO:0001503(ossification)|GO:0005515(protein binding)|GO:0005634(nucleus)|GO:0005737(cytoplasm)|GO:0005764(lysosome)|GO:0005768(endosome)|GO:0005769(early endosome)|GO:0005783(endoplasmic reticulum)|GO:0005794(Golgi apparatus)|GO:0005886(plasma membrane)|GO:0005905(coated pit)|GO:0006810(transport)|GO:0006895(Golgi to endosome transport)|GO:0006897(endocytosis)|GO:0007186(G-protein coupled recepto…	GGGACACAGCTTGTCCCAGAATCCAGCTCCGCCTCCTCTTGGATACACTGAAAACACACA	878.73	488	1070	1240	1250	1210	1070	1120	642	535	1080	1040	1080	1050	950	859	0.6	0.431452	0.515726	0.719086
A_55_P2117187	Olfr1243	olfactory receptor 1243	ref|NM_146969|ens|ENSMUST00000099775|gb|BC111812|tc|TC1600345	Mus musculus olfactory receptor 1243 (Olfr1243), mRNA [NM_146969]	GO:0004871(signal transducer activity)|GO:0004930(G-protein coupled receptor activity)|GO:0004984(olfactory receptor activity)|GO:0005886(plasma membrane)|GO:0007165(signal transduction)|GO:0007186(G-protein coupled receptor signaling pathway)|GO:0007608(sensory perception of smell)|GO:0016020(membrane)|GO:0016021(integral to membrane)|GO:0050896(response to stimulus)|GO:0050911(detection of chem…	GGTGGTTGTCTGCTTTTTTGCTCCCTGTATTTTTATATATGCTAGGCCTGTTTCCAATTT	90.6272	78.8	66.2	115	104	138	189	212	31.8	63.4	57.6	80.9	65.5	116	169	145	0.480363	0.551304	0.515833	1.14768
A_30_P01031557			chr9:113233366-113261487_R	lincRNA:chr9:113233366-113261487 reverse strand		AATAACTTTAATGTCCACTGGAATGGCTCTGTGGAAGCTGCCCTGCCAAAGAAAACAGGT	290.346	349	497	671	405	424	452	506	315	267	752	921	401	455	460	422	0.633803	0.397914	0.515858	0.627819
A_30_P01032114			chrX:12755425-12772575_R	lincRNA:chrX:12755425-12772575 reverse strand		GCGGGTTATATATTGACAGCAAATTTCTGCAGATAAGACAATGAATAAACTCTCCACTCC	58.6223	55.5	172	67.2	66.9	50.3	61.6	60	64.4	44.2	72	58.3	38.4	57.6	34.8	40.8	0.374419	0.657738	0.516078	1.75669
A_51_P211854	Selp	selectin, platelet	ref|NM_011347|ens|ENSMUST00000161020|ens|ENSMUST00000162746|gb|M87861	Mus musculus selectin, platelet (Selp), mRNA [NM_011347]	GO:0001530(lipopolysaccharide binding)|GO:0001948(glycoprotein binding)|GO:0002687(positive regulation of leukocyte migration)|GO:0002691(regulation of cellular extravasation)|GO:0005515(protein binding)|GO:0005615(extracellular space)|GO:0005634(nucleus)|GO:0005737(cytoplasm)|GO:0006954(inflammatory response)|GO:0007155(cell adhesion)|GO:0007157(heterophilic cell-cell adhesion)|GO:0007159(leukoc…	ATGCCTGCTTTAAGATCTCCTGGGTCTTCCATGTTTCATATCAATGAGGTTGTTTACACC	106.577	114	193	201	406	482	545	758	89.8	114	315	326	335	327	563	450	0.465285	0.567164	0.516225	1.21896
A_30_P01020749			chr17:46989233-46990845_R	lincRNA:chr17:46989233-46990845 reverse strand		AGGTTCGTGTCCCTTGAACTGGCTACAGAATAACAGTAGAGGGAAATTAGGGAAAAAGGG	242.251	289	340	402	270	328	318	292	182	200	237	238	249	259	243	221	0.535294	0.497512	0.516403	0.929419
A_52_P149545	Tacr1	tachykinin receptor 1	ref|NM_009313|ens|ENSMUST00000032122|gb|AK038558|gb|BC098332	Mus musculus tachykinin receptor 1 (Tacr1), mRNA [NM_009313]	GO:0002118(aggressive behavior)|GO:0002687(positive regulation of leukocyte migration)|GO:0003051(angiotensin-mediated drinking behavior)|GO:0004871(signal transducer activity)|GO:0004930(G-protein coupled receptor activity)|GO:0004995(tachykinin receptor activity)|GO:0005737(cytoplasm)|GO:0005886(plasma membrane)|GO:0007165(signal transduction)|GO:0007186(G-protein coupled receptor signaling pat…	ACCATTTAACTTGTAAAAATGTCGTCAATTCCTGTTTGTGAGAACACTGTGATTTGTGCT	372.414	611	327	440	329	431	155	229	181	211	127	176	199	226	246	289	0.553517	0.479545	0.516531	0.866361
A_30_P01026399			chr17:33368400-33393525_F	lincRNA:chr17:33368400-33393525 forward strand		AGTTTCTCTGGAGCTGTGGGTAGTTCACATCCATACTTTCTTCCTCTGTCTTCCCTAAAA	746.371	947	1490	1840	4640	5010	4830	7030	824	884	3350	4240	3770	3480	5180	4050	0.55302	0.480435	0.516727	0.868747
A_30_P01021560			chr16:3337275-3355950_F	lincRNA:chr16:3337275-3355950 forward strand		GCTTTAGGGAGTCTCCTCACCATTCTGCACTTGCAAACCGGGCCACTAGAACCCAGTGAA	48.7432	45	73.9	51.6	73.9	50.2	92.3	111	28.7	33.3	34.2	30.5	48.2	42.3	151	102	0.388363	0.645349	0.516856	1.66172
A_30_P01021975			chr15:97674015-97674423_R	lincRNA:chr15:97674015-97674423 reverse strand		TGTATTTCTGAGGTTATCTCAAACTCAAACGCTAGAGATCTTCCCATCCGAGGGTTGAGG	74.5181	113	195	208	646	674	603	859	93.8	115	442	503	703	438	31.6	515	0.481026	0.552885	0.516955	1.14939
A_30_P01019280			chr8:91569369-91594119_R	lincRNA:chr8:91569369-91594119 reverse strand		GAACCCCAGCTGTGGCACCTCACTATCCTTCTCTTTCCCGACCCGTTCAAAAATAAAAAA	758.938	417	1130	1190	1140	923	1070	1040	623	576	672	669	703	682	1190	989	0.551327	0.484034	0.517681	0.877942
A_30_P01023772			chr17:84895250-84908450_R	lincRNA:chr17:84895250-84908450 reverse strand		CAAAATTGATTTCCTTTGGGTTTTTTTGTTTTTGGGGGTTTTTTTTGGTTTTTTGTTTTG	212.79	312	125	190	114	164	141	179	71.8	87.7	93.7	152	99.9	135	122	158	0.5744	0.461579	0.517989	0.803585
A_30_P01028926			chr7:6302922-6306477_F	lincRNA:chr7:6302922-6306477 forward strand		AAATCCAGCCAGAAATGCCGGCCCAGTGTTAATCCATCACAAAGAAATGCCCGCATTAAA	91.3024	99.9	288	123	87	118	147	139	109	80.9	109	117	85.3	96	170	120	0.378472	0.657724	0.518098	1.73784
A_55_P2012211	Ooep	oocyte expressed protein	ref|NM_026480|ens|ENSMUST00000034900|gb|AK145510|gb|AK162205	Mus musculus oocyte expressed protein (Ooep), mRNA [NM_026480]	GO:0001701(in utero embryonic development)|GO:0003723(RNA binding)|GO:0005515(protein binding)|GO:0005737(cytoplasm)|GO:0005938(cell cortex)|GO:0006468(protein phosphorylation)|GO:0007566(embryo implantation)|GO:0009566(fertilization)|GO:0009880(embryonic pattern specification)|GO:0035088(establishment or maintenance of apical/basal cell polarity)|GO:0043234(protein complex)|GO:0043623(cellular p…	ATGTCAGCTCTTGATCCCTTTGTCCTTCCTTATTGAGACAGAATATCTATGTCGCCCCGA	110.172	110	84	102	102	141	150	186	53.4	40.9	83.2	127	85	76.6	169	123	0.635714	0.40098	0.518347	0.630756
A_30_P01019345			chr16:8738782-8830148_R	lincRNA:chr16:8738782-8830148 reverse strand		TCTCTGAGTGTTCTGCCTCTTCAGGCCTCAGTTGTTGAACCAGGGAAAAGGTTATAAATT	23.0872	52.6	58.3	68.8	47.8	65.4	75.5	123	34	31.3	44.4	53.4	46.5	65.9	69.4	91.1	0.58319	0.454942	0.519066	0.780091
A_30_P01026255			chr4:8606650-8614031_F	lincRNA:chr4:8606650-8614031 forward strand		AGGTTGTGGTCTGTCCTCTACCCTAGTGAGCAAACCCAGCAACCTTCCTCTGCTTGCCCT	167.612	225	415	224	206	287	384	319	181	135	197	187	184	204	290	225	0.436145	0.602679	0.519412	1.38183
A_51_P139678	Sprr1a	small proline-rich protein 1A	ref|NM_009264|ens|ENSMUST00000054599|gb|AK144782|gb|X91824	Mus musculus small proline-rich protein 1A (Sprr1a), mRNA [NM_009264]	GO:0005737(cytoplasm)|GO:0018149(peptide cross-linking)|GO:0031424(keratinization)|GO:0071944(cell periphery)	GCTCCTGAGCCTCTTAACATTGCCCAAAGTCATATTGAATGGCTACACTTTTCATGGCTC	50.9469	56.9	50.6	55.8	58.7	61.2	101	95.1	27.2	28.1	62.2	38.8	116	112	96.1	78.8	0.537549	0.503584	0.520567	0.936815
A_55_P1958172	Ms4a5	membrane-spanning 4-domains, subfamily A, member 5	ref|NM_183190|ens|ENSMUST00000067673|gb|AY039036|gb|AY039035	Mus musculus membrane-spanning 4-domains, subfamily A, member 5 (Ms4a5), mRNA [NM_183190]	GO:0003674(molecular_function)|GO:0005575(cellular_component)|GO:0008150(biological_process)|GO:0016020(membrane)|GO:0016021(integral to membrane)	TAATGGCATTTCCTCCTCCAATAGAGTGATCACCTTGGTGTAATCACACACACACACACA	99.7046	162	370	234	246	312	246	276	128	163	145	217	141	216	147	193	0.345946	0.696581	0.521264	2.01356
A_55_P2078093	Foxl2os	forkhead box L2 opposite strand transcript	ref|NR_003248|gb|AK143359|riken|E330015D05	Mus musculus forkhead box L2 opposite strand transcript (Foxl2os), long non-coding RNA [NR_003248]		ATTTATGCGTGTGCGTACCCACACAGTGGTGTGTGTATTTGTCTCTCTGTGTGTATGTGT	32.7029	66.6	58.1	104	74	88.2	118	148	32.9	49.6	39.8	69.4	47.6	96.1	138	118	0.566265	0.476923	0.521594	0.842226
A_30_P01030153			chr2:174088550-174109425_R	lincRNA:chr2:174088550-174109425 reverse strand		TTGAGGGACTTGGCTGTGACATTTACCATCTTTGGACACGTTTACTTTGCAGAGGAAGCA	234.378	244	126	178	45.7	67.2	39.3	45.8	85.5	65	26	42.1	27	34.6	29.6	20.9	0.678571	0.365169	0.52187	0.538143
A_30_P01028775			chr2:22782700-22801900_R	lincRNA:chr2:22782700-22801900 reverse strand		TACAAGGGTGATCAGTGCACTAGGATGGGTCAGTAGTGTCCAAACCTGAGTAATTCTAAG	102.563	112	211	115	53.3	78.5	52.3	63.5	70.6	81.7	69.9	74.8	60.1	64	69	59.2	0.334597	0.710435	0.522516	2.12325
A_55_P2065429						TTTGGTGTCTCAAAGGGACACAGATATCCTATCCAGAGCTAAGAATATCTCCATGGGAGC	56.1892	129	79.6	55.4	50.2	72.6	44.6	57.1	33.5	34.6	38.6	32.3	32.7	38.2	27.6	36.8	0.420854	0.624549	0.522702	1.484
A_55_P1973941	Slc7a5	solute carrier family 7 (cationic amino acid transporter, y+ system), member 5	ref|NM_011404|ens|ENSMUST00000045557|gb|AK142288|gb|AK211029	Mus musculus solute carrier family 7 (cationic amino acid transporter, y+ system), member 5 (Slc7a5), mRNA [NM_011404]	GO:0003333(amino acid transmembrane transport)|GO:0005737(cytoplasm)|GO:0005886(plasma membrane)|GO:0006810(transport)|GO:0006865(amino acid transport)|GO:0007275(multicellular organismal development)|GO:0007399(nervous system development)|GO:0015171(amino acid transmembrane transporter activity)|GO:0015179(L-amino acid transmembrane transporter activity)|GO:0015807(L-amino acid transport)|GO:001…	GTGGTTATAATGTCTTTTACTATTGTATTAATGGCTAGCCTGTTACATTAGACTGGGGGG	2509.18	2600	2250	2720	1440	1870	1090	1400	1170	1430	1140	1570	1500	1640	886	1090	0.52	0.525735	0.522868	1.01103
A_55_P1959843						TTCTTGTGTGCCCCTGAGAAACAAAGTTCAAATAACCATTGTACAGCCCAGCATCGCCAA	50.401	50.8	64.9	75.7	71.8	114	116	140	41.2	31.2	95.8	85.1	61.6	86.2	186	204	0.634823	0.412153	0.523488	0.649241
A_55_P2088711	Sgsm1	small G protein signaling modulator 1	ref|NM_001162965|ref|NR_027936|ens|ENSMUST00000147856|ens|ENSMUST00000145708	Mus musculus small G protein signaling modulator 1 (Sgsm1), transcript variant 3, mRNA [NM_001162965]	GO:0005097(Rab GTPase activator activity)|GO:0005794(Golgi apparatus)|GO:0032313(regulation of Rab GTPase activity)	AGAATCATTCCAGGGAAATGTCAGACTAGTACCTCTCATGAATATAAAAGCAAAACGTCT	299.923	315	302	440	250	299	218	244	168	216	223	199	175	150	227	158	0.556291	0.490909	0.5236	0.882468
A_55_P2131979	41334	membrane-associated ring finger (C3HC4) 1	ref|NM_175188|ref|NM_001166372|ref|NM_001166375|ens|ENSMUST00000152320	Mus musculus membrane-associated ring finger (C3HC4) 1 (March1), transcript variant 3, mRNA [NM_175188]	GO:0000209(protein polyubiquitination)|GO:0002495(antigen processing and presentation of peptide antigen via MHC class II)|GO:0004842(ubiquitin-protein ligase activity)|GO:0005764(lysosome)|GO:0005765(lysosomal membrane)|GO:0005768(endosome)|GO:0005789(endoplasmic reticulum membrane)|GO:0005794(Golgi apparatus)|GO:0005886(plasma membrane)|GO:0006955(immune response)|GO:0008270(zinc ion binding)|G…	AAATGACACACACACACGCACACACACACAAAACAAAAAATTTGGTCTTAAGCCTGAAAG	21208.2	29100	34600	53900	46900	61200	39000	48900	19800	25600	26700	37100	26900	33400	25800	28900	0.572254	0.474954	0.523604	0.829969
A_55_P2098941	1700110I01Rik	RIKEN cDNA 1700110I01 gene	ref|NR_038059|ens|ENSMUST00000112726|ens|ENSMUST00000179153|ens|ENSMUST00000096151	Mus musculus RIKEN cDNA 1700110I01 gene (1700110I01Rik), long non-coding RNA [NR_038059]	GO:0003674(molecular_function)|GO:0005575(cellular_component)|GO:0008150(biological_process)	TTTCCCCTACTGCTGCAGGACCAGGAGAGGATTCGTCCAACAGTGAATCAGAGCAGGAGG	69.2178	85.3	140	91	59	62.3	69.3	46.7	54.7	59.8	55.2	58.5	59.3	56.1	44.5	48.2	0.390714	0.657143	0.523929	1.6819
A_55_P1961125	H19	H19 fetal liver mRNA	ref|NR_001592	Mus musculus H19 fetal liver mRNA (H19), long non-coding RNA [NR_001592]	GO:0005737(cytoplasm)|GO:0005844(polysome)|GO:0008285(negative regulation of cell proliferation)|GO:0010468(regulation of gene expression)	CTAATTGTCCACCCACTCACTCAGGATTCTGTCCTTTGCAGAACACCATGGGCTGGCGCC	51.3129	60.1	55.3	68.6	64.9	85.8	88.2	106	33	31	71.5	83.7	73.9	46.1	102	107	0.596745	0.451895	0.52432	0.757267
A_55_P2005016	Dcps	decapping enzyme, scavenger	gb|AK171018|riken|F630218K07	Mus musculus NOD-derived CD11c +ve dendritic cells cDNA, RIKEN full-length enriched library, clone:F630218K07 product:similar to Hypothetical HIT-like structure containing protein [Mus musculus], full insert sequence. [AK171018]	GO:0000290(deadenylation-dependent decapping of nuclear-transcribed mRNA)|GO:0000340(RNA 7-methylguanosine cap binding)|GO:0003824(catalytic activity)|GO:0005634(nucleus)|GO:0005737(cytoplasm)|GO:0005739(mitochondrion)|GO:0006397(mRNA processing)|GO:0008380(RNA splicing)|GO:0016787(hydrolase activity)|GO:0036245(cellular response to menadione)|GO:0043069(negative regulation of programmed cell dea…	TGCGGAAGTCTCAGCCCTTCAAGTCACTCCCAGCATCTTTTCCATTTACCAAGTTCCTAG	53.1769	66.6	158	117	102	145	217	154	87.3	58.1	93.2	83.9	93.3	107	176	83.4	0.552532	0.496581	0.524556	0.898738
A_30_P01027752			chr4:101040523-101080248_F	lincRNA:chr4:101040523-101080248 forward strand		TTAGGAAGTTCTGGATCCATTCACCTTGGACTCCTGACCTTATTCCTTCACCTTCCAAGA	67.9764	47.8	60.1	62.7	66.8	95.1	216	186	32.1	32.3	32.7	43.6	45.6	55.8	226	159	0.53411	0.515152	0.524631	0.964505
A_30_P01021057			chr1:193755364-193770539_R	lincRNA:chr1:193755364-193770539 reverse strand		TTACCTGACACACTCCCTCTCTACAGAAGGGGTAAAGCAGCTAGCTCATAGACTTTTGTA	20.5087	43	88.4	55.2	83.9	39.2	65.3	73.5	37.5	34.6	33.5	37	29.3	34.6	73.7	49.5	0.424208	0.626812	0.52551	1.4776
A_30_P01024891			chr12:110003268-110030953_R	lincRNA:chr12:110003268-110030953 reverse strand		TCTATATTCATGCTATTTGTGTAACAGCTAAGAATTTGGCTCCTTTGTGAAATCAGTCAG	50.118	59.2	72.6	74.8	171	188	207	262	41.5	35.9	133	154	178	151	236	188	0.571625	0.479947	0.525786	0.839617
A_52_P367147			ens|ENSMUST00000146524|ens|ENSMUST00000139194|ref|XR_035174|gb|AK039819	RIKEN cDNA A930013B10 gene [Source:MGI Symbol;Acc:MGI:3041185] [ENSMUST00000146524]		AGAGATACCACCAGAAGAACTATGTCTACCTCGGTGTTTCTCCCAGAATGAATGCTGTGT	107.679	130	165	91.2	63.9	84.3	54.2	43.4	58.3	63.7	75.8	82.1	35.2	47.6	60.6	42.2	0.353333	0.698465	0.525899	1.97679
A_52_P150651	Cog5	component of oligomeric golgi complex 5	ref|NM_001163126|ens|ENSMUST00000036862|gb|AK030656|tc|TC1601703	Mus musculus component of oligomeric golgi complex 5 (Cog5), mRNA [NM_001163126]	GO:0003674(molecular_function)|GO:0005634(nucleus)|GO:0005737(cytoplasm)|GO:0005794(Golgi apparatus)|GO:0006810(transport)|GO:0006891(intra-Golgi vesicle-mediated transport)|GO:0015031(protein transport)|GO:0016020(membrane)|GO:0017119(Golgi transport complex)|GO:0048219(inter-Golgi cisterna vesicle-mediated transport)	GACTACTTTAAACACTTTGAATGCATGGATTTTGTTTTTGACAACACTGAAGCTATTGCC	115.166	162	68.1	80.2	73.1	92.3	60.7	87.9	24.3	55.8	53.2	79.1	91.1	84.8	54.7	66.8	0.356828	0.695761	0.526294	1.94985
A_30_P01033377			chr10:96082444-96096696_R	lincRNA:chr10:96082444-96096696 reverse strand		CTCCCTCCCTTCCTTGGAATGTGAAGCTCAAACCCCGTTAATATTTACAGCAAAATTACT	5438.77	7790	13600	8610	7830	10200	6970	9040	6380	5040	6420	8320	10200	7690	4660	5880	0.469118	0.585366	0.527242	1.2478
A_30_P01027358			chr4:116790373-116797823_F	lincRNA:chr4:116790373-116797823 forward strand		TCGATCCTTTGGGCTTCGTTCCTCTTATGAATCGCTAGAGCCATCCATACCTCTGTCTCT	213.047	195	331	422	411	333	296	288	193	199	371	327	379	301	371	242	0.583082	0.471564	0.527323	0.808744
A_55_P2059586	Fmo3	flavin containing monooxygenase 3	ref|NM_008030|ens|ENSMUST00000142759|ens|ENSMUST00000028010|gb|AK050123	Mus musculus flavin containing monooxygenase 3 (Fmo3), mRNA [NM_008030]	GO:0004497(monooxygenase activity)|GO:0004499(N,N-dimethylaniline monooxygenase activity)|GO:0005783(endoplasmic reticulum)|GO:0016020(membrane)|GO:0016021(integral to membrane)|GO:0016491(oxidoreductase activity)|GO:0016597(amino acid binding)|GO:0017144(drug metabolic process)|GO:0034899(trimethylamine monooxygenase activity)|GO:0043231(intracellular membrane-bounded organelle)|GO:0050660(flavi…	ACACGGTTTCAAACTTTCCTCAAAAACAACTTACCCACCGCCATCTCTGACTGGTGGTAC	116.559	69.5	147	140	175	153	236	240	94.8	57.4	127	110	124	114	284	199	0.644898	0.41	0.527449	0.635759
A_52_P129428	Fzd2	frizzled homolog 2 (Drosophila)	ref|NM_020510|ens|ENSMUST00000057893|gb|AK048420|gb|AK135363	Mus musculus frizzled homolog 2 (Drosophila) (Fzd2), mRNA [NM_020510]	GO:0001944(vasculature development)|GO:0003149(membranous septum morphogenesis)|GO:0003150(muscular septum morphogenesis)|GO:0003151(outflow tract morphogenesis)|GO:0004871(signal transducer activity)|GO:0004888(transmembrane signaling receptor activity)|GO:0004930(G-protein coupled receptor activity)|GO:0005515(protein binding)|GO:0005737(cytoplasm)|GO:0005886(plasma membrane)|GO:0006357(regulat…	CGTGACATTCTATATCATAAGATATTGATAAGAATGTTTCTAACATGTTTCTTCCCCGCC	66.8438	104	129	138	174	167	117	183	78.6	61.5	124	128	165	158	130	106	0.609302	0.445652	0.527477	0.731414
A_30_P01030406			chr5:22928221-22939127_R	lincRNA:chr5:22928221-22939127 reverse strand		CTGTTGTCCTTAGAGACTCATCTAAGGTATCACTGCTTCTAGAGCCAGCGATTGCATAAG	62.5445	79.3	94.4	122	97.8	122	82.2	86.7	62.3	48.2	88.4	79.1	90.1	83.3	86.3	47.3	0.659958	0.395082	0.52752	0.598647
A_30_P01024936			chr11:95627874-95640824_F	lincRNA:chr11:95627874-95640824 forward strand		TTTTCTCATCTGATGAAGTCTTCCTGAGTACCTACCCTTCAAACTAAAGGAGCGCGAGCT	125.842	187	244	215	350	518	320	690	102	137	310	414	431	332	288	404	0.418033	0.637209	0.527621	1.5243
A_30_P01022679			chr3:40439525-40509975_R	lincRNA:chr3:40439525-40509975 reverse strand		AGATCTTGGTGAAGCGCCTGAGCTTGGGCTCGGACTTCTTCCTCTCTCTGGAATCGTCCT	90.184	102	137	144	165	148	189	203	81.8	66	129	127	111	118	130	144	0.59708	0.458333	0.527707	0.767624
A_30_P01022614			chr4:131737612-131738100_R	lincRNA:chr4:131737612-131738100 reverse strand		CCCAATTTTGCTTCTCTGTCCGGTGTTGCTGTCAACGGTTTCATTTCTTCCTGTACTGAA	39.6641	45.9	63.8	80.8	74.8	91.6	202	199	30	47.4	52.5	69	48.1	75.1	198	143	0.470219	0.586634	0.528427	1.24757
A_55_P1978013	Obp1a	odorant binding protein IA	ref|NM_008754|ens|ENSMUST00000088201|gb|AK017455|tc|TC1582062	Mus musculus odorant binding protein IA (Obp1a), mRNA [NM_008754]	GO:0005549(odorant binding)|GO:0005575(cellular_component)|GO:0008150(biological_process)	AAACATGCCTTTCCTTCCCCTTCTCATGATCTTCCTTTTTTGAATGACTTAATAAAGTGA	986.898	1220	1530	2030	1370	1780	1310	1540	943	895	1770	2230	1170	1400	939	1260	0.61634	0.440887	0.528613	0.71533
A_30_P01020080			chr15:98842850-98853100_R	lincRNA:chr15:98842850-98853100 reverse strand		TATATTTGGGCCAAGTTTTCCCTGTGTGAGGGGGGATGACCCTTGCTCTGGGTAGCCTGG	77.349	82.7	116	150	230	352	300	427	59	82.4	166	297	217	232	307	226	0.508621	0.549333	0.528977	1.08005
A_30_P01025875			chr17:41231055-41249764_R	lincRNA:chr17:41231055-41249764 reverse strand		TTTGTCCCAGGATACATGAGACACTGAGGAAGACATCATCATTGATTCCATAGAGACCCT	57.9123	74.1	101	59.3	37.4	59.2	42.7	47.1	39.3	39.7	22.1	45.6	23.9	39.4	19	44.7	0.389109	0.669477	0.529293	1.72054
A_30_P01021970			chr19:5801802-5802597_R	lincRNA:chr19:5801802-5802597 reverse strand		GTTTGAAAATGAGGTGTAGTTTTAAAAGATTGAGAAAAGTAGGTTAAGTTGACGGCCGTT	14579.1	20900	30700	40200	37500	49000	31700	40300	15700	22000	28800	33200	29300	29400	31000	26000	0.511401	0.547264	0.529332	1.07013
A_55_P2340613	B230110G15Rik	RIKEN cDNA B230110G15 gene	gb|AK020962|tc|TC1611215|riken|B230110G15|nap|NAP076540-1	Mus musculus adult male corpora quadrigemina cDNA, RIKEN full-length enriched library, clone:B230110G15 product:unclassifiable, full insert sequence. [AK020962]		GACATCGGTCCTCTGTGGAATGAATGTTTTTTAATTTCCTTAAAAACTGCTCATTTTCTC	38.8153	46.6	75.5	92.9	45.1	55.2	60.9	56.6	36.3	53.8	33.6	40.6	25.8	41.2	69.7	51.8	0.480795	0.579117	0.529956	1.2045
A_51_P264866	Olfr1395	olfactory receptor 1395	ref|NM_146877|ens|ENSMUST00000059379|tc|TC1707535|nap|NAP021659-001	Mus musculus olfactory receptor 1395 (Olfr1395), mRNA [NM_146877]	GO:0004871(signal transducer activity)|GO:0004930(G-protein coupled receptor activity)|GO:0004984(olfactory receptor activity)|GO:0005886(plasma membrane)|GO:0007165(signal transduction)|GO:0007186(G-protein coupled receptor signaling pathway)|GO:0007608(sensory perception of smell)|GO:0016020(membrane)|GO:0016021(integral to membrane)|GO:0050896(response to stimulus)|GO:0050911(detection of chem…	CTGTCCCTCATGGACCTCATGCTCATCTCCACCATTGTGCCACGGATGGCTGCTGACTTT	95.0474	66.2	93.2	141	110	133	195	153	59.4	59.6	94.3	99.8	92.9	91.4	232	189	0.637339	0.422695	0.530017	0.663218
A_55_P2380132	AI844869	expressed sequence AI844869	gb|BE862015|tc|TC1641969	UI-M-AH1-agx-d-12-0-UI.r1 NIH_BMAP_MCE_N Mus musculus cDNA clone UI-M-AH1-agx-d-12-0-UI 5'. [BE862015]		AAATTGTCTAAAGAATCCAGTTGTCCCAGTATTGATTTTGTGGCCGTGTGCGTGGGAGGA	78.8984	92	79.1	101	119	127	145	155	34.2	63.4	64	91.9	96.7	112	154	116	0.432364	0.627723	0.530043	1.45184
A_52_P262219	Fos	FBJ osteosarcoma oncogene	ref|NM_010234|ens|ENSMUST00000021674|gb|AK159667|gb|AK159688	Mus musculus FBJ osteosarcoma oncogene (Fos), mRNA [NM_010234]	GO:0003677(DNA binding)|GO:0003690(double-stranded DNA binding)|GO:0003700(sequence-specific DNA binding transcription factor activity)|GO:0005515(protein binding)|GO:0005634(nucleus)|GO:0005667(transcription factor complex)|GO:0005737(cytoplasm)|GO:0005783(endoplasmic reticulum)|GO:0006355(regulation of transcription, DNA-dependent)|GO:0006366(transcription from RNA polymerase II promoter)|GO:00…	GGACTTTATTTTCCAGTAGATAGAAATCAATAGCTATATCCATGTACTGTAGTCCTTCAG	559.943	762	3250	4140	3480	4830	2890	4180	1640	2300	2230	3220	2140	2430	2820	3330	0.504615	0.555556	0.530085	1.10095
A_30_P01025507			chr2:157236070-157249445_F	lincRNA:chr2:157236070-157249445 forward strand		AGTCTGTGGTCCCCAAACTGCTGCCACATGTCCTCAATCCAGTATGGGGCCGACAAGCAA	72.6564	84.3	243	119	85.6	103	104	107	82.3	86	71.1	73.5	73.9	81.6	96.8	97.2	0.338683	0.722689	0.530686	2.13382
A_55_P2450933	N4bp2l2	NEDD4 binding protein 2-like 2	ref|NM_201369|ens|ENSMUST00000118316|gb|AK046992|gb|AK082038	Mus musculus NEDD4 binding protein 2-like 2 (N4bp2l2), mRNA [NM_201369]	GO:0001701(in utero embryonic development)|GO:0001824(blastocyst development)|GO:0005515(protein binding)|GO:0005634(nucleus)	CATAATTATCACCTCCAGTTGGAGTTCTGATCTCGGGTTTGGTTTGTTTCTATATATATC	136.096	118	120	129	134	136	142	156	63.7	68.8	85.8	113	116	122	124	123	0.530833	0.533333	0.532083	1.00471
A_30_P01027296			chr15:84737071-84753414_R	lincRNA:chr15:84737071-84753414 reverse strand		TAATCAGTAAATGTATCCATTCACTCTTCCTCCAAGGCATACATGTCCATTATCCAGCCA	111.875	162	355	172	134	214	190	228	126	122	130	173	159	191	197	143	0.35493	0.709302	0.532116	1.99843
A_55_P2125623						GCTCCCCCACCTACCTCTAATTCTCAGAAAGGCCTTGGAGCTGAAAGCATGAGCTCATAG	604.042	831	1010	1450	998	1190	974	1120	622	652	1100	1140	690	882	1200	912	0.615842	0.449655	0.532748	0.730147
A_52_P323975	Farsa	phenylalanyl-tRNA synthetase, alpha subunit	ens|ENSMUST00000144404|gb|AK084031|tc|TC1586416|riken|D130077P12	phenylalanyl-tRNA synthetase, alpha subunit [Source:MGI Symbol;Acc:MGI:1913840] [ENSMUST00000144404]	GO:0000049(tRNA binding)|GO:0000166(nucleotide binding)|GO:0004812(aminoacyl-tRNA ligase activity)|GO:0004826(phenylalanine-tRNA ligase activity)|GO:0005524(ATP binding)|GO:0005737(cytoplasm)|GO:0006412(translation)|GO:0006418(tRNA aminoacylation for protein translation)|GO:0006432(phenylalanyl-tRNA aminoacylation)|GO:0008150(biological_process)|GO:0016874(ligase activity)|GO:0043039(tRNA aminoac…	TCCTCCTGAATGCTAAGATGGCTGTTACCAACTGAGTCATAGCTTTGAGTAGGACAGAAT	137.114	179	128	145	131	147	146	134	83.5	60.1	95.7	93.7	113	94.7	102	70.8	0.652344	0.414483	0.533413	0.635375
A_55_P1987974	Glipr1l3	GLI pathogenesis-related 1 like 3	ref|XM_001480631|ref|XM_916012	PREDICTED: Mus musculus GLI pathogenesis-related 1 like 3 (Glipr1l3), mRNA [XM_001480631]	GO:0003674(molecular_function)|GO:0005575(cellular_component)|GO:0008150(biological_process)	TTTTCTAGACTTCAGACCTTACAGGAAAGGAGACCCCTGCTCTATGTGTGGACAAAGGAA	149.952	73.1	80.2	136	111	123	156	131	55	51.9	81.3	116	85.5	106	169	121	0.685786	0.381618	0.533702	0.556468
A_30_P01031305			chr16:40283097-40284822_F	lincRNA:chr16:40283097-40284822 forward strand		AGTTTCGGTGAAATCTGAATACTGTTATAGAGAAGGCATAATAGATCCAAAACTCAAGCT	86.9173	96.2	66.4	91.2	54.5	59.9	42.3	47.2	42.6	38.9	44.5	48.9	40.8	26.8	31.6	26	0.641566	0.426535	0.534051	0.664834
A_30_P01025882			chr8:86705694-86711244_F	lincRNA:chr8:86705694-86711244 forward strand		CTTGTTTATGTGTGATGTCAACACTGTAGGTGGATGGGTGTGTCAAGCTCATTGTGTCCA	180.562	207	77.9	118	99.2	111	86	141	40.8	64.3	85.4	94.2	62.8	88.7	84.5	61	0.523748	0.544915	0.534332	1.04041
A_30_P01020694			chr1:38892041-38893543_R	lincRNA:chr1:38892041-38893543 reverse strand		TTGAAGAAGATGGGAGCGGTCTCATGCAAAATGTCTTCCTGGAAAATTGTTTGGTAGTGT	224.413	321	481	482	945	1300	957	1370	217	298	750	886	1120	765	905	786	0.451143	0.618257	0.5347	1.37042
A_55_P2125536	Tmem210	transmembrane protein 210	ref|NM_030055|ens|ENSMUST00000028340|ens|ENSMUST00000144102|gb|AK019803	Mus musculus transmembrane protein 210 (Tmem210), mRNA [NM_030055]	GO:0003674(molecular_function)|GO:0005575(cellular_component)|GO:0008150(biological_process)|GO:0016020(membrane)|GO:0016021(integral to membrane)	TCCTCCCCCACTTCCACAGTAGTGGAGAGCAACTAGGGTGGAGAATTAAACAGTATTTAG	115.798	190	195	239	203	209	240	224	134	91.5	149	163	103	131	145	182	0.687179	0.382845	0.535012	0.557125
A_55_P2168113	Nudcd1	NudC domain containing 1	ref|NM_001113554|ref|NM_026149|ens|ENSMUST00000038719|gb|AF521132	Mus musculus NudC domain containing 1 (Nudcd1), transcript variant 2, mRNA [NM_001113554]	GO:0003674(molecular_function)|GO:0005575(cellular_component)|GO:0005634(nucleus)|GO:0005737(cytoplasm)|GO:0008150(biological_process)	TCAAGACAGTGTCTACTACATTGATAACCTTGGAAGAATTATGAACTTAACAGTGATGCT	93.5294	97.2	114	62.6	66.8	107	75.7	91.5	37	46.7	45.5	52.6	23.1	58	77.5	70.6	0.324561	0.746006	0.535284	2.29851
A_30_P01031195			chr1:85323303-85337483_F	lincRNA:chr1:85323303-85337483 forward strand		AAGTCTACAGAAACAACAGAGCCTGTGCCCCTCAGGGATTAAGATCACAAATCCCACAAT	167.793	163	271	272	184	228	218	262	128	163	299	245	143	145	244	207	0.472325	0.599265	0.535795	1.26876
A_55_P2139236	A730020M07Rik	RIKEN cDNA A730020M07 gene	ref|NR_036457|ref|NR_036458|gb|AK085594|tc|TC1622969	Mus musculus RIKEN cDNA A730020M07 gene (A730020M07Rik), transcript variant 2, long non-coding RNA [NR_036457]	GO:0003674(molecular_function)|GO:0005575(cellular_component)|GO:0008150(biological_process)	CTCTATGGTATGCACATACCTGCTCCCCAACACTAATTAAATAAATGCAAAAGAAATTAG	81.9169	49.3	75.7	86	81.7	77.4	116	102	41.7	44.8	99.7	73.8	61.5	109	82.2	73.8	0.550859	0.52093	0.535894	0.94567
A_30_P01025156			chr5:77188300-77205150_F	lincRNA:chr5:77188300-77205150 forward strand		TTAAGTCAAGAAGATAACTTCACGGCTGCGTGCTCTGATGCTCTAGCGAGCCATTTCTTT	111.779	110	72.4	80.8	53.5	76.3	124	117	38.5	43.7	52.3	40.9	18.3	47.2	135	88.2	0.531768	0.540842	0.536305	1.01706
A_55_P2013143	Esrp2	epithelial splicing regulatory protein 2	ref|NM_176838|ens|ENSMUST00000115979|gb|BC031444|gb|AK020578	Mus musculus epithelial splicing regulatory protein 2 (Esrp2), mRNA [NM_176838]	GO:0000166(nucleotide binding)|GO:0003676(nucleic acid binding)|GO:0003723(RNA binding)|GO:0003729(mRNA binding)|GO:0005634(nucleus)|GO:0005737(cytoplasm)|GO:0005739(mitochondrion)|GO:0005813(centrosome)|GO:0006397(mRNA processing)|GO:0008380(RNA splicing)|GO:0043484(regulation of RNA splicing)	ATGGTGTGACAGCCAGAAAACCTTCCATCTGTCTTTGGCCCTCAAATACTGAGTTTGAAG	81.7052	46.7	63.7	64.4	52.3	71.2	88.4	91.7	39.6	29.1	26.7	38.4	32.8	57.2	179	73.4	0.621664	0.451863	0.536764	0.726861
A_55_P2048009	Olfr1173	olfactory receptor 1173	ref|NM_207566|ens|ENSMUST00000099830|gb|BC104085|gb|BC104278	Mus musculus olfactory receptor 1173 (Olfr1173), mRNA [NM_207566]	GO:0004871(signal transducer activity)|GO:0004930(G-protein coupled receptor activity)|GO:0004984(olfactory receptor activity)|GO:0005886(plasma membrane)|GO:0007165(signal transduction)|GO:0007186(G-protein coupled receptor signaling pathway)|GO:0007608(sensory perception of smell)|GO:0016020(membrane)|GO:0016021(integral to membrane)|GO:0050896(response to stimulus)|GO:0050911(detection of chem…	TTAAATGAGGTTAGTAGTCTTCTTATCACTATGACCTCCTATGTCTTCCTCATTGTCACA	91.2428	154	242	250	656	895	843	1220	133	131	406	617	639	551	699	600	0.549587	0.524	0.536793	0.953444
A_55_P2169046	Olfr458	olfactory receptor 458	ref|NM_146444|ens|ENSMUST00000090156|nap|NAP098323-001	Mus musculus olfactory receptor 458 (Olfr458), mRNA [NM_146444]	GO:0004871(signal transducer activity)|GO:0004930(G-protein coupled receptor activity)|GO:0004984(olfactory receptor activity)|GO:0005886(plasma membrane)|GO:0007165(signal transduction)|GO:0007186(G-protein coupled receptor signaling pathway)|GO:0007608(sensory perception of smell)|GO:0016020(membrane)|GO:0016021(integral to membrane)|GO:0050896(response to stimulus)|GO:0050911(detection of chem…	GTGGTCTTCTATGCTGTAGTCACCCCCATGCTGAATCCTCTCGTCTACAGTCTGAGGAAC	87.1359	104	143	131	124	178	198	253	73.4	73.4	117	127	122	146	207	176	0.513287	0.560305	0.536796	1.0916
A_30_P01025067			chrX:100745320-100819322_F	lincRNA:chrX:100745320-100819322 forward strand		TTTCAACTGCTTCCCAAGGTTTCCATGGACACAATGATTATCCTCATGTGTTGCTGAATC	56.5436	68.7	89.9	119	113	100	119	115	53.1	57.5	80.1	107	101	101	71.5	121	0.590656	0.483193	0.536925	0.818062
A_30_P01031076			chr2:175543425-175603300_F	lincRNA:chr2:175543425-175603300 forward strand		CATAGACTTTCTCTTCTGTATGATCTTTTGTCTTTGGAGGTCACTCCTTCCTGCAAAGGC	50.1824	95.5	109	154	123	111	339	193	69.2	67.7	83.6	122	94.2	133	194	175	0.634862	0.43961	0.537236	0.69245
A_30_P01032492			chr1:153685487-153710962_F	lincRNA:chr1:153685487-153710962 forward strand		TCAGTTACCTAATGTCCCCATCCTTTGGTTTCATGGTCTTCCACTCCTGAATCCTGGATT	319.452	341	445	576	994	1170	1110	1510	292	241	814	964	875	785	1170	932	0.65618	0.418403	0.537291	0.637634
A_51_P105380	2010005H15Rik	RIKEN cDNA 2010005H15 gene	ref|NM_029733|gb|BC125396|gb|BC125422|gb|BC145264	Mus musculus RIKEN cDNA 2010005H15 gene (2010005H15Rik), mRNA [NM_029733]	GO:0001533(cornified envelope)|GO:0002020(protease binding)|GO:0004869(cysteine-type endopeptidase inhibitor activity)|GO:0005198(structural molecule activity)|GO:0005634(nucleus)|GO:0005737(cytoplasm)|GO:0010466(negative regulation of peptidase activity)|GO:0010951(negative regulation of endopeptidase activity)|GO:0030414(peptidase inhibitor activity)|GO:0030674(protein binding, bridging)	CTTCTAAGCAGCAAATTCTAAAGTGTCCTGACTCTTCTCCTTGTAAACAGATTTGGCCAT	74.8732	68.1	69	62.2	94.3	116	144	179	43.2	27.9	50.3	48.9	55.5	65.7	162	115	0.626087	0.448553	0.53732	0.716439
A_55_P2092884						ACCAAGTCCATCGCCCCTTGGTTTCATGGTAGTGTAGTTTCTGGGCCCCACTGCAGATGA	889.913	1150	1540	2470	1360	1500	1200	1310	907	1200	1010	1340	876	1150	987	1270	0.588961	0.48583	0.537395	0.824893
A_55_P2289040	AI429363	expressed sequence AI429363	gb|CF532098|tc|TC1652002	UI-M-FY0-cgr-m-18-0-UI.r1 NIH_BMAP_FY0 Mus musculus cDNA clone IMAGE:30363281 5', mRNA sequence [CF532098]		ACAAGAGGGATGTCCACACCCTCCTGAGAGTCAGTTTAAAATATCAGCTTAGATACCTGG	76.4	75.6	109	109	89.3	131	95.7	101	68.1	49.1	70.9	71.9	143	131	67.3	81.6	0.624771	0.450459	0.537615	0.720999
A_55_P2092745						TCTCTTTTCTAAGTCTATTAACCTGGCCATTGGGGCTGCTCTAACTCCAGCTCCAAGATT	82.9272	103	94	96	112	131	172	174	54.1	48	81.4	86.8	77.7	89.2	176	171	0.575532	0.5	0.537766	0.868762
A_30_P01022646			chr13:81773237-81783062_F	lincRNA:chr13:81773237-81783062 forward strand		CCTTACCTGTCTCTGCTTGGAGCACCCCGGCCAACACTACTATAGCTGAATTACCAGGAA	45.104	68.8	74.6	102	81.3	85.3	188	136	42.8	51.3	80.4	83.3	77.7	71.1	137	143	0.573727	0.502941	0.538334	0.876622
A_51_P136680	Krtap31-1	keratin associated protein 31-1	ref|NM_027568|ens|ENSMUST00000093935|gb|AK014635|tc|TC1590291	Mus musculus keratin associated protein 31-1 (Krtap31-1), mRNA [NM_027568]	GO:0003674(molecular_function)|GO:0005575(cellular_component)|GO:0005882(intermediate filament)|GO:0008150(biological_process)	CTTCTGCTTCTGAATTACCCCAGATTTTGTGTGTGCGATTTCCTTCTTTCTTCTCACTAG	94.3173	68.3	90.4	99.4	89.5	140	166	195	61.2	39.8	83.6	73.6	58.6	85.6	157	142	0.676991	0.400402	0.538697	0.591444
A_51_P365704	Slc35g3	solute carrier family 35, member G3	ref|NM_019871|ens|ENSMUST00000102586|gb|AF016712|gb|BC137893	Mus musculus solute carrier family 35, member G3 (Slc35g3), mRNA [NM_019871]	GO:0003674(molecular_function)|GO:0005575(cellular_component)|GO:0008150(biological_process)|GO:0016020(membrane)|GO:0016021(integral to membrane)	ACTCTTTGTGCTGCAGACCCCTGTGCTACCCCAAGACACTCTAAGCTGGAGCTGTGTGGT	126.103	180	170	215	197	243	270	277	89.3	119	184	322	193	243	339	338	0.525294	0.553488	0.539391	1.05367
A_30_P01026843			chr5:96591892-96606467_R	lincRNA:chr5:96591892-96606467 reverse strand		AAGCCCAGGCAGCAGGCGTTGAAGAAGAGTGTATTGAACAGGGACCAGGCCACATGGTCA	968.267	928	1660	1360	1590	1220	797	1330	675	915	601	437	709	711	1370	750	0.406627	0.672794	0.53971	1.65458
A_30_P01029364			chr9:20313342-20323517_F	lincRNA:chr9:20313342-20323517 forward strand		TGAAGCTCTCGTCTTGCACTGTACAAATATAATTAGTCACTGCTTACCACGCTCCCCTTA	76.5741	63.6	80.6	86.6	85.7	85.6	113	179	41.2	49.3	57.5	42.1	62.4	67.6	152	138	0.511166	0.569284	0.540225	1.1137
A_30_P01030110			chr19:55715078-55776694_R	lincRNA:chr19:55715078-55776694 reverse strand		CTCTCTCTTAGCTCAACCAGTTGTCCGTGTGAAGATTAGGTTGCTGGTTTTGGCTTTTTT	295.539	428	537	796	506	861	664	768	307	405	445	838	416	712	414	709	0.571695	0.508794	0.540244	0.889975
A_66_P122086	9030619P08Rik	RIKEN cDNA 9030619P08 gene	ref|NM_001039720|ens|ENSMUST00000096397|gb|BC147461|gb|BC147464	Mus musculus RIKEN cDNA 9030619P08 gene (9030619P08Rik), mRNA [NM_001039720]	GO:0003674(molecular_function)|GO:0005575(cellular_component)|GO:0008150(biological_process)	GCCCTACTGCGTGCAGAAAGAGTTCAGGGGCTGGAATGCTACCAGTGTTTTGATGTCCCA	86.229	259	543	501	570	771	536	641	253	308	946	695	723	843	541	554	0.46593	0.61477	0.54035	1.31945
A_51_P446131	Gipc2	GIPC PDZ domain containing family, member 2	ref|NM_016867|ens|ENSMUST00000152680|ens|ENSMUST00000130196|ens|ENSMUST00000128741	Mus musculus GIPC PDZ domain containing family, member 2 (Gipc2), mRNA [NM_016867]	GO:0005515(protein binding)|GO:0005575(cellular_component)|GO:0005737(cytoplasm)|GO:0008150(biological_process)	TGATGATCTCCTTGAGCTGTACATGGGGATTCGAGATATTGACTTAGCTACAACCATGTT	157.732	186	76.3	127	313	145	168	92	51.6	51.4	63.5	53.4	109	107	124	96	0.676278	0.404724	0.540501	0.598459
A_51_P517051	Gatsl3	GATS protein-like 3	ref|NM_028022|ens|ENSMUST00000020699|gb|AK010455|gb|BC039988	Mus musculus GATS protein-like 3 (Gatsl3), mRNA [NM_028022]	GO:0003674(molecular_function)|GO:0005575(cellular_component)|GO:0008150(biological_process)	TCCCTCATCGAGGGGTACATCTCCATTGTCATGGATGCAGAGATCCAGAGAAAGTTCCCC	46.1824	22.7	63.7	69.6	64.6	79.4	67.8	44.4	35.6	36.4	56.8	53.3	86.7	95.8	40.6	32.1	0.55887	0.522989	0.540929	0.935797
A_30_P01030302			chr4:98943050-98959998_F	lincRNA:chr4:98943050-98959998 forward strand		TAAGTGAGACTTTGCTCTTCGCGTCAACCTCCCGGAGTCTCTGTGTGTAGACTAAGCGCA	53.2795	75.4	82.3	91.2	104	153	155	182	47.2	46.4	101	107	74.1	98.2	175	145	0.573512	0.508772	0.541142	0.887117
A_55_P2046661	Tnfrsf14	tumor necrosis factor receptor superfamily, member 14 (herpesvirus entry mediator)	ref|NM_178931|ens|ENSMUST00000137803|ens|ENSMUST00000123514|ens|ENSMUST00000045919	Mus musculus tumor necrosis factor receptor superfamily, member 14 (herpesvirus entry mediator) (Tnfrsf14), mRNA [NM_178931]	GO:0002741(positive regulation of cytokine secretion involved in immune response)|GO:0005515(protein binding)|GO:0009897(external side of plasma membrane)|GO:0031625(ubiquitin protein ligase binding)|GO:0046642(negative regulation of alpha-beta T cell proliferation)|GO:0050731(positive regulation of peptidyl-tyrosine phosphorylation)|GO:0050829(defense response to Gram-negative bacterium)|GO:0050…	ACATATACCGCCCATGCAAATGGCCTGAGCAAGTGTCTGCCCTGCGGAGTCTGTGATCCA	1280.59	386	799	944	652	553	986	689	533	392	319	318	359	384	916	637	0.667084	0.415254	0.541169	0.622492
A_52_P544476	Terc	telomerase RNA component	ref|NR_001579|gb|BB660202	Mus musculus telomerase RNA component (Terc), telomerase RNA [NR_001579]	GO:0000332(template for synthesis of G-rich strand of telomere DNA activity)|GO:0000723(telomere maintenance)|GO:0003720(telomerase activity)|GO:0005697(telomerase holoenzyme complex)|GO:0007004(telomere maintenance via telomerase)|GO:0008283(cell proliferation)|GO:0009791(post-embryonic development)|GO:0010259(multicellular organismal aging)|GO:0032212(positive regulation of telomere maintenance…	ACCTAACCCTGATTTTCATTAGCTGTGGGTTCTGGTCTTTTGTTCTCCGCCCGCTGTTTT	139.811	125	186	335	223	268	431	450	132	125	152	188	180	214	453	387	0.709677	0.373134	0.541406	0.52578
A_30_P01018610			chr8:18895366-18925423_R	lincRNA:chr8:18895366-18925423 reverse strand		TAGACCTCTGTGAACCTCTCCAGGCTCTGCCAGGACTTCACTTGAGAACATTGCCCAGAA	52.4507	96.9	122	72.5	90.6	98.3	97.3	75.1	53.1	47	59.7	61.6	56.6	68.4	102	65.9	0.435246	0.648276	0.541761	1.48945
A_30_P01026939			chr1:59775022-59780348_F	lincRNA:chr1:59775022-59780348 forward strand		CCCTGTAATGCATCTCCGACCCTTTCTAATTTTTATACAATACTTAGAATTATACACCTG	150.692	134	96	105	115	137	144	176	44.8	64.8	136	108	98.9	98.6	121	94.8	0.466667	0.617143	0.541905	1.32245
A_30_P01029685			chr11:53592946-53637922_R	lincRNA:chr11:53592946-53637922 reverse strand		GTCCTGCAGATGCCTTTAATAAATGTTTTTATTTCCTCATACCGCTTCCTCTTTGCATAA	37.4127	37.7	71	81.5	79.5	111	155	213	37.5	45.3	135	103	90.4	129	197	136	0.528169	0.555828	0.541999	1.05237
A_51_P415126	Tgfa	transforming growth factor alpha	ref|NM_031199|ens|ENSMUST00000032066|gb|U65016|gb|AK162680	Mus musculus transforming growth factor alpha (Tgfa), mRNA [NM_031199]	GO:0000165(MAPK cascade)|GO:0000187(activation of MAPK activity)|GO:0001525(angiogenesis)|GO:0001948(glycoprotein binding)|GO:0004708(MAP kinase kinase activity)|GO:0005154(epidermal growth factor receptor binding)|GO:0005576(extracellular region)|GO:0005615(extracellular space)|GO:0005634(nucleus)|GO:0005886(plasma membrane)|GO:0006468(protein phosphorylation)|GO:0007173(epidermal growth factor …	TGGACATACACAGAACCAAACCATGAGTTAGTTTGTCATGTGCCCCAGAAAAAGGTGGGA	142.641	172	325	263	211	302	169	207	167	150	132	165	193	228	160	236	0.513846	0.570342	0.542094	1.10995
A_55_P2154914	Acap1	ArfGAP with coiled-coil, ankyrin repeat and PH domains 1	ref|NM_153788|ens|ENSMUST00000108622|ens|ENSMUST00000001631|gb|AK133473	Mus musculus ArfGAP with coiled-coil, ankyrin repeat and PH domains 1 (Acap1), mRNA [NM_153788]	GO:0003674(molecular_function)|GO:0004871(signal transducer activity)|GO:0005575(cellular_component)|GO:0005768(endosome)|GO:0006629(lipid metabolic process)|GO:0007165(signal transduction)|GO:0008060(ARF GTPase activator activity)|GO:0008150(biological_process)|GO:0008270(zinc ion binding)|GO:0016020(membrane)|GO:0016042(lipid catabolic process)|GO:0016787(hydrolase activity)|GO:0032312(regulati…	ATCTCGACATATTCCGAGACTTCTCCCTCATGGCGTCGGACGACCCAGAGAAACTGAGCC	65.4745	61.9	62.5	70.7	63.6	60.4	74.7	83.5	39.7	31.8	31.3	36.9	49.3	45	87.1	101	0.6352	0.449788	0.542494	0.708104
A_55_P2151284	Olfr372	olfactory receptor 372	ref|NM_207555|ens|ENSMUST00000093434|gb|BC119444|gb|BC119445	Mus musculus olfactory receptor 372 (Olfr372), mRNA [NM_207555]	GO:0004871(signal transducer activity)|GO:0004930(G-protein coupled receptor activity)|GO:0004984(olfactory receptor activity)|GO:0005886(plasma membrane)|GO:0007165(signal transduction)|GO:0007186(G-protein coupled receptor signaling pathway)|GO:0007608(sensory perception of smell)|GO:0016020(membrane)|GO:0016021(integral to membrane)|GO:0050896(response to stimulus)|GO:0050911(detection of chem…	GCTACCACAGCCCAAAACAGGATAACGTTGTATCCCTTTTCTATAGCCTCATCACCCCTA	63.0296	29.1	88.3	66.8	129	151	249	271	47.3	36.7	99.6	102	90	105	453	254	0.535674	0.549401	0.542538	1.02563
A_30_P01020816			chr7:144563845-144603732_R	lincRNA:chr7:144563845-144603732 reverse strand		TAACTTCAGCCTGATTGTTCTGCCCTCAATCTCCATTTTCCTACAGAAGCTTAAAGCTTC	171.879	933	195	155	233	152	230	293	101	88	121	123	136	144	322	218	0.517949	0.567742	0.542845	1.09614
A_55_P2178127	41518	septin 1	ref|NM_017461|ens|ENSMUST00000152267|ens|ENSMUST00000131208|gb|M37030	Mus musculus septin 1 (Sept1), mRNA [NM_017461]	GO:0000166(nucleotide binding)|GO:0005525(GTP binding)|GO:0005737(cytoplasm)|GO:0005856(cytoskeleton)|GO:0007049(cell cycle)|GO:0031105(septin complex)|GO:0051301(cell division)	CGCTCTTCCCGCGTTCCAATTGGGTTTTCCTATTCCTCCAAGTTCTCCATCTAATAAAAA	270.029	339	334	393	506	742	941	1310	219	169	335	471	344	357	1180	932	0.655689	0.430025	0.542857	0.655838
A_55_P2124061						GAAGATATTGCAATGTATTACTGTCTACAGTATTCTGAGCATCCTCCCACAGTGATATAA	44.1985	51	83.6	71.2	81.7	85	89.9	131	52.5	32.6	57.6	77.6	62.6	77.8	132	87.1	0.62799	0.457865	0.542928	0.729096
A_30_P01018576			chrX:11690182-11690581_R	lincRNA:chrX:11690182-11690581 reverse strand		ATTTGTGACATTTGTGTATCAGCTACGCATTCTTAGGCGAGCCTGGGTAACACAGTGAGA	56.6695	98.3	63.8	79.4	33	38.3	51.4	47.3	25.9	54.1	28.3	39.4	34.8	41.6	31	28.8	0.405956	0.68136	0.543658	1.67841
A_66_P130650	Gm9979	predicted gene 9979	ens|ENSMUST00000069457|ref|XM_003085861|ref|XM_003084920|gb|AK044328	predicted gene 9979 [Source:MGI Symbol;Acc:MGI:3642885] [ENSMUST00000069457]	GO:0003674(molecular_function)|GO:0005575(cellular_component)|GO:0008150(biological_process)	AAGCTGGTGAGCACTGTCTTCTTCCTCTTCGTTACCGGGAATAAATTGTTGCAGAAGGAA	89.695	77.3	62.1	92	59.8	96.5	83.1	125	42.7	36.8	75.9	74.6	46.7	63.5	104	89.9	0.687601	0.4	0.5438	0.581733
A_55_P2044729	Aoc2	amine oxidase, copper containing 2 (retina-specific)	ref|NM_178932|ens|ENSMUST00000107264|ens|ENSMUST00000041095|gb|BC150843	Mus musculus amine oxidase, copper containing 2 (retina-specific) (Aoc2), mRNA [NM_178932]	GO:0005507(copper ion binding)|GO:0005575(cellular_component)|GO:0006584(catecholamine metabolic process)|GO:0008131(primary amine oxidase activity)|GO:0009308(amine metabolic process)|GO:0016491(oxidoreductase activity)|GO:0046872(metal ion binding)|GO:0048038(quinone binding)|GO:0052593(tryptamine:oxygen oxidoreductase (deaminating) activity)|GO:0052594(aminoacetone:oxygen oxidoreductase(deamin…	TACCCTCCTTTTCCTATGAAGGCTTATAGGCCTGAGGCTATGGTGAGGCCCCAGGGTAGG	84.7769	120	119	134	217	266	221	276	67.8	69.4	150	199	172	181	247	234	0.569748	0.51791	0.543829	0.909017
A_51_P211854	Selp	selectin, platelet	ref|NM_011347|ens|ENSMUST00000161020|ens|ENSMUST00000162746|gb|M87861	Mus musculus selectin, platelet (Selp), mRNA [NM_011347]	GO:0001530(lipopolysaccharide binding)|GO:0001948(glycoprotein binding)|GO:0002687(positive regulation of leukocyte migration)|GO:0002691(regulation of cellular extravasation)|GO:0005515(protein binding)|GO:0005615(extracellular space)|GO:0005634(nucleus)|GO:0005737(cytoplasm)|GO:0006954(inflammatory response)|GO:0007155(cell adhesion)|GO:0007157(heterophilic cell-cell adhesion)|GO:0007159(leukoc…	ATGCCTGCTTTAAGATCTCCTGGGTCTTCCATGTTTCATATCAATGAGGTTGTTTACACC	81.5689	177	197	218	392	544	295	784	114	111	336	451	398	369	237	418	0.57868	0.509174	0.543927	0.879889
A_55_P2144296	Gm17776	predicted gene, 17776	ref|XM_001476568|ref|XM_003688822|ens|ENSMUST00000182643|nap|NAP028115-1	PREDICTED: Mus musculus predicted gene, 17776 (Gm17776), mRNA [XM_001476568]		CAGGAGAGAAACCTTACAAATGTAATGAGTGTGAGAAATCTTTTACAAAGTCACACAAAC	142.685	242	134	165	103	174	110	158	65.2	99.3	93.2	124	120	119	123	113	0.486567	0.601818	0.544193	1.23687
A_30_P01017708			chr13:94189389-94189810_F	lincRNA:chr13:94189389-94189810 forward strand		AGATTTGAAAACTAGAGATTCTGTCAAGCCTGATGTCTCAGAGGAGGAAAGTGGGGACAC	71.5873	44.8	88	105	93.6	110	100	103	47.4	57.8	57.7	68.1	49.2	57.4	51.3	55.9	0.538636	0.550476	0.544556	1.02198
A_30_P01017945			chr7:140016236-140016772_R	lincRNA:chr7:140016236-140016772 reverse strand		TTGTTTGAAATGCAAATGAGAACTGAGGCTTTTCCTGGTGATGCTGCTGCAGCACAACAG	52.7749	46.6	63	58.7	50.9	74.7	84.3	84	34.6	31.7	42	45.2	41.5	47.1	102	53.9	0.549206	0.540034	0.54462	0.983299
A_55_P2081746	Olfr477	olfactory receptor 477	ref|NM_146926|ens|ENSMUST00000091605|gb|BC140427|gb|BC156634	Mus musculus olfactory receptor 477 (Olfr477), mRNA [NM_146926]	GO:0004871(signal transducer activity)|GO:0004930(G-protein coupled receptor activity)|GO:0004984(olfactory receptor activity)|GO:0005886(plasma membrane)|GO:0007165(signal transduction)|GO:0007186(G-protein coupled receptor signaling pathway)|GO:0007608(sensory perception of smell)|GO:0016020(membrane)|GO:0016021(integral to membrane)|GO:0050896(response to stimulus)|GO:0050911(detection of chem…	ATCACAGTGTTTGTCATAGCTGTCTCCTACACCTACATTCTCATCACCATCCTGAATATG	60.6898	28.2	77	57.8	81.3	51.1	127	90.9	38.2	34.3	47.2	36.3	43	51.8	116	96.2	0.496104	0.593426	0.544765	1.19617
A_30_P01031300			chr1:74084292-74138492_R	lincRNA:chr1:74084292-74138492 reverse strand		TTTGGGGTGCCTTAGGGCTTTGTGGGGTGCTTCTTAGATGGAGTTCTTTCCCTCTACAGA	111.041	83.4	91.6	122	134	117	249	165	56.3	58	96.4	112	98.8	107	156	162	0.614629	0.47541	0.545019	0.773491
A_30_P01031077			chr11:58136882-58143829_R	lincRNA:chr11:58136882-58143829 reverse strand		GTAGCTTGCCTATGTTTAATTTACTGATACCTCTTCATAGTTAGTTTACCTACAAAAGGC	49.4767	66.1	65.4	86.1	77.1	115	76.9	80.7	44.3	35.7	56.5	58.1	78.8	60	61.8	62.3	0.67737	0.414634	0.546002	0.612124
A_55_P2022399	Ghrl	ghrelin	ref|NM_021488|ref|NM_001286404|ref|NM_001286405|ref|NM_001286406	Mus musculus ghrelin (Ghrl), transcript variant 1, mRNA [NM_021488]	GO:0000187(activation of MAPK activity)|GO:0001664(G-protein coupled receptor binding)|GO:0001696(gastric acid secretion)|GO:0001937(negative regulation of endothelial cell proliferation)|GO:0005179(hormone activity)|GO:0005576(extracellular region)|GO:0005615(extracellular space)|GO:0005737(cytoplasm)|GO:0007186(G-protein coupled receptor signaling pathway)|GO:0007204(elevation of cytosolic calc…	GCAACTCCCAGCACTCTCCTACCACTTTAAGAATAAATGTTCACCTGTATGCCAAATGTT	142.298	154	147	183	178	182	207	260	85.2	93.8	157	147	166	164	234	197	0.579592	0.512568	0.54608	0.884361
A_30_P01023484			chr2:67410825-67411407_F	lincRNA:chr2:67410825-67411407 forward strand		TTATAATAATTTCTCCACCCATTCCCAGATATGAACAGACAGACAAACAAACATGGAGGA	46.4259	56.5	57.5	76.6	78.2	90.3	65.8	78.8	30	43.7	50.2	42.1	43.5	42.8	74.2	43.9	0.521739	0.570496	0.546118	1.09345
A_55_P2117993	Cep63	centrosomal protein 63	gb|AK137058|tc|TC1712032|riken|9430056M06	Mus musculus 12 days embryo embryonic body between diaphragm region and neck cDNA, RIKEN full-length enriched library, clone:9430056M06 product:hypothetical protein, full insert sequence. [AK137058]	GO:0003674(molecular_function)|GO:0005737(cytoplasm)|GO:0005813(centrosome)|GO:0005856(cytoskeleton)|GO:0006974(response to DNA damage stimulus)|GO:0007049(cell cycle)|GO:0007067(mitosis)|GO:0008150(biological_process)|GO:0051301(cell division)	CAAACATTTCTAGAAATAGGTGGCTGTGGTGATGGTTTCTGGGTTGTCTCCTCTTTCTGA	241.794	231	285	243	272	231	515	577	111	171	184	126	147	328	545	460	0.389474	0.703704	0.546589	1.80681
A_30_P01021257			chr19:44651106-44657612_F	lincRNA:chr19:44651106-44657612 forward strand		TTATGAATCCACAAGGCGACATTTCTAGGTTCCTTAGCAGTCCTGTTGGTGCCTAACCAA	114.397	135	112	84.4	70.7	72.8	111	114	46.7	57.2	38.2	35	51.3	62.8	121	88.3	0.416964	0.677725	0.547345	1.62538
A_30_P01020946			chr2:94046243-94070067_R	lincRNA:chr2:94046243-94070067 reverse strand		GATGCTATGGTATATGTTTCAAATCCTGGCTTTTATGGATAACTCTACCACTGATTTAAG	169.628	156	153	162	72.8	104	55	67.6	77.8	95	61	73.5	35.7	39.7	49.5	52.2	0.508497	0.58642	0.547458	1.15324
A_55_P1960261	Gm608	predicted gene 608	ref|NM_001029889|ens|ENSMUST00000169582|ens|ENSMUST00000119746|gb|AK173333	Mus musculus predicted gene 608 (Gm608), mRNA [NM_001029889]	GO:0003674(molecular_function)|GO:0005575(cellular_component)|GO:0008150(biological_process)	CCAAGGATCAGCAAGGTTTCAGTTTTGAAGGTTGGTTTGTTTGGTTTTTTGTTTTTGTTT	53.8616	83	119	109	113	128	164	150	54.1	69.8	62.4	90.8	93	89.7	150	159	0.454622	0.640367	0.547494	1.40857
A_51_P123314	Olfr74	olfactory receptor 74	ref|NM_054091|ens|ENSMUST00000099840|gb|AB061229|gb|BC140281	Mus musculus olfactory receptor 74 (Olfr74), mRNA [NM_054091]	GO:0004871(signal transducer activity)|GO:0004930(G-protein coupled receptor activity)|GO:0004984(olfactory receptor activity)|GO:0005549(odorant binding)|GO:0005886(plasma membrane)|GO:0005887(integral to plasma membrane)|GO:0007165(signal transduction)|GO:0007186(G-protein coupled receptor signaling pathway)|GO:0007608(sensory perception of smell)|GO:0016020(membrane)|GO:0016021(integral to mem…	TCTTGGGCTTCTCAGATTATCCTGACCTTAAAGTCCCTCTCTTCTTGGTGTTTCTCGTCA	141.052	418	200	280	254	383	450	464	134	119	157	202	211	236	507	334	0.67	0.425	0.5475	0.634328
A_30_P01031484			chr6:052032838-052033444	lincRNA:chr6:52032838-52033444 forward strand		TGTTTTTCCCAGTTCTTCCCTTCACAGCTGATGTAAGTTTGCGCCAATGCCCTTCTTACT	197.215	269	336	336	705	898	815	1090	161	207	596	720	694	570	862	624	0.479167	0.616071	0.547619	1.28571
A_30_P01027556			chr1:64686823-64728598_F	lincRNA:chr1:64686823-64728598 forward strand		GGATCTCTTGGGATGGGGTTTCGTTTTATTTTCATCTTTCTGTGCATTTCTTAATGTCTT	74.8946	150	167	103	209	112	121	161	64.6	73	75.5	122	77.2	103	149	132	0.386826	0.708738	0.547782	1.83219
A_51_P333518	Sh3rf2	SH3 domain containing ring finger 2	ref|NM_172966|ref|NM_001146299|ens|ENSMUST00000074679|ens|ENSMUST00000072008	Mus musculus SH3 domain containing ring finger 2 (Sh3rf2), transcript variant 2, mRNA [NM_172966]	GO:0004864(protein phosphatase inhibitor activity)|GO:0005575(cellular_component)|GO:0008157(protein phosphatase 1 binding)|GO:0008270(zinc ion binding)|GO:0010923(negative regulation of phosphatase activity)|GO:0016874(ligase activity)|GO:0019902(phosphatase binding)|GO:0046872(metal ion binding)	AGAGTTCTCAGGAAAGAATATAAACAGGTCTGGTTGAAGCAATGTTTACACTGACAGAAG	40.4021	45.6	500	562	922	1030	459	506	281	300	347	399	405	413	939	702	0.562	0.533808	0.547904	0.949836
A_55_P2050628	Cyp4a31	cytochrome P450, family 4, subfamily a, polypeptide 31	ref|NM_201640|ref|NM_001252539|ens|ENSMUST00000030480|ens|ENSMUST00000030486	Mus musculus cytochrome P450, family 4, subfamily a, polypeptide 31 (Cyp4a31), transcript variant 1, mRNA [NM_201640]	GO:0004497(monooxygenase activity)|GO:0005737(cytoplasm)|GO:0008391(arachidonic acid monooxygenase activity)|GO:0008392(arachidonic acid epoxygenase activity)|GO:0016324(apical plasma membrane)|GO:0016491(oxidoreductase activity)|GO:0018685(alkane 1-monooxygenase activity)|GO:0036101(leukotriene B4 catabolic process)|GO:0043231(intracellular membrane-bounded organelle)|GO:0046872(metal ion bindin…	TATTAATCCTCACACAAGTTTCTCCATCTTCCCTCCTTTCTGCAATAAAGGTCCAAGTGT	223.077	258	304	399	328	377	404	447	175	208	284	347	341	330	379	331	0.575658	0.521303	0.548481	0.905578
A_55_P2420983	6330575P09Rik	RIKEN cDNA 6330575P09 gene	gb|AK018252|tc|TC1600202|riken|6330575P09	Mus musculus adult male medulla oblongata cDNA, RIKEN full-length enriched library, clone:6330575P09 product:unclassifiable, full insert sequence. [AK018252]		GTCAGGAGCTGGAGTTTTTAGTGCGTATTTGATTTTTGTCCTTAGGATAATTGGCCCCCC	68.8036	103	87.1	130	89.2	111	90	111	51.6	65.6	51.6	58.5	70.9	88.5	49.7	76.8	0.592423	0.504615	0.548519	0.851783
A_55_P1956495	Gm6980	predicted gene 6980	gb|AK086943|tc|TC1593938|riken|E030013G21|nap|NAP087619-1	Mus musculus 0 day neonate lung cDNA, RIKEN full-length enriched library, clone:E030013G21 product:unclassifiable, full insert sequence. [AK086943]		TTCCATCACTTGAATTGAAATTCTACCTATCTGATAATGACAGCCCATTTTCCTTCCCCA	16.5297	50.5	63.8	95	165	195	213	278	35.4	51.6	128	190	184	201	229	177	0.554859	0.543158	0.549008	0.978912
A_55_P2070686	Wdfy1	WD repeat and FYVE domain containing 1	ref|NM_027057|ens|ENSMUST00000113511|ens|ENSMUST00000113510|ens|ENSMUST00000048820	Mus musculus WD repeat and FYVE domain containing 1 (Wdfy1), transcript variant 2, mRNA [NM_027057]	GO:0005545(1-phosphatidylinositol binding)|GO:0005634(nucleus)|GO:0005769(early endosome)|GO:0005829(cytosol)|GO:0008150(biological_process)|GO:0046872(metal ion binding)	ACCCCTCCTCCCATTGTTAGCTGCTTTGAAGACAGAATGACTCCTGTGGATTTATCCTAA	1690.01	2190	2720	3090	2360	3090	2410	2570	1720	1440	1740	2480	2040	2430	1510	1930	0.632353	0.466019	0.549186	0.736961
A_55_P1979126	Tuba3a	tubulin, alpha 3A	ref|NM_009446|ens|ENSMUST00000088246|gb|BC089547|tc|TC1680129	Mus musculus tubulin, alpha 3A (Tuba3a), mRNA [NM_009446]	GO:0005874(microtubule)|GO:0005929(cilium)|GO:0005932(microtubule basal body)|GO:0015630(microtubule cytoskeleton)	CGGCCGTCCATTTATGTCTTCCCCACCATTGGAAATAAAGGATATATTATTAAAATTTCT	1687.4	2930	3210	4420	6900	10000	7520	10600	1820	2350	6000	7950	6730	7320	8110	7490	0.566978	0.531674	0.549326	0.937733
A_52_P140881	Slc26a10	solute carrier family 26, member 10	ref|NM_177615|ens|ENSMUST00000095270|gb|BC089587|nap|NAP041077-1	Mus musculus solute carrier family 26, member 10 (Slc26a10), mRNA [NM_177615]	GO:0003674(molecular_function)|GO:0005575(cellular_component)|GO:0006810(transport)|GO:0008150(biological_process)|GO:0008272(sulfate transport)|GO:0015116(sulfate transmembrane transporter activity)|GO:0015297(antiporter activity)|GO:0016020(membrane)|GO:0016021(integral to membrane)	AGACTCCTGGATAGCGTGTCTCCAGAACAACTCTTTGTGAGTGTCCAGGATGCTGCTGCA	19.8334	26.6	336	347	298	374	286	343	191	184	226	272	218	294	248	304	0.568452	0.530259	0.549356	0.932812
A_30_P01025426			chr18:84757475-84757969_R	lincRNA:chr18:84757475-84757969 reverse strand		ACAAATAGGATTTTAAGTCAGTTAAAACCCATCACTATAGTTGACACCCAAGAACTGTGA	74.551	106	58.2	90.6	59.1	65.3	51.3	59.3	34.9	45.3	69.8	60.5	63.2	74.7	73.5	44.7	0.599656	0.5	0.549828	0.833811
A_51_P191909	Rem2	rad and gem related GTP binding protein 2	ref|NM_080726|ens|ENSMUST00000164766|gb|BC018219|gb|AK090165	Mus musculus rad and gem related GTP binding protein 2 (Rem2), mRNA [NM_080726]	GO:0000166(nucleotide binding)|GO:0003924(GTPase activity)|GO:0005525(GTP binding)|GO:0005886(plasma membrane)|GO:0006184(GTP catabolic process)|GO:0007165(signal transduction)|GO:0007264(small GTPase mediated signal transduction)|GO:0016020(membrane)	CGGAAAGACACTTCAAAAACTAGAACCGAAAAAGTGCTTTGTAGCCTCCTGGATGGAGCT	893.07	1160	723	827	515	697	344	420	428	420	234	289	304	297	398	402	0.591978	0.50786	0.549919	0.857903
A_30_P01024599			chr4:16119250-16149850_R	lincRNA:chr4:16119250-16149850 reverse strand		CACTGATCTTTCTGCTTCCCCAACTTCATCCTGGGCATCTTCTTAGTCATGTTCAGAAGA	107.616	143	178	218	213	264	404	341	106	110	170	205	206	221	331	289	0.595506	0.504587	0.550046	0.847326
A_30_P01027044			chr16:40470294-40470935_F	lincRNA:chr16:40470294-40470935 forward strand		ATGTTCAGAATCCTGTCCTGTGGTCCAAGCCTATGGGAATATCGTTATTGGTTTAGAGCC	186.483	222	192	258	173	195	240	206	113	132	158	195	140	149	214	153	0.588542	0.511628	0.550085	0.869315
A_55_P2075613	Gm13286	predicted gene 13286	ref|NM_001243150|ref|NM_001085528|ens|ENSMUST00000094992|nap|NAP113436-1	Mus musculus predicted gene 13286 (Gm13286), mRNA [NM_001243150]		ATCACACCGATGACTCTGGGAGAAACCACCAGTTGCTACTCCCAGACCCTCAGGCATGTC	116.654	105	153	164	148	203	207	229	82.4	92.3	105	116	128	150	259	179	0.538562	0.562805	0.550683	1.04501
A_55_P2040105	Qser1	glutamine and serine rich 1	ref|NM_001123327	Mus musculus glutamine and serine rich 1 (Qser1), mRNA [NM_001123327]	GO:0003674(molecular_function)|GO:0005575(cellular_component)|GO:0008150(biological_process)	TCTTCGAGAATGTAGCGTTATTAAACACCACCAGCGGCCTTCAGTTACCCAGTCTATTCA	108.063	85.5	124	98.1	100	207	128	131	58.6	61.7	72.4	65.3	85.6	95.7	152	88	0.472581	0.62895	0.550765	1.33088
A_55_P2122474	Edil3	EGF-like repeats and discoidin I-like domains 3	gb|AK046885|tc|TC1594030|riken|B930001A02|nap|NAP083468-1	Mus musculus 10 days neonate cerebellum cDNA, RIKEN full-length enriched library, clone:B930001A02 product:EGF-like repeats and discordin I-like domains 3, full insert sequence. [AK046885]	GO:0005509(calcium ion binding)|GO:0005576(extracellular region)|GO:0007155(cell adhesion)|GO:0007275(multicellular organismal development)|GO:0010811(positive regulation of cell-substrate adhesion)|GO:0046872(metal ion binding)|GO:0070062(extracellular vesicular exosome)	GATACTATTCATGGCAACTTCTGTCTTCTAAGGTTAACATAAAAATACAGGAAACAGCTG	76.2377	71	55.4	62.4	71.2	103	78.4	92	21.8	44.2	67.4	80.5	103	62.2	71.1	52.4	0.393502	0.708333	0.550918	1.80008
A_30_P01031789			chr1:196445304-196445818_R	lincRNA:chr1:196445304-196445818 reverse strand		TCGGGAGGGGATCAGAGTGATGAGAGCACCCCATCCCCTCGCGTGGCGTCACCTGTCACC	2775.95	3570	2320	3470	2370	3030	1290	2180	1460	1640	1380	2040	1370	1830	1220	1390	0.62931	0.472622	0.550966	0.751017
A_66_P104559	4932413F04Rik	RIKEN cDNA 4932413F04 gene	ref|NR_040764|gb|AK077024|tc|TC1607900|riken|4932413F04	Mus musculus RIKEN cDNA 4932413F04 gene (4932413F04Rik), long non-coding RNA [NR_040764]		ATGCGCTGGTTCTGAAAGAGTTCCCTGACTCTGCTTCTTACGTGTTTCATTTTCAAAAAT	103.354	62.8	54.9	78.3	51.8	69.7	133	123	27.9	46.5	47	38.2	59.7	56.5	148	63.6	0.508197	0.59387	0.551033	1.16858
A_55_P2391499	4933415J04Rik	RIKEN cDNA 4933415J04 gene	gb|AK016822|tc|TC1600248|riken|4933415J04|nap|NAP073549-1	Mus musculus adult male testis cDNA, RIKEN full-length enriched library, clone:4933415J04 product:unclassifiable, full insert sequence. [AK016822]		TGGCTCCTGGCTTTGAAAGAAATCCTTGATGGATGTCATAATAAAGAGGCTTGGTGGTGC	68.3915	74.4	63.8	51.2	60.9	67.8	119	103	25	36.4	38.2	45.1	45.6	62.4	92.8	98.1	0.39185	0.710937	0.551394	1.81431
A_30_P01029086			chr10:66574421-66575488_F	lincRNA:chr10:66574421-66575488 forward strand		TTCTTAAATCACTGTTCCCTTGATCGGACATGGATTGAGGCAGCACAGATGGGTTACAGT	80.3429	56	102	106	79.7	78.3	88.3	63.5	60.1	54.5	80	71.6	76.2	76.9	61.6	39.3	0.589216	0.514151	0.551683	0.872602
A_55_P2125144			tc|TC1718914	NDUB5_MOUSE (Q9CQH3) NADH dehydrogenase [ubiquinone] 1 beta subcomplex subunit 5, mitochondrial precursor (NADH-ubiquinone oxidoreductase SGDH subunit) (Complex I-SGDH) (CI-SGDH) , partial (71%) [TC1718914]		TGAGCCACCAGACATGAATACAGCAAGTACGCTTAACTGCTGAACCATCTCTCCCGCCCT	42.8237	31.9	53.3	59.6	82.4	91.8	171	217	34.4	27.3	76	134	85.2	81.1	262	176	0.645403	0.458054	0.551729	0.709717
A_30_P01024301			chr4:128727332-128735227_R	lincRNA:chr4:128727332-128735227 reverse strand		ATGTATTGCCTGGAATTTACCCCCAGTTCCTCAATTGGTTTCCTTTGGTTCAGATGGACC	143.513	146	211	189	231	226	261	289	109	111	119	126	139	154	259	194	0.516588	0.587302	0.551945	1.13689
A_55_P2007678	Xndr-trpc2	Xndr-Trpc2 readthrough	ref|NM_011644|ref|NM_001109897|ref|NR_104582|ens|ENSMUST00000139104	Mus musculus Xndr-Trpc2 readthrough (Xndr-trpc2), transcript variant Xndr-Trpc2 protein, mRNA [NM_011644]		ATTTTCCGGTTCCTTTGCTGTGGCTCCTCCTGCTGCAAAGCCAAGAAGTCGGACTACCCG	2032.32	1660	2900	3520	2250	2690	2120	2460	1630	1910	1860	2280	1830	1900	1800	1940	0.562069	0.542614	0.552341	0.965386
A_55_P2018621	4930590L14Rik	RIKEN cDNA 4930590L14 gene	gb|AK016381|tc|NP741735|riken|4930590L14|nap|NAP074684-1	Mus musculus adult male testis cDNA, RIKEN full-length enriched library, clone:4930590L14 product:unclassifiable, full insert sequence. [AK016381]	GO:0003674(molecular_function)|GO:0005575(cellular_component)|GO:0008150(biological_process)	CCTCATTCTCCCCTCAGAAAACCAAGTAATGTCTTGAATAAATCTTTGGCTTCAATTTAC	55.8666	88.4	102	134	138	110	302	124	45.7	88	86.2	97.4	90.2	108	130	104	0.448039	0.656716	0.552378	1.46576
A_30_P01024855			chr13:72906878-72923790_F	lincRNA:chr13:72906878-72923790 forward strand		ACGTATCAACAGATGGGTATGTCCTCTTTGCCTCTGAAGACACTGCTAAATGAAATGAGC	136.908	156	178	187	189	241	212	211	94.8	107	171	167	142	168	184	195	0.532584	0.572193	0.552388	1.07437
A_52_P262219	Fos	FBJ osteosarcoma oncogene	ref|NM_010234|ens|ENSMUST00000021674|gb|AK159667|gb|AK159688	Mus musculus FBJ osteosarcoma oncogene (Fos), mRNA [NM_010234]	GO:0003677(DNA binding)|GO:0003690(double-stranded DNA binding)|GO:0003700(sequence-specific DNA binding transcription factor activity)|GO:0005515(protein binding)|GO:0005634(nucleus)|GO:0005667(transcription factor complex)|GO:0005737(cytoplasm)|GO:0005783(endoplasmic reticulum)|GO:0006355(regulation of transcription, DNA-dependent)|GO:0006366(transcription from RNA polymerase II promoter)|GO:00…	GGACTTTATTTTCCAGTAGATAGAAATCAATAGCTATATCCATGTACTGTAGTCCTTCAG	533.801	737	2890	4430	3600	4650	2930	3880	1660	2350	2110	3100	2290	2540	2850	2980	0.574394	0.530474	0.552434	0.923536
A_51_P211854	Selp	selectin, platelet	ref|NM_011347|ens|ENSMUST00000161020|ens|ENSMUST00000162746|gb|M87861	Mus musculus selectin, platelet (Selp), mRNA [NM_011347]	GO:0001530(lipopolysaccharide binding)|GO:0001948(glycoprotein binding)|GO:0002687(positive regulation of leukocyte migration)|GO:0002691(regulation of cellular extravasation)|GO:0005515(protein binding)|GO:0005615(extracellular space)|GO:0005634(nucleus)|GO:0005737(cytoplasm)|GO:0006954(inflammatory response)|GO:0007155(cell adhesion)|GO:0007157(heterophilic cell-cell adhesion)|GO:0007159(leukoc…	ATGCCTGCTTTAAGATCTCCTGGGTCTTCCATGTTTCATATCAATGAGGTTGTTTACACC	108.1	139	199	185	452	547	550	697	88.7	122	299	396	326	337	521	438	0.445729	0.659459	0.552594	1.47951
A_30_P01030794			chr8:72076364-72077503_R	lincRNA:chr8:72076364-72077503 reverse strand		ATTGCTTCATGTACTTAAGCCTAGCTCCAACTAAGCTCCTTCCTGTATATGTCTGCCTGG	217.404	188	261	252	285	348	453	418	184	101	212	193	181	187	414	319	0.704981	0.400794	0.552887	0.568517
A_30_P01030247			chr1:108664564-108665243_R	lincRNA:chr1:108664564-108665243 reverse strand		AAATGGGAGATCTTTTTCCTTCATTCCTGTCCAAGGCTTAGTGGATACAGCCATTCCGGT	210.253	180	214	222	282	310	254	252	145	95.4	238	211	260	204	274	161	0.67757	0.42973	0.55365	0.634222
A_52_P378765	Primpol	primase and polymerase (DNA-directed)	ref|NM_001001184|ens|ENSMUST00000136335|ens|ENSMUST00000040468|gb|AK036600	Mus musculus primase and polymerase (DNA-directed) (Primpol), mRNA [NM_001001184]	GO:0003896(DNA primase activity)|GO:0005575(cellular_component)|GO:0006260(DNA replication)|GO:0006269(DNA replication, synthesis of RNA primer)|GO:0008150(biological_process)	GAAATGCTTGGACTTCTTAAGTGATGACTTTCTCTCCTTAAGGTCATCATATTTTGTTTG	84.0523	105	75.3	85.5	69.2	93.9	77.4	91.2	33.1	57.1	71.6	59	89.2	95.2	68.2	61.3	0.439575	0.667836	0.553706	1.51928
A_30_P01032261			chr12:110845020-110850870_F	lincRNA:chr12:110845020-110850870 forward strand		TTATTGCTACGGTTGCCAGACACCTGTCTGCTTGTCAGAGCTGTATTCAACAGGATAACT	57.0802	51.4	52.8	86.7	67.7	81.2	58.7	45.9	25.1	54.8	46.1	62.9	66.1	32.9	33.7	18	0.475379	0.632065	0.553722	1.3296
A_55_P2050069	P2rx3	purinergic receptor P2X, ligand-gated ion channel, 3	gb|AK053021|gb|BB524055|tc|TC1594214|riken|D930017N16	Mus musculus 15 days embryo head cDNA, RIKEN full-length enriched library, clone:D930017N16 product:hypothetical protein, full insert sequence. [AK053021]	GO:0001614(purinergic nucleotide receptor activity)|GO:0001666(response to hypoxia)|GO:0004931(extracellular ATP-gated cation channel activity)|GO:0005216(ion channel activity)|GO:0005524(ATP binding)|GO:0005622(intracellular)|GO:0005791(rough endoplasmic reticulum)|GO:0005794(Golgi apparatus)|GO:0005887(integral to plasma membrane)|GO:0006810(transport)|GO:0006811(ion transport)|GO:0006812(catio…	CTGTGTCCCTTCACACAACACCTGTTCTCAGCAAATTACCCATTAACCTCCTGGGGATAG	227.049	117	221	226	248	224	597	374	111	137	162	220	147	145	439	343	0.502262	0.606195	0.554229	1.20693
A_55_P2114903			ens|ENSMUST00000103657|gb|X83008|gb|M34210|gb|KC335200	T cell receptor alpha variable 12-3 [Source:MGI Symbol;Acc:MGI:3648633] [ENSMUST00000103657]		AAATGCTTTCCTTTTCTGGTATGTGCACTATCTCAATGAATCCCCTTGGCTACTCCTGCG	46.8694	44.4	65.3	56.1	68.1	66.8	139	142	29.2	37.1	51.4	31.6	35.2	76.3	146	113	0.447167	0.661319	0.554243	1.47891
A_55_P1997585						AACTACACTGAGTTTCTTGTCCCATTGAGCCTGGGCTGCATGAGGTTAAAGGGAATGATT	104.58	84.7	109	122	125	151	117	165	61.8	66.1	73.8	71.2	282	281	222	158	0.566972	0.541803	0.554388	0.955608
A_30_P01025480			chr5:149765314-149771786_R	lincRNA:chr5:149765314-149771786 reverse strand		AATATCACGGAAGGCACTCTTTCTTAAAAATAGAAAATTCTCTCCTCTACTCCCTGCTTT	66.9118	118	114	141	134	162	163	184	85.5	50.6	112	125	129	179	220	157	0.75	0.358865	0.554433	0.478487
A_30_P01029534			chr1:139856545-139857204_F	lincRNA:chr1:139856545-139857204 forward strand		AAATTACTTTGAATTGTAGTTAACATATCTGTCCTTTCCCAGTCAAGGGAGGAGTCAACT	173.457	192	154	195	143	127	111	154	92.1	99.7	109	121	93.2	93.2	98.5	95	0.598052	0.511282	0.554667	0.854912
A_30_P01030360			chr11:33414450-33450750_F	lincRNA:chr11:33414450-33450750 forward strand		TGGACTGCAGCATCTTCTAGCTCTTTTCTTCTGTGCTCATTTCTCTGTTTCCCCATTTTC	142.435	86.2	76.3	73.5	83	137	252	317	45.9	37.4	73.5	49.8	46	76.3	244	250	0.601573	0.508844	0.555208	0.845855
A_30_P01033375			chr1:167797702-167798519_R	lincRNA:chr1:167797702-167798519 reverse strand		CTTCTCAGCAACATTAAACTCTGGCCTATAGCATCATAAGACCTGTCGCCTGGGGTGGGA	101.219	64.3	117	85.5	98.1	115	98.7	100	66.9	46.1	80.8	56.3	76.6	70.9	105	92.6	0.571795	0.539181	0.555488	0.942963
A_55_P2161964	AU017193	expressed sequence AU017193	gb|AK153997|riken|E430020C21	Mus musculus 2 days neonate thymus thymic cells cDNA, RIKEN full-length enriched library, clone:E430020C21 product:hypothetical protein, full insert sequence. [AK153997]	GO:0003674(molecular_function)|GO:0005575(cellular_component)|GO:0008150(biological_process)	TGGTATTGGATAAATCTAACTTGTCTTTACAGTCTTTGGTCTGTCACCTCACCAATGTAG	61.7806	183	95.4	119	175	92.2	160	151	49.9	70	94.2	71.8	79.5	88.8	162	100	0.523061	0.588235	0.555648	1.1246
A_55_P2146668	AU023762	expressed sequence AU023762	ref|NR_040760|gb|AK049838|riken|C630002N03|nap|NAP018423-001	Mus musculus expressed sequence AU023762 (AU023762), long non-coding RNA [NR_040760]		TAGCTATTTGCTCCAACGCCGTTGATTGAAAATGTCCTTTGCCTGTTGCTTTTCTATCAC	83.3914	91.6	131	153	140	160	236	378	78.3	78.6	99.7	128	109	124	267	276	0.59771	0.513725	0.555718	0.85949
A_55_P1992413	Gm3414	predicted gene 3414	ref|NR_027993|tc|TC1732943	Mus musculus predicted gene 3414 (Gm3414), long non-coding RNA [NR_027993]		CAGAACTTTGCCTTGAGCATCAAGGTTTTAGCTTTAAAGGTTTAGATGAAATTGGTATGA	89.3619	1690	55.9	60.6	37.3	46.9	14.3	26.2	41.1	22.8	30.8	10.4	36.1	20.1	13.5	11.1	0.735242	0.376238	0.55574	0.51172
A_51_P104783	Rsph6a	radial spoke head 6 homolog A (Chlamydomonas)	ref|NM_031255|ref|NM_001159671|ens|ENSMUST00000035521|gb|BC137992	Mus musculus radial spoke head 6 homolog A (Chlamydomonas) (Rsph6a), transcript variant 1, mRNA [NM_031255]	GO:0003674(molecular_function)|GO:0005622(intracellular)|GO:0005929(cilium)|GO:0008150(biological_process)	TATAGCCCCGAGAACTTCAACCCAATGCTGCCAGCTCTGATTCAGCAAGAGTACCCCAGC	44.5971	81.9	62.1	77	56.1	49	73.2	70.3	39.2	37	48.2	67.7	59.5	59.7	82.9	65.4	0.63124	0.480519	0.55588	0.761231
A_30_P01023535			chr7:67111261-67120645_R	lincRNA:chr7:67111261-67120645 reverse strand		GGTCATGTCATACTTATGTGTGTTATCTCCCTAGTTTTTCATCAGATACTTTGCCCTTCC	462.859	576	302	363	111	186	126	329	167	203	108	138	107	120	112	107	0.55298	0.559229	0.556104	1.0113
A_30_P01026325			chr2:72818943-72826893_F	lincRNA:chr2:72818943-72826893 forward strand		TCAGTGACTCCATATGACGAAGGCTCCAGCCTTAGCCACTAGAAAATTGGACTGAAATGA	188.652	146	229	120	141	138	143	135	93.5	84.6	102	121	133	108	153	86.4	0.408297	0.705	0.556648	1.72668
A_55_P2111985	Prss35	protease, serine, 35	ref|NM_178738|ens|ENSMUST00000036426|ens|ENSMUST00000179574|gb|AK030671	Mus musculus protease, serine, 35 (Prss35), mRNA [NM_178738]	GO:0003824(catalytic activity)|GO:0004252(serine-type endopeptidase activity)|GO:0005576(extracellular region)|GO:0005739(mitochondrion)|GO:0006508(proteolysis)	TATACTAGTGAGCTGCATAAACAAAACTCGTAACTATGGCTTTAAAAACCCAACACTGAA	270.891	313	194	93.9	32.1	63.4	63.3	56.4	74.3	68.6	48	37.2	47.3	51.1	42.6	42.7	0.38299	0.730564	0.556777	1.90753
A_55_P2091279	Ublcp1	ubiquitin-like domain containing CTD phosphatase 1	ens|ENSMUST00000150032	ubiquitin-like domain containing CTD phosphatase 1 [Source:MGI Symbol;Acc:MGI:1933105] [ENSMUST00000150032]	GO:0003674(molecular_function)|GO:0004721(phosphoprotein phosphatase activity)|GO:0005634(nucleus)|GO:0005730(nucleolus)|GO:0008150(biological_process)|GO:0016787(hydrolase activity)	TGTTTGACCTGTCAGTTTTCATTTCCTCGTTTACATGTGCCTGTCTCCTAGGTGTTTTGT	82.5106	142	118	179	145	164	306	243	84.2	71.6	109	141	154	168	287	205	0.713559	0.4	0.55678	0.56057
A_55_P2001334	Gpr31b	G protein-coupled receptor 31, D17Leh66b region	gb|AK036897|tc|TC1599685|riken|9930022F21|nap|NAP117545-1	Mus musculus adult female vagina cDNA, RIKEN full-length enriched library, clone:9930022F21 product:similar to G PROTEIN COUPLED RECEPTOR [Mus musculus], full insert sequence. [AK036897]	GO:0004871(signal transducer activity)|GO:0004930(G-protein coupled receptor activity)|GO:0005886(plasma membrane)|GO:0007165(signal transduction)|GO:0007186(G-protein coupled receptor signaling pathway)|GO:0016020(membrane)|GO:0016021(integral to membrane)	ATTTGAATCACCAGGACAGAGCCTTCCTCCGTTGCACAGTGGCCGTCCTGATGGAGTTGC	94.078	129	255	160	128	123	190	201	134	94.1	118	93.2	118	136	186	137	0.52549	0.588125	0.556808	1.11919
A_55_P2045765	Gm757	predicted gene 757	ref|NM_001033410|gb|AK146725|tc|TC1592744|riken|I920047E06	Mus musculus predicted gene 757 (Gm757), mRNA [NM_001033410]	GO:0008270(zinc ion binding)|GO:0046872(metal ion binding)	TCTCTCTTGTCTCTCTGTCAGGTGCTGAGATGAACATGATAAGGTTTGCAGAGTTCGCAA	926.991	1380	877	1620	910	1770	1370	1650	602	693	769	1360	802	1110	597	899	0.686431	0.427778	0.557104	0.623191
A_55_P2016174	Olfr586	olfactory receptor 586	ref|NM_147111|ens|ENSMUST00000084811|gb|BC104726|tc|TC1599754	Mus musculus olfactory receptor 586 (Olfr586), mRNA [NM_147111]	GO:0004871(signal transducer activity)|GO:0004930(G-protein coupled receptor activity)|GO:0004984(olfactory receptor activity)|GO:0005886(plasma membrane)|GO:0007165(signal transduction)|GO:0007186(G-protein coupled receptor signaling pathway)|GO:0007608(sensory perception of smell)|GO:0016020(membrane)|GO:0016021(integral to membrane)|GO:0050896(response to stimulus)|GO:0050911(detection of chem…	TTGCTTGTGCCTCCTGTAATGAATCCTATCATATACTGTGTGAAGAGCCAACAGATAAGA	63.0283	63.2	52.6	62	67.5	82.2	64.5	78.2	21.4	43.9	26.2	57.8	41.2	53.8	140	64.3	0.406844	0.708065	0.557454	1.74038
A_55_P2021923	Fkbp1a	FK506 binding protein 1a	ens|ENSMUST00000144171|ens|ENSMUST00000126670|gb|AB241120|gb|AK141261	FK506 binding protein 1a [Source:MGI Symbol;Acc:MGI:95541] [ENSMUST00000144171]	GO:0000413(protein peptidyl-prolyl isomerization)|GO:0001933(negative regulation of protein phosphorylation)|GO:0003007(heart morphogenesis)|GO:0003755(peptidyl-prolyl cis-trans isomerase activity)|GO:0004871(signal transducer activity)|GO:0005160(transforming growth factor beta receptor binding)|GO:0005515(protein binding)|GO:0005528(FK506 binding)|GO:0005622(intracellular)|GO:0005623(cell)|GO:0…	GGAAGGGAAGACAAGACAGCCCGCTCACATCCTCCTCTCTGTGCCCCCTTACTTCTATGA	9751.6	10800	15800	19600	15900	17100	12100	12000	9710	9820	10900	11500	10200	11400	8820	10700	0.614557	0.50102	0.557789	0.815255
A_30_P01029264			chr13:94193230-94193710_F	lincRNA:chr13:94193230-94193710 forward strand		GCAGCTAGATAGATATGGTCCCCAGTGCTGTTAATAATAACAGTGCAAATTATTTTTGAA	223.086	232	480	546	361	502	425	397	242	334	250	347	238	285	333	310	0.504167	0.611722	0.557944	1.21333
A_30_P01031709			chr5:111565658-111566257_F	lincRNA:chr5:111565658-111566257 forward strand		TAGATAAAATGTCTTTATTCAGGCCGTCAAGCTGAGGCACATCCATGCTCTTGCTCTGCT	210.181	253	96.9	127	78.4	96.8	113	132	59.8	63.4	38.5	55.2	84.5	94.6	104	79.7	0.617131	0.499213	0.558172	0.808925
A_30_P01029077			chr13:70762342-70776512_R	lincRNA:chr13:70762342-70776512 reverse strand		TAATGAGTGGATGCTCCTCGTGTACATGGGTATGACATCAGGATTGTTGCACATGGGTAT	60.2296	90	58.7	72.4	52.8	78.4	44.3	68	31.4	42.1	41.4	56.3	52	45.4	58.1	52	0.534923	0.581492	0.558208	1.08706
A_55_P2086079						CTTGAATGCATTCTGGCCCACGGTTTCCTTCCTGTTATACTACAATGTGCTGAACATTGG	74.5108	43.1	98.1	123	134	142	157	224	71.8	47.3	87.2	117	106	129	243	170	0.731906	0.384553	0.55823	0.525413
A_52_P262219	Fos	FBJ osteosarcoma oncogene	ref|NM_010234|ens|ENSMUST00000021674|gb|AK159667|gb|AK159688	Mus musculus FBJ osteosarcoma oncogene (Fos), mRNA [NM_010234]	GO:0003677(DNA binding)|GO:0003690(double-stranded DNA binding)|GO:0003700(sequence-specific DNA binding transcription factor activity)|GO:0005515(protein binding)|GO:0005634(nucleus)|GO:0005667(transcription factor complex)|GO:0005737(cytoplasm)|GO:0005783(endoplasmic reticulum)|GO:0006355(regulation of transcription, DNA-dependent)|GO:0006366(transcription from RNA polymerase II promoter)|GO:00…	GGACTTTATTTTCCAGTAGATAGAAATCAATAGCTATATCCATGTACTGTAGTCCTTCAG	580.012	877	3130	4280	3410	4660	2970	4110	1600	2600	2250	3130	2250	2550	2880	3180	0.511182	0.607477	0.559329	1.18838
A_55_P2010321	Ewsr1	Ewing sarcoma breakpoint region 1	ref|NM_001283063|ens|ENSMUST00000093365|gb|AK146791|gb|AK162650	Mus musculus Ewing sarcoma breakpoint region 1 (Ewsr1), transcript variant 4, mRNA [NM_001283063]	GO:0000166(nucleotide binding)|GO:0003676(nucleic acid binding)|GO:0003723(RNA binding)|GO:0005515(protein binding)|GO:0005516(calmodulin binding)|GO:0005634(nucleus)|GO:0005730(nucleolus)|GO:0005737(cytoplasm)|GO:0005886(plasma membrane)|GO:0006351(transcription, DNA-dependent)|GO:0006355(regulation of transcription, DNA-dependent)|GO:0008270(zinc ion binding)|GO:0015030(Cajal body)|GO:0016020(m…	ATACTTAAAAAGTACCCGTACTCAGTACTCAGCCGGCAGCATAATGAAAAGTGGGACTAG	183.489	267	377	285	281	279	183	244	160	198	155	211	210	228	177	190	0.424403	0.694737	0.55957	1.63697
A_51_P100997	Serpinb3c	serine (or cysteine) peptidase inhibitor, clade B, member 3C	ref|NM_201363|ens|ENSMUST00000027565|gb|AK003650|tc|TC1591158	Mus musculus serine (or cysteine) peptidase inhibitor, clade B, member 3C (Serpinb3c), mRNA [NM_201363]	GO:0004867(serine-type endopeptidase inhibitor activity)|GO:0005515(protein binding)|GO:0005576(extracellular region)|GO:0010951(negative regulation of endopeptidase activity)|GO:0030162(regulation of proteolysis)	ATTTTAATCTAGGTTCTTCTAATCTAGCATGTATCTGTGCCCTGTGTCAAGTGAGCTAGA	131.259	138	158	183	128	149	254	214	95.2	94.7	119	122	105	122	179	206	0.602532	0.517486	0.560009	0.858853
A_66_P124284	Syndig1l	synapse differentiation inducing 1 like	ref|NM_001033334|ens|ENSMUST00000095550|gb|AK140195|tc|TC1584926	Mus musculus synapse differentiation inducing 1 like (Syndig1l), mRNA [NM_001033334]	GO:0003674(molecular_function)|GO:0005794(Golgi apparatus)|GO:0008150(biological_process)|GO:0009607(response to biotic stimulus)|GO:0016020(membrane)|GO:0016021(integral to membrane)	ACACCCGCAGTTTTAATGTCCCTCTACTTTCTTTATTTATCCTGGTAATAAACTTTTATG	2655.51	3680	4600	5540	5390	8010	2710	2920	2770	2870	2310	3300	2980	3800	3730	5900	0.602174	0.518051	0.560112	0.860301
A_55_P2044897	Prdm13	PR domain containing 13	ref|NM_001080771|ens|ENSMUST00000095141|ens|ENSMUST00000076206|ens|ENSMUST00000144160	Mus musculus PR domain containing 13 (Prdm13), mRNA [NM_001080771]	GO:0003674(molecular_function)|GO:0003676(nucleic acid binding)|GO:0003677(DNA binding)|GO:0005575(cellular_component)|GO:0005634(nucleus)|GO:0006351(transcription, DNA-dependent)|GO:0006355(regulation of transcription, DNA-dependent)|GO:0008168(methyltransferase activity)|GO:0016740(transferase activity)|GO:0022008(neurogenesis)|GO:0032259(methylation)|GO:0046872(metal ion binding)	TTGCCCTTGCTTCCATTTTGTGCAATCTGTAAGAATAATAAAGATACAAAGGAGAGTTCT	32.8741	90	51.5	53.3	43.3	52.5	85.9	70	23.9	35	31.4	41.2	29.1	49.5	83.6	38.8	0.464078	0.65666	0.560369	1.41498
[truncated: 1,423 more rows]

## Sheet: Table S3
Table S3. The NBH 4 week up-regulated genes.
GE2		Cy3 :252800513657					GE2	Normalization : Data Transformation											over 50							0.1–10
		Cy5 :252800513658					657_1_1	658_1_1	657_1_2	658_1_2	657_1_3	658_1_3	657_1_4	658_1_4	657_2_1	658_2_1	657_2_2	658_2_2	657_2_3	658_2_3	657_2_4	658_2_4
							Y1		Y2		Y3		Y4		Y5		Y6		Y7		Y8		Y6/Y3
[truncated: 101 more rows]

## Sheet: Table S4
Table S4. The NBH 4 week down-regulated genes.
[truncated: 3,305 more rows]

## Sheet: Table S5
Table S5. The ABH 1 week up-regulated genes.
[truncated: 1,872 more rows]

## Sheet: Table S6
Table S6. The ABH 1 week down-regulated genes.
[truncated: 6,135 more rows]

[truncated: 10 more sheets: Table S7, Table S8, Table S9, Table S10, Table S11, Table S12, Table S13, Table S14, Table S15, Table S16]
